# Supplementary material
Source: PubMed Central journal article supplement (PMC2657377)
Supplement: 0810803106_Appendix_PDF.pdf [file 0810803106_Appendix_PDF.pdf]

# SI Appendix

## Overrepresented and Underrepresented Gene Ontology (GO) Terms

To explore the biological functions of the sets of genes identified by our analysis we examined each gene set for overrepresented and underrepresented Gene Ontology (GO) terms using the Generic GO Term Finder at <http://go.princeton.edu/cgi-bin/GOTermFinder>. The results from this analysis are summarized in tables S1-S4 containing the enriched GO terms with the corresponding Bonferroni corrected p-values. The legend for the header of the tables is:

**N Set** – Number of genes in the our gene set with the corresponding GO term (first column)

**N Tot** – Number of genes in the genome with the corresponding GO term (first column)

**p val** – Bonferroni corrected probability for finding the observed **N Set** number or greater number of genes with the corresponding GO term if the genes were sampled from the genome randomly. The probability is computed from the hypergeometric distribution and corrected for multiple hypotheses testing.

The Swiss-Prot identifiers corresponding to the genes from each set can be found in the accompanying word document, Supp\_Info\_GO\_GeneSets.doc. The genes are listed in accordance to the enriched GO terms in the default format of the

Generic GO Term Finder. The total number of Swiss-Prot identifiers used by the GO Term Finder for computing p-values is 38594.

### 1.1 Genes coupled more strongly in non-cancer cells, $\Delta C > 1$

The total number of Swiss-Prot identifiers corresponding to the gene set and used for computing the p-values is 846.

**Table S1**

| <b>GO ID</b> | <b>Term</b>                                                                       | <b>p val</b> | <b>N Set</b> | <b>N Tot</b> |
|--------------|-----------------------------------------------------------------------------------|--------------|--------------|--------------|
| GO:0032501   | multicellular organismal process                                                  | 8.E-24       | 200          | 4721         |
| GO:0032502   | developmental process                                                             | 6.E-13       | 163          | 4393         |
| GO:0048856   | anatomical structure development                                                  | 9.E-13       | 120          | 2822         |
| GO:0009605   | response to external stimulus                                                     | 5.E-12       | 59           | 929          |
| GO:0006936   | muscle contraction                                                                | 5.E-12       | 27           | 200          |
| GO:0048731   | system development                                                                | 1.E-11       | 108          | 2497         |
| GO:0003012   | muscle system process                                                             | 2.E-11       | 27           | 209          |
| GO:0006941   | striated muscle contraction                                                       | 3.E-11       | 17           | 70           |
| GO:0003008   | system process                                                                    | 4.E-11       | 83           | 1701         |
| GO:0048513   | organ development                                                                 | 4.E-11       | 87           | 1832         |
| GO:0007275   | multicellular organismal development                                              | 5.E-11       | 126          | 3206         |
| GO:0007267   | cell-cell signaling                                                               | 3.E-08       | 46           | 758          |
| GO:0065008   | regulation of biological quality                                                  | 6.E-08       | 76           | 1720         |
| GO:0007154   | cell communication                                                                | 1.E-07       | 190          | 6205         |
| GO:0006952   | defense response                                                                  | 1.E-07       | 43           | 712          |
| GO:0051239   | regulation of multicellular organismal process                                    | 3.E-07       | 43           | 732          |
| GO:0051239   | regulation of multicellular organismal process & multicellular organismal process | 3.E-07       | 43           | 732          |
| GO:0006935   | chemotaxis                                                                        | 6.E-07       | 20           | 179          |
| GO:0042330   | taxis                                                                             | 6.E-07       | 20           | 179          |
| GO:0050896   | response to stimulus                                                              | 1.E-06       | 138          | 4213         |
| GO:0048518   | positive regulation of biological process                                         | 3.E-06       | 74           | 1814         |
| GO:0007155   | cell adhesion                                                                     | 4.E-06       | 53           | 1103         |
| GO:0022610   | biological adhesion                                                               | 4.E-06       | 53           | 1103         |
| GO:0032103   | positive regulation of response to external stimulus                              | 4.E-06       | 11           | 50           |
| GO:0007165   | signal transduction                                                               | 5.E-06       | 171          | 5693         |
| GO:0006950   | response to stress                                                                | 3.E-05       | 74           | 1916         |
| GO:0008283   | cell proliferation                                                                | 4.E-05       | 51           | 1118         |
| GO:0048522   | positive regulation of cellular process                                           | 4.E-05       | 66           | 1636         |
| GO:0048869   | cellular developmental process                                                    | 5.E-05       | 74           | 1935         |
| GO:0030154   | cell differentiation                                                              | 5.E-05       | 69           | 1753         |
| GO:0042221   | response to chemical stimulus                                                     | 5.E-05       | 45           | 933          |
| GO:0007626   | locomotory behavior                                                               | 6.E-05       | 22           | 279          |
| GO:0040011   | locomotion                                                                        | 7.E-05       | 33           | 576          |
| GO:0009611   | response to wounding                                                              | 8.E-05       | 32           | 550          |
| GO:0051704   | multi-organism process                                                            | 9.E-05       | 36           | 671          |
| GO:0009653   | anatomical structure morphogenesis                                                | 1.E-04       | 60           | 1461         |
| GO:0007166   | cell surface receptor linked signal transduction                                  | 1.E-04       | 94           | 2731         |

|            |                                                                                              |        |    |      |
|------------|----------------------------------------------------------------------------------------------|--------|----|------|
| GO:0003013 | circulatory system process                                                                   | 2.E-04 | 20 | 248  |
| GO:0008015 | blood circulation                                                                            | 2.E-04 | 20 | 248  |
| GO:0003015 | heart process                                                                                | 2.E-04 | 12 | 87   |
| GO:0060047 | heart contraction                                                                            | 2.E-04 | 12 | 87   |
| GO:0032101 | regulation of response to external stimulus<br>regulation of response to external stimulus & | 3.E-04 | 13 | 109  |
| GO:0032101 | response to external stimulus                                                                | 3.E-04 | 13 | 109  |
| GO:0006968 | cellular defense response                                                                    | 3.E-04 | 10 | 60   |
| GO:0007517 | muscle development                                                                           | 6.E-04 | 21 | 295  |
| GO:0003009 | skeletal muscle contraction                                                                  | 9.E-04 | 5  | 10   |
| GO:0050900 | leukocyte migration                                                                          | 9.E-04 | 10 | 67   |
| GO:0019932 | second-messenger-mediated signaling                                                          | 1.E-03 | 21 | 309  |
| GO:0007610 | behavior<br>regulation of developmental process &                                            | 1.E-03 | 27 | 476  |
| GO:0050793 | developmental process                                                                        | 2.E-03 | 50 | 1228 |
| GO:0048519 | negative regulation of biological process                                                    | 2.E-03 | 66 | 1813 |
| GO:0050793 | regulation of developmental process                                                          | 2.E-03 | 50 | 1230 |
| GO:0009887 | organ morphogenesis                                                                          | 2.E-03 | 34 | 693  |
| GO:0042592 | homeostatic process                                                                          | 3.E-03 | 40 | 910  |
| GO:0042127 | regulation of cell proliferation                                                             | 4.E-03 | 35 | 751  |
| GO:0051707 | response to other organism                                                                   | 4.E-03 | 18 | 252  |
| GO:0006928 | cell motion                                                                                  | 4.E-03 | 31 | 626  |
| GO:0051674 | localization of cell<br>regulation of cell proliferation & cell                              | 4.E-03 | 31 | 626  |
| GO:0042127 | proliferation                                                                                | 5.E-03 | 33 | 696  |
| GO:0030855 | epithelial cell differentiation                                                              | 5.E-03 | 10 | 80   |
| GO:0006874 | cellular calcium ion homeostasis                                                             | 5.E-03 | 14 | 161  |
| GO:0012501 | programmed cell death                                                                        | 6.E-03 | 46 | 1144 |
| GO:0002376 | immune system process                                                                        | 6.E-03 | 63 | 1775 |
| GO:0055074 | calcium ion homeostasis                                                                      | 6.E-03 | 14 | 164  |
| GO:0048584 | positive regulation of response to stimulus                                                  | 7.E-03 | 15 | 188  |
| GO:0008219 | cell death                                                                                   | 1.E-02 | 47 | 1204 |

## 1.1 Genes

### Receptors

nuclear receptor co-repressor 1 C20orf191  
insulin-like growth factor 2 receptor IGF2R  
interferon gamma receptor 2 (interferon gamma transducer 1) IFNGR2  
epidermal growth factor receptor EGFR  
diazepam binding inhibitor (GABA receptor modulator, acyl-Coenzyme A binding protein)  
DBI  
protein tyrosine phosphatase, non-receptor type 1 PTPN1  
integrin, beta 2 (complement component 3 receptor 3 and 4 subunit) ITGB2  
tumor necrosis factor receptor superfamily, member 1B TNFRSF1B  
sortilin-related receptor, L(DLR class) A repeats-containing SORL1  
Fc fragment of IgG, low affinity IIa, receptor (CD32) FCGR2A  
colony stimulating factor 3 receptor (granulocyte) CSF3R

fibroblast growth factor receptor 2 FGFR2  
 Fc fragment of IgG, low affinity IIIa, receptor (CD16a) FCGR3A /// FCGR3B  
 Fc fragment of IgG, low affinity IIIb, receptor (CD16b) FCGR3B  
 Fc fragment of IgE, high affinity I, receptor for; gamma polypeptide FCER1G  
 fibroblast growth factor receptor 3 (achondroplasia, thanatophoric dwarfism) FGFR3  
 folate receptor 1 (adult) FOLR1  
 Fas (TNF receptor superfamily, member 6) FAS  
 interferon (alpha, beta and omega) receptor 2 IFNAR2  
 toll-like receptor 2 TLR2  
 chemokine (C-C motif) receptor 1 CCR1  
 formyl peptide receptor 1 FPR1  
 interleukin 2 receptor, beta IL2RB  
 adenosine A1 receptor ADORA1  
 ryanodine receptor 1 (skeletal) RYR1  
 protein tyrosine phosphatase, non-receptor type 14 PTPN14  
 integrin, alpha M (complement component 3 receptor 3 subunit) ITGAM  
 interleukin 7 receptor IL7R  
 chemokine (C-X3-C motif) receptor 1 CX3CR1  
 interleukin 6 receptor IL6R  
 G protein-coupled receptor 64 GPR64  
 protein tyrosine phosphatase, receptor type, R PTPRR  
 growth factor receptor-bound protein 14 GRB14  
 platelet-activating factor receptor PTAFR  
 nuclear receptor subfamily 0, group B, member 1 NR0B1  
 tumor necrosis factor receptor superfamily, member 8 TNFRSF8  
 leukocyte immunoglobulin-like receptor, subfamily A (without TM domain), member 3 LILRA3  
 anti-Mullerian hormone receptor, type II AMHR2  
 protein tyrosine phosphatase, receptor type, alpha 2 PPFIA2  
 interleukin 8 receptor, beta IL8RB  
 hepatitis A virus cellular receptor 1 HAVCR1  
 colony stimulating factor 2 receptor, alpha, low-affinity (granulocyte-macrophage)  
 CSF2RA  
 neuropeptide Y receptor Y5 NPY5R  
 leukocyte-associated immunoglobulin-like receptor 2 LAIR2  
 egf-like module containing, mucin-like, hormone receptor-like 2 EMR2  
 chemokine-like receptor 1 CMKLR1  
 cannabinoid receptor 1 (brain) CNR1  
 angiotensin II receptor, type 1 AGTR1  
 arginine vasopressin receptor 1B AVPR1B  
 killer cell immunoglobulin-like receptor, two domains, long cytoplasmic tail, 4 KIR2DL4  
 G protein-coupled receptor 15 GPR15  
 leukocyte receptor cluster (LRC) member 4 LENG4  
 interleukin 10 receptor, beta IL10RB  
 G protein-coupled receptor kinase interactor 2 GIT2  
 integrin, alpha X (complement component 3 receptor 4 subunit) ITGAX  
 protein tyrosine phosphatase, receptor type, f polypeptide (PTPRF), alpha 1 PPFIA1  
 colony stimulating factor 2 receptor, alpha, low-affinity (granulocyte-macrophage)  
 CSF2RA

cholecystokinin B receptor CCKBR  
glutamate receptor, ionotropic, N-methyl D-aspartate 2 CGRIN2C  
protein tyrosine phosphatase, receptor type, R PTPRR  
growth factor receptor-bound protein 7 GRB7  
natural cytotoxicity triggering receptor 3 NCR3  
T cell receptor beta variable 19 TRBV19  
T cell receptor beta constant 1 TRBC1  
aryl hydrocarbon receptor nuclear translocator-like ARNTL  
fibroblast growth factor receptor 1 (fms-related tyrosine kinase 2, Pfeiffer syndrome) FGFR1  
Fc fragment of IgG, low affinity IIc, receptor for (CD32) FCGR2C  
leukocyte receptor cluster (LRC) member 4 LENG4  
diazepam binding inhibitor (GABA receptor modulator, acyl-Coenzyme A binding protein)  
DBI  
leukocyte immunoglobulin-like receptor, subfamily B, member 3 LILRB3  
killer cell immunoglobulin-like receptor, two domains, long cytoplasmic tail, 4 KIR2DL4  
pre T-cell antigen receptor alpha PTCRA  
colony stimulating factor 2 receptor, alpha, low-affinity (granulocyte-macrophage)  
CSF2RA  
protein tyrosine phosphatase, receptor type, U PTPRU  
natural cytotoxicity triggering receptor 3 NCR3  
met proto-oncogene (hepatocyte growth factor receptor) MET  
interferon gamma receptor 1 IFNGR1  
EPH receptor B1 EPHB1  
protein tyrosine phosphatase, non-receptor type 18 (brain-derived) PTPN18  
killer cell lectin-like receptor subfamily B, member 1 KLRB1  
protein tyrosine phosphatase, receptor type, f polypeptide (PTPRF), interacting protein (liprin),  
alpha 4 PPFIA4  
neurotrophic tyrosine kinase, receptor, type 3 NTRK3  
G protein-coupled receptor 17 GPR17  
5-hydroxytryptamine (serotonin) receptor 3A HTR3A  
T-cell receptor active beta-chain (V10-D-J-C) mRNA, clone PL3.9  
somatostatin receptor 2 SSTR2  
similar to olfactory receptor, family 7, subfamily A, member 17 LOC441453  
triggering receptor expressed on myeloid cells 1 TREM1  
nuclear receptor interacting protein 3 NRIP3  
purinergic receptor P2Y, G-protein coupled, 13 P2RY13  
apolipoprotein B48 receptor APOB48R  
activin A receptor, type IIB ACVR2B  
complement component 5a receptor 1 C5AR1  
CD244 molecule, natural killer cell receptor 2B4 CD244  
G protein-coupled receptor 88 GPR88  
chemokine (C-C motif) receptor 10 CCR10  
cholinergic receptor, nicotinic, alpha 9 CHRNA9  
free fatty acid receptor 2 FFAR2  
purinergic receptor P2X, ligand-gated ion channel, 2 P2RX2  
cholinergic receptor, muscarinic 4 CHRM4  
melanocortin 4 receptor MC4R  
G protein-coupled receptor 137 GPR137

interleukin 27 receptor, alpha IL27RA  
paired immunoglobulin-like type 2 receptor alpha PILRA  
cadherin, EGF LAG seven-pass G-type receptor 3 (flamingo homolog, Drosophila)  
CELSR3

### Cancer related

melanoma antigen family B, 1 MAGEB1  
melanoma antigen family A, 8 MAGEA8  
melanoma antigen family A, 10 MAGEA10  
melanoma antigen family A, 11 MAGEA11  
melanoma antigen family A, 4 MAGEA4  
v-myc myelocytomatosis viral oncogene homolog 1, lung carcinoma derived (avian) MYCL1  
breast carcinoma amplified sequence 3 BCAS3  
palate, lung and nasal epithelium carcinoma associated PLUNC  
amphiphysin (Stiff-Man syndrome with breast cancer 128kDa autoantigen) AMPH  
cancer susceptibility candidate 3 CASC3  
synuclein, gamma (breast cancer-specific protein 1) SNCG  
similar to cervical cancer suppressor-1 LOC400410  
tumor necrosis factor, alpha-induced protein 2 TNFAIP2  
tumor necrosis factor receptor superfamily, member 1B TNFRSF1B  
tumor necrosis factor receptor superfamily, member 8 TNFRSF8  
tumor necrosis factor (ligand) superfamily, member 14 TNFSF14  
deleted in malignant brain tumors 1 DMBT1  
tumor protein D52-like 1 TPD52L1  
tumor protein p73-like TP73L  
fibroblast growth factor 3 oncogene homolog FGF3  
RAS-like, family 10, member A RASL10A

## 2.1 Genes whose correlation vectors in cancer and non-cancer are least correlated, $\rho_{i(s1,s2)} < 0.2$

The total number of Swiss-Prot identifiers corresponding to the gene set and used for computing the p-values is 1552.

**Table S2**

| <b>GO ID</b> | <b>Term</b>                                                 | <b>p val</b> | <b>N Set</b> | <b>N Tot</b> |
|--------------|-------------------------------------------------------------|--------------|--------------|--------------|
| GO:0032502   | developmental process                                       | 4.E-17       | 257          | 4393         |
| GO:0007275   | multicellular organismal development                        | 2.E-11       | 187          | 3206         |
| GO:0048856   | anatomical structure development                            | 3.E-11       | 170          | 2822         |
| GO:0032501   | multicellular organismal process                            | 9.E-11       | 248          | 4721         |
| GO:0048513   | organ development                                           | 1.E-10       | 123          | 1832         |
| GO:0048522   | positive regulation of cellular process                     | 1.E-09       | 111          | 1636         |
| GO:0048518   | positive regulation of biological process                   | 2.E-09       | 119          | 1814         |
| GO:0048519   | negative regulation of biological process                   | 4.E-09       | 118          | 1813         |
| GO:0050793   | regulation of developmental process & developmental process | 4.E-09       | 90           | 1228         |
| GO:0050793   | regulation of developmental process                         | 4.E-09       | 90           | 1230         |
| GO:0048731   | system development                                          | 1.E-08       | 147          | 2497         |
| GO:0048523   | negative regulation of cellular process                     | 3.E-08       | 109          | 1675         |
| GO:0008283   | cell proliferation                                          | 8.E-08       | 81           | 1118         |
| GO:0006091   | generation of precursor metabolites and energy              | 1.E-06       | 48           | 537          |
| GO:0012501   | programmed cell death                                       | 1.E-06       | 79           | 1144         |
| GO:0006915   | apoptosis                                                   | 2.E-06       | 78           | 1135         |
| GO:0009653   | anatomical structure morphogenesis                          | 3.E-06       | 93           | 1461         |
| GO:0008219   | cell death                                                  | 3.E-06       | 81           | 1204         |
| GO:0016265   | death                                                       | 3.E-06       | 81           | 1208         |
| GO:0051093   | negative regulation of developmental process                | 3.E-06       | 48           | 555          |
| GO:0007507   | heart development                                           | 4.E-06       | 28           | 227          |
| GO:0009887   | organ morphogenesis                                         | 1.E-05       | 54           | 693          |
| GO:XXXXXXX   | unannotated                                                 | 3.E-05       | 468          | 11418        |
| GO:0042127   | regulation of cell proliferation & cell proliferation       | 4.E-05       | 53           | 696          |
| GO:0042127   | regulation of cell proliferation                            | 8.E-05       | 55           | 751          |
| GO:0031325   | positive regulation of cellular metabolic process           | 1.E-04       | 54           | 738          |
| GO:0042981   | regulation of apoptosis                                     | 1.E-04       | 58           | 819          |
| GO:0043067   | regulation of programmed cell death                         | 1.E-04       | 58           | 828          |
| GO:0043067   | regulation of programmed cell death & programmed cell death | 1.E-04       | 58           | 828          |
| GO:0009893   | positive regulation of metabolic process                    | 3.E-04       | 54           | 762          |
| GO:0010604   | positive regulation of macromolecule metabolic process      | 3.E-04       | 52           | 722          |
| GO:0010604   | positive regulation of macromolecule                        | 3.E-04       | 52           | 722          |

|            |                                                |        |    |      |
|------------|------------------------------------------------|--------|----|------|
|            | metabolic process & macromolecule              |        |    |      |
|            | metabolic process                              |        |    |      |
|            | enzyme linked receptor protein signaling       |        |    |      |
| GO:0007167 | pathway                                        | 3.E-04 | 38 | 451  |
| GO:0051094 | positive regulation of developmental process   | 6.E-04 | 44 | 579  |
| GO:0051239 | regulation of multicellular organismal process | 1.E-03 | 51 | 732  |
|            | regulation of multicellular organismal process |        |    |      |
| GO:0051239 | & multicellular organismal process             | 1.E-03 | 51 | 732  |
| GO:0043066 | negative regulation of apoptosis               | 1.E-03 | 31 | 349  |
|            | energy derivation by oxidation of organic      |        |    |      |
| GO:0015980 | compounds                                      | 1.E-03 | 18 | 139  |
| GO:0006936 | muscle contraction                             | 2.E-03 | 22 | 200  |
| GO:0043069 | negative regulation of programmed cell death   | 2.E-03 | 31 | 354  |
| GO:0001501 | skeletal system development                    | 2.E-03 | 31 | 355  |
| GO:0065008 | regulation of biological quality               | 2.E-03 | 94 | 1720 |
| GO:0005977 | glycogen metabolic process                     | 3.E-03 | 11 | 55   |
| GO:0006073 | glucan metabolic process                       | 3.E-03 | 11 | 56   |
| GO:0003012 | muscle system process                          | 3.E-03 | 22 | 209  |
| GO:0007243 | protein kinase cascade                         | 5.E-03 | 39 | 528  |
|            | positive regulation of macromolecule           |        |    |      |
| GO:0010557 | biosynthetic process                           | 6.E-03 | 43 | 611  |
|            | positive regulation of macromolecule           |        |    |      |
|            | biosynthetic process & macromolecule           |        |    |      |
| GO:0010557 | biosynthetic process                           | 6.E-03 | 43 | 611  |
| GO:0007267 | cell-cell signaling                            | 6.E-03 | 50 | 758  |
|            | positive regulation of cellular biosynthetic   |        |    |      |
| GO:0031328 | process                                        | 6.E-03 | 44 | 633  |
| GO:0032879 | regulation of localization                     | 8.E-03 | 29 | 344  |
| GO:0032879 | regulation of localization & localization      | 8.E-03 | 29 | 344  |
| GO:0009891 | positive regulation of biosynthetic process    | 8.E-03 | 44 | 639  |
| GO:0006916 | anti-apoptosis                                 | 9.E-03 | 22 | 222  |
| GO:0006112 | energy reserve metabolic process               | 9.E-03 | 11 | 62   |
| GO:0005976 | polysaccharide metabolic process               | 9.E-03 | 14 | 100  |

## 2.2 Genes

### Oncogenes

CDC42 effector protein (Rho GTPase binding) 2 CDC42EP2  
 Rho-related BTB domain containing 2 RHOBTB2  
 CDC42 effector protein (Rho GTPase binding) 3 CDC42EP3  
 Rho-related BTB domain containing 3 RHOBTB3  
 myosin phosphatase-Rho interacting protein M-RIP  
 Rho GTPase activating protein 8 /// PRR5-ARHGAP8 fusion ARHGAP8 /// LOC553158  
 FYVE, RhoGEF and PH domain containing 6 FGD6  
 Rho-related BTB domain containing 3 RHOBTB3  
 ras homolog gene family, member Q RHOQ  
 Rho-related BTB domain containing 2 RHOBTB2  
 ras homolog gene family, member T1 RHOT1  
 Rab acceptor 1 (prenylated) RABAC1  
 RAN binding protein 5 RANBP5

Ras protein-specific guanine nucleotide-releasing factor 1 RASGRF1  
Ras-related associated with diabetes RRAD  
Ras-related GTP binding D RRAGD  
RAB14, member RAS oncogene family RAB14  
RAB21, member RAS oncogene family RAB21  
Ras protein-specific guanine nucleotide-releasing factor 1 RASGRF1  
RAB31, member RAS oncogene family RAB31  
RAB3B, member RAS oncogene family RAB3B  
RAS guanyl releasing protein 3 (calcium and DAG-regulated) RASGRP3  
RAB27B, member RAS oncogene family RAB27B  
golgi reassembly stacking protein 2, 55kDa GORASP2  
related RAS viral (r-ras) oncogene homolog 2 RRAS2  
RAB7A, member RAS oncogene family RAB7A  
RAB22A, member RAS oncogene family RAB22A  
RAS p21 protein activator 4 /// hypothetical protein FLJ21767 FLJ21767 /// RASA4  
v-Ki-ras2 Kirsten rat sarcoma viral oncogene homolog KRAS  
RAP2B, member of RAS oncogene family RAP2B  
v-ral simian leukemia viral oncogene homolog B (ras related; GTP binding protein) RALB  
RAB14, member RAS oncogene family RAB14  
translocated promoter region (to activated MET oncogene) TPR  
ret proto-oncogene RET  
v-kit Hardy-Zuckerman 4 feline sarcoma viral oncogene homolog KIT  
RAB31, member RAS oncogene family RAB31  
vav 3 oncogene VAV3  
fibroblast growth factor 3 (oncogene homolog) FGF3  
RAB27B, member RAS oncogene family RAB27B  
v-myc myelocytomatosis viral related oncogene, neuroblastoma derived (avian) MYCN  
myeloproliferative leukemia virus oncogene MPL  
related RAS viral (r-ras) oncogene homolog 2 RRAS2  
runt-related transcription factor 1 (acute myeloid leukemia 1; aml1 oncogene) RUNX1  
epidermal growth factor receptor (erythroblastic leukemia viral oncogene homolog, avian)  
EGFR  
BMI1 polycomb ring finger oncogene BMI1  
RAB7A, member RAS oncogene family RAB7A  
RAB22A, member RAS oncogene family RAB22A  
v-Ki-ras2 Kirsten rat sarcoma viral oncogene homolog KRAS  
SKI-like oncogene SKIL  
vav 3 oncogene VAV3  
v-maf musculoaponeurotic fibrosarcoma oncogene homolog (avian) MAF  
RAP2B, member of RAS oncogene family RAP2B  
lipocalin 2 (oncogene 24p3) LCN2  
mitogen-activated protein kinase 12 MAPK12  
mitogen-activated protein kinase 7 MAPK7  
mitogen-activated protein kinase 1 MAPK1  
mitogen-activated protein kinase-activated protein kinase 2 MAPKAPK2  
tumor necrosis factor receptor superfamily, member 1A TNFRSF1A  
fibroblast growth factor 3 (murine mammary tumor virus integration oncogene homolog) FGF3  
tumor necrosis factor receptor superfamily, member 8 TNFRSF8

tumor necrosis factor receptor superfamily, member 10b TNFRSF10B  
tumor necrosis factor receptor superfamily, member 10d TNFRSF10D  
tumor necrosis factor, alpha-induced protein 6 TNFAIP6  
rhabdoid tumor deletion region gene 1 RTDR1  
tumor necrosis factor receptor superfamily, member 11b (osteoprotegerin) TNFRSF11B  
tumor necrosis factor, alpha-induced protein 6 TNFAIP6  
ADAM metallopeptidase domain 17 (tumor necrosis factor, alpha) ADAM17  
arginine-rich, mutated in early stage tumors ARMET  
tumor protein p53 inducible protein 11 TP53I11  
cancer/testis antigen 1B /// cancer/testis antigen 1A CTAG1A /// CTAG1B  
synuclein, gamma (breast cancer-specific protein 1) SNCG  
leucine zipper, down-regulated in cancer 1 LDOC1  
cancer/testis antigen 2 CTAG2

### Dehydrogenases

NADH dehydrogenase (ubiquinone) 1 alpha subcomplex, 1, 7.5kDa NDUFA1  
aldehyde dehydrogenase 1 family, member A1 ALDH1A1  
isocitrate dehydrogenase 2 (NADP+), mitochondrial IDH2  
aldehyde dehydrogenase 1 family, member A2 ALDH1A2  
NADH dehydrogenase (ubiquinone) Fe-S protein 7, 20kDa (NADH-coenzyme Q reductase)  
NDUFS7  
NAD(P)H dehydrogenase, quinone 2 NQO2  
aldehyde dehydrogenase 5 family, member A1 ALDH5A1  
pyruvate dehydrogenase kinase, isozyme 2 PDK2  
hydroxyacyl-Coenzyme A dehydrogenase HADH  
dehydrogenase/reductase (SDR family) member 9 DHRS9  
dehydrogenase E1 and transketolase domain containing 1 DHTKD1  
succinate dehydrogenase complex, subunit A, flavoprotein pseudogene 1SDHALP1  
hydroxysteroid (17-beta) dehydrogenase 8 HSD17B8  
aldehyde dehydrogenase 3 family, memberA1 ALDH3A1  
isocitrate dehydrogenase 3 (NAD+) alpha IDH3A  
acyl-Coenzyme A dehydrogenase, C-4 to C-12 straight chain ACADM  
NADH dehydrogenase (ubiquinone) 1 alpha subcomplex, 3, 9kDa NDUFA3  
isocitrate dehydrogenase 2 (NADP+), mitochondrial IDH2  
NADH dehydrogenase (ubiquinone) 1 alpha subcomplex, 4, 9kDa NDUFA4  
NADH dehydrogenase (ubiquinone) 1 beta subcomplex, 8, 19kDa NDUF8  
NADH dehydrogenase (ubiquinone) flavoprotein 2, 24kDa NDUFV2  
NADH dehydrogenase (ubiquinone) 1 beta subcomplex, 11, 17.3kDa NDUF11  
dehydrogenase/reductase (SDR family) member 7 DHRS7  
hydroxysteroid (11-beta) dehydrogenase 1 HSD11B1  
hydroxysteroid (17-beta) dehydrogenase 1 HSD17B1

### 3.1 Genes whose correlation vectors in cancer and non-cancer are most separated (in Euclidian sense) in the space of genes, $D_{i(s1,s2)} > 30$

The total number of Swiss-Prot identifiers corresponding to the gene set and used for computing the p-values is 1641.

**Table S3**

| <b>GO ID</b> | <b>Term</b>                                                 | <b>p val</b> | <b>N Set</b> | <b>N Tot</b> |
|--------------|-------------------------------------------------------------|--------------|--------------|--------------|
| GO:0048518   | positive regulation of biological process                   | 6.E-22       | 177          | 1814         |
| GO:0048522   | positive regulation of cellular process                     | 8.E-22       | 165          | 1636         |
| GO:0048523   | negative regulation of cellular process                     | 7.E-20       | 163          | 1675         |
| GO:0050793   | regulation of developmental process & developmental process | 8.E-20       | 133          | 1228         |
| GO:0050793   | regulation of developmental process                         | 1.E-19       | 133          | 1230         |
| GO:0012501   | programmed cell death                                       | 9.E-19       | 125          | 1144         |
| GO:0048519   | negative regulation of biological process                   | 1.E-18       | 169          | 1813         |
| GO:0006915   | apoptosis                                                   | 1.E-18       | 124          | 1135         |
| GO:0043067   | regulation of programmed cell death                         | 4.E-17       | 99           | 828          |
| GO:0043067   | regulation of programmed cell death & programmed cell death | 4.E-17       | 99           | 828          |
| GO:0042981   | regulation of apoptosis                                     | 6.E-17       | 98           | 819          |
| GO:0008219   | cell death                                                  | 6.E-17       | 125          | 1204         |
| GO:0016265   | death                                                       | 8.E-17       | 125          | 1208         |
| GO:0032502   | developmental process                                       | 1.E-12       | 295          | 4393         |
| GO:0043069   | negative regulation of programmed cell death                | 1.E-11       | 52           | 354          |
| GO:0008380   | RNA splicing                                                | 2.E-11       | 43           | 256          |
| GO:0043066   | negative regulation of apoptosis                            | 3.E-11       | 51           | 349          |
| GO:0006396   | RNA processing                                              | 2.E-10       | 70           | 616          |
| GO:0016043   | cellular component organization                             | 5.E-10       | 207          | 2933         |
| GO:0006091   | generation of precursor metabolites and energy              | 3.E-09       | 62           | 537          |
| GO:0051094   | positive regulation of developmental process                | 3.E-09       | 65           | 579          |
| GO:0051093   | negative regulation of developmental process                | 4.E-09       | 63           | 555          |
| GO:XXXXXX    | unannotated                                                 | 2.E-08       | 610          | 11418        |
| GO:0043065   | positive regulation of apoptosis                            | 5.E-08       | 47           | 370          |
| GO:0043068   | positive regulation of programmed cell death                | 7.E-08       | 47           | 374          |
| GO:0031325   | positive regulation of cellular metabolic process           | 1.E-07       | 72           | 738          |
| GO:0051128   | regulation of cellular component organization               | 1.E-07       | 47           | 381          |
| GO:0006366   | transcription from RNA polymerase II promoter               | 1.E-07       | 83           | 912          |
| GO:0032268   | regulation of cellular protein metabolic process            | 3.E-07       | 46           | 376          |
| GO:0015980   | energy derivation by oxidation of organic compounds         | 3.E-07       | 26           | 139          |
| GO:0006917   | induction of apoptosis                                      | 4.E-07       | 40           | 302          |

|            |                                                                                                |        |     |      |
|------------|------------------------------------------------------------------------------------------------|--------|-----|------|
| GO:0012502 | induction of programmed cell death                                                             | 5.E-07 | 40  | 303  |
| GO:0044419 | interspecies interaction between organisms                                                     | 5.E-07 | 40  | 303  |
| GO:0009893 | positive regulation of metabolic process                                                       | 5.E-07 | 72  | 762  |
| GO:0008283 | cell proliferation                                                                             | 6.E-07 | 94  | 1118 |
| GO:0043933 | macromolecular complex subunit organization                                                    | 6.E-07 | 88  | 1020 |
| GO:0010604 | positive regulation of macromolecule metabolic process                                         | 8.E-07 | 69  | 722  |
| GO:0010604 | metabolic process                                                                              | 8.E-07 | 69  | 722  |
| GO:0006916 | anti-apoptosis                                                                                 | 8.E-07 | 33  | 222  |
| GO:0042274 | ribosomal small subunit biogenesis                                                             | 8.E-07 | 8   | 10   |
| GO:0031328 | positive regulation of cellular biosynthetic process                                           | 9.E-07 | 63  | 633  |
| GO:0022613 | ribonucleoprotein complex biogenesis and assembly                                              | 1.E-06 | 39  | 298  |
| GO:0031324 | negative regulation of cellular metabolic process                                              | 1.E-06 | 67  | 698  |
| GO:0009891 | positive regulation of biosynthetic process                                                    | 1.E-06 | 63  | 639  |
| GO:0009892 | negative regulation of metabolic process                                                       | 1.E-06 | 69  | 733  |
| GO:0065008 | regulation of biological quality                                                               | 2.E-06 | 127 | 1720 |
| GO:0010605 | negative regulation of macromolecule metabolic process                                         | 2.E-06 | 66  | 694  |
| GO:0022900 | electron transport chain                                                                       | 3.E-06 | 25  | 143  |
| GO:0051246 | regulation of protein metabolic process                                                        | 3.E-06 | 53  | 505  |
| GO:0000375 | RNA splicing, via transesterification reactions                                                | 3.E-06 | 19  | 84   |
| GO:0000377 | RNA splicing, via transesterification reactions with bulged adenosine as nucleophile           | 3.E-06 | 19  | 84   |
| GO:0000398 | nuclear mRNA splicing, via spliceosome                                                         | 3.E-06 | 19  | 84   |
| GO:0006357 | regulation of transcription from RNA polymerase II promoter                                    | 9.E-06 | 66  | 719  |
| GO:0010557 | positive regulation of macromolecule biosynthetic process                                      | 1.E-05 | 59  | 611  |
| GO:0010557 | positive regulation of macromolecule biosynthetic process & macromolecule biosynthetic process | 1.E-05 | 59  | 611  |
| GO:0033036 | macromolecule localization                                                                     | 1.E-05 | 102 | 1320 |
| GO:0007242 | intracellular signaling cascade                                                                | 1.E-05 | 156 | 2306 |
| GO:0045941 | positive regulation of transcription cellular macromolecular complex subunit organization      | 1.E-05 | 54  | 539  |
| GO:0034621 | organization                                                                                   | 2.E-05 | 71  | 810  |
| GO:0045935 | positive regulation of nucleobase, nucleoside, nucleotide and nucleic acid metabolic process   | 2.E-05 | 56  | 575  |
| GO:0010628 | positive regulation of gene expression                                                         | 2.E-05 | 54  | 548  |
| GO:0010628 | positive regulation of gene expression & gene expression                                       | 2.E-05 | 54  | 548  |
| GO:0042127 | regulation of cell proliferation                                                               | 2.E-05 | 67  | 751  |
| GO:0006913 | nucleocytoplasmic transport                                                                    | 3.E-05 | 30  | 219  |
| GO:0051169 | nuclear transport                                                                              | 4.E-05 | 30  | 221  |
| GO:0051170 | nuclear import                                                                                 | 4.E-05 | 23  | 139  |
| GO:0015031 | protein transport                                                                              | 5.E-05 | 89  | 1135 |

|            |                                                                                              |        |     |       |
|------------|----------------------------------------------------------------------------------------------|--------|-----|-------|
| GO:0046907 | intracellular transport                                                                      | 5.E-05 | 89  | 1135  |
| GO:0008104 | protein localization                                                                         | 5.E-05 | 96  | 1259  |
| GO:0045184 | establishment of protein localization                                                        | 6.E-05 | 89  | 1139  |
| GO:0006996 | organelle organization                                                                       | 6.E-05 | 100 | 1334  |
| GO:0006605 | protein targeting                                                                            | 6.E-05 | 36  | 304   |
| GO:0065003 | macromolecular complex assembly                                                              | 7.E-05 | 77  | 938   |
| GO:0045893 | positive regulation of transcription, DNA-dependent                                          | 7.E-05 | 47  | 461   |
| GO:0022607 | cellular component assembly                                                                  | 8.E-05 | 81  | 1010  |
| GO:0051254 | positive regulation of RNA metabolic process                                                 | 8.E-05 | 47  | 464   |
| GO:0045333 | cellular respiration                                                                         | 8.E-05 | 16  | 72    |
| GO:0007243 | protein kinase cascade                                                                       | 1.E-04 | 51  | 528   |
| GO:0022618 | ribonucleoprotein complex assembly                                                           | 1.E-04 | 24  | 157   |
| GO:0048856 | anatomical structure development                                                             | 1.E-04 | 178 | 2822  |
| GO:0006606 | protein import into nucleus                                                                  | 2.E-04 | 22  | 137   |
| GO:0051649 | establishment of localization in cell                                                        | 2.E-04 | 102 | 1402  |
| GO:0016071 | mRNA metabolic process                                                                       | 2.E-04 | 37  | 334   |
| GO:0048513 | organ development                                                                            | 3.E-04 | 125 | 1832  |
| GO:0050794 | regulation of cellular process                                                               | 3.E-04 | 539 | 10504 |
| GO:0051641 | cellular localization                                                                        | 4.E-04 | 104 | 1457  |
| GO:0030029 | actin filament-based process                                                                 | 4.E-04 | 40  | 384   |
| GO:0046637 | regulation of alpha-beta T cell differentiation                                              | 6.E-04 | 8   | 18    |
| GO:0045934 | negative regulation of nucleobase, nucleoside, nucleotide and nucleic acid metabolic process | 6.E-04 | 49  | 527   |
| GO:0006119 | oxidative phosphorylation                                                                    | 6.E-04 | 25  | 185   |
| GO:0017038 | protein import                                                                               | 7.E-04 | 24  | 173   |
| GO:0030036 | actin cytoskeleton organization                                                              | 7.E-04 | 38  | 363   |
| GO:0006397 | mRNA processing                                                                              | 7.E-04 | 32  | 279   |
| GO:0010608 | posttranscriptional regulation of gene expression                                            | 8.E-04 | 25  | 187   |
| GO:0006886 | intracellular protein transport                                                              | 8.E-04 | 58  | 678   |
| GO:0042127 | regulation of cell proliferation & cell proliferation                                        | 9.E-04 | 59  | 696   |
| GO:0046649 | lymphocyte activation                                                                        | 9.E-04 | 34  | 310   |
| GO:0022904 | respiratory electron transport chain                                                         | 1.E-03 | 16  | 85    |
| GO:0008154 | actin polymerization or depolymerization                                                     | 1.E-03 | 17  | 96    |
| GO:0007015 | actin filament organization                                                                  | 1.E-03 | 22  | 153   |
| GO:0009060 | aerobic respiration                                                                          | 1.E-03 | 13  | 57    |
| GO:0052548 | regulation of endopeptidase activity                                                         | 1.E-03 | 16  | 86    |
| GO:0042775 | mitochondrial ATP synthesis coupled electron transport                                       | 1.E-03 | 14  | 67    |
| GO:0050789 | regulation of biological process                                                             | 2.E-03 | 547 | 10828 |
| GO:0065007 | biological regulation                                                                        | 2.E-03 | 573 | 11416 |
| GO:0008064 | regulation of actin polymerization or depolymerization                                       | 2.E-03 | 15  | 79    |
| GO:0052547 | regulation of peptidase activity                                                             | 2.E-03 | 16  | 90    |
| GO:0042773 | ATP synthesis coupled electron transport                                                     | 2.E-03 | 14  | 70    |
| GO:0016192 | vesicle-mediated transport                                                                   | 3.E-03 | 62  | 770   |
| GO:0045321 | leukocyte activation                                                                         | 3.E-03 | 36  | 355   |
| GO:0042306 | regulation of protein import into nucleus                                                    | 3.E-03 | 10  | 36    |

|            |                                                                                                   |        |    |     |
|------------|---------------------------------------------------------------------------------------------------|--------|----|-----|
| GO:0030097 | hemopoiesis                                                                                       | 4.E-03 | 33 | 314 |
| GO:0010629 | negative regulation of gene expression                                                            | 4.E-03 | 45 | 497 |
| GO:0043281 | regulation of caspase activity                                                                    | 4.E-03 | 15 | 83  |
| GO:0006120 | mitochondrial electron transport, NADH to ubiquinone                                              | 4.E-03 | 11 | 45  |
| GO:0010558 | negative regulation of macromolecule biosynthetic process                                         | 4.E-03 | 48 | 549 |
| GO:0008632 | apoptotic program                                                                                 | 5.E-03 | 18 | 118 |
| GO:0006417 | regulation of translation                                                                         | 5.E-03 | 19 | 130 |
| GO:0016481 | negative regulation of transcription                                                              | 6.E-03 | 43 | 476 |
| GO:0008064 | regulation of actin polymerization or depolymerization & actin polymerization or depolymerization | 6.E-03 | 14 | 76  |
| GO:0050871 | positive regulation of B cell activation                                                          | 7.E-03 | 9  | 31  |
| GO:0046634 | regulation of alpha-beta T cell activation                                                        | 8.E-03 | 8  | 24  |
| GO:0051129 | negative regulation of cellular component organization                                            | 8.E-03 | 18 | 122 |
| GO:0034622 | cellular macromolecular complex assembly                                                          | 8.E-03 | 58 | 729 |
| GO:0051253 | negative regulation of RNA metabolic process                                                      | 8.E-03 | 36 | 372 |
| GO:0022411 | cellular component disassembly                                                                    | 8.E-03 | 17 | 111 |
| GO:0030832 | regulation of actin filament length                                                               | 9.E-03 | 14 | 78  |
| GO:0031327 | negative regulation of cellular biosynthetic process                                              | 9.E-03 | 48 | 564 |
| GO:0046632 | alpha-beta T cell differentiation                                                                 | 9.E-03 | 9  | 32  |

## 3.2 Genes

### Ras Super Family

Rho GDP dissociation inhibitor (GDI) alpha ARHGDI  
 Rho GDP dissociation inhibitor (GDI) LOC728908  
 Rho GDP dissociation inhibitor (GDI) beta ARHGDIB  
 Rho guanine nucleotide exchange factor (GEF) 11 ARHGEF11  
 Rho-related BTB domain containing 3 RHOBTB3  
 Rho GTPase activating protein 4 ARHGAP4  
 Rho GTPase activating protein 25 ARHGAP25  
 Rho GTPase activating protein 26 ARHGAP26  
 Rho guanine nucleotide exchange factor (GEF) 15 ARHGEF15  
 Rho GTPase activating protein 8 /// PRR5-ARHGAP8 fusion ARHGAP8 /// LOC553158  
 Rho GTPase-activating protein RICS  
 Rho GDP dissociation inhibitor (GDI) alpha ARHGDI  
 Rho guanine nucleotide exchange factor (GEF) 4 ARHGEF4  
 Rho-related BTB domain containing 1 RHOBTB1  
 Rho-related BTB domain containing 3 RHOBTB3  
 CDC42 effector protein (Rho GTPase binding) 4 CDC42EP4  
 Rho GTPase activating protein 15 ARHGAP15  
 Rho guanine nucleotide exchange factor (GEF) 10-like ARHGEF10L  
 Rho GTPase activating protein 8 /// PRR5-ARHGAP8 fusion ARHGAP8 /// LOC553158

Rho GTPase activating protein 25      ARHGAP25  
 Ras and Rab interactor 3RIN3  
 Ras association (RalGDS/AF-6) domain family 2 RASSF2  
 Ras association (RalGDS/AF-6) domain family 1 RASSF1  
 connector enhancer of kinase suppressor of Ras 1      CNKSR1  
 Ras-related GTP binding D      RRAGD  
 Ras association (RalGDS/AF-6) domain family 7 RASSF7  
 RAN, member RAS oncogene family      RAN  
 RAB13, member RAS oncogene family      RAB13  
 neuroblastoma RAS viral (v-ras) oncogene homolog      NRAS  
 Ras association (RalGDS/AF-6) domain family 2 RASSF2  
 RAB21, member RAS oncogene family      RAB21  
 RAB30, member RAS oncogene family      RAB30  
 RAS guanyl releasing protein 2 (calcium and DAG-regulated)      RASGRP2  
 RAB27A, member RAS oncogene family RAB27A  
 RAB14, member RAS oncogene family      RAB14  
 RAB7A, member RAS oncogene family      RAB7A  
 RAB, member of RAS oncogene family-like 4      RABL4  
 RAP2B, member of RAS oncogene family      RAP2B  
 RAB31, member RAS oncogene family      RAB31  
 RAB22A, member RAS oncogene family RAB22A  
 Ras association (RalGDS/AF-6) domain family 7 RASSF7  
 RAB26, member RAS oncogene family      RAB26

### MAPK

mitogen-activated protein kinase 1      MAPK1  
 mitogen-activated protein kinase-activated protein kinase 2      MAPKAPK2  
 mitogen-activated protein kinase-activated protein kinase 5      MAPKAPK5  
 mitogen-activated protein kinase 11      MAPK11  
 mitogen-activated protein kinase 14      MAPK14

### TNF

tumor necrosis factor receptor superfamily, member 1A TNFRSF1A  
 tumor necrosis factor receptor superfamily, member 1B TNFRSF1B  
 tumor necrosis factor, alpha-induced protein 2 TNFAIP2  
 tumor necrosis factor, alpha-induced protein 3 TNFAIP3  
 tumor necrosis factor, alpha-induced protein 8 TNFAIP8  
 tumor necrosis factor (ligand) superfamily, member 10 TNFSF10  
 tumor necrosis factor receptor superfamily, member 10c MGC31957 /// TNFRSF10C  
 tumor necrosis factor receptor superfamily, member 10d,      TNFRSF10D  
 tumor necrosis factor receptor superfamily, member 13B TNFRSF13B  
 tumor necrosis factor (ligand) superfamily, member 14 TNFSF14

### Bcl-2 Family

myeloid cell leukemia sequence 1 (BCL2-related)MCL1  
 BCL2-associated transcription factor 1      BCLAF1  
 BCL2-associated athanogene 5      BAG5  
 BCL2-antagonist/killer 1BAK1

BCL2/adenovirus E1B 19kDa interacting protein 1      BNIP1  
 BCL2/adenovirus E1B 19kDa interacting protein 2      BNIP2  
 BCL2-associated athanogene 2      BAG2  
 BCL2-associated transcription factor 1      BCLAF1  
 BCL2-associated athanogene 3      BAG3  
 BCL2/adenovirus E1B 19kDa interacting protein 3-like      BNIP3L

### Caspases

caspase 1, apoptosis-related cysteine peptidase (interleukin 1, beta, convertase)      CASP1  
 caspase 4, apoptosis-related cysteine peptidase      CASP4  
 caspase 6, apoptosis-related cysteine peptidase      CASP6  
 caspase 8, apoptosis-related cysteine peptidase      CASP8  
 caspase 9, apoptosis-related cysteine peptidase      CASP9  
 caspase 10, apoptosis-related cysteine peptidase      CASP10  
 apoptosis, caspase activation inhibitor      AVEN

### Other apoptosis related genes

SIVA1, apoptosis-inducing factor      SIVA1  
 NLR family, apoptosis inhibitory protein      LOC728519 /// NAIP  
 apoptosis inhibitor      FKSG2  
 nucleolar protein 3 (apoptosis repressor with CARD domain)      NOL3  
 tumor protein p53 binding protein, 2      TP53BP2

### Dehydrogenases

malate dehydrogenase 1, NAD (soluble)      MDH1  
 pyruvate dehydrogenase (lipoamide) alpha 1      PDHA1  
 hydroxyacyl-Coenzyme A dehydrogenase/3-ketoacyl-Coenzyme A thiolase/enoyl-Coenzyme A hydratase (trifunctional protein), beta subunit      HADHB  
 lactate dehydrogenase B      LDHB  
 hydroxyacyl-Coenzyme A dehydrogenase      HADH  
 NADH dehydrogenase (ubiquinone) 1 beta subcomplex, 8, 19kDa      NDUFB8  
 NADH dehydrogenase (ubiquinone) Fe-S protein 3, (NADH-coenzyme Q reductase)      NDUF3  
 isocitrate dehydrogenase 3 (NAD+) alpha      IDH3A  
 NADH dehydrogenase (ubiquinone) 1 alpha subcomplex, 1, 7.5kDa      NDUFA1  
 acyl-Coenzyme A dehydrogenase, C-4 to C-12 straight chain      ACADM  
 succinate dehydrogenase complex, subunit B, iron sulfur (Ip)      SDHB  
 NADH dehydrogenase (ubiquinone) flavoprotein 2, 24kDa      NDUFV2  
 NADH dehydrogenase (ubiquinone) Fe-S protein 1, (NADH-coenzyme Q reductase)      NDUF1  
 pyruvate dehydrogenase complex, component X      PDHX  
 UDP-glucose dehydrogenase      UGDH  
 NADH dehydrogenase (ubiquinone) 1 beta subcomplex, 3, 12kDa      NDUFB3  
 NADH dehydrogenase (ubiquinone) 1 beta subcomplex, 5, 16kDa      NDUFB5  
 isovaleryl Coenzyme A dehydrogenase      IVD  
 dihydropyrimidine dehydrogenase      DPYD  
 aldehyde dehydrogenase 7 family, member A1      ALDH7A1  
 malate dehydrogenase 2, NAD (mitochondrial)      MDH2  
 hydroxysteroid dehydrogenase like 2      HSDL2  
 isocitrate dehydrogenase 3 (NAD+) beta      IDH3B  
 pyruvate dehydrogenase (lipoamide) beta      PDHB  
 hydroxyacyl-Coenzyme A dehydrogenase      HADH  
 NADH dehydrogenase (ubiquinone) Fe-S protein 7, (NADH-coenzyme Q reductase)      NDUF7  
 glycerol-3-phosphate dehydrogenase 1-like      GPD1L  
 dihydrolipoamide S-acetyltransferase (E2 component of pyruvate dehydrogenase complex)      DLAT

glyceraldehyde-3-phosphate dehydrogenase GAPDH  
 malate dehydrogenase 2, NAD (mitochondrial) MDH2  
 glyceraldehyde-3-phosphate dehydrogenase GAPDH  
 hydroxysteroid (17-beta) dehydrogenase 8 HSD17B8  
 lactate dehydrogenase B LDHB  
 glyceraldehyde-3-phosphate dehydrogenase GAPDH  
 NADH dehydrogenase (ubiquinone) 1 alpha subcomplex, 4, 9kDa NDUFA4  
 hydroxysteroid (17-beta) dehydrogenase 11 HSD17B11  
 NADH dehydrogenase (ubiquinone) 1 alpha subcomplex, 8, 19kDa NDUFA8  
 NADH dehydrogenase (ubiquinone) 1 beta subcomplex, 11, 17.3kDa NDUFB11  
 NADH dehydrogenase (ubiquinone) 1 alpha subcomplex, 13 NDUFA13  
 succinate dehydrogenase complex, subunit A, flavoprotein pseudogene 1 SDHALP1  
 glyceraldehyde-3-phosphate dehydrogenase GAPDH

### Cytochrome c

cytochrome c oxidase subunit Va COX5A  
 cytochrome c oxidase subunit Vb COX5B  
 cytochrome c oxidase subunit VIc COX6C  
 cytochrome c oxidase subunit VIIa polypeptide 2 (liver) COX7A2  
 cytochrome c oxidase subunit VIIb COX7B  
 cytochrome c oxidase subunit VIIc COX7C  
 COX10 homolog, cytochrome c oxidase assembly protein, heme A: farnesyltransferase COX10  
 ubiquinol-cytochrome c reductase binding protein UQCRB  
 ubiquinol-cytochrome c reductase core protein I UQCRC1  
 cytochrome c, somatic CYCS  
 ubiquinol-cytochrome c reductase, Rieske iron-sulfur polypeptide 1 UQCRFS1  
 ubiquinol-cytochrome c reductase complex (7.2 kD) UCRC

#### 4. Genes from the biggest cluster of correlation vectors

The total number of Swiss-Prot identifiers corresponding to the gene set and used for computing the p-values is 5198.

**Table S4**

| GO ID      | Term                                             | p val  | N Set | N Tot |
|------------|--------------------------------------------------|--------|-------|-------|
| GO:XXXXXX  | unannotated                                      | 4.E-83 | 1795  | 11418 |
| GO:0032501 | multicellular organismal process                 | 7.E-51 | 839   | 4721  |
| GO:0007267 | cell-cell signaling                              | 1.E-34 | 208   | 758   |
| GO:0003008 | system process                                   | 1.E-24 | 333   | 1701  |
| GO:0007275 | multicellular organismal development             | 3.E-24 | 540   | 3206  |
| GO:0048856 | anatomical structure development                 | 1.E-23 | 486   | 2822  |
| GO:0048731 | system development                               | 2.E-23 | 441   | 2497  |
| GO:0050877 | neurological system process                      | 4.E-22 | 272   | 1338  |
| GO:0032502 | developmental process                            | 7.E-21 | 679   | 4393  |
| GO:0019935 | cyclic-nucleotide-mediated signaling             | 8.E-20 | 56    | 120   |
|            | G-protein signaling, coupled to cyclic           |        |       |       |
| GO:0007187 | nucleotide second messenger                      | 3.E-19 | 53    | 111   |
| GO:0007601 | visual perception                                | 2.E-17 | 79    | 237   |
| GO:0050953 | sensory perception of light stimulus             | 3.E-17 | 79    | 238   |
| GO:0019932 | second-messenger-mediated signaling              | 1.E-16 | 92    | 309   |
| GO:0048513 | organ development                                | 2.E-15 | 320   | 1832  |
| GO:0019226 | transmission of nerve impulse                    | 1.E-14 | 111   | 437   |
| GO:0007268 | synaptic transmission                            | 9.E-14 | 99    | 379   |
| GO:0007399 | nervous system development                       | 2.E-13 | 207   | 1079  |
| GO:0048518 | positive regulation of biological process        | 2.E-12 | 306   | 1814  |
| GO:0048522 | positive regulation of cellular process          | 3.E-12 | 281   | 1636  |
| GO:0007166 | cell surface receptor linked signal transduction | 8.E-12 | 423   | 2731  |
| GO:0009887 | organ morphogenesis                              | 4.E-11 | 143   | 693   |
| GO:0050890 | cognition                                        | 7.E-11 | 181   | 955   |
| GO:0030154 | cell differentiation                             | 4.E-10 | 288   | 1753  |
| GO:0009653 | anatomical structure morphogenesis               | 6.E-10 | 248   | 1461  |
| GO:0007154 | cell communication                               | 1.E-09 | 833   | 6205  |
|            | transcription from RNA polymerase II             |        |       |       |
| GO:0006366 | promoter                                         | 2.E-09 | 170   | 912   |
| GO:0008283 | cell proliferation                               | 3.E-09 | 198   | 1118  |
| GO:0031279 | regulation of cyclase activity                   | 8.E-09 | 36    | 94    |
| GO:0001501 | skeletal system development                      | 8.E-09 | 84    | 355   |
| GO:0045761 | regulation of adenylate cyclase activity         | 1.E-08 | 35    | 91    |
| GO:0051339 | regulation of lyase activity                     | 2.E-08 | 36    | 96    |
| GO:0007600 | sensory perception                               | 2.E-08 | 160   | 865   |
| GO:0048869 | cellular developmental process                   | 2.E-08 | 304   | 1935  |
| GO:0003002 | regionalization                                  | 6.E-08 | 56    | 203   |
| GO:0019933 | cAMP-mediated signaling                          | 1.E-07 | 32    | 83    |

|            |                                                                                                |        |     |      |
|------------|------------------------------------------------------------------------------------------------|--------|-----|------|
| GO:0007188 | G-protein signaling, coupled to cAMP nucleotide second messenger                               | 1.E-07 | 31  | 79   |
| GO:0007389 | pattern specification process                                                                  | 3.E-07 | 68  | 280  |
| GO:0007167 | enzyme linked receptor protein signaling pathway                                               | 3.E-07 | 95  | 451  |
| GO:0007165 | signal transduction                                                                            | 4.E-07 | 754 | 5693 |
| GO:0042127 | regulation of cell proliferation & cell proliferation                                          | 8.E-07 | 130 | 696  |
| GO:0048523 | negative regulation of cellular process                                                        | 8.E-07 | 262 | 1675 |
| GO:0042127 | regulation of cell proliferation                                                               | 1.E-06 | 137 | 751  |
| GO:0000003 | reproduction                                                                                   | 2.E-06 | 139 | 766  |
| GO:0006357 | regulation of transcription from RNA polymerase II promoter                                    | 2.E-06 | 132 | 719  |
| GO:0048519 | negative regulation of biological process                                                      | 3.E-06 | 277 | 1813 |
| GO:0007610 | behavior                                                                                       | 3.E-06 | 96  | 476  |
| GO:0022414 | reproductive process                                                                           | 3.E-06 | 137 | 761  |
| GO:0009952 | anterior/posterior pattern formation                                                           | 9.E-06 | 40  | 138  |
| GO:0045762 | positive regulation of adenylate cyclase activity                                              | 9.E-06 | 22  | 51   |
| GO:0009891 | positive regulation of biosynthetic process                                                    | 1.E-05 | 118 | 639  |
| GO:0031281 | positive regulation of cyclase activity                                                        | 1.E-05 | 22  | 52   |
| GO:0045935 | positive regulation of nucleobase, nucleoside, nucleotide and nucleic acid metabolic process   | 2.E-05 | 108 | 575  |
| GO:0010557 | positive regulation of macromolecule biosynthetic process                                      | 2.E-05 | 113 | 611  |
| GO:0010557 | positive regulation of macromolecule biosynthetic process & macromolecule biosynthetic process | 2.E-05 | 113 | 611  |
| GO:0051239 | regulation of multicellular organismal process                                                 | 2.E-05 | 130 | 732  |
| GO:0051239 | regulation of multicellular organismal process & multicellular organismal process              | 2.E-05 | 130 | 732  |
| GO:0031328 | positive regulation of cellular biosynthetic process                                           | 2.E-05 | 116 | 633  |
| GO:0051349 | positive regulation of lyase activity                                                          | 3.E-05 | 22  | 54   |
| GO:0048598 | embryonic morphogenesis                                                                        | 6.E-05 | 66  | 303  |
| GO:0048705 | skeletal system morphogenesis                                                                  | 7.E-05 | 29  | 89   |
| GO:0009790 | embryonic development                                                                          | 8.E-05 | 109 | 597  |
| GO:0035270 | endocrine system development                                                                   | 8.E-05 | 25  | 70   |
| GO:0030182 | neuron differentiation                                                                         | 1.E-04 | 88  | 456  |
| GO:0009893 | positive regulation of metabolic process                                                       | 1.E-04 | 131 | 762  |
| GO:0007190 | activation of adenylate cyclase activity                                                       | 1.E-04 | 13  | 22   |
| GO:0009628 | response to abiotic stimulus                                                                   | 2.E-04 | 69  | 334  |
| GO:0051254 | positive regulation of RNA metabolic process                                                   | 3.E-04 | 88  | 464  |
| GO:0010604 | positive regulation of macromolecule metabolic process                                         | 3.E-04 | 124 | 722  |
| GO:0010604 | positive regulation of macromolecule metabolic process & macromolecule metabolic process       | 3.E-04 | 124 | 722  |
| GO:0031325 | positive regulation of cellular metabolic process                                              | 4.E-04 | 126 | 738  |
| GO:0050906 | detection of stimulus involved in sensory                                                      | 4.E-04 | 23  | 65   |

|            |                                                                    |        |     |      |
|------------|--------------------------------------------------------------------|--------|-----|------|
|            | perception                                                         |        |     |      |
| GO:0007215 | glutamate signaling pathway                                        | 4.E-04 | 14  | 27   |
| GO:0045893 | positive regulation of transcription, DNA-dependent                | 4.E-04 | 87  | 461  |
| GO:0009605 | response to external stimulus                                      | 5.E-04 | 151 | 929  |
| GO:0010628 | positive regulation of gene expression                             | 5.E-04 | 99  | 548  |
| GO:0010628 | positive regulation of gene expression & gene expression           | 5.E-04 | 99  | 548  |
| GO:0048732 | gland development                                                  | 8.E-04 | 33  | 120  |
| GO:0045941 | positive regulation of transcription                               | 9.E-04 | 97  | 539  |
| GO:0010646 | regulation of cell communication                                   | 1.E-03 | 130 | 784  |
| GO:0010646 | regulation of cell communication & cell communication              | 1.E-03 | 130 | 784  |
| GO:0051094 | positive regulation of developmental process                       | 1.E-03 | 102 | 579  |
| GO:0009888 | tissue development                                                 | 1.E-03 | 79  | 417  |
| GO:0048699 | generation of neurons                                              | 1.E-03 | 93  | 516  |
| GO:0048468 | cell development                                                   | 2.E-03 | 137 | 842  |
| GO:0065008 | regulation of biological quality                                   | 2.E-03 | 249 | 1720 |
| GO:0008277 | regulation of G-protein coupled receptor protein signaling pathway | 2.E-03 | 18  | 47   |
| GO:0009416 | response to light stimulus                                         | 2.E-03 | 37  | 148  |
| GO:0003013 | circulatory system process                                         | 2.E-03 | 53  | 248  |
| GO:0008015 | blood circulation                                                  | 2.E-03 | 53  | 248  |
| GO:0007186 | G-protein coupled receptor protein signaling pathway               | 3.E-03 | 250 | 1734 |
| GO:0045165 | cell fate commitment                                               | 3.E-03 | 38  | 155  |
| GO:0007631 | feeding behavior                                                   | 3.E-03 | 20  | 57   |
| GO:0022008 | neurogenesis                                                       | 3.E-03 | 97  | 553  |
| GO:0008285 | negative regulation of cell proliferation                          | 4.E-03 | 68  | 351  |
| GO:0007586 | digestion                                                          | 5.E-03 | 28  | 101  |
| GO:0031324 | negative regulation of cellular metabolic process                  | 7.E-03 | 115 | 698  |
