# Supplementary material
Source: PubMed Central journal article supplement (PMC2657377)
Supplement: 0810803106_ST1_PDF.pdf [file 0810803106_ST1_PDF.pdf]

## Dataset S1

### 1. Genes coupled more strongly in non-cancer cells, $\Delta C > 1$

P-value cutoff 0.01

Calculate FDR Yes

Gene list Uploaded file

Largest\_Magnitude\_Changes\_1.00\_871.dat\_SwissProt.dat

Annotation file gene\_association.goa\_human

Evidence codes included IEA IEP IGI NAS IPI ND IC ISS NR RCA IDA IMP  
TAS

Unknown identifiers A2RUA0 A1L0W6 A1Z2N6 Q08E86 A2VCQ7 Q53H32  
A1A584 Q53HV3 Q6IBU4 O60343 A2RRQ6 Q4LE41 Q1ZYL6 A2N6W9 O14597  
A0FIK7 O43862 Q9P0N2 A2RTX1 O95410 Q5D035 A1L3U1 A1ECK7 Q7Z675  
O75591 Q0VD99 O14853 A2SX35 A0N0L5 Q05B41 Q4F970 A1L4G9 Q8TBA2  
Q8TBA2 Q05BW1 A0PJI2 Q14543 Q68DG7 O60574 A1L4G7 O14598 A1L4C4  
A1L4J4 O95616 A1L4G3 A0JNS4 Q5UBZ1 P78517 Q9BYH2 Q3KQX9 A0JNV7  
Q05KQ8 A1Z2L5 P24557 Q59F66 A2TKE3 Q08AL8 A1A510 Q6NTC6 O00547  
Q59F66 A0A4Z1 Q2HXV1 Q53XS7 Q05DF0 A1YLA1 Q05BS8 Q3ZCT3 Q6IPL3  
A2RU94 Q7LBY6 Q9P0F3 O95173 Q8N854 Q9BUN9 Q70LR4 P43363 A2RU15  
O43397 A0SEH4 O15398 Q05B41 Q68DB0 A0N6Y5 A2VCQ7 Q05DF0 Q641Q2  
A1L3Y0 Q6P525 O00547 O00547 Q59EN4 O00197 A0JNS4 A0PJF7 A2VCQ7  
A1Z2M9 A1L3Y0 A0N5G7 Q96GX2 A2RU15 Q0VF46 Q7Z4L4 Q05BT4 Q49AE1  
Q7Z637 Q6IB39 Q56VN4 O60283 Q05BP9 A2IXV4 O60460 O60460 A1L4G7  
A2RTX1 Q2M1Z1 Q2TAN6 Q6ICC2 A2RUJ5 O95192 Q6PJ28 A2RUB8 A2RU77  
Q7Z377 O75090 Q5D035 A2NVQ1 A2RTX1 A2NUT2 Q14CB2 A0A5C9 Q9P0F3  
A1L199 Q5BQ95 Q53Y35 Q05DN2 Q1WWL6 Q6FIG5 Q6NSL4 Q9NRX3  
Q6MZY9 Q4KN17 Q14BN2 Q68DG0 Q9H2Y3 Q9H6Q0 Q7Z377 Q68CK3  
Q6ZMX3 Q8IYD2 Q6FIF5 Q96NS8 Q5CZ74 Q6ZSP3 Q6ZSP3 Q307T1 A2RU68  
Q1ZYL9 Q5U3C1 Q68A20 Q32N04 Q9P007 Q8WUT8 Q59FS2 Q0VD81 Q6P9E1  
Q53EW6 Q8NI58 Q6TDC3 Q08AI8 Q6N028 Q4KN31 Q53YU7 Q4KRP5 Q6GU65  
Q29S24 Q9H8W2 Q9H5L9 Q4QQJ1 A4QMZ8 Q49AL9 Q8NC49 Q5JV25 Q05D99  
Q52LY3 Q2PAD7 Q4KRP5 Q2PAD7 Q8WWA4 Q9H051 Q3B861 Q9H095  
Q86YN7 Q32MC3 Q2M3R2 Q9BXY1 A0JLT4 Q9H7C9 Q68D78 Q6PJF8 A0JNV9  
Q56VN4 Q9H6V9 O00446 Q05C44 Q8N9I4 Q14DU8 O95276 Q53ZZ2 Q53ZZ2  
Q86Z03 Q5CZ74 Q59F90

Terms from the process ontology with p-value  $\leq 0.01$ .

The total number of genes used to calculate the background distribution of GO terms is 38594.

-- 1 of 1303--

GOID GO:0032501

TERM multicellular organismal process

P-VALUE 6.2823387785981e-27

CORRECTED P-VALUE 8.18588742851332e-24

NUM\_ANNOTATIONS 200 (of 4721)

ANNOTATED\_GENES P78562, Q9Y508, Q9Y6N9, P09758, P23409, Q02962, P46098, O15079, P01258, P55011, P10916, P05107, Q14641, P68133, Q8TDN2, P02144, P12882, P02585, P25063, Q9NZG7, P02818, P21815, P43005, Q16568, Q9Y576, P53674, P06753, P28908, P22607, P20929, P13805, P47901, O60907, P43699, Q96A32, P49418, P30556, P30542, Q13153, O15513, P52564, Q567P6, Q6W4X9, P63316, P01732, P08590, A0JLR9, O14958, P48788, P05067, P12821, O60663, P10645, P56706, Q16671, O96001, Q9UHC6, P08631, P20800, P45378, Q9NP98, O15273, P37058, O75829, Q00872, Q08289, Q13467, Q13642, P23297, P00790, Q8TBJ5, Q16623, P17661, P60953, P51843, O94907, O60938, P29762, P04626, P30273, Q15761, Q10588, P33121, Q9UHP9, P50553, P43080, P21579, O75444, P48307, Q15303, P68032, P23760, P54762, O00590, Q9NP62, P05976, Q9UKW6, Q8NFY4, P52179, Q13835, P18428, P35548, Q6UWB1, O75508, P14138, P13942, Q9Y6X6, P22303, Q12951, O60882, P11686, P25105, O00526, Q9UGM1, Q16352, O60603, P50461, P31645, O43320, P02686, P47989, P12259, Q02577, Q9Y691, P31025, Q5T4W7, P29973, P16871, P01009, P02679, P01127, P11684, P08842, P41161, O96014, Q13326, P16520, O75923, P35243, P05111, P78363, Q16517, O94933, P32004, P30990, A1E959, Q05315, P53673, P01286, Q99801, P08034, O43315, P18075, Q9BYG5, P12272, P35240, Q96L96, P40205, P21730, Q13705, P17540, Q13424, P08151, P15692, P26678, P54845, O14931, P20702, P56178, O15492, P51114, P06729, O75366, P30874, O14786, P19237, Q14254, Q9BS40, Q13402, O75474, P51692, O75593, P61278, P11487, P08620, Q13117, Q9H3D4, P14091, P49407, P20142, Q9UBF9, O75534, O95497, P32245, O43248, O15296, P43694, P35680, P49757, O60662

-- 2 of 1303--

GOID GO:0032502

TERM developmental process

P-VALUE 4.76784140002821e-16

CORRECTED P-VALUE 6.21249734423675e-13

NUM\_ANNOTATIONS 163 (of 4393)

ANNOTATED\_GENES P78562, Q9Y508, Q13387, P23409, Q02962, P35609, P01258, P10916, P27216, P05107, Q14641, P68133, P02144, P25063, Q9NZG7, P02818, P24855, P21815, Q16568, Q9Y576, P06748, P28908, P22607, P20929, P43699, Q96A32, O43557, P30556, P30542, Q13153, O14613, O15513, Q9UKI2, P63316, P01732, P08590, O14958, P05067, P12821, O60663, P25025, P56706, Q16671, O96001, P29466, P25445, O95470, P08631, Q13087, Q9NP98, Q14457, O15273, P37058, O75829, Q08289, Q13642, Q13467, Q9NS25, Q8TBJ5, P60953, O94907, P20333, P51843, P29762, P04626, P30273, O43272, Q10588, P50553, O75444, Q15303, P68032, P23760, P54762, O00590, Q9NP62, P05976, Q9UKW6, Q8NFI4, Q13835, P35548, Q6UWB1, O75508, P14138, P13942, Q9Y6X6, P14784, P22303, Q12951, O60882, O00526, Q9UGM1, Q16352, O60603, P50461, Q9UGM3, O96028, O43320, P02686, O15020, P47989, Q02577, Q9H2J4, Q5T4W7, P16871, P01127, P11684, P08842, P41161, O96014, Q13326, P00709, P05111, Q16517, O94933, P32004, A1E959, Q05315, P01286, P08034, Q99801, O75414, P18075, Q9BYG5, P12272, O95243, P35240, P62753, Q96L96, P40205, Q13705, P08151, Q13424, P15692, Q9H832, P54845, P26678, P20702, O14931, P56178, P51114, P06729, O75366, Q14254, O14786, Q99698, Q13402, O75474, O60383, O75593, P51692, P61278, P11487, P08620, Q13117, Q9H3D4, O75534, O95497, O43248, O15296, P43694, P35680, P49757

-- 3 of 1303--

GOID GO:0048856

TERM anatomical structure development

P-VALUE 7.02437406354466e-16

CORRECTED P-VALUE 9.15275940479869e-13

NUM\_ANNOTATIONS 120 (of 2822)

ANNOTATED\_GENES P78562, P35548, Q6UWB1, O75508, P23409, Q02962, P35609, P14138, P13942, Q9Y6X6, Q12951, P22303, O60882, P10916, O00526, Q9UGM1, P05107, P68133, P02144, Q16352, P50461, O96028, Q9UGM3, O43320, P25063, Q9NZG7, P02818, P02686, P47989, P21815, Q16568, Q02577, Q9Y576, Q5T4W7, P22607, P20929, P16871, P43699, Q96A32, P01127, P08842, P41161, Q13326, O96014, P30556, P30542, Q13153, P05111, O14613, Q16517, O94933, Q9UKI2, P63316, P08590, P01732, O14958, P32004, A1E959, P12821, P01286, Q99801, P08034, O60663, P18075, Q9BYG5, P12272, P35240, P56706, Q96L96, Q16671, Q13705, O96001, Q13424, P08151, P15692, P26678, P54845, P08631, P20702, P56178, Q9NP98, O15273, O75829, P37058, Q08289, Q13642, Q13467, P51114, Q8TBJ5, P06729, O75366, O14786, Q14254, P60953, O94907, P51843, Q13402, O60383, P04626, P51692, O75593, P11487, P08620, P50553, O75534, O75444, O95497, P68032, Q15303, P23760, O43248, P54762, Q9NP62, O15296, P43694, P49757, P35680, P05976, Q9UKW6, Q8NFI4

-- 4 of 1303--

GOID GO:0009605

TERM response to external stimulus

P-VALUE 3.57277782543774e-15

CORRECTED P-VALUE 4.65532950654538e-12

NUM\_ANNOTATIONS 59 (of 929)

ANNOTATED\_GENES P18428, P25025, P27918, P14138, P22303, P55011, P49238, P02775, P32246, P21730, P13501, P25105, Q9UGM1, P05107, P15692, P47992, O60603, P46092, O14931, P20800, P08910, P25063, Q14457, Q9NZG7, O15273, Q16568, P12259, P30874, Q5T4W7, Q99698, Q9BS40, Q15166, P01009, P04626, Q08334, P02679, P51692, P01127, P61278, P30273, P28039, O75923, Q16719, P43080, P30542, P30556, P06702, O95497, P35243, P18564, P05111, P78363, P48307, O00590, P43694, A0JLR9, P02763, P21462, P01286

-- 5 of 1303--

GOID GO:0006936

TERM muscle contraction

P-VALUE 3.93099370833758e-15

CORRECTED P-VALUE 5.12208480196386e-12

NUM\_ANNOTATIONS 27 (of 200)

ANNOTATED\_GENES P19237, P17661, P06753, P14138, P13805, P10916, P17540, Q9UHP9, O75923, Q13424, Q9UBF9, P68133, P20800, P02585, P12882, Q567P6, P45378, P52564, P63316, P08590, O15273, P48788, O14958, Q00872, P05976, O60662, P52179

-- 6 of 1303--

GOID GO:0048731

TERM system development

P-VALUE 8.29503068694918e-15

CORRECTED P-VALUE 1.08084249850948e-11

NUM\_ANNOTATIONS 108 (of 2497)

ANNOTATED\_GENES P78562, P35548, Q6UWB1, O75508, P23409, Q02962, P14138, P13942, Q9Y6X6, Q12951, P22303, O60882, P10916, Q9UGM1, P05107, P68133, P02144, Q16352, P50461, O43320, P25063, Q9NZG7, P02818, P02686, P21815, Q16568, Q02577, Q9Y576, Q5T4W7, P22607, P20929, P16871, P43699, Q96A32, P08842, P41161, Q13326, P30556, P30542, Q13153, P05111, Q16517, O94933, P63316, P08590, P01732, O14958, P32004, A1E959, P12821, P01286, Q99801, P08034, O60663, P18075, Q9BYG5, P12272, P35240, P56706, Q96L96, Q13705, O96001, Q13424, P08151, P15692, P26678, P54845, P08631, P20702,

P56178, Q9NP98, O15273, O75829, P37058, Q08289, Q13642, P51114, Q8TBJ5, P06729, O75366, O14786, Q14254, P60953, O94907, P51843, Q13402, P04626, P51692, O75593, P11487, P08620, P50553, O75534, O95497, O75444, P68032, Q15303, P23760, O43248, P54762, Q9NP62, O15296, P43694, P35680, P49757, P05976, Q9UKW6, Q8NFY4

-- 7 of 1303--

GOID GO:0003012

TERM muscle system process

P-VALUE 1.18776179886715e-14

CORRECTED P-VALUE 1.5476536239239e-11

NUM\_ANNOTATIONS 27 (of 209)

ANNOTATED\_GENES P19237, P17661, P06753, P14138, P13805, P10916, P17540, Q9UHP9, O75923, Q13424, Q9UBF9, P68133, P20800, P02585, P12882, Q567P6, P45378, P52564, P63316, P08590, O15273, P48788, O14958, Q00872, P05976, O60662, P52179

-- 8 of 1303--

GOID GO:0006941

TERM striated muscle contraction

P-VALUE 2.30887690325679e-14

CORRECTED P-VALUE 3.0084666049436e-11

NUM\_ANNOTATIONS 17 (of 70)

ANNOTATED\_GENES P19237, P13805, P10916, Q9UHP9, P02585, P12882, Q567P6, P45378, P52564, P08590, P63316, O15273, P48788, O14958, Q00872, O60662, P52179

-- 9 of 1303--

GOID GO:0003008

TERM system process

P-VALUE 2.78973817691129e-14

CORRECTED P-VALUE 3.63502884451541e-11

NUM\_ANNOTATIONS 83 (of 1701)

ANNOTATED\_GENES Q9Y6N9, P09758, O75508, Q02962, P46098, P14138, P13942, O15079, P22303, P55011, P10916, Q9UGM1, P68133, Q8TDN2, P50461, P12882, P02585, P31645, P25063, P02686, P43005, Q16568, Q9Y691, P31025, P53674, P06753, P22607, P29973, P13805, P47901, O60907, P49418, P16520, O75923, P30556, P35243, P78363, Q567P6, P52564, Q6W4X9, P63316, P08590, O14958, P48788, P30990, P53673, P05067, P12821, O43315, P10645, P35240, P21730, P17540, Q13424, Q9UHC6, P26678, P54845, P20800, O14931, P45378,

O15273, O15492, Q00872, P23297, Q16623, P19237, P17661, O60938, Q9BS40, Q13402, P04626, P61278, Q15761, P49407, Q9UHP9, P43080, Q9UBF9, P21579, P68032, P23760, P05976, O60662, P52179

-- 10 of 1303--

GOID GO:0048513

TERM organ development

P-VALUE 2.89591331620209e-14

CORRECTED P-VALUE 3.77337505101132e-11

NUM\_ANNOTATIONS 87 (of 1832)

ANNOTATED\_GENES P35548, P23409, Q02962, P13942, Q9Y6X6, Q12951, P22303, O60882, P10916, Q9UGM1, P05107, P68133, P02144, P50461, O43320, P25063, Q9NZG7, P02818, Q16568, Q9Y576, P20929, P16871, P43699, Q96A32, P08842, P41161, Q13326, P30556, Q13153, P05111, Q16517, P63316, P08590, P01732, O14958, A1E959, P12821, P01286, Q99801, O60663, P18075, P12272, P56706, Q96L96, Q13705, Q13424, P08151, P15692, P26678, P54845, P08631, P20702, P56178, Q9NP98, O15273, O75829, P37058, Q08289, Q13642, P51114, Q8TBJ5, P06729, Q14254, O14786, P60953, O94907, P51843, Q13402, P04626, P51692, O75593, P11487, P08620, P50553, O75534, O95497, O75444, P68032, Q15303, P23760, O43248, O15296, P43694, P35680, P49757, P05976, Q9UKW6

-- 11 of 1303--

GOID GO:0007275

TERM multicellular organismal development

P-VALUE 3.95814854225984e-14

CORRECTED P-VALUE 5.15746755056457e-11

NUM\_ANNOTATIONS 126 (of 3206)

ANNOTATED\_GENES P78562, Q13835, Q9Y508, P35548, Q6UWB1, O75508, P23409, Q02962, P14138, P13942, Q9Y6X6, P01258, Q12951, P22303, O60882, P10916, O00526, Q9UGM1, P05107, Q14641, P68133, P02144, Q16352, P50461, O43320, P25063, Q9NZG7, P02818, P02686, P21815, Q16568, Q02577, Q9Y576, Q5T4W7, P22607, P20929, P16871, P43699, Q96A32, P11684, P08842, P41161, Q13326, O96014, P30556, P30542, Q13153, P05111, Q16517, O15513, O94933, P63316, P01732, P08590, O14958, P32004, A1E959, Q05315, P12821, P01286, Q99801, P08034, O60663, P18075, Q9BYG5, P12272, P35240, P56706, Q96L96, P40205, Q16671, Q13705, O96001, Q13424, P08151, P15692, P08631, P26678, P54845, P20702, P56178, Q9NP98, O15273, O75829, P37058, Q08289, Q13642, Q13467, P51114, Q8TBJ5, P06729, O75366, O14786, Q14254, P60953, O94907, P51843, Q13402, O75474, P29762, P04626, P51692, O75593, P11487, Q13117, P08620, Q10588, Q9H3D4, P50553, O75534, O75444, O95497, P68032, Q15303,

P23760, O43248, P54762, Q9NP62, O15296, O00590, P43694, P49757, P35680, P05976, Q9UKW6, Q8NFY4

-- 12 of 1303--

GOID GO:0007267

TERM cell-cell signaling

P-VALUE 1.99587825638404e-11

CORRECTED P-VALUE 2.60062936806841e-08

NUM\_ANNOTATIONS 46 (of 758)

ANNOTATED\_GENES P78562, O75508, P46098, P14138, P12272, O15079, P22303, P56706, P32246, P13501, P51460, P08151, P05107, Q14641, P47992, Q9UHC6, O14931, P31645, O43320, P43490, P25063, P02686, P43005, Q92754, P20138, Q16568, Q16623, Q9Y691, P30874, O14786, P04626, P61278, P49418, P11487, P08620, Q15761, P00709, P30542, P21579, P06702, P32245, P05111, O43248, P43694, P01286, P08034

-- 13 of 1303--

GOID GO:0065008

TERM regulation of biological quality

P-VALUE 4.41413405150891e-11

CORRECTED P-VALUE 5.75161666911612e-08

NUM\_ANNOTATIONS 76 (of 1720)

ANNOTATED\_GENES Q96C11, Q9Y6N9, O75508, P14138, O15079, P01258, P22303, P55011, P32246, P11686, P10916, P32320, P13501, P05107, P02144, P50461, P31645, P25063, P02818, P02686, O15020, P47989, Q16568, P12259, Q9Y691, P22607, P20929, P47901, P16871, P01009, P02679, P01127, O43557, P50150, P11217, P16520, P30556, P05111, P78363, O14613, Q9UKI2, Q6W4X9, P63316, P08590, A0JLR9, P21802, P30990, P05067, P12821, P01286, O43315, P12272, P10645, P62753, P21730, P15692, P47992, P06133, P26678, P46092, Q13087, P20800, Q8NBQ5, Q13642, O75366, Q16623, O60383, P04626, P51692, P30273, P08620, Q9H3D4, Q14849, P21579, P32245, P48307

-- 14 of 1303--

GOID GO:0007154

TERM cell communication

P-VALUE 7.66668657636162e-11

CORRECTED P-VALUE 9.98969260899919e-08

NUM\_ANNOTATIONS 190 (of 6205)

ANNOTATED\_GENES P78562, P23497, Q14161, P09758, Q13387, P46098, O15079, P01258, P55011, P32246, P32320, P05107, Q14641, P25063, O75689,

P43005, Q16568, P20138, Q6DN90, Q9Y576, Q13304, P06748, P28908, P22607, O15117, Q6ZMJ9, P47901, P09681, O60907, Q15759, P49418, O43557, P30556, P30542, Q13153, Q92737, Q9UKI2, P52564, O94810, Q14449, P01732, A0JLR9, P08173, P05067, P21462, O15552, P25025, Q9UKJ1, P56706, P42336, Q16671, O96001, P51460, O00561, P29466, P47992, P25445, Q15172, Q9UHC6, P20800, Q13087, O00602, Q14457, O75829, Q8NC01, Q13467, P23297, P23443, O00635, Q92754, Q16623, P60953, Q13576, Q9UMR7, P51843, O94907, P29762, P04626, P30273, Q86WV1, O60726, Q15761, P50553, P43080, Q8N6C8, P21579, P06702, O00327, Q15303, O75901, P54762, O00590, Q14CE0, P52757, Q13835, P18428, Q14314, P35548, Q6UWB1, O75508, P48551, P14138, Q12860, P14784, P22303, Q14451, P04808, P13501, P25105, P26010, Q15111, Q13136, O60603, P31645, O43320, O75022, P02686, Q9NP99, O75343, Q9Y691, Q5T4W7, Q15418, P18031, P16871, P02679, P01127, Q05C50, P11684, P50150, O96014, P00709, P16520, P35243, P49685, P05111, P78356, P21554, P30990, P01286, P08034, P35219, P18075, P12272, O95243, O43914, Q17R89, P35240, P62753, P49238, Q7Z4W6, P11215, P21730, Q15208, Q13705, O95158, P08151, P15692, P46092, Q12918, Q13554, O14684, P20702, O14931, P43490, O15492, O00212, P06729, O95672, P30874, O14786, Q15120, Q6PK25, P11717, O75474, O60383, P13164, Q08334, P51692, O75593, P61278, P11487, P08620, Q9H3D4, P49407, P18564, P32245, O43248, Q9BZW8, P43694, P78348

-- 15 of 1303--

GOID GO:0006952

TERM defense response

P-VALUE 1.06414590052671e-10

CORRECTED P-VALUE 1.3865821083863e-07

NUM\_ANNOTATIONS 43 (of 712)

ANNOTATED\_GENES P18428, P23497, Q6UWB1, P25025, P27918, O43914, Q01523, P20592, P49238, P02775, P32246, P21730, P13501, P25105, P05107, O60603, O14931, Q9UGM3, O75022, P25063, Q14457, Q8NC01, O00160, Q13137, Q99698, Q9NP55, P01009, Q08334, P51692, P30273, P41218, P28039, P00709, Q16719, P30542, P30556, Q8N6C8, O95497, P06702, P18564, Q13488, P19878, P02763

-- 16 of 1303--

GOID GO:0051239

TERM &regulation of multicellular organismal process

P-VALUE 2.51334972413709e-10

CORRECTED P-VALUE 3.27489469055063e-07

NUM\_ANNOTATIONS 43 (of 732)

ANNOTATED\_GENES P18428, Q6UWB1, P18075, P14138, P12272, P01258, P22303, P56706, Q13705, P08151, P05107, O60603, P26678, P50461, O14931, P20800, P56178, P25063, O75829, P23297, P06729, Q16568, Q16623, Q9Y576, P17661, O14786, P28908, P13805, P16871, P04626, P51692, P01127, P30273, P30556, P50553, O95497, P32245, P05111, P08590, P43694, P63316, P12821, P01286

-- 17 of 1303--

GOID GO:0051239 & multicellular organismal process

TERM regulation of multicellular organismal process

P-VALUE 2.51334972413709e-10

CORRECTED P-VALUE 3.27489469055063e-07

NUM\_ANNOTATIONS 43 (of 732)

ANNOTATED\_GENES P18428, Q6UWB1, P18075, P14138, P12272, P01258, P22303, P56706, Q13705, P08151, P05107, O60603, P26678, P50461, O14931, P20800, P56178, P25063, O75829, P23297, P06729, Q16568, Q16623, Q9Y576, P17661, O14786, P28908, P13805, P16871, P04626, P51692, P01127, P30273, P30556, P50553, O95497, P32245, P05111, P08590, P43694, P63316, P12821, P01286

-- 18 of 1303--

GOID GO:0006935

TERM chemotaxis

P-VALUE 4.5721868808674e-10

CORRECTED P-VALUE 5.95755950577023e-07

NUM\_ANNOTATIONS 20 (of 179)

ANNOTATED\_GENES Q5T4W7, Q99698, P25025, P14138, P49238, P01127, P02775, P30273, P32246, P21730, P13501, P25105, P05107, P15692, P06702, P47992, P46092, P20800, O00590, P21462

-- 19 of 1303--

GOID GO:0042330

TERM taxis

P-VALUE 4.5721868808674e-10

CORRECTED P-VALUE 5.95755950577023e-07

NUM\_ANNOTATIONS 20 (of 179)

ANNOTATED\_GENES Q5T4W7, Q99698, P25025, P14138, P49238, P01127, P02775, P30273, P32246, P21730, P13501, P25105, P05107, P15692, P06702, P47992, P46092, P20800, O00590, P21462

-- 20 of 1303--

GOID GO:0050896

TERM response to stimulus

P-VALUE 9.68053032406941e-10

CORRECTED P-VALUE 1.26137310122624e-06

NUM\_ANNOTATIONS 138 (of 4213)

ANNOTATED\_GENES P31995, P23497, Q9Y6N9, P09758, P55011, P32246, P17066, P11678, P05107, Q8TDN2, P02144, P08910, P25063, Q9NZG7, Q16568, O00160, P06748, O15117, P47901, Q15759, P28039, O43557, P11217, Q16719, P30556, P30542, P52564, P01732, A0JLR9, P21462, Q14872, O75746, P25025, P27918, P49916, P02775, O96001, P47992, P25445, O00602, Q13087, P20800, Q14457, P09769, O15273, O15297, Q8NC01, Q8TBJ5, Q16623, Q9UMR7, P51843, O60938, Q15166, P04626, P30273, Q86WV1, Q10588, P43080, P21579, Q8N6C8, P06702, P48307, O00590, O43313, P18428, Q6UWB1, P48551, P14138, P20592, Q01523, P22303, O76096, P13501, Q15646, P25105, Q9UGM1, O60603, Q9UGM3, O43320, O75022, P02686, P23141, P47989, Q9NP99, P12259, Q02577, Q9Y691, P31025, Q13137, Q5T4W7, P29973, P16871, P01009, P02679, P01127, P00709, O75923, P35243, P78363, P05111, P56202, Q13488, P19878, P02763, P21554, P01286, P04435, O43315, O95243, O43914, P49238, P21730, P15692, P06133, P54845, P46092, O14931, O75366, P30874, Q99698, Q13402, Q9BS40, Q9NP55, P13164, Q08334, P51692, P41218, P61278, Q9H3D4, P49407, O75015, O95497, P18564, P32245, P43694, O15229, P78348, O75973

-- 21 of 1303--

GOID GO:0048518

TERM positive regulation of biological process

P-VALUE 2.68282597983596e-09

CORRECTED P-VALUE 3.49572225172626e-06

NUM\_ANNOTATIONS 74 (of 1814)

ANNOTATED\_GENES P18428, P23497, Q6UWB1, Q13387, P23409, Q02962, P14138, Q12951, P22303, P14784, P05107, O60603, P25063, Q16568, O00160, Q5T4W7, P28908, P16871, P43699, P01127, O43557, P41161, P00709, P30556, P30542, P05111, O14613, Q13488, P01732, P48788, P01286, Q14872, P25025, P27918, P18075, P12272, O95243, P35240, P62753, P56706, Q13705, P08151, P29466, P15692, P54845, P20800, O14931, P56178, P43490, Q14457, O00635, P06729, Q16623, O14786, P60953, Q99698, P04626, O75593, P51692, P30273, P61278, P08620, Q02930, O43272, Q12999, Q9H3D4, P50553, O95497, O75444, P32245, O00327, O15296, P43694, P35680

-- 22 of 1303--

GOID GO:0007155

TERM cell adhesion

P-VALUE 2.7669530296053e-09  
CORRECTED P-VALUE 3.60533979757571e-06  
NUM\_ANNOTATIONS 53 (of 1103)  
ANNOTATED\_GENES Q13835, O43529, Q14242, P18075, O75508, P35609,  
P13942, Q12860, P22303, P35240, P49238, P32246, P11215, P13501, P26010, P05107,  
O95832, Q13136, Q9UHC6, P20702, Q8WXI7, P25063, Q9NZG7, P02818, P56856,  
Q00872, P21815, Q4VB88, P20138, P06729, P12259, O00160, O14786, Q14254,  
P56750, Q9UMR7, A0T3F4, P04626, P51692, P08620, P14151, Q13421, P78369,  
O95497, P18564, P55289, O60245, P32004, Q13634, P05067, O95370, O75334,  
Q14031

-- 23 of 1303--

GOID GO:0022610  
TERM biological adhesion  
P-VALUE 2.7669530296053e-09  
CORRECTED P-VALUE 3.60533979757571e-06  
NUM\_ANNOTATIONS 53 (of 1103)  
ANNOTATED\_GENES Q13835, O43529, Q14242, P18075, O75508, P35609,  
P13942, Q12860, P22303, P35240, P49238, P32246, P11215, P13501, P26010, P05107,  
O95832, Q13136, Q9UHC6, P20702, Q8WXI7, P25063, Q9NZG7, P02818, P56856,  
Q00872, P21815, Q4VB88, P20138, P06729, P12259, O00160, O14786, Q14254,  
P56750, Q9UMR7, A0T3F4, P04626, P51692, P08620, P14151, Q13421, P78369,  
O95497, P18564, P55289, O60245, P32004, Q13634, P05067, O95370, O75334,  
Q14031

-- 24 of 1303--

GOID GO:0032103  
TERM positive regulation of response to external stimulus  
P-VALUE 2.82728715506479e-09  
CORRECTED P-VALUE 3.68395516304942e-06  
NUM\_ANNOTATIONS 11 (of 50)  
ANNOTATED\_GENES P15692, P18428, Q5T4W7, P14138, P20800, P51692,  
Q14457, P25063, P01127, P30273, P30556

-- 25 of 1303--

GOID GO:0007165  
TERM signal transduction  
P-VALUE 4.09022091649262e-09  
CORRECTED P-VALUE 5.32955785418989e-06  
NUM\_ANNOTATIONS 171 (of 5693)

ANNOTATED\_GENES P23497, Q14161, P09758, Q13387, P01258, P55011, P32246, P32320, P05107, Q14641, P25063, O75689, Q16568, P20138, Q6DN90, Q9Y576, Q13304, P06748, P28908, P22607, O15117, Q6ZMJ9, P47901, P09681, O60907, Q15759, O43557, P30556, P30542, Q13153, Q92737, Q9UKI2, P52564, O94810, Q14449, P01732, A0JLR9, P08173, P05067, P21462, O15552, P25025, Q9UKJ1, P56706, P42336, Q16671, O96001, O00561, P29466, P47992, P25445, Q15172, Q9UHC6, P20800, O00602, Q13087, O75829, Q8NC01, Q13467, P23297, P23443, O00635, P60953, Q13576, Q9UMR7, O94907, P51843, P29762, P04626, P30273, Q86WV1, O60726, Q15761, P50553, P43080, Q8N6C8, O00327, Q15303, O75901, P54762, O00590, Q14CE0, P52757, Q13835, Q14314, P35548, P18428, Q6UWB1, P48551, P14138, Q12860, P14784, Q14451, P13501, P04808, P25105, P26010, Q15111, Q13136, O60603, O43320, O75022, Q9NP99, O75343, Q5T4W7, Q15418, P18031, P16871, P02679, P01127, Q05C50, P11684, P50150, O96014, P00709, P16520, P35243, P49685, P05111, P78356, P21554, P30990, P01286, P35219, P18075, P12272, O95243, O43914, Q17R89, P35240, P49238, P62753, Q7Z4W6, P11215, P21730, Q15208, Q13705, O95158, P08151, P15692, P46092, Q12918, O14684, P20702, O14931, Q13554, P43490, O15492, O00212, P06729, O95672, P30874, O14786, Q15120, Q6PK25, P11717, O75474, O60383, P13164, Q08334, O75593, P51692, P61278, P11487, P08620, Q9H3D4, P49407, P18564, P32245, Q9BZW8, P78348

-- 26 of 1303--

GOID GO:0006950

TERM response to stress

P-VALUE 2.58418584067157e-08

CORRECTED P-VALUE 3.36719415039506e-05

NUM\_ANNOTATIONS 74 (of 1916)

ANNOTATED\_GENES P18428, P23497, Q6UWB1, Q01523, P20592, P22303, P55011, P32246, P17066, P13501, P11678, P25105, P05107, P02144, O60603, Q9UGM3, P08910, O75022, P25063, Q9NZG7, Q16568, P12259, O00160, Q13137, P06748, P47901, P01009, P02679, Q15759, P01127, P28039, P00709, P11217, O75923, Q16719, P30556, P30542, Q13488, P19878, P52564, A0JLR9, P02763, Q14872, O43315, P25025, P27918, O95243, O43914, P49916, P49238, P02775, P21730, P15692, Q13087, O14931, Q14457, O15273, Q8NC01, O75366, Q99698, P51843, Q9NP55, Q08334, P04626, P51692, P41218, P30273, Q8N6C8, O95497, P06702, P18564, P48307, O15229, O43313

-- 27 of 1303--

GOID GO:0008283

TERM cell proliferation

P-VALUE 2.96085496304181e-08  
CORRECTED P-VALUE 3.85799401684348e-05  
NUM\_ANNOTATIONS 51 (of 1118)  
ANNOTATED\_GENES P35548, P25025, P18075, P09758, P14138, P12272, Q9Y6X6, P22303, P35240, P02775, P08151, P05107, P15692, Q14641, O14931, P20800, P56178, P43490, P25063, Q14457, O15297, P20138, P30874, O14786, Q5T4W7, P06748, P28908, O75474, P04626, P13164, P51692, P01127, P61278, P11487, P08620, O43557, Q12999, P30556, P50553, P05111, P56277, Q13488, Q15303, O15296, P05413, P49757, P08173, P12821, Q9UKW6, P01286, Q99801

-- 28 of 1303--

GOID GO:0048522

TERM positive regulation of cellular process

P-VALUE 3.11373310095716e-08  
CORRECTED P-VALUE 4.05719423054717e-05

NUM\_ANNOTATIONS 66 (of 1636)  
ANNOTATED\_GENES P18428, P23497, P23409, Q02962, P14138, Q12951, P05107, O60603, P25063, Q16568, O00160, P28908, P16871, P43699, P01127, O43557, P41161, P00709, P30542, P05111, O14613, Q13488, P01732, P48788, P01286, Q14872, P25025, P18075, P12272, O95243, P62753, P35240, P56706, Q13705, P08151, P29466, P15692, P54845, P20800, O14931, P56178, Q14457, P43490, P06729, O00635, Q16623, O14786, P60953, Q99698, P04626, O75593, P51692, P30273, P61278, P08620, Q02930, O43272, Q12999, Q9H3D4, P50553, O95497, O75444, O00327, O15296, P43694, P35680

-- 29 of 1303--

GOID GO:0048869

TERM cellular developmental process

P-VALUE 3.84272992585196e-08  
CORRECTED P-VALUE 5.00707709338511e-05

NUM\_ANNOTATIONS 74 (of 1935)  
ANNOTATED\_GENES Q9Y508, P23409, Q02962, P35609, P14138, P22303, P10916, P27216, O00526, P05107, P68133, P02144, Q16352, P50461, Q9UGM3, P25063, P02818, P47989, Q16568, Q02577, Q5T4W7, P16871, P43699, P01127, Q13153, P05111, O14613, O94933, Q9UKI2, P01732, P32004, P12821, O60663, P18075, P12272, Q9BYG5, P35240, P56706, Q13705, Q13424, P08151, P15692, P54845, P56178, Q9NP98, O15273, O75829, Q13642, Q13467, Q08289, P51114, Q9NS25, Q8TBJ5, P06729, O14786, P60953, P51843, Q13402, O60383, P04626, P51692, P08620, Q13117, P11487, P50553, O95497, O75444, Q15303, P68032, O43248, O15296, Q9NP62, P49757, Q8NFY4

-- 30 of 1303--

GOID GO:0030154

TERM cell differentiation

P-VALUE 3.84732716178245e-08

CORRECTED P-VALUE 5.01306729180254e-05

NUM\_ANNOTATIONS 69 (of 1753)

ANNOTATED\_GENES Q9Y508, P23409, Q02962, P14138, P22303, P10916, P27216, O00526, P68133, P02144, Q16352, P50461, Q9UGM3, P25063, P02818, P47989, Q16568, Q02577, Q5T4W7, P16871, P43699, Q13153, P05111, O94933, P01732, P32004, P12821, O60663, P18075, P12272, Q9BYG5, P35240, P56706, Q13705, Q13424, P08151, P15692, P54845, P56178, Q9NP98, O15273, O75829, Q13642, Q13467, Q08289, P51114, Q9NS25, Q8TBJ5, P06729, O14786, P60953, P51843, Q13402, O60383, P04626, P51692, P08620, Q13117, P11487, P50553, O95497, O75444, Q15303, P68032, O43248, O15296, Q9NP62, P49757, Q8NIFY4

-- 31 of 1303--

GOID GO:0042221

TERM response to chemical stimulus

P-VALUE 4.01527205398829e-08

CORRECTED P-VALUE 5.23189948634675e-05

NUM\_ANNOTATIONS 45 (of 933)

ANNOTATED\_GENES P18428, O75746, P23497, P25025, O43315, P14138, Q01523, P49238, P02775, P32246, P17066, P21730, P13501, P11678, P25105, P05107, P15692, P47992, P06133, O60603, P46092, P20800, P25063, P23141, P47989, Q9Y691, P30874, Q13137, Q5T4W7, Q99698, P02679, P51692, P01127, P61278, P30273, P11217, Q16719, P21579, O95497, P06702, P32245, O00590, P43694, P21462, Q14872

-- 32 of 1303--

GOID GO:0007626

TERM locomotory behavior

P-VALUE 4.26390596971644e-08

CORRECTED P-VALUE 5.55586947854052e-05

NUM\_ANNOTATIONS 22 (of 279)

ANNOTATED\_GENES Q5T4W7, Q99698, P25025, P14138, P49238, P01127, P02775, P30273, P32246, P21730, P13501, P25105, P05107, P15692, P47992, P06702, P46092, P20800, O00590, P21462, O75973, Q8TBJ5

-- 33 of 1303--

GOID GO:0040011

TERM locomotion

P-VALUE 5.57827939452472e-08

CORRECTED P-VALUE 7.26849805106571e-05

NUM\_ANNOTATIONS 33 (of 576)

ANNOTATED\_GENES Q14242, O60663, P25025, Q9BYG5, P14138, P35240, P49238, P02775, P32246, P21730, P13501, P25105, P05107, P15692, P47992, P46092, P20800, P08910, P25063, O14786, O00160, Q99698, Q5T4W7, P43699, P30273, P61278, P01127, P50553, P06702, O00590, O15296, P12821, P21462

-- 34 of 1303--

GOID GO:0009611

TERM response to wounding

P-VALUE 6.236443890774e-08

CORRECTED P-VALUE 8.12608638967852e-05

NUM\_ANNOTATIONS 32 (of 550)

ANNOTATED\_GENES P18428, P25025, P27918, P22303, P49238, P32246, P13501, P25105, P05107, O60603, O14931, P08910, P25063, Q9NZG7, P12259, P01009, Q08334, P04626, P51692, P02679, P30273, P01127, P28039, P30542, P30556, O75923, O95497, P06702, P18564, P48307, A0JLR9, P02763

-- 35 of 1303--

GOID GO:0051704

TERM multi-organism process

P-VALUE 7.21455682192472e-08

CORRECTED P-VALUE 9.4005675389679e-05

NUM\_ANNOTATIONS 36 (of 671)

ANNOTATED\_GENES P18428, Q6UWB1, P27918, Q9UKJ1, P12272, P48551, Q01523, P20592, P01258, P14784, P02775, P04808, P13501, P25105, Q96D42, O95832, Q14641, P04090, Q99645, P08631, O60603, Q9UGM3, P25063, Q14457, P09769, Q02577, O00160, Q9H2J4, Q99698, P51692, P30273, P11684, P08842, P00709, P18564, O60506

-- 36 of 1303--

GOID GO:0009653

TERM anatomical structure morphogenesis

P-VALUE 7.38824823248211e-08

CORRECTED P-VALUE 9.6268874469242e-05

NUM\_ANNOTATIONS 60 (of 1461)

ANNOTATED\_GENES P35548, P18075, Q02962, P35609, Q9BYG5, P12272, Q12951, O60882, P56706, Q16671, P10916, O00526, Q9UGM1, P08151, P05107, P15692, P54845, P20702, P56178, O96028, Q9UGM3, O43320, P25063, Q9NZG7, P02818, O15273, O75829, P47989, Q13642, Q13467, Q8TBJ5, O14786, Q5T4W7, P60953, O94907, Q13402, O60383, P04626, P51692, P43699, P01127, P11487, P08620, P41161, O96014, Q13153, O14613, P68032, P23760, O94933, O43248, Q9UKI2, Q9NP62, O15296, P63316, P43694, P08590, P49757, A1E959, Q99801

-- 37 of 1303--

GOID GO:0007166

TERM cell surface receptor linked signal transduction

P-VALUE 7.63435649215677e-08

CORRECTED P-VALUE 9.94756650928028e-05

NUM\_ANNOTATIONS 94 (of 2731)

ANNOTATED\_GENES P18428, P35548, P23497, Q6UWB1, Q14161, P09758, Q13387, P14138, P48551, Q12860, P01258, P14784, P55011, P32246, Q14451, P32320, P25105, P26010, P05107, O60603, O75022, P25063, O75689, Q16568, Q13304, P22607, P47901, P18031, P16871, P01127, Q05C50, P50150, O96014, P16520, P30556, P30542, Q13153, P05111, P49685, O94810, P78356, P01732, P21554, P08173, P05067, P21462, P01286, O15552, P25025, P18075, P12272, P49238, P56706, Q7Z4W6, P11215, P21730, Q16671, Q13705, O95158, P08151, P15692, P46092, Q12918, P20800, P20702, O15492, O75829, Q8NC01, Q13467, P06729, O95672, P30874, O14786, Q9UMR7, O94907, Q6PK25, O75474, O60383, P13164, P04626, P51692, O75593, P61278, P30273, O60726, Q15761, Q9H3D4, P50553, P18564, P32245, Q15303, P54762, Q14CE0, O00590

-- 38 of 1303--

GOID GO:0003013

TERM circulatory system process

P-VALUE 1.20818529105729e-07

CORRECTED P-VALUE 0.000157426543424765

NUM\_ANNOTATIONS 20 (of 248)

ANNOTATED\_GENES Q9Y691, P17661, P14138, P47901, P10645, P10916, P16520, P30556, P26678, P50461, P68032, P20800, P52564, P63316, P08590, O15273, P30990, P12821, P23297, Q16568

-- 39 of 1303--

GOID GO:0008015

TERM blood circulation

P-VALUE 1.20818529105729e-07

CORRECTED P-VALUE 0.000157426543424765  
NUM\_ANNOTATIONS 20 (of 248)  
ANNOTATED\_GENES Q9Y691, P17661, P14138, P47901, P10645, P10916,  
P16520, P30556, P26678, P50461, P68032, P20800, P52564, P63316, P08590, O15273,  
P30990, P12821, P23297, Q16568

-- 40 of 1303--

GOID GO:0003015

TERM heart process

P-VALUE 1.35671668350365e-07

CORRECTED P-VALUE 0.000176780183860525

NUM\_ANNOTATIONS 12 (of 87)

ANNOTATED\_GENES P17661, P14138, P50461, P26678, P20800, P68032,  
P52564, P63316, P08590, O15273, P10916, P23297

-- 41 of 1303--

GOID GO:0060047

TERM heart contraction

P-VALUE 1.35671668350365e-07

CORRECTED P-VALUE 0.000176780183860525

NUM\_ANNOTATIONS 12 (of 87)

ANNOTATED\_GENES P17661, P14138, P50461, P26678, P20800, P68032,  
P52564, P63316, P08590, O15273, P10916, P23297

-- 42 of 1303--

GOID GO:0032101

TERM &regulation of response to external stimulus

P-VALUE 2.35046543400351e-07

CORRECTED P-VALUE 0.000306265646050657

NUM\_ANNOTATIONS 13 (of 109)

ANNOTATED\_GENES P15692, P18428, Q5T4W7, P14138, P20800, P51692,  
Q14457, P25063, P01127, P30273, P28039, Q16568, P30556

-- 43 of 1303--

GOID GO:0032101 & response to external stimulus

TERM regulation of response to external stimulus

P-VALUE 2.35046543400351e-07

CORRECTED P-VALUE 0.000306265646050657

NUM\_ANNOTATIONS 13 (of 109)

ANNOTATED\_GENES P15692, P18428, Q5T4W7, P14138, P20800, P51692, Q14457, P25063, P01127, P30273, P28039, Q16568, P30556

-- 44 of 1303--

GOID GO:0006968

TERM cellular defense response

P-VALUE 2.44393346194417e-07

CORRECTED P-VALUE 0.000318444530091326

NUM\_ANNOTATIONS 10 (of 60)

ANNOTATED\_GENES P18428, P25025, Q13488, O43914, P19878, P49238, Q14457, P41218, P21730, P13501

-- 45 of 1303--

GOID GO:0007517

TERM muscle development

P-VALUE 4.73915826354301e-07

CORRECTED P-VALUE 0.000617512321739654

NUM\_ANNOTATIONS 21 (of 295)

ANNOTATED\_GENES P23409, P20929, P04626, P22303, Q96A32, P10916, Q13326, Q13424, P68133, Q13153, P26678, P50461, P68032, Q9NP98, P63316, P08590, O15273, Q08289, P05976, Q13642, P51114

-- 46 of 1303--

GOID GO:0003009

TERM skeletal muscle contraction

P-VALUE 6.61140570979378e-07

CORRECTED P-VALUE 0.00086146616398613

NUM\_ANNOTATIONS 5 (of 10)

ANNOTATED\_GENES O15273, P48788, P13805, P02585, P45378

-- 47 of 1303--

GOID GO:0050900

TERM leukocyte migration

P-VALUE 7.1068512780431e-07

CORRECTED P-VALUE 0.000926022721529015

NUM\_ANNOTATIONS 10 (of 67)

ANNOTATED\_GENES P15692, Q14242, P06702, Q99698, P25025, P14138, P20800, P25063, P30273, P05107

-- 48 of 1303--

GOID GO:0019932

TERM second-messenger-mediated signaling

P-VALUE 1.00553100837436e-06

CORRECTED P-VALUE 0.00131020690391179

NUM\_ANNOTATIONS 21 (of 309)

ANNOTATED\_GENES P35219, P30874, P25025, P14138, P12272, P47901, P01258, P04626, P32246, P42336, P21730, P25105, P30556, P32245, P20800, O14931, P01732, P25063, P21554, P21462, P01286

-- 49 of 1303--

GOID GO:0007610

TERM behavior

P-VALUE 1.07773008793791e-06

CORRECTED P-VALUE 0.0014042823045831

NUM\_ANNOTATIONS 27 (of 476)

ANNOTATED\_GENES Q02577, Q5T4W7, Q99698, P25025, P14138, P49238, P01127, P02775, P30273, P32246, P21730, P13501, P25105, O96001, P05107, P15692, P47992, P06702, P32245, P46092, P20800, O00590, P21554, P21462, O75973, Q8TBJ5, Q16568

-- 50 of 1303--

GOID GO:0050793 & developmental process

TERM regulation of developmental process

P-VALUE 1.1899261353152e-06

CORRECTED P-VALUE 0.0015504737543157

NUM\_ANNOTATIONS 50 (of 1228)

ANNOTATED\_GENES P35548, Q6UWB1, O75414, P18075, Q13387, Q02962, P35609, O95243, P12272, P14784, P62753, P56706, Q13705, P08151, P05107, P15692, P29466, P25445, O60603, O14931, P56178, P25063, Q14457, O75829, P06729, Q16568, O14786, Q99698, P06748, P60953, P51843, P28908, P16871, P04626, P51692, P61278, P30273, P08620, O43272, O43557, Q9H3D4, P00709, P50553, P30542, O95497, P05111, O14613, O15296, Q9UKI2, P43694

-- 51 of 1303--

GOID GO:0048519

TERM negative regulation of biological process

P-VALUE 1.21312657818924e-06

CORRECTED P-VALUE 0.00158070393138058

NUM\_ANNOTATIONS 66 (of 1813)

ANNOTATED\_GENES P18428, P35548, P23497, Q6UWB1, Q13387, P23409, Q02962, Q9Y6X6, P01258, P22303, P14784, P06280, P10916, P32320, P13501, Q969G3, Q9UGM3, P08910, P25063, O15020, Q16568, P20138, O00160, Q9Y576, P06748, P28908, P13805, P16871, P01127, P28039, P50150, P05111, O94810, P05413, Q99801, O75414, P18075, P12272, P35240, P15692, P25445, Q9Y6E7, P26678, O14931, Q14457, O15492, O43240, O15297, O75829, O75366, O14786, P30874, P60953, P51843, O94907, P13164, P04626, O60383, O75593, P51692, P30273, P61278, P08620, Q9H3D4, O95497, O15296

-- 52 of 1303--

GOID GO:0050793

TERM regulation of developmental process

P-VALUE 1.24620745372695e-06

CORRECTED P-VALUE 0.00162380831220622

NUM\_ANNOTATIONS 50 (of 1230)

ANNOTATED\_GENES P35548, Q6UWB1, O75414, P18075, Q13387, Q02962, P35609, O95243, P12272, P14784, P62753, P56706, Q13705, P08151, P05107, P15692, P29466, P25445, O60603, O14931, P56178, P25063, Q14457, O75829, P06729, Q16568, O14786, Q99698, P06748, P60953, P51843, P28908, P16871, P04626, P51692, P61278, P30273, P08620, O43272, O43557, Q9H3D4, P00709, P50553, P30542, O95497, P05111, O14613, O15296, Q9UKI2, P43694

-- 53 of 1303--

GOID GO:0009887

TERM organ morphogenesis

P-VALUE 1.26312191553304e-06

CORRECTED P-VALUE 0.00164584785593955

NUM\_ANNOTATIONS 34 (of 693)

ANNOTATED\_GENES P35548, P18075, Q02962, P12272, Q12951, O60882, P56706, P10916, Q9UGM1, P08151, P05107, P15692, P54845, P20702, P56178, O43320, O15273, P02818, O75829, Q13642, O14786, Q13402, P04626, P43699, P08620, P11487, P41161, P68032, O43248, P23760, P43694, P08590, P63316, A1E959

-- 54 of 1303--

GOID GO:0042592

TERM homeostatic process

P-VALUE 2.31774629787825e-06

CORRECTED P-VALUE 0.00302002342613535

NUM\_ANNOTATIONS 40 (of 910)

ANNOTATED\_GENES Q96C11, O43315, Q9Y6N9, O75508, P12272, P01258, P55011, P62753, P32246, P21730, P11686, P13501, P47992, P02144, P26678, P50461, P46092, Q13087, P20800, P25063, P02818, P02686, P47989, Q16568, Q9Y691, P16871, P47901, P04626, P51692, P30273, P08620, O43557, P11217, P30556, P32245, P78363, P05111, Q6W4X9, P05067, P01286

-- 55 of 1303--

GOID GO:0042127

TERM regulation of cell proliferation

P-VALUE 2.78977237586683e-06

CORRECTED P-VALUE 0.00363507340575449

NUM\_ANNOTATIONS 35 (of 751)

ANNOTATED\_GENES P35548, P25025, P18075, P14138, P12272, Q9Y6X6, P35240, P08151, P15692, O14931, P20800, P56178, P43490, P25063, Q14457, O15297, P20138, P30874, O14786, P06748, P28908, P13164, P04626, P51692, P61278, P01127, P08620, Q12999, P30556, P05111, Q13488, O15296, P05413, P01286, Q99801

-- 56 of 1303--

GOID GO:0051707

TERM response to other organism

P-VALUE 2.9301246066957e-06

CORRECTED P-VALUE 0.0038179523625245

NUM\_ANNOTATIONS 18 (of 252)

ANNOTATED\_GENES O00160, P18428, Q6UWB1, Q99698, P27918, P48551, Q01523, P20592, P02775, P30273, P00709, P13501, P25105, O60603, Q9UGM3, P09769, Q14457, P25063

-- 57 of 1303--

GOID GO:0006928

TERM cell motion

P-VALUE 3.05697709856747e-06

CORRECTED P-VALUE 0.00398324115943341

NUM\_ANNOTATIONS 31 (of 626)

ANNOTATED\_GENES O00160, O14786, Q14242, P23497, Q5T4W7, P06753, Q99698, O60663, P25025, P18075, Q9BYG5, P14138, P04626, P35240, P43699, P01127, P61278, P30273, P13501, P50553, P05107, P15692, P06702, O95497, P20800, O15296, P08910, P25063, P21462, P12821, Q8TBJ5

-- 58 of 1303--

GOID GO:0051674

TERM localization of cell

P-VALUE 3.05697709856747e-06

CORRECTED P-VALUE 0.00398324115943341

NUM\_ANNOTATIONS 31 (of 626)

ANNOTATED\_GENES O00160, O14786, Q14242, P23497, Q5T4W7, P06753, Q99698, O60663, P25025, P18075, Q9BYG5, P14138, P04626, P35240, P43699, P01127, P61278, P30273, P13501, P50553, P05107, P15692, P06702, O95497, P20800, O15296, P08910, P25063, P21462, P12821, Q8TBJ5

-- 59 of 1303--

GOID GO:0042127 & cell proliferation

TERM regulation of cell proliferation

P-VALUE 3.72955811502731e-06

CORRECTED P-VALUE 0.00485961422388059

NUM\_ANNOTATIONS 33 (of 696)

ANNOTATED\_GENES P35548, P25025, P18075, P14138, P12272, Q9Y6X6, P35240, P08151, P15692, O14931, P20800, P56178, P43490, P25063, Q14457, O15297, P20138, O14786, P30874, P06748, P28908, P13164, P04626, P51692, P61278, P01127, P08620, Q12999, Q13488, O15296, P05413, P01286, Q99801

-- 60 of 1303--

GOID GO:0030855

TERM epithelial cell differentiation

P-VALUE 3.75453499463008e-06

CORRECTED P-VALUE 0.00489215909800299

NUM\_ANNOTATIONS 10 (of 80)

ANNOTATED\_GENES P18075, Q02962, P12272, P56178, Q9UGM3, O15296, P51692, P25063, P47989, O00526

-- 61 of 1303--

GOID GO:0006874

TERM cellular calcium ion homeostasis

P-VALUE 3.87483356726183e-06

CORRECTED P-VALUE 0.00504890813814217

NUM\_ANNOTATIONS 14 (of 161)

ANNOTATED\_GENES P47992, P50461, P26678, P46092, P47901, P20800, P01258, P25063, P32246, P21730, P13501, P01286, P11217, P30556

-- 62 of 1303--

GOID GO:0012501

TERM programmed cell death

P-VALUE 4.42153434449934e-06

CORRECTED P-VALUE 0.00576125925088264

NUM\_ANNOTATIONS 46 (of 1144)

ANNOTATED\_GENES P35548, P25025, O75414, P18075, Q13387, Q02962, P35609, O95243, P14784, P62753, P05107, P15692, P29466, P25445, Q9H832, O95470, O60603, O14931, Q13087, P25063, Q14457, P51114, P24855, P06729, Q9H2J4, Q99698, P06748, P20333, P28908, P16871, P51692, P61278, P30273, P08620, O43272, O43557, Q9H3D4, P00709, P30542, O95497, Q13153, P05111, P68032, P23760, O15296, P05067

-- 63 of 1303--

GOID GO:0002376

TERM immune system process

P-VALUE 4.80583066738324e-06

CORRECTED P-VALUE 0.00626199735960037

NUM\_ANNOTATIONS 63 (of 1775)

ANNOTATED\_GENES P31995, P04435, P18428, Q14242, P23497, Q6UWB1, P25025, O43315, P27918, P14138, O76096, P02775, P32246, P21730, P13501, P25105, Q15646, P05107, P15692, P47992, P25445, P02144, O60603, O14931, P20800, O00602, Q9UGM3, O75022, P25063, P02818, P02686, Q9NP99, Q16568, P06729, O00160, Q13137, Q99698, P60953, Q9UMR7, O15117, Q9NP55, P16871, P04626, Q08334, P51692, P30273, Q86WV1, P11487, Q10588, O43557, P14091, Q16719, O75015, Q8N6C8, P06702, O95497, P05111, P56202, P19878, O00590, P01732, P02763, P12821

-- 64 of 1303--

GOID GO:0055074

TERM calcium ion homeostasis

P-VALUE 4.8074373758376e-06

CORRECTED P-VALUE 0.00626409090071639

NUM\_ANNOTATIONS 14 (of 164)

ANNOTATED\_GENES P47992, P50461, P26678, P46092, P47901, P20800, P01258, P25063, P32246, P21730, P13501, P01286, P11217, P30556

-- 65 of 1303--

GOID GO:0048584

TERM positive regulation of response to stimulus

P-VALUE 5.11470496675438e-06

CORRECTED P-VALUE 0.00666446057168096  
NUM\_ANNOTATIONS 15 (of 188)  
ANNOTATED\_GENES P15692, P18428, Q6UWB1, Q5T4W7, P27918, P14138,  
O60603, O14931, P20800, P51692, Q14457, P25063, P01127, P30273, P30556

-- 66 of 1303--

GOID GO:0008219

TERM cell death

P-VALUE 7.53644107699816e-06

CORRECTED P-VALUE 0.00981998272332861

NUM\_ANNOTATIONS 47 (of 1204)

ANNOTATED\_GENES P35548, P25025, O75414, P18075, Q13387, Q02962,  
P35609, O95243, P14784, P62753, P05107, P15692, P29466, P25445, Q9H832,  
O95470, O60603, O14931, Q13087, P25063, Q14457, O15020, P51114, P24855,  
P06729, Q9H2J4, Q99698, P06748, P20333, P28908, P16871, P51692, P61278,  
P30273, P08620, O43272, O43557, Q9H3D4, P00709, P30542, O95497, Q13153,  
P05111, P68032, P23760, O15296, P05067

## *2. Genes whose correlation vectors in cancer and non-cancer are least correlated, $\rho_{i(s1,s2)} < 0.2$*

P-value cutoff 0.01

Calculate FDR Yes

Gene list Uploaded file Cor\_Tail.dat\_SwissProt.dat

Annotation file gene\_association.goa\_human

Evidence codes included IEA IEP IGI NAS IPI ND IC ISS NR RCA IDA IMP  
TAS

Unknown identifiers A2N4P8 A2RRB9 Q9H095 Q6NXU1 Q13659 Q59GH2  
Q6ZWH1 A2RRA7 Q05BM8 Q6IN92 A0PJW7 P04948 P03947 A0PJ71 P04948  
Q68CU4 Q5JR59 A0PK90 Q05DM8 A1L174 Q8WY49 Q19CC6 Q71RF0 Q6PJQ7  
O43466 Q68DZ4 Q05DM8 Q9P164 P03947 Q08E78 A1L3W4 Q5T1V4 Q6FHW4  
Q6PJD5 A2RRD1 Q7Z345 Q0VDJ6 P04948 Q2M389 Q8N9C1 Q0VGB5 Q8N7I0  
Q96CZ6 O60321 O14891 A2RRN1 Q24JS2 Q96GX3 A1L374 Q8IUQ3 Q0VGB5  
Q05DQ9 P04948 Q8IZW1 Q05DG5 A1L417 Q15810 Q6IA88 O95037 Q0D2Q4  
A0PJC9 A1L417 A1L417 Q6JIC5 A1L199 A0PJ82 Q5W9G7 Q05DH2 A0PK08  
Q05DH2 O95037 Q32NE2 Q6I9Z7 A0PJD1 P43363 Q05DF0 A0A4R1 A2VCL5  
A1JUI9 Q05CZ3 Q6ICC1 Q53EW6 Q96BX3 O75090 A0S0A6 Q12900 Q4ZG56  
Q1KSF7 Q2YDX2 Q6ITU8 Q3B7W8 A1L1B7 P04948 Q6PID8 A2RRB5 A1L429

Q5YKG5 A2RRD1 Q53GU1 A1L3W4 Q8TC04 Q8TCE6 P04948 Q6ZR23 Q59F66  
Q52LL3 Q05CY1 A2VCQ3 A1YLA1 O60498 A0N5G7 Q6P1K4 Q59EK2 Q6IA88  
Q6ZSI7 Q68VJ4 Q5JPP0 P03947 Q68VI9 Q96JS4 Q8IXM0 Q59GU8 Q9H053  
Q69YW5 Q9BSB4 P23630 Q6ZVZ4 Q0D2Q4 A1L389 Q504U0 A0JP19 Q5G0E1  
Q58F28 A0AV58 Q4W8W0 A0A4R1 Q6PIX0 Q9NUU6 Q9BUE6 Q6I9Z7 Q5D0K4  
Q4V9L5 O00547 A0A4R1 Q9P0N2 Q96I57 Q8TBU7 O94800 O00508 Q6ZSM6  
A1L1B5 Q68DB7 Q6ZWB7 A0AVE2 O75785 A0PJH6 A2RRE2 Q58A70 Q6IBU4  
Q8NDC0 Q49A36 Q59ED9 Q13732 A1A5C4 O94800 Q96MD3 A2N4P8 Q549M4  
A0PJN8 O94800 A0AVH1 A1L4G9 A0A4R1 Q1XBE0 Q53F40 P23630 Q59HE8  
Q8TCR4 Q53GU1 Q05D72 Q7Z6N2 Q8N9C1 A0JLT9 A2IBT1 Q49AE1 Q53GX9  
A0MWC9 Q9P0F3 Q6ZN02 A0A4Z1 Q53G98 A0JP04 Q4G137 A1A4H0 Q542Z6  
Q6L9J5 A0T1T0 Q546Y9 Q6MZY9 Q569H2 Q5I0G1 Q05BS8 Q86V25 A2RU15  
Q9BUN5 Q6UWK3 Q12900 Q5XKB6 A1L159 A2RU93 Q32Q70 Q0IIN7 Q566Q2  
Q6ZP15 A1L3A9 Q9H871 O94945 A2RTX1 A2VCQ7 Q3BBW2 Q68CU5 A0A4R1  
Q13067 Q2M3R2 Q59FY5 A2RRQ4 Q8IZW1 A0AVL2 Q5MY58 A1L429 Q8N3Z4  
A2VCQ7 A2RRP1 Q12966 Q05CY1 O43862 A2VCN1 A2RUE5 Q5ZEZ6 O75059  
Q4AEJ6 Q24JQ7 Q549N3 Q6FI91 Q05BX6 Q0IIN7 Q3BBW2 A2RU93 A0JLN5  
Q6TDC3 Q9P007 A1L381 Q6MZY3 Q6NUK0 A2RU51 Q59HH1 Q0VG09 Q499Z9  
Q68D71 Q9P164 A0PJN8 Q8N6T0 Q08AF4 A0PJN8 Q05C86 Q4VBP5 O95454  
A2RU93 A0RZB6 A1L172 Q6ICC1 Q8NI58 Q96IY7 Q6ZWH1 Q6P5R1 Q5YLC1  
Q86V69 A2RU55 Q5U0L9 Q05BX0 Q17RN0 A0JLS9 A2RRQ6 Q540G1 Q8N632  
Q05CP8 O00547 Q0IIN7 Q0VIA0 A1DZ74 A1YLA1 Q3KQX9 Q4G182 Q9HBI5  
Q53FL4 A1L147 Q53HM1 A1L469 Q53ZT9 Q5I0G1 A1L159 Q59GH8 Q2HXV1  
O43151 O95680 A2N8H4 O94981 Q08E72 Q9H5Z6 A0PJ75 Q53F25 Q53FS1  
A4FTW3 Q8NDC0 Q08AK5 Q5MJQ4 Q6ZTC9 Q68A20 Q59GL6 Q53FL4 O15026  
Q6ZRF1 Q53XI4 A0PJH3 Q7Z4L4 Q6IBT0 Q6P9E1 Q2HXV1 Q05D76 Q9HC03  
Q8NBS4 A1L0W6 Q7L551 Q8N325 O94909 Q49A36 Q59H02 Q7Z4X2 Q6ZUF3  
O94928 Q2NKK7 Q9Y2L2 Q8N896 Q15053 Q9HD34 Q9P0Q5 Q5ZEZ6 Q08E72  
Q69YR0 A0A4Z1 Q9BU22 A2RRQ4 Q6PJJ7 Q0IIN7 P84101 Q549N5 Q14783  
Q6FIE6 A0PJH3 Q59FF0 Q6MZY3 P06535 Q59FW8 P42975 Q6B0I8 P23630  
Q53F25 Q14138 P42975 Q8WYP8 Q53G27 Q05DM8 O60498 Q3KNS9 Q6ZUR0  
Q59F95 Q05DM8 A1L429 A2RRQ4 P06535 Q6ZWC9 O14634 A0A4R1 A0JNS3  
A2VCL5 A0JP04 Q561W3 A0JLR8 Q2HXV1 Q9H6P2 A2VCL5 Q5U000 Q53F49  
P23630 Q49AE1 Q6FIE3 Q53T26 Q2M1I4 Q546E0 A3KME8 Q15053 P06535  
O75168 Q14159 Q32N04 Q93073 A2RU51 Q3B778 A0PJM6 Q53H93 Q86W39  
Q587J7 Q8WV27 Q96IP9

Terms from the process ontology with p-value  $\leq 0.01$ .

The total number of genes used to calculate the background distribution of GO terms is 38594.

-- 1 of 1688--

GOID GO:0032502

TERM developmental process

P-VALUE 2.4117668424358e-20

CORRECTED P-VALUE 4.07106243003163e-17

NUM\_ANNOTATIONS 257 (of 4393)

ANNOTATED\_GENES P09211, Q02750, Q8IXS6, Q13530, Q13114, O15524, P00918, O00203, Q8NHU6, P01258, Q16706, O75411, P01215, Q00577, P05549, P78536, P32302, Q92736, O60238, P27216, O14944, P48552, Q08117, P12643, P25063, P21980, Q9NZG7, O95376, P16989, P13611, Q9ULZ3, Q16568, Q9Y576, Q13323, P06748, P22607, P28908, P49675, P17509, Q16643, Q9BPW9, O14617, Q9Y366, P12544, Q15583, P24522, P30556, Q07817, Q15389, P62330, Q13153, O14613, Q9UKI2, P41225, Q9NR12, P15313, O75581, P07949, Q16739, P14222, P05067, Q13164, Q02080, O75841, P20809, P50897, P23771, Q92630, Q16671, P06401, P63104, P02458, P20382, P21359, P31371, P15311, Q92765, Q8IXI2, P16157, P20719, P48431, P09466, Q13087, P78509, P84022, P04085, P20290, Q14457, P63146, P40425, Q9NS25, P11021, O43439, Q06413, P55317, O60931, P28845, P55061, P51178, P29762, O43353, Q13207, Q9Y3A2, Q15797, P22090, P63261, P28482, P20807, Q9UBN6, P01344, P17643, Q9UL15, O75444, P78362, P19429, P14625, Q15742, Q03060, O95613, Q99732, P10144, P50148, Q02297, P04156, P14210, O43597, Q9UI36, P07288, P40426, P55212, P35548, Q6UWB1, Q9NPG1, P10721, O94788, P12034, P22303, O60882, Q6ZV73, P19404, P23769, P51813, P16471, Q99967, Q8IWZ6, Q13275, P12757, Q02535, Q13972, Q15486, P02708, O00291, P24347, P42568, O00300, Q14116, O75385, O60902, Q01518, Q13075, Q14318, O95865, O43392, Q14106, Q01196, P05556, P11684, P53778, Q6X4U4, O14763, Q16621, O00560, P08842, P38936, P28907, P53675, P42858, P51649, Q14004, P52952, P43251, P27797, O00463, P36896, P16050, P16234, P35226, P14649, P42574, Q9BYG5, Q9Y2A4, Q12948, O00499, P17081, Q12830, Q04721, Q9UBY8, P62753, P19438, Q96L96, Q9Y657, P16860, O95238, P08069, P40763, P12829, O43903, Q9NRW4, O43847, Q53EL6, P55285, P11387, O15232, Q9H7Z6, Q14244, O14582, Q14254, Q99698, O94992, O95140, P31269, P54252, O75474, Q06945, P78344, Q5T230, P28289, P31260, P11487, Q06787, Q14119, Q9NPI5, P98194, Q93096, O00257, P60660, P35318, P50616, P29375, P14652, Q15828, P35222, O00425, O60879, P12644, P43694, Q07687, P80370, Q9UJW3, Q13277, P45379, Q9Y4C5, O00167, Q14142, P06576, Q16586, P49841

-- 2 of 1688--

GOID GO:0007275

TERM multicellular organismal development

P-VALUE 1.38361106397202e-14

CORRECTED P-VALUE 2.33553547598476e-11

NUM\_ANNOTATIONS 187 (of 3206)

ANNOTATED\_GENES P09211, Q02750, O00203, P01258, Q16706, O75411, P01215, Q00577, P05549, P78536, P32302, O14944, P48552, Q08117, P12643, P25063, P21980, Q9NZG7, O95376, P16989, P13611, Q16568, Q9Y576, P22607, P49675, P17509, Q16643, Q9Y366, Q15583, P30556, Q07817, Q15389, P62330, Q13153, P41225, Q9NR12, P15313, O75581, Q16739, P07949, Q13164, Q02080, P20809, P50897, Q16671, P06401, P02458, P20382, P21359, P31371, Q92765, P48431, P20719, P09466, P78509, P04085, P20290, P40425, Q06413, P55317, O60931, P28845, P51178, P29762, Q13207, Q9Y3A2, Q15797, P22090, P63261, P28482, P20807, P01344, O75444, P19429, Q15742, Q03060, P50148, Q02297, P14210, O43597, Q9UI36, P07288, P40426, P35548, Q6UWB1, Q9NPG1, P10721, O94788, P12034, P22303, O60882, P19404, P23769, P51813, P16471, Q99967, Q8IWZ6, Q13275, P12757, Q13972, Q02535, Q15486, P02708, P24347, P42568, O00300, Q14116, O75385, O60902, Q13075, Q14318, O43392, Q14106, Q01196, P05556, P11684, Q6X4U4, P53778, P08842, Q16621, P51649, P42858, Q14004, P52952, P43251, P27797, P36896, P16050, P14649, P35226, P16234, P42574, Q9BYG5, Q12948, O00499, Q12830, Q04721, Q9UBY8, Q96L96, Q9Y657, P16860, O95238, P08069, P40763, P12829, Q9NRW4, O43847, P55285, P11387, O15232, Q9H7Z6, O14582, Q14254, O94992, O95140, P31269, P54252, O75474, Q06945, Q5T230, P28289, P11487, P31260, Q06787, Q9NPI5, Q14119, Q93096, P98194, P60660, P35318, P50616, P29375, P14652, Q15828, O60879, P12644, P43694, Q07687, P80370, Q13277, Q9UJW3, P45379, Q9Y4C5, O00167, Q14142, P06576, Q16586

-- 3 of 1688--

GOID GO:0048856

TERM anatomical structure development

P-VALUE 1.67465281401639e-14

CORRECTED P-VALUE 2.82681395005967e-11

NUM\_ANNOTATIONS 170 (of 2822)

ANNOTATED\_GENES P09211, Q02750, Q8IXS6, P00918, O00203, Q16706, O75411, P01215, Q00577, P05549, P78536, P32302, O14944, P48552, Q08117, P12643, P25063, P21980, Q9NZG7, P16989, P13611, Q16568, Q9Y576, P22607, P49675, P17509, Q16643, Q9BPW9, Q9Y366, P30556, Q07817, Q15389, P62330, Q13153, O14613, Q9UKI2, P41225, Q9NR12, P15313, Q16739, P07949, Q13164, Q02080, O75841, P20809, P50897, P23771, Q16671, P06401, P02458, P31371,

P21359, P15311, Q92765, P16157, P48431, P20719, P63146, P40425, O43439, Q06413, P55317, O60931, P28845, P51178, Q13207, Q9Y3A2, Q15797, P63261, P28482, P20807, P01344, O75444, P19429, Q15742, O95613, P50148, Q02297, P14210, O43597, P07288, P35548, Q6UWB1, Q9NPG1, P10721, O94788, P12034, P22303, O60882, Q6ZV73, P19404, P23769, P51813, Q99967, Q8IWZ6, Q02535, Q13972, Q15486, P02708, O00300, Q14116, O75385, O60902, Q01518, Q13075, Q14318, O43392, Q14106, Q01196, P05556, Q6X4U4, P53778, P08842, O00560, P53675, P51649, P42858, P52952, P43251, P27797, P36896, P16050, P14649, P16234, P42574, Q9BYG5, Q12948, P17081, Q12830, Q04721, Q9UBY8, Q96L96, P16860, P08069, P40763, O43903, P12829, O43847, P55285, O15232, Q9H7Z6, Q14244, Q14254, O14582, O94992, O95140, P54252, Q06945, Q5T230, P28289, P11487, Q06787, Q9NPI5, Q14119, P98194, P60660, P35318, P50616, P14652, Q15828, P35222, O00425, P12644, P43694, Q07687, Q13277, P45379, O00167, P06576, Q16586

-- 4 of 1688--

GOID GO:0032501

TERM multicellular organismal process

P-VALUE 5.24141973756288e-14

CORRECTED P-VALUE 8.84751651700614e-11

NUM\_ANNOTATIONS 248 (of 4721)

ANNOTATED\_GENES P09211, P25929, Q02750, P09758, P46098, Q09013, P01241, O00203, P01258, Q16706, O75411, P01215, Q00577, P05549, P78536, P32302, Q92736, O14944, P48552, Q08117, P12643, P25063, P21980, Q9NZG7, O95376, P16989, P13611, Q9ULZ3, Q16568, Q14500, Q9Y576, P22607, P28908, P49675, P43007, P17509, P31323, Q16643, Q9Y366, O60907, P01160, Q14213, Q15583, P30556, Q07817, P52789, Q15389, P62330, Q13153, P30989, P41225, Q9NR12, P15313, O75581, P07949, Q16739, P23327, P05067, Q13164, Q02080, A2RRB4, P20809, P50897, P23771, P30047, Q13702, Q16671, P06401, O43511, P02458, P20382, P21359, P31371, Q92765, P20719, P48431, Q9UHC6, P09466, P13535, P78509, P84022, P04085, P20290, P40425, Q06413, P55317, O60931, P28845, P51178, P29762, Q13207, Q9Y3A2, Q15797, P22090, P63261, P28482, P20807, P01344, Q9Y623, O75444, P19429, Q15742, P10082, Q03060, Q06432, P50148, Q02297, P14210, O60765, O43597, Q9UI36, P07288, P40426, P35548, Q12797, Q6UWB1, Q9NPG1, Q01449, P10721, O94788, P12034, P22303, O60882, P19404, P55916, P23769, P51813, P16471, Q99967, Q8IWZ6, Q13275, P12757, P12235, Q02535, Q13972, Q15486, P02708, P24347, P42568, P30559, O00300, Q14116, P61106, O75385, O60902, Q7KZN9, Q13075, P01009, Q14318, O43392, Q14106, O60237, Q01196, P05556, P11684, Q6X4U4, P53778, Q16621, O00560, P08842, P10092, P42858, P51649, Q14004, P01189, P52952, P43251, P30990, P27797,

Q8WTS1, P36896, O43490, P16050, Q9H015, P16234, P35226, P14649, O95834, P42574, Q9BYG5, Q12948, O00499, Q12830, Q04721, Q9UBY8, Q96L96, Q9Y657, P16860, O95238, P08069, P40763, P32418, P12829, Q9NRW4, P01116, O43847, Q13884, Q13310, O15492, P41222, P35499, P55285, P11387, O15232, O75762, Q9H7Z6, O14582, Q14254, O94992, O95140, P31269, Q9BS40, P54252, O75474, Q06945, Q5T230, P28289, P31260, P11487, Q06787, Q14119, Q9NPI5, P98194, Q93096, P60660, P35318, Q00169, P50616, P29375, Q9GZR5, P14652, Q15828, O00425, O60879, P12644, P43694, Q07687, P80370, Q9UJW3, Q13277, Q14353, P45379, Q9Y4C5, O00167, Q13201, Q14142, P06576, Q16586

-- 5 of 1688--

GOID GO:0048513

TERM organ development

P-VALUE 7.9972254690005e-14

CORRECTED P-VALUE 1.34993165916728e-10

NUM\_ANNOTATIONS 123 (of 1832)

ANNOTATED\_GENES P07288, P35548, Q9NPG1, O94788, P10721, O00203, P22303, Q16706, O75411, P01215, O60882, P05549, P78536, P32302, P19404, P23769, P51813, Q99967, O14944, P48552, Q8IWZ6, Q08117, P12643, P25063, P21980, P02708, Q9NZG7, Q02535, P16989, P13611, O00300, Q14116, Q16568, O75385, Q9Y576, O60902, P17509, P49675, Q9Y366, Q14318, O43392, Q14106, Q01196, P05556, P53778, Q6X4U4, P08842, P30556, Q07817, Q15389, P62330, Q13153, P42858, P41225, P52952, P43251, Q16739, P07949, Q13164, Q02080, P36896, P16050, P16234, P14649, P42574, P20809, Q12948, P50897, Q12830, Q04721, Q9UBY8, Q96L96, P16860, P06401, P02458, P08069, P31371, P21359, P48431, P20719, P12829, O43847, P55285, Q9H7Z6, Q14254, Q06413, O94992, P55317, O60931, P28845, O95140, P51178, Q06945, Q13207, Q5T230, P28289, Q15797, P11487, Q14119, Q9NPI5, P63261, P28482, P98194, P20807, P60660, P01344, P35318, P14652, Q15828, O75444, P19429, Q15742, P12644, P43694, P50148, Q02297, Q07687, P45379, O00167, P06576, P14210, Q16586, O43597

-- 6 of 1688--

GOID GO:0048522

TERM positive regulation of cellular process

P-VALUE 7.42004158616035e-13

CORRECTED P-VALUE 1.25250301974387e-09

NUM\_ANNOTATIONS 111 (of 1636)

ANNOTATED\_GENES P55212, Q02750, P29692, Q13530, Q13114, O94788, P10721, P01241, O00203, O75411, Q00577, P78536, Q92736, O60238, P23769, Q99967, O14944, P48552, P42830, Q8WVQ1, P30279, P12643, P25063, P21980,

Q02535, O00291, O95648, Q14116, Q9ULZ3, Q16568, Q13323, P28908, P49675, P08651, Q9Y366, O43392, Q01196, P05556, Q9BZQ8, O14763, Q14213, Q16621, P38936, Q07817, P62330, P28907, O14613, O43734, P42858, Q14004, P52952, P27797, P56211, O00463, P36896, P18850, P16234, P35226, A2RRB4, Q969H8, P42574, P20809, Q9Y2A4, Q12948, P50897, P18848, Q12830, Q04721, Q92630, P19438, P62753, P62070, P08069, P31371, P21359, P48431, O43847, P84022, P04085, Q14457, P43490, P40425, Q9H7Z6, Q9H2K8, Q99698, Q06413, P55317, Q06945, O43353, Q13207, Q5T230, Q9Y3A2, Q15797, Q02930, P28482, P98194, Q93096, P35318, P29375, O75444, P35222, O00327, Q99732, O60244, Q5SW96, P12644, Q9GZP9, P43694, P15514, Q02297, Q07687

-- 7 of 1688--

GOID GO:0048518

TERM positive regulation of biological process

P-VALUE 9.8784267584329e-13

CORRECTED P-VALUE 1.66747843682347e-09

NUM\_ANNOTATIONS 119 (of 1814)

ANNOTATED\_GENES P55212, Q02750, Q6UWB1, P29692, Q13530, Q13114, O94788, P10721, P01241, O00203, P22303, O75411, Q00577, P78536, Q92736, O60238, P23769, Q99967, O14944, P48552, P42830, Q8WVQ1, P30279, P12643, P25063, P21980, Q02535, P16989, O00291, O95648, Q14116, Q9ULZ3, Q16568, Q13323, P28908, P49675, P08651, Q9Y366, O43392, Q14106, Q01196, P05556, Q9BZQ8, O14763, Q14213, Q16621, P38936, P30556, Q07817, P62330, P28907, O14613, O43734, P42858, Q14004, P52952, P27797, P56211, O00463, P36896, P18850, P16234, P35226, A2RRB4, P42574, Q969H8, Q9Y2A4, P20809, Q12948, P50897, P18848, Q12830, Q04721, Q92630, P62753, P19438, P62070, P08069, O95292, P31371, P21359, P48431, O43847, P84022, P04085, Q14457, P43490, P40425, Q9H7Z6, Q9H2K8, Q99698, Q06413, P55317, Q06945, O43353, Q13207, Q5T230, Q9Y3A2, Q15797, Q02930, P28482, P98194, Q93096, P35318, P08174, P29375, O75444, P35222, O00327, Q99732, O60244, Q5SW96, P12644, Q9GZP9, P43694, P15514, Q02297, Q07687, P49841

-- 8 of 1688--

GOID GO:0048519

TERM negative regulation of biological process

P-VALUE 2.07406280848663e-12

CORRECTED P-VALUE 3.50101802072543e-09

NUM\_ANNOTATIONS 118 (of 1813)

ANNOTATED\_GENES P07288, P09211, P35548, Q10571, Q6UWB1, Q96RU8, O15524, Q9H307, P22303, P01258, Q9ULR5, P01215, P27816, Q00577, P78536,

O60238, P56545, P32320, P06280, P16471, Q99967, O14944, P48552, P12643, P25063, P08910, Q02535, P16989, Q14201, O00300, Q9ULZ3, Q16568, P98179, O75385, Q9Y576, P06748, P28908, Q13075, P49675, P08651, O95865, Q01082, Q96KC8, Q14106, P05556, Q9BZQ8, Q6X4U4, O15204, Q15583, O14683, P38936, Q07817, P62330, P52952, P27797, P24593, P36896, P42574, P20809, Q12948, O00499, P50897, Q12830, Q04721, Q9UBY8, P30047, P16860, P63104, P08069, P40763, P17028, O75563, P31371, P21359, Q92765, Q01638, P48431, P84022, P04085, Q14457, O15492, Q53EL6, Q9H7Z6, P11021, Q9H2K8, O43439, Q06413, O94992, O95140, P55061, Q06945, Q13207, Q15797, O95751, Q9NPI5, P28482, Q9UBN6, O00257, P35318, P50616, P11277, P35222, P14625, Q15742, O00425, O14921, P12644, P14373, Q02297, Q07687, P51161, P04156, Q08999, P06576, P48230, P14210, P22460, P49841

-- 9 of 1688--

GOID GO:0050793 & developmental process

TERM regulation of developmental process

P-VALUE 2.08860111725602e-12

CORRECTED P-VALUE 3.52555868592816e-09

NUM\_ANNOTATIONS 90 (of 1228)

ANNOTATED\_GENES P07288, P09211, P35548, P55212, Q02750, Q6UWB1, Q8IXS6, Q13530, Q13114, O00203, O75411, Q92736, O60238, Q6ZV73, P23769, P16471, Q99967, O14944, P12643, P25063, P21980, Q02535, P16989, O00291, O00300, Q9ULZ3, Q16568, O75385, Q13323, P06748, P28908, Q13075, P49675, O95865, Q14106, Q01196, P05556, O14763, P38936, Q07817, P28907, O14613, P42858, Q9UKI2, P52952, P27797, O00463, P36896, P42574, Q9Y2A4, Q12948, P50897, P17081, Q04721, Q92630, Q9UBY8, P62753, P16860, P63104, P08069, P31371, P21359, P15311, P48431, O43903, P84022, Q14457, P11021, Q99698, Q06413, P55061, Q06945, O43353, Q9Y3A2, Q15797, Q9NPI5, P28482, Q9UBN6, O00257, P50616, P14625, Q15742, P12644, P43694, P50148, Q02297, Q07687, P04156, P14210, P49841

-- 10 of 1688--

GOID GO:0050793

TERM & regulation of developmental process

P-VALUE 2.28244287174014e-12

CORRECTED P-VALUE 3.85276356749736e-09

NUM\_ANNOTATIONS 90 (of 1230)

ANNOTATED\_GENES P07288, P09211, P35548, P55212, Q02750, Q6UWB1, Q8IXS6, Q13530, Q13114, O00203, O75411, Q92736, O60238, Q6ZV73, P23769, P16471, Q99967, O14944, P12643, P25063, P21980, Q02535, P16989, O00291,

O00300, Q9ULZ3, Q16568, O75385, Q13323, P06748, P28908, Q13075, P49675, O95865, Q14106, Q01196, P05556, O14763, P38936, Q07817, P28907, O14613, P42858, Q9UKI2, P52952, P27797, O00463, P36896, P42574, Q9Y2A4, Q12948, P50897, P17081, Q04721, Q92630, Q9UBY8, P62753, P16860, P63104, P08069, P31371, P21359, P15311, P48431, O43903, P84022, Q14457, P11021, Q99698, Q06413, P55061, Q06945, O43353, Q9Y3A2, Q15797, Q9NPI5, P28482, Q9UBN6, O00257, P50616, P14625, Q15742, P12644, P43694, P50148, Q02297, Q07687, P04156, P14210, P49841

-- 11 of 1688--

GOID GO:0048731

TERM system development

P-VALUE 7.02487939095495e-12

CORRECTED P-VALUE 1.1857996411932e-08

NUM\_ANNOTATIONS 147 (of 2497)

ANNOTATED\_GENES P09211, Q02750, O00203, Q16706, O75411, P01215, Q00577, P05549, P78536, P32302, O14944, P48552, Q08117, P12643, P25063, P21980, Q9NZG7, P16989, P13611, Q16568, Q9Y576, P22607, P17509, P49675, Q16643, Q9Y366, P30556, Q07817, Q15389, P62330, Q13153, P41225, Q9NR12, P15313, Q16739, P07949, Q13164, Q02080, P20809, P50897, P06401, P02458, P31371, P21359, Q92765, P48431, P20719, Q06413, P55317, O60931, P28845, P51178, Q13207, Q9Y3A2, Q15797, P63261, P28482, P20807, P01344, O75444, P19429, Q15742, P50148, Q02297, P14210, O43597, P07288, P35548, Q6UWB1, Q9NPG1, P10721, O94788, P12034, P22303, O60882, P23769, P19404, P51813, Q99967, Q8IWZ6, Q13972, Q02535, Q15486, P02708, O00300, Q14116, O75385, O60902, Q13075, O43392, Q14318, Q14106, Q01196, P05556, Q6X4U4, P53778, P08842, P51649, P42858, P52952, P43251, P27797, P36896, P16050, P14649, P16234, P42574, Q9BYG5, Q12948, Q12830, Q04721, Q9UBY8, Q96L96, P16860, P08069, P40763, P12829, O43847, P55285, O15232, Q9H7Z6, Q14254, O14582, O94992, O95140, P54252, Q06945, Q5T230, P28289, P11487, Q06787, Q9NPI5, Q14119, P98194, P60660, P35318, P50616, P14652, Q15828, P12644, P43694, Q07687, Q13277, P45379, P06576, O00167, Q16586

-- 12 of 1688--

GOID GO:0048523

TERM negative regulation of cellular process

P-VALUE 1.547633225209e-11

CORRECTED P-VALUE 2.6124048841528e-08

NUM\_ANNOTATIONS 109 (of 1675)

ANNOTATED\_GENES P09211, P35548, Q10571, Q96RU8, O15524, Q9H307, P22303, P01258, Q9ULR5, P27816, Q00577, O60238, P56545, P32320, P06280, P16471, Q99967, O14944, P48552, P12643, P25063, P08910, Q02535, P16989, Q14201, Q9ULZ3, Q16568, O75385, Q9Y576, P06748, P28908, Q13075, P49675, P08651, O95865, Q01082, Q96KC8, Q14106, P05556, Q9BZQ8, Q6X4U4, O15204, Q15583, O14683, P38936, Q07817, P62330, P52952, P27797, P24593, P36896, P42574, P20809, Q12948, O00499, P50897, Q12830, Q04721, Q9UBY8, P16860, P63104, P08069, P40763, P17028, O75563, P31371, P21359, Q92765, Q01638, P48431, P04085, P84022, Q14457, O15492, Q53EL6, Q9H7Z6, P11021, Q9H2K8, O43439, Q06413, O94992, O95140, P55061, Q06945, Q13207, Q15797, O95751, Q9NPI5, P28482, Q9UBN6, O00257, P50616, P11277, P35222, P14625, Q15742, O00425, O14921, P12644, P14373, Q02297, Q07687, P51161, P04156, Q08999, P06576, P48230, P14210, P49841

-- 13 of 1688--

GOID GO:0008283

TERM cell proliferation

P-VALUE 4.83295217835587e-11

CORRECTED P-VALUE 8.15802327706471e-08

NUM\_ANNOTATIONS 81 (of 1118)

ANNOTATED\_GENES P35548, Q02750, Q96RU8, P09758, Q9NPG1, O94788, P10721, P12034, P22303, Q14542, O75411, Q00577, P78536, P56545, O14944, P42830, P30279, P12643, P25063, P21980, Q13972, Q14201, P40818, Q14116, P06748, P28908, Q14106, P05556, Q14213, O14683, P38936, P30556, Q07817, P28907, Q14004, P52952, P27797, O00463, P24593, P35226, P16234, Q969H8, P42574, P20809, Q9UQV4, Q12948, O00499, Q04721, P06401, P08069, P31371, P21359, O75563, Q9NRW4, O43847, P04085, Q14457, P43490, P40238, O95140, O75474, Q06945, P30260, Q13207, O43353, P11487, O95751, Q15797, P01344, P35318, P50616, P56277, Q15742, P10082, P12644, P15514, Q9GZP9, P14373, P51161, P48230, P14210

-- 14 of 1688--

GOID GO:0006091

TERM generation of precursor metabolites and energy

P-VALUE 6.44444393109005e-10

CORRECTED P-VALUE 1.087822135568e-06

NUM\_ANNOTATIONS 48 (of 537)

ANNOTATED\_GENES P35573, O75746, O75390, P62140, Q92630, P21281, O15342, P06737, P13807, Q15067, O95169, P19404, P14927, Q13423, Q93100, P19367, P12235, P46976, P48735, P47985, O75251, P00403, Q00325, P50213,

Q7KZN9, O15239, P30049, Q13011, O00483, P56385, O95167, Q06055, O75964, P35754, P52789, P30613, P17174, P51649, O95278, P01189, P10109, P15313, O95685, P15954, P06576, Q16821, P13073, P49841

-- 15 of 1688--

GOID GO:0012501

TERM programmed cell death

P-VALUE 7.83320806147626e-10

CORRECTED P-VALUE 1.32224552077719e-06

NUM\_ANNOTATIONS 79 (of 1144)

ANNOTATED\_GENES P09211, P35548, P55212, Q13530, Q13114, O75411, P78536, Q92736, O60238, P16471, Q99967, P25063, P21980, Q02535, O00291, P16989, O00300, Q9ULZ3, Q13323, P06748, P28908, Q13075, P49675, Q14318, O95865, P12544, O14763, P38936, P24522, Q07817, P62330, P28907, Q13153, P42858, P52952, P14222, P27797, P05067, Q13164, O00463, P36896, P42574, Q9Y2A4, Q12948, P50897, Q04721, Q92630, Q9UBY8, P19438, P62753, P63104, P08069, P21359, O43903, Q8IXI2, Q9NRW4, Q13087, P84022, Q14457, Q53EL6, P11387, P11021, Q06413, Q99698, P55061, Q06945, O43353, Q9Y3A2, Q9UBN6, O00257, P28482, Q9UL15, P14625, P10144, Q99732, P04156, O00167, P14210, P49841

-- 16 of 1688--

GOID GO:0006915

TERM apoptosis

P-VALUE 1.24899256398491e-09

CORRECTED P-VALUE 2.10829944800652e-06

NUM\_ANNOTATIONS 78 (of 1135)

ANNOTATED\_GENES P09211, P35548, P55212, Q13530, Q13114, O75411, P78536, Q92736, O60238, P16471, Q99967, P25063, P21980, Q02535, O00291, P16989, O00300, Q9ULZ3, Q13323, P06748, P28908, Q13075, P49675, Q14318, O95865, P12544, O14763, P38936, P24522, Q07817, P62330, P28907, Q13153, P42858, P52952, P14222, P27797, P05067, Q13164, O00463, P36896, P42574, Q9Y2A4, Q12948, P50897, Q04721, Q92630, Q9UBY8, P19438, P62753, P63104, P08069, P21359, O43903, Q8IXI2, Q9NRW4, Q13087, P84022, Q14457, Q53EL6, P11021, Q06413, Q99698, P55061, Q06945, O43353, Q9Y3A2, Q9UBN6, O00257, P28482, Q9UL15, P14625, P10144, Q99732, P04156, O00167, P14210, P49841

-- 17 of 1688--

GOID GO:0009653

TERM anatomical structure morphogenesis

P-VALUE 1.57797009247196e-09  
CORRECTED P-VALUE 2.66361351609268e-06  
NUM\_ANNOTATIONS 93 (of 1461)  
ANNOTATED\_GENES P07288, P35548, Q8IXS6, Q9NPG1, O94788, P00918, Q16706, O60882, Q6ZV73, P23769, Q99967, O14944, Q8IWZ6, Q08117, P12643, P25063, P21980, Q9NZG7, Q02535, Q13972, O00300, Q14116, O75385, P17509, Q01518, Q16643, Q9BPW9, Q9Y366, O43392, Q01196, Q6X4U4, O00560, Q15389, P62330, Q13153, O14613, P53675, P42858, Q9UKI2, P41225, P52952, P07949, Q13164, P16234, O75841, Q9BYG5, Q12948, P23771, P17081, Q04721, P16860, Q16671, P06401, P02458, P08069, P31371, P21359, P15311, P48431, P20719, O43903, P16157, P63146, P40425, Q14244, O43439, Q06413, P55317, O95140, P51178, Q13207, Q15797, P11487, Q14119, P28482, P01344, P14652, Q15828, P19429, P35222, Q15742, O95613, O00425, P12644, P43694, P50148, Q07687, Q13277, P45379, O00167, P06576, P14210, O43597

-- 18 of 1688--

GOID GO:0008219

TERM cell death

P-VALUE 1.58538039252946e-09  
CORRECTED P-VALUE 2.67612210258972e-06  
NUM\_ANNOTATIONS 81 (of 1204)  
ANNOTATED\_GENES P09211, P35548, P55212, Q13530, Q13114, O75411, P78536, Q92736, O60238, P16471, Q99967, P25063, P21980, Q02535, O00291, P16989, O00300, Q9ULZ3, Q13323, P06748, P28908, Q13075, P49675, Q14318, O95865, P12544, O14763, P38936, P24522, Q07817, P62330, P28907, Q13153, P42858, P52952, P14222, P27797, P05067, Q13164, O00463, P36896, P42574, Q9Y2A4, Q12948, P50897, Q04721, Q92630, Q9UBY8, P19438, P62753, P63104, P08069, P21359, O43903, Q8IXI2, Q9NRW4, Q13087, P84022, Q14457, Q53EL6, P11387, P11021, Q06413, Q99698, P55061, P54252, Q06945, P78344, O43353, Q9Y3A2, Q9UBN6, O00257, P28482, Q9UL15, P14625, P10144, Q99732, P04156, O00167, P14210, P49841

-- 19 of 1688--

GOID GO:0016265

TERM death

P-VALUE 1.84374361970479e-09  
CORRECTED P-VALUE 3.11223923006169e-06  
NUM\_ANNOTATIONS 81 (of 1208)  
ANNOTATED\_GENES P09211, P35548, P55212, Q13530, Q13114, O75411, P78536, Q92736, O60238, P16471, Q99967, P25063, P21980, Q02535, O00291,

P16989, O00300, Q9ULZ3, Q13323, P06748, P28908, Q13075, P49675, Q14318, O95865, P12544, O14763, P38936, P24522, Q07817, P62330, P28907, Q13153, P42858, P52952, P14222, P27797, P05067, Q13164, O00463, P36896, P42574, Q9Y2A4, Q12948, P50897, Q04721, Q92630, Q9UBY8, P19438, P62753, P63104, P08069, P21359, O43903, Q8IXI2, Q9NRW4, Q13087, P84022, Q14457, Q53EL6, P11387, P11021, Q06413, Q99698, P55061, P54252, Q06945, P78344, O43353, Q9Y3A2, Q9UBN6, O00257, P28482, Q9UL15, P14625, P10144, Q99732, P04156, O00167, P14210, P49841

-- 20 of 1688--

GOID GO:0051093

TERM negative regulation of developmental process

P-VALUE 1.90259297006775e-09

CORRECTED P-VALUE 3.21157693347436e-06

NUM\_ANNOTATIONS 48 (of 555)

ANNOTATED\_GENES P07288, P09211, P35548, P42574, Q12948, P50897, Q04721, Q9UBY8, O60238, P16860, P63104, P08069, P16471, Q99967, P21359, O14944, P48431, Q14457, P25063, P16989, O00300, P11021, Q16568, O75385, Q06413, P06748, P55061, P49675, Q13075, O95865, Q06945, Q14106, P05556, Q9NPI5, P28482, Q9UBN6, O00257, P38936, P50616, Q07817, P14625, P12644, P52952, Q07687, P04156, P27797, P14210, P49841

-- 21 of 1688--

GOID GO:0007507

TERM heart development

P-VALUE 2.56015149263617e-09

CORRECTED P-VALUE 4.32153571956986e-06

NUM\_ANNOTATIONS 28 (of 227)

ANNOTATED\_GENES P35548, Q06413, O94992, O60902, P42574, Q12948, O94788, Q9Y366, Q06945, Q13207, Q96L96, P05556, P35318, P19404, P19429, P31371, P21359, Q99967, Q8IWZ6, P12644, P12643, P52952, P43694, P50148, Q02297, Q02535, P45379, P13611

-- 22 of 1688--

GOID GO:0009887

TERM organ morphogenesis

P-VALUE 7.46309587596074e-09

CORRECTED P-VALUE 1.25977058386217e-05

NUM\_ANNOTATIONS 54 (of 693)

ANNOTATED\_GENES P07288, P16234, P35548, Q9NPG1, Q12948, O94788, Q04721, Q16706, O60882, P16860, P02458, P23769, P08069, Q99967, P21359, P31371, O14944, Q8IWZ6, P20719, P48431, Q08117, P12643, P21980, O00300, Q14116, Q06413, O95140, P17509, P51178, Q9Y366, O43392, Q13207, Q01196, P11487, Q14119, Q6X4U4, P28482, P01344, P14652, P62330, Q15389, P19429, Q15742, P42858, P41225, P12644, P52952, P43694, Q07687, P45379, Q13164, P06576, P14210, O43597

-- 23 of 1688--

GOID GO:XXXXXXX

TERM unannotated

P-VALUE 1.81075377546647e-08

CORRECTED P-VALUE 3.0565523729874e-05

NUM\_ANNOTATIONS 468 (of 11418)

ANNOTATED\_GENES Q6FIE3, A0PJ82, A1L389, O14643, A0AV96, Q4VBP5, Q8WY49, O94928, A1L172, A0RZB6, P35268, Q8NBV9, Q6IBU4, Q68DZ4, O60308, P80723, Q6UWK3, Q68CU4, Q8TAX7, Q9BUB7, O75391, Q53EW6, Q7Z4X2, P24311, Q561W3, Q6IN92, O14950, Q8TE69, A1A4H0, A0JLS9, Q9P007, Q9P164, Q7Z585, Q9BU22, Q3KQX9, Q9HD34, Q8N3Z4, Q58A70, Q8IUQ3, Q14159, Q8TB73, Q86W39, P20674, P62079, A0PJ75, Q53F39, O94800, Q93073, O95454, Q86V25, A0PK90, Q14DL9, Q59H02, P43363, Q9UJ78, A2RRD1, P55259, A0AVE2, Q7Z570, Q86XZ4, Q08AF4, P11234, P84101, Q3BBV0, Q14247, A2IBT1, A0PJH6, O43151, Q0D2Q4, Q49A36, Q69YR0, A2RRN1, Q8NDC0, Q92901, A1L159, Q8TDJ6, A0JP19, Q8IZQ1, Q6ZWC9, Q8N6T0, A1JUI9, A2N8H4, Q6FI91, A2RRB5, Q59EK2, Q68DB7, A2RRQ4, Q6ZN02, Q9NVM1, Q59GU8, Q8IXT5, Q96GC9, O60296, Q6FIE6, Q7L551, Q24JQ7, Q59GV9, Q9BU79, Q5JY77, A2RRA7, Q549N5, O94981, Q5SRI9, Q13732, Q9BUN5, Q4G137, Q05BM8, Q92539, Q2M1I4, Q05CY1, Q6ZR23, Q5JR59, Q05DH2, Q9P0Q5, Q9NV64, Q1XBE0, Q69YW5, Q05DM8, Q9BSB4, Q6P1K4, Q59HH1, Q2YDX2, Q05DF0, O95037, O15479, Q13145, A1L4G9, A0PJW7, O15014, Q14783, Q9Y2B0, Q9Y3E2, Q3BBW2, Q6ZRF1, A0PJN8, Q12916, Q5YKG5, P22676, Q2NKK7, A0AVL2, Q9NPD7, A2VCQ7, Q53G98, Q96CS3, A0JP04, Q53T26, Q6P9E1, Q8TCR4, P48723, O95065, O14891, Q8N3P4, O94909, O94945, Q9H871, Q53HM1, Q6P5R1, Q6NXU1, P46783, Q59F95, Q6ZWB7, Q59HE8, Q05DG5, Q9BUN1, Q68CU5, Q71RF0, A1L0W6, Q59GL6, Q59FW8, Q546Y9, Q4V9L5, Q05BX6, A1L199, Q13659, Q96GQ5, Q8NI58, Q9BTD3, Q08379, Q68VJ4, A2N4P8, Q5U3C3, Q5MY58, A2RTX1, Q15053, A0S0A6, Q05BX0, O43862, Q8IXW5, Q5W9G7, Q9NS93, O75167, Q549N3, A0A4R1, Q6ZSU1, Q8TCA0, Q9BYP9, Q6PJD5, A0N5G7, Q96DX7, Q9NSX9, Q6NUK0, Q7Z345, O60321, Q587J7, Q49AE1, A0PJC9, P06535, Q1ED39, Q4ZG56, A0PJH3, O75090, Q6MZY9, Q5JPP0, A1L381,

Q9HCD6, Q6P052, Q2HXV1, Q7Z4L4, A0PJM6, Q8IZW1, A2RU15, Q96JS4, Q05D72, P03947, Q68VI9, A2VCQ3, P61165, Q12900, Q6IBT0, Q53FS1, Q9HBI5, Q53GU1, Q9P0N2, A1L429, P43355, Q0VD96, Q53F49, Q32Q70, O43466, Q6MZY3, Q566Q2, O75059, Q2M389, Q7L592, Q58WW2, Q5XKB6, Q6PKG0, A0JLR8, Q5T1V4, Q6ZP15, Q05CZ3, Q549M4, O75168, Q8N896, Q13067, Q8N9C1, A2RRP1, Q86V69, Q9P2E5, Q504U0, Q96MD3, Q7L2J0, O00547, Q14157, Q53FL4, Q53ZT9, A2RRB9, P18827, Q8N7I0, Q6I9Z7, A1YLA1, Q9UI14, O95680, P51116, Q6TV07, Q6IQ45, A1DZ74, A0PJ71, P01037, Q9BUE6, O76070, Q05C86, Q53GX9, Q9NZN3, P02545, P49006, P15509, Q8NBS4, Q3ZCW2, Q1KSF7, O14634, Q540G1, Q96IY7, Q66K30, Q5D0K4, Q53F40, O00508, O75112, Q9HC03, A2RUE5, A1L174, A0PK08, Q6ITU8, Q6ZSI7, O75785, P61353, Q96GY3, A2RU93, Q6L9J5, Q9H095, Q53G27, Q8WYP8, Q92521, A2RRQ6, P80303, A0JLT9, A0AV37, Q6ZVZ4, Q05DQ9, Q5DNC5, Q6ZWH1, Q9Y2L2, Q16775, A2VCL5, A0A4Z1, A1L374, A1L1B7, Q6ZTC9, Q8WV27, Q6ZUF3, A2RRE2, Q53H93, Q19CC6, Q6PJQ7, Q9BVI4, Q6PJJ7, O60498, Q7Z6N2, A0JLN5, Q14138, Q59ED9, O60927, Q5U0L9, Q3B7W8, Q17RN0, Q5VYS8, Q8IXM0, Q14693, Q6FHW4, Q6ZSM6, Q96CZ6, Q546E0, Q6FGM0, Q59FF0, Q15532, Q05D76, P23630, A0AV58, Q53XI4, Q59F66, P43366, Q6JIC5, A1L147, Q05CP8, Q0VG09, Q05BS8, P28325, Q6ICC1, Q68D71, O94903, Q4AEJ6, A0PJD1, Q9NUU6, A4FTW3, Q96I57, Q6PIX0, Q8N325, A0MWC9, A1L417, Q6B0I8, Q68A20, Q14CS0, Q59GH8, Q0VDJ6, Q52LL3, O15026, Q5ZEZ6, Q9UBI1, Q8N632, A1L1B5, Q08E78, Q96IP9, Q14050, Q92535, O76095, P09228, Q9H053, Q0VIA0, Q08E72, A1L3W4, Q499Z9, Q12966, Q8TCE6, Q3B778, A2VCN1, Q16655, Q8TBU7, Q59H22, P42975, Q9UJQ1, Q3KNS9, Q59GH2, O15281, Q6NZ63, P04948, A2RU51, Q5U000, Q569H2, A0T1T0, Q0VGB5, Q9BX10, Q4W8W0, A0AVH1, O14792, A1A5C4, Q9NUD9, Q6PID8, A1L3A9, Q08AK5, Q5G0E1, Q32NE2, Q53HC5, Q9P0F3, Q542Z6, Q8IUT8, Q96GX3, Q58F28, Q9H568, Q5MIJQ4, Q2M3R2, Q5YLC1, Q6TDC3, Q9H5Z6, A1L469, Q9H6P2, Q0IIN7, A0JNS3, P07498, Q24JS2, Q8NHP6, A3KME8, Q9BV23, Q8NDI1, Q6ZUR0, O43567, Q4G182, Q5I0G1, Q32N04, Q6NTB9, Q9H7Z1, Q15810, Q59FY5, Q9NQL2, Q6IA88, Q53F25, A2RU55, Q96BX3, Q8TC04

-- 24 of 1688--

GOID GO:0042127 & cell proliferation

TERM regulation of cell proliferation

P-VALUE 2.20574382213064e-08

CORRECTED P-VALUE 3.72329557175652e-05

NUM\_ANNOTATIONS 53 (of 696)

ANNOTATED\_GENES P16234, P35226, P35548, Q96RU8, P42574, Q969H8, P20809, O94788, P10721, Q04721, Q00577, P78536, P56545, P08069, O75563,

P21359, P31371, O14944, P42830, P04085, P30279, Q14457, P12643, P25063, P43490, P21980, Q14201, Q14116, P06748, P28908, O95140, Q06945, Q14106, Q13207, Q15797, O95751, P05556, Q14213, O14683, P38936, P35318, P50616, Q07817, P28907, P12644, Q14004, P52952, Q9GZP9, P51161, P27797, P48230, O00463, P24593

-- 25 of 1688--

GOID GO:0042127

TERM &regulation of cell proliferation

P-VALUE 4.46563678597518e-08

CORRECTED P-VALUE 7.5379948947261e-05

NUM\_ANNOTATIONS 55 (of 751)

ANNOTATED\_GENES P16234, P35226, P35548, Q96RU8, P42574, Q969H8, P20809, O94788, P10721, Q04721, O75411, Q00577, P78536, P56545, P08069, O75563, P21359, P31371, O14944, P42830, P04085, P30279, Q14457, P12643, P25063, P43490, P21980, Q14201, Q14116, P06748, P28908, O95140, Q06945, Q14106, Q13207, Q15797, O95751, P05556, Q14213, O14683, P38936, P35318, P30556, P50616, Q07817, P28907, P12644, Q14004, P52952, Q9GZP9, P51161, P27797, P48230, O00463, P24593

-- 26 of 1688--

GOID GO:0031325

TERM positive regulation of cellular metabolic process

P-VALUE 6.08703254417992e-08

CORRECTED P-VALUE 0.000102749109345757

NUM\_ANNOTATIONS 54 (of 738)

ANNOTATED\_GENES P16234, A2RRB4, P20809, Q12948, P01241, P18848, Q12830, Q92630, P19438, P78536, P23769, P08069, Q99967, P48552, O14944, P48431, O43847, P84022, P04085, P30279, Q14457, P12643, P25063, P40425, Q9H7Z6, Q06413, P55317, P28908, P08651, Q9Y366, Q06945, O43392, Q5T230, Q01196, Q15797, Q02930, Q9BZQ8, Q14213, Q16621, P29375, P62330, O75444, P35222, O00327, O14613, O60244, P12644, P52952, P15514, P43694, Q07687, P27797, P56211, P18850

-- 27 of 1688--

GOID GO:0042981

TERM regulation of apoptosis

P-VALUE 6.12622943384648e-08

CORRECTED P-VALUE 0.000103410752843329

NUM\_ANNOTATIONS 58 (of 819)

ANNOTATED\_GENES P09211, P35548, P55212, P42574, Q13530, Q9Y2A4, Q13114, Q12948, P50897, Q04721, Q92630, O75411, Q9UBY8, P62753, Q92736, O60238, P63104, P08069, P16471, Q99967, P21359, P84022, Q14457, P25063, P21980, Q02535, O00291, P16989, P11021, Q9ULZ3, Q99698, Q06413, P06748, Q13323, P28908, P55061, P49675, Q13075, O95865, Q06945, O43353, Q9Y3A2, O14763, P28482, Q9UBN6, O00257, P38936, Q07817, P28907, P14625, P42858, P52952, P04156, P27797, O00463, P14210, P36896, P49841

-- 28 of 1688--

GOID GO:0043067

TERM &regulation of programmed cell death

P-VALUE 8.87480708185102e-08

CORRECTED P-VALUE 0.000149806743541645

NUM\_ANNOTATIONS 58 (of 828)

ANNOTATED\_GENES P09211, P35548, P55212, P42574, Q13530, Q9Y2A4, Q13114, Q12948, P50897, Q04721, Q92630, O75411, Q9UBY8, P62753, Q92736, O60238, P63104, P08069, P16471, Q99967, P21359, P84022, Q14457, P25063, P21980, Q02535, O00291, P16989, P11021, Q9ULZ3, Q99698, Q06413, P06748, Q13323, P28908, P55061, P49675, Q13075, O95865, Q06945, O43353, Q9Y3A2, O14763, P28482, Q9UBN6, O00257, P38936, Q07817, P28907, P14625, P42858, P52952, P04156, P27797, O00463, P14210, P36896, P49841

-- 29 of 1688--

GOID GO:0043067 & programmed cell death

TERM regulation of programmed cell death

P-VALUE 8.87480708185102e-08

CORRECTED P-VALUE 0.000149806743541645

NUM\_ANNOTATIONS 58 (of 828)

ANNOTATED\_GENES P09211, P35548, P55212, P42574, Q13530, Q9Y2A4, Q13114, Q12948, P50897, Q04721, Q92630, O75411, Q9UBY8, P62753, Q92736, O60238, P63104, P08069, P16471, Q99967, P21359, P84022, Q14457, P25063, P21980, Q02535, O00291, P16989, P11021, Q9ULZ3, Q99698, Q06413, P06748, Q13323, P28908, P55061, P49675, Q13075, O95865, Q06945, O43353, Q9Y3A2, O14763, P28482, Q9UBN6, O00257, P38936, Q07817, P28907, P14625, P42858, P52952, P04156, P27797, O00463, P14210, P36896, P49841

-- 30 of 1688--

GOID GO:0009893

TERM positive regulation of metabolic process

P-VALUE 1.70346121878168e-07

CORRECTED P-VALUE 0.000287544253730348  
NUM\_ANNOTATIONS 54 (of 762)  
ANNOTATED\_GENES P16234, A2RRB4, P20809, Q12948, P01241, P18848,  
Q12830, Q92630, P19438, P78536, P23769, P08069, Q99967, P48552, O14944,  
P48431, O43847, P84022, P04085, P30279, Q14457, P12643, P25063, P40425,  
Q9H7Z6, Q06413, P55317, P28908, P08651, Q9Y366, Q06945, O43392, Q5T230,  
Q01196, Q15797, Q02930, Q9BZQ8, Q14213, Q16621, P29375, P62330, O75444,  
P35222, O00327, O14613, O60244, P12644, P52952, P15514, P43694, Q07687,  
P27797, P56211, P18850

-- 31 of 1688--

GOID GO:0010604

TERM +positive regulation of macromolecule metabolic process

P-VALUE 1.74549702588661e-07

CORRECTED P-VALUE 0.000294639897969659

NUM\_ANNOTATIONS 52 (of 722)

ANNOTATED\_GENES P16234, A2RRB4, P20809, Q12948, P01241, P18848,  
Q12830, Q92630, P19438, P78536, P23769, P08069, Q99967, P48552, O14944,  
P48431, O43847, P84022, P04085, P30279, P12643, P25063, P40425, Q9H7Z6,  
Q06413, P55317, P28908, P08651, Q9Y366, Q06945, O43392, Q5T230, Q01196,  
Q15797, Q02930, Q9BZQ8, Q14213, Q16621, P29375, P62330, O75444, P35222,  
O00327, O14613, O60244, P12644, P52952, P15514, P43694, Q07687, P27797,  
P18850

-- 32 of 1688--

GOID GO:0010604 + macromolecule metabolic process

TERM positive regulation of macromolecule metabolic process

P-VALUE 1.74549702588661e-07

CORRECTED P-VALUE 0.000294639897969659

NUM\_ANNOTATIONS 52 (of 722)

ANNOTATED\_GENES P16234, A2RRB4, P20809, Q12948, P01241, P18848,  
Q12830, Q92630, P19438, P78536, P23769, P08069, Q99967, P48552, O14944,  
P48431, O43847, P84022, P04085, P30279, P12643, P25063, P40425, Q9H7Z6,  
Q06413, P55317, P28908, P08651, Q9Y366, Q06945, O43392, Q5T230, Q01196,  
Q15797, Q02930, Q9BZQ8, Q14213, Q16621, P29375, P62330, O75444, P35222,  
O00327, O14613, O60244, P12644, P52952, P15514, P43694, Q07687, P27797,  
P18850

-- 33 of 1688--

GOID GO:0007167

TERM enzyme linked receptor protein signaling pathway

P-VALUE 1.76154646836602e-07

CORRECTED P-VALUE 0.000297349043860184

NUM\_ANNOTATIONS 38 (of 451)

ANNOTATED\_GENES P16234, P35548, Q8IXS6, Q12948, O15524, P10721, P01241, P12034, P54764, P78536, Q16671, P08069, P16471, P31371, O14944, Q99967, P27986, P84022, P04085, P12643, O75385, P22607, O75962, O15105, Q01082, Q9Y3A2, Q15797, Q6X4U4, P01344, P50616, Q13153, P12644, P15514, O75582, P07949, P36896, P14210, P24593

-- 34 of 1688--

GOID GO:0051094

TERM positive regulation of developmental process

P-VALUE 3.60267638182652e-07

CORRECTED P-VALUE 0.000608131773252316

NUM\_ANNOTATIONS 44 (of 579)

ANNOTATED\_GENES P55212, Q02750, P42574, Q13530, Q9Y2A4, Q13114, O00203, Q04721, Q92630, O75411, P62753, Q92736, O60238, P23769, P21359, P31371, P84022, P12643, P25063, P21980, Q02535, O00291, Q9ULZ3, Q99698, Q13323, P28908, P49675, Q06945, Q14106, O43353, Q01196, Q9Y3A2, Q15797, O14763, P28482, P38936, P28907, O14613, P12644, P42858, P52952, P43694, Q02297, P36896

-- 35 of 1688--

GOID GO:0051239

TERM &regulation of multicellular organismal process

P-VALUE 6.18369216806803e-07

CORRECTED P-VALUE 0.00104380723796988

NUM\_ANNOTATIONS 51 (of 732)

ANNOTATED\_GENES P07288, P25929, Q6UWB1, Q09013, P01241, O00203, P22303, P01258, O75411, P78536, Q92736, P16860, P23769, P32418, P21359, P31371, O14944, P12829, P84022, P04085, P12643, P25063, Q13972, P41222, O00300, Q9ULZ3, Q16568, Q14500, O75385, Q9Y576, P28908, P49675, Q16643, Q14106, Q01196, Q15797, Q9NPI5, Q14213, P35318, P30556, P50616, Q15742, O00425, P12644, P52952, P43694, Q02297, Q07687, P45379, P27797, P36896

-- 36 of 1688--

GOID GO:0051239 & multicellular organismal process

TERM regulation of multicellular organismal process

P-VALUE 6.18369216806803e-07

CORRECTED P-VALUE 0.00104380723796988  
NUM\_ANNOTATIONS 51 (of 732)  
ANNOTATED\_GENES P07288, P25929, Q6UWB1, Q09013, P01241, O00203,  
P22303, P01258, O75411, P78536, Q92736, P16860, P23769, P32418, P21359,  
P31371, O14944, P12829, P84022, P04085, P12643, P25063, Q13972, P41222,  
O00300, Q9ULZ3, Q16568, Q14500, O75385, Q9Y576, P28908, P49675, Q16643,  
Q14106, Q01196, Q15797, Q9NPI5, Q14213, P35318, P30556, P50616, Q15742,  
O00425, P12644, P52952, P43694, Q02297, Q07687, P45379, P27797, P36896

-- 37 of 1688--

GOID GO:0043066

TERM negative regulation of apoptosis

P-VALUE 7.64217154862723e-07

CORRECTED P-VALUE 0.00128999855740828

NUM\_ANNOTATIONS 31 (of 349)

ANNOTATED\_GENES P09211, P35548, Q06413, P06748, P42574, P55061,  
Q13075, P49675, Q12948, P50897, Q04721, O95865, Q06945, Q9UBY8, O60238,  
O00257, Q9UBN6, P63104, P38936, P08069, Q07817, P16471, Q99967, P14625,  
Q14457, P52952, P16989, P04156, P14210, P11021, P49841

-- 38 of 1688--

GOID GO:0015980

TERM energy derivation by oxidation of organic compounds

P-VALUE 8.40119077224519e-07

CORRECTED P-VALUE 0.00141812100235499

NUM\_ANNOTATIONS 18 (of 139)

ANNOTATED\_GENES P35573, P50213, O75390, Q7KZN9, P62140, Q92630,  
P06737, P13807, P14927, Q13423, P17174, Q93100, O95278, P46976, O95685,  
P48735, Q16821, P49841

-- 39 of 1688--

GOID GO:0006936

TERM muscle contraction

P-VALUE 9.29477016938367e-07

CORRECTED P-VALUE 0.00156895720459196

NUM\_ANNOTATIONS 22 (of 200)

ANNOTATED\_GENES Q14500, P14649, Q12797, Q01449, O60237, Q92736,  
P60660, P32418, Q9Y623, P19429, P12829, P13535, Q13884, P52952, Q06432,  
P02708, Q14353, P35499, P45379, P23327, P30559, Q16586

-- 40 of 1688--

GOID GO:0043069

TERM negative regulation of programmed cell death

P-VALUE 1.03480358967791e-06

CORRECTED P-VALUE 0.00174674845937631

NUM\_ANNOTATIONS 31 (of 354)

ANNOTATED\_GENES P09211, P35548, Q06413, P06748, P42574, P55061, Q13075, P49675, Q12948, P50897, Q04721, O95865, Q06945, Q9UBY8, O60238, O00257, Q9UBN6, P63104, P38936, P08069, Q07817, P16471, Q99967, P14625, Q14457, P52952, P16989, P04156, P14210, P11021, P49841

-- 41 of 1688--

GOID GO:0001501

TERM skeletal system development

P-VALUE 1.09858279373949e-06

CORRECTED P-VALUE 0.00185440775583225

NUM\_ANNOTATIONS 31 (of 355)

ANNOTATED\_GENES P16050, O14582, P35548, Q06413, P22607, O60902, P17509, Q12948, P22303, O75411, Q14106, Q15797, P01344, P02458, P50616, P14652, O75444, P31371, P21359, Q92765, Q15742, P20719, P12644, P12643, P50148, Q15486, Q07687, Q9NR12, P15313, O00300, O15232

-- 42 of 1688--

GOID GO:0065008

TERM regulation of biological quality

P-VALUE 1.47704578420639e-06

CORRECTED P-VALUE 0.00249325328374039

NUM\_ANNOTATIONS 94 (of 1720)

ANNOTATED\_GENES P25929, Q8IXS6, O15524, O94788, P22303, P01258, P01215, P78536, Q92736, P32320, Q6ZV73, P14061, Q13162, P12235, P25063, P21980, P02708, P30559, Q6UWJ1, P61106, Q16568, P22607, P17509, P49675, Q9BPW9, P01009, Q01082, P01160, Q16621, P38936, P30556, P35754, Q07817, P62330, P10092, Q9BPX5, O14613, Q9UKI2, P51649, Q9BS26, P01189, P15313, P30990, P27797, P05067, P24593, P36896, Q9H015, P42574, P20809, Q92506, Q12948, P50897, P17081, Q04721, Q9UBY8, P62753, P30047, P06737, P16860, P32418, P21359, P15311, Q15084, P48431, P12829, O43903, Q8IXI2, Q13087, P46092, P84022, P04085, Q13310, P62847, P55317, Q15797, P08708, Q14849, P98194, P35318, P08174, P11277, P17174, P19429, P14625, Q15742, Q5SW96, P12644, Q9GZP9, P50148, P04156, P06576, Q13201, P22460

-- 43 of 1688--

GOID GO:0005977

TERM glycogen metabolic process

P-VALUE 1.55569169365332e-06

CORRECTED P-VALUE 0.0026260075788868

NUM\_ANNOTATIONS 11 (of 55)

ANNOTATED\_GENES P35573, Q93100, P62140, Q92630, O95278, P46976, O95685, P06737, P13807, Q16821, P49841

-- 44 of 1688--

GOID GO:0006073

TERM glucan metabolic process

P-VALUE 1.87833438415314e-06

CORRECTED P-VALUE 0.0031706284404505

NUM\_ANNOTATIONS 11 (of 56)

ANNOTATED\_GENES P35573, Q93100, P62140, Q92630, O95278, P46976, O95685, P06737, P13807, Q16821, P49841

-- 45 of 1688--

GOID GO:0003012

TERM muscle system process

P-VALUE 1.94890548052644e-06

CORRECTED P-VALUE 0.00328975245112863

NUM\_ANNOTATIONS 22 (of 209)

ANNOTATED\_GENES Q14500, P14649, Q12797, Q01449, O60237, Q92736, P60660, P32418, Q9Y623, P19429, P12829, P13535, Q13884, P52952, Q06432, P02708, Q14353, P35499, P45379, P23327, P30559, Q16586

-- 46 of 1688--

GOID GO:0007243

TERM protein kinase cascade

P-VALUE 3.23419557577769e-06

CORRECTED P-VALUE 0.00545932213191274

NUM\_ANNOTATIONS 39 (of 528)

ANNOTATED\_GENES Q96RU8, P29692, P20809, O15524, P10721, P01241, P19438, Q15208, P08069, P40763, P16471, P31371, P21359, Q01638, Q9NRW4, P27986, Q8WVQ1, Q13162, P25063, P21980, P49137, Q9H2K8, Q16568, Q13115, P22607, O43353, Q15797, O14763, P98194, P28482, P78362, O43734, Q99732, O75582, P07949, Q8IV61, O00463, P14210, Q15750

-- 47 of 1688--

GOID GO:0010557

TERM +positive regulation of macromolecule biosynthetic process

P-VALUE 3.57733963413018e-06

CORRECTED P-VALUE 0.00603854930241174

NUM\_ANNOTATIONS 43 (of 611)

ANNOTATED\_GENES P16234, A2RRB4, P20809, Q12948, P18848, Q12830, Q92630, P19438, P23769, P08069, Q99967, P48552, O14944, P48431, P84022, P04085, P12643, P40425, Q9H7Z6, Q06413, P55317, P28908, P08651, Q06945, O43392, Q5T230, Q01196, Q15797, Q02930, Q9BZQ8, Q14213, Q16621, P29375, O75444, P35222, O00327, O60244, P52952, P15514, P43694, Q07687, P27797, P18850

-- 48 of 1688--

GOID GO:0010557 + macromolecule biosynthetic process

TERM positive regulation of macromolecule biosynthetic process

P-VALUE 3.57733963413018e-06

CORRECTED P-VALUE 0.00603854930241174

NUM\_ANNOTATIONS 43 (of 611)

ANNOTATED\_GENES P16234, A2RRB4, P20809, Q12948, P18848, Q12830, Q92630, P19438, P23769, P08069, Q99967, P48552, O14944, P48431, P84022, P04085, P12643, P40425, Q9H7Z6, Q06413, P55317, P28908, P08651, Q06945, O43392, Q5T230, Q01196, Q15797, Q02930, Q9BZQ8, Q14213, Q16621, P29375, O75444, P35222, O00327, O60244, P52952, P15514, P43694, Q07687, P27797, P18850

-- 49 of 1688--

GOID GO:0007267

TERM cell-cell signaling

P-VALUE 3.73922672049818e-06

CORRECTED P-VALUE 0.00631181470420092

NUM\_ANNOTATIONS 50 (of 758)

ANNOTATED\_GENES P20809, P46098, P50897, P12034, P22303, P01215, Q9UBY8, P30047, Q13702, P06401, Q07325, P20382, P21359, O14944, Q9NPH9, P31371, P42830, Q9UHC6, P12235, P04085, P12643, P25063, P43490, P02708, Q13972, Q9UKU6, Q14116, P61106, Q16568, P08949, P43007, P49675, P54252, Q16643, P11487, O00560, P28482, P35318, Q15742, P30989, P10082, P51649, P12644, P01189, P43694, P15514, P50148, P98066, O43597, O76061

-- 50 of 1688--

GOID GO:0031328

TERM positive regulation of cellular biosynthetic process

P-VALUE 3.80108918640717e-06

CORRECTED P-VALUE 0.0064162385466553

NUM\_ANNOTATIONS 44 (of 633)

ANNOTATED\_GENES P16234, A2RRB4, P20809, Q12948, P18848, Q12830, Q92630, P19438, P23769, P08069, Q99967, P48552, O14944, P48431, P84022, P04085, P12643, P40425, Q9H7Z6, Q06413, P55317, P28908, P08651, Q06945, O43392, Q5T230, Q01196, Q15797, Q02930, Q9BZQ8, Q14213, Q16621, P29375, O75444, P35222, O00327, O60244, P52952, P15514, P43694, Q07687, P27797, P56211, P18850

-- 51 of 1688--

GOID GO:0032879

TERM regulation of localization

P-VALUE 4.81149617873809e-06

CORRECTED P-VALUE 0.0081218055497099

NUM\_ANNOTATIONS 29 (of 344)

ANNOTATED\_GENES P16234, Q96RU8, P20809, P50897, P22303, P62070, P78536, Q93096, P23769, P08069, P62330, P32418, Q99967, P21359, P84022, P04085, Q5SW96, P08910, P52952, Q02297, O00291, O95648, P27797, P56211, P24593, P22460, Q9ULZ3, P49841, Q16568

-- 52 of 1688--

GOID GO:0032879 & localization

TERM regulation of localization

P-VALUE 4.81149617873809e-06

CORRECTED P-VALUE 0.0081218055497099

NUM\_ANNOTATIONS 29 (of 344)

ANNOTATED\_GENES P16234, Q96RU8, P20809, P50897, P22303, P62070, P78536, Q93096, P23769, P08069, P62330, P32418, Q99967, P21359, P84022, P04085, Q5SW96, P08910, P52952, Q02297, O00291, O95648, P27797, P56211, P24593, P22460, Q9ULZ3, P49841, Q16568

-- 53 of 1688--

GOID GO:0009891

TERM positive regulation of biosynthetic process

P-VALUE 4.82972628598841e-06

CORRECTED P-VALUE 0.00815257797074843

NUM\_ANNOTATIONS 44 (of 639)

ANNOTATED\_GENES P16234, A2RRB4, P20809, Q12948, P18848, Q12830, Q92630, P19438, P23769, P08069, Q99967, P48552, O14944, P48431, P84022, P04085, P12643, P40425, Q9H7Z6, Q06413, P55317, P28908, P08651, Q06945, O43392, Q5T230, Q01196, Q15797, Q02930, Q9BZQ8, Q14213, Q16621, P29375, O75444, P35222, O00327, O60244, P52952, P15514, P43694, Q07687, P27797, P56211, P18850

-- 54 of 1688--

GOID GO:0006916

TERM anti-apoptosis

P-VALUE 5.24854503497037e-06

CORRECTED P-VALUE 0.00885954401902998

NUM\_ANNOTATIONS 22 (of 222)

ANNOTATED\_GENES P09211, Q06413, P06748, Q13075, P49675, Q12948, Q04721, O95865, O60238, Q9UBN6, O00257, P63104, Q07817, P08069, P16471, Q99967, P14625, Q14457, P52952, P04156, P11021, P14210

-- 55 of 1688--

GOID GO:0006112

TERM energy reserve metabolic process

P-VALUE 5.34906627774993e-06

CORRECTED P-VALUE 0.00902922387684188

NUM\_ANNOTATIONS 11 (of 62)

ANNOTATED\_GENES P35573, Q93100, P62140, Q92630, O95278, P46976, O95685, P06737, P13807, Q16821, P49841

-- 56 of 1688--

GOID GO:0005976

TERM polysaccharide metabolic process

P-VALUE 5.42491120520694e-06

CORRECTED P-VALUE 0.00915725011438932

NUM\_ANNOTATIONS 14 (of 100)

ANNOTATED\_GENES P35573, Q01459, Q93100, P62140, Q9NS84, Q92630, O95278, P46976, O95685, P06737, P13807, Q16821, P49841, P36222

**3. Genes whose correlation vectors in cancer and non-cancer are most separated (in Euclidian sense) in the space of genes,  $D_{i(s1,s2)} > 30$**

Calculate FDR Yes

Gene list Uploaded file Euc\_Dist\_Tail\_30\_2224.dat\_SwissProt.dat

Annotation file gene\_association.goa\_human

Evidence codes included IEA IEP IGI NAS IPI ND IC ISS NR RCA IDA IMP TAS

Unknown identifiers A0PJ72 Q9ULU1 Q86V69 Q6FHX0 Q05D91 Q7L3E0  
O19682 A1L4Q1 A2RUM7 A0JLT9 A2RU75 Q3BBW2 Q6ZVC8 Q53EY9 Q5I0F9  
Q5SQT9 Q96FZ2 Q32MI4 A0PJC9 A2IBT1 A0AUW3 A0ZXF9 Q9P164 Q05CY1  
Q8N7M6 A2RRE2 Q59HE8 Q49AG2 A0PJ82 A3KME8 Q96K99 Q6N040 Q05CI5  
Q6ZRC7 A1A584 O94945 Q5T1V4 Q08AK7 A1Y9B3 Q05DQ0 Q540G1 A1L186  
O94935 O95037 A0PJ71 Q6N0B1 Q05BX2 A4CZ08 Q3B7K5 Q05BL1 Q15053  
Q9H6J7 Q12900 Q59H48 O00145 Q1PBM3 Q4LE41 Q2YDX2 Q6P3U5 O43397  
Q53H93 Q59GL6 A2RRM2 Q96GX3 Q546E0 A2N6W9 Q659F8 Q0IJ49 Q9BW85  
Q0VGC6 Q2VPA3 A2RRQ2 Q9P0N2 Q05CP8 Q53GW4 A1A528 Q59ED6  
A1YBP2 Q5D035 O75139 A0A4R1 Q6NYC6 A1JUI9 Q7Z5Q8 O60321 A2RU15  
A0N0L5 A2RU51 Q53F28 Q16577 Q566Q2 A2RRP5 Q68CX2 O95950 Q5H9S3  
A0PJD1 A2RTZ3 Q0IIN7 A0JLT3 Q3B7K0 A0N6Y5 Q569H2 Q6ZWB7 P48763  
A0JLS9 A2RRL9 Q6ZW10 O60650 Q3ZCS4 Q6IPZ0 Q6DKJ0 Q2YDB1 Q5T9H0  
O00547 A0JLU4 A1L0V1 Q59F66 A2RRD3 P50290 A2VCL5 A0T1T0 Q49A36  
A0PJJ5 A0A5E5 Q6IBB3 Q59E96 Q9NX31 Q59G41 O60770 Q6ZV54 Q05DF0  
Q561W3 Q6IBT0 Q2M2H3 Q658I8 A0JLT6 A2NHL8 A1L159 Q59EU6 Q4LE52  
Q658M8 A2RU94 Q9HCP4 Q3KQV7 Q6IBI8 Q05BE6 P78359 Q9P0F3 A1L0W4  
Q6FHY4 A2RRB5 Q9H0V5 Q05CA2 A0SEH4 A1L454 Q15454 Q9BSH9 O95608  
Q9P199 O02923 O43417 Q08AL5 A1L1B9 Q68DB0 O94820 A1DZ74 A0PJ51  
Q59H12 A2N4P8 A1A5C3 A2RUN2 Q9BRW1 Q53GA7 A0N5G7 Q05DM8  
A1L3W4 Q7Z422 Q4ZG56 Q96IP9 Q15789 O00236 Q659F4 Q63HJ6 O94928  
Q05DH2 Q4G0E1 Q53GD1 Q503B5 Q3ZTT3 A2RRA7 Q9H871 A2VDF2 Q8NDC0  
Q86XV3 A0MWC9 O75141 Q08AF4 Q5YLC1 Q69YJ5 Q0P646 Q6P2R5 A4FTW3  
Q6ICC1 Q59FY1 Q5HYI6 Q2M389 A1L389 Q04197 Q6QIX4 Q5D0K4 O60310  
A2RUS2 Q6IN92 Q8N2J9 Q6MZU4 Q8IUQ3 Q6MZG8 Q7Z4L4 Q5XG91 A1L3W2  
Q24JS4 Q49AE1 Q6ZSJ2 Q6ZW32 Q8N0W5 Q5I0G1 Q96KC3 Q6MZV4 O60838  
Q336F4 Q96F83 A0JLP4 Q53G27 Q59FN6 Q05BP9 Q05BS8 Q3LIB6 A2IXV4  
Q59G34 Q6ZNS4 Q3ZCM5 Q6IAN3 Q0VGB5 Q6ZMY8 Q0P618 O02922 A1L1A2  
Q6IAR2 A0PJ75 Q96I57 Q59FR3 A2TJK5 Q53EM9 A1L469 A0PJA2 Q05C06  
Q6S5B2 Q6ZUA4 A2VCK8 A0AUL4 A2RTY9 O75785 Q14BM2 O60756 Q08AD1  
A1L199 Q12966 Q53HQ1 Q4V9L7 Q9UHT2 Q5W0A3 Q549M8 Q05C49 P62699

Q549M4 Q9NZ81 Q54AC0 Q53YP0 Q6ZSB8 Q53F25 Q68CT8 Q1WWL6 Q6EHZ2  
Q3ZTR9 O15412 Q3KRB6 Q3LIF3 A1L1B7 Q659G6 Q6IA88 Q53FV3 Q9HB72  
Q8IWS1 Q2YDX6 Q8NEZ9 A2RU93 Q549N5 Q9HB17 Q86W39 Q9NZY4  
Q49AG5 Q9HC03 Q15447 Q9BSB4 Q6ZMB4 Q53F37 A1L1A9 Q53GI5 Q68VJ4  
Q53T26 Q7Z4X2 A2RRB9 Q96IY7 Q6AWB6 A1KYQ8 Q59FS0 Q86XN7 Q49AF1  
Q9NRP2 Q53FP3 Q9H6V5 Q86V13 Q9HD34 Q6MZY9 Q32P56 Q4KN17 Q4W4X8  
Q04842 A0AVH1 Q6GU34 Q19CC6 Q0D2P1 Q53FW8 Q53F40 Q68CU4 Q9H079  
O60498 Q9UQL0 Q6PJE6 Q14BN2 Q9H2V5 Q05CA7 Q14783 Q96BX3 Q53GX9  
Q6P2M7 Q6PIX0 Q659D8 Q9BTW0 Q8WWE8 Q542Z6 Q9NUV9 Q6MZT6  
Q59GH2 Q68CK3 Q9HBI5 Q54AC1 Q6IPC4 A0PJW7 A1L303 Q6NXU1 Q6FIF5  
Q5CZ74 Q2TU81 Q6ZUH5 Q6P2H3 Q5XKB6 Q307T1 Q6ZUR0 Q5U3C1 O75406  
Q53F49 Q24JS2 Q5GIA6 Q0VD81 Q5MJQ4 Q53EW6 Q6TDC3 Q05DV5 Q86TR4  
Q9NS11 Q7Z345 Q5TD55 A2RRC2 Q9BXS2 A2RUD1 Q9H8L3 Q9BW21 A0JP21  
Q9UI61 Q68E04 Q9H051 Q71RE8 Q86V02 A1L307 A1L0S7 Q0VDJ6 Q7Z6N2  
Q9BUE6 A0PJH3 Q05CT0 Q59GW9 Q17RW1 Q6AW82 Q69YM8 A0PJE4  
Q3B7W8 Q9H9L4 Q6ZR23 Q2M2P3 Q54AB9 Q8N3Z4 Q6PJ46 Q53XP3 A1L180  
O15026 A2RRR6 Q8NDT0 Q08ET8 Q68EN7 O95276 Q8WYG8 Q3L6K5 Q86Z03  
Q8TCR4 Q8N8E1 Q8N7I0 Q6ZRF1 Q38IJ5 Q59F90

Terms from the process ontology with p-value  $\leq 0.01$ .

The total number of genes used to calculate the background distribution of GO terms is 38594.

-- 1 of 1834--

GOID GO:0048518

TERM positive regulation of biological process

P-VALUE 3.18185191704593e-25

CORRECTED P-VALUE 5.83551641586224e-22

NUM\_ANNOTATIONS 177 (of 1814)

ANNOTATED\_GENES P31785, Q15306, P41182, Q9HCS4, Q9UJH8, Q04771, O00203, Q00577, Q14469, O75411, Q92736, P01137, O60238, Q04864, P48552, P39019, P31749, P78560, P16989, P43405, Q9ULZ3, P07437, P28908, P61088, Q13422, P08651, Q9Y366, P15923, Q14790, Q9BZQ8, O43557, P10071, P17275, O14497, P30556, P62330, P25942, P15153, O15085, P23396, P08238, P68871, P17096, P07948, P43307, P17535, O75940, P25025, Q03014, P50897, P18848, P10636, Q12778, O75787, P35269, P29466, P33681, O75586, Q08722, O14727, Q15788, P10914, P40425, Q14289, P62701, Q02779, P60953, Q06413, P55317, P30281, Q13207, P60981, Q9NVC6, P30273, Q9Y3A2, Q9BRP0, Q12999, P28482, P14317, P04899, O15304, Q99732, P01111, Q9GZP9, Q12906, O75489, P42226,

P19419, P08575, O75925, O15516, P55212, P29692, P16885, Q12951, Q15628, O15392, P61247, Q12981, P63165, Q13263, P25098, Q99967, O75995, Q12905, O60603, Q9H3Q1, Q02535, Q13794, O00291, Q13772, P31146, Q9P0J0, Q96GM5, P15036, Q99607, P46781, Q92838, P36955, P55209, O00468, Q14106, Q9Y3E0, Q01196, Q9C000, P17947, O15519, Q16621, P12830, P38936, P10600, P84095, P18850, P56211, Q9UK73, P46734, P35226, Q969H8, Q9Y2A4, Q04721, Q12830, P62753, P19438, P62826, P08069, Q96P20, P62324, O14781, O43847, P50570, Q9UHK0, P09619, P43490, Q13232, Q9GZY6, Q9H2K8, P68371, Q13418, Q99698, P55211, P06241, Q06187, Q06945, P15498, P51692, P62988, Q02930, P08620, Q93096, P62244, P29375, P32245, P00491, O60356, Q16611, P32519, P61586

-- 2 of 1834--

GOID GO:0048522

TERM positive regulation of cellular process

P-VALUE 4.58103766415084e-25

CORRECTED P-VALUE 8.40162307605264e-22

NUM\_ANNOTATIONS 165 (of 1636)

ANNOTATED\_GENES P31785, Q15306, P41182, Q9HCS4, Q9UJH8, Q04771, O00203, Q00577, Q14469, O75411, Q92736, P01137, O60238, Q04864, P48552, P39019, P31749, P78560, P43405, Q9ULZ3, P07437, P28908, P61088, Q13422, P08651, Q9Y366, P15923, Q14790, Q9BZQ8, O43557, P17275, O14497, P62330, P25942, P15153, O15085, P23396, P08238, P68871, P17096, P07948, P43307, P17535, O75940, P25025, Q03014, P50897, P18848, P10636, Q12778, P35269, P29466, P33681, O75586, Q08722, O14727, Q15788, P10914, P40425, Q14289, P62701, Q02779, P60953, Q06413, P55317, P30281, Q13207, P60981, Q9NVC6, P30273, Q9Y3A2, Q9BRP0, Q12999, P28482, P14317, P04899, O15304, Q99732, P01111, Q9GZP9, Q12906, O75489, P42226, P19419, P08575, O75925, O15516, P55212, P29692, Q12951, Q15628, O15392, P61247, Q12981, P63165, Q13263, Q99967, O75995, Q12905, O60603, Q9H3Q1, Q02535, Q13794, O00291, P31146, Q13772, Q9P0J0, Q96GM5, P15036, Q99607, P46781, P36955, P55209, O00468, Q9Y3E0, Q01196, P17947, O15519, Q9C000, Q16621, P38936, P10600, P84095, P18850, P56211, Q9UK73, P46734, P35226, Q969H8, Q9Y2A4, Q04721, Q12830, P62753, P19438, P62826, P08069, Q96P20, P62324, O14781, O43847, P50570, Q9UHK0, P09619, P43490, Q13232, Q9H2K8, P68371, Q13418, Q99698, P55211, Q06187, Q06945, P15498, P51692, P62988, Q02930, P08620, Q93096, P62244, P29375, P00491, O60356, Q16611, P32519, P61586

-- 3 of 1834--

GOID GO:0048523

TERM negative regulation of cellular process

P-VALUE 3.91286912070226e-23  
CORRECTED P-VALUE 7.17620196736795e-20  
NUM\_ANNOTATIONS 163 (of 1675)  
ANNOTATED\_GENES P41182, O95379, Q9HCS4, Q12959, Q04771, P50281, Q9UFF9, Q9ULR5, P27816, Q00577, Q14469, P01137, O60238, Q9P1W9, P56545, P32320, O75427, P48552, P31749, O60936, P08910, Q12982, P25963, P16989, Q9ULZ3, Q9Y576, P50749, P06748, P28908, Q13422, P08651, Q03989, Q96KC8, Q01082, Q9BZQ8, P09429, P10071, P35227, P48736, P62330, P23396, P17096, Q13542, Q03014, P41220, O14494, P50897, O95425, P10636, Q15669, Q12778, P63104, P25705, O75563, P26045, P04179, P63279, O75190, P62277, P10914, P11309, Q9BZZ5, P35241, P11021, P55055, P60953, Q06413, P55061, Q13207, P30273, O95751, Q9BRP0, Q9UBN6, P28482, P27348, P14625, P04899, O75943, P01111, Q9NSE2, Q12906, O75489, P13693, P08575, Q12824, Q10571, Q06546, Q96BD5, P16885, Q9NQS1, P55273, O15392, P52565, Q12981, P63165, Q13263, P25098, Q99967, P05783, Q02535, P31146, Q9P0J0, Q13796, O15054, P54852, Q13075, O14519, P26651, Q9NPF2, O43251, O95865, Q14106, P31949, O95817, P17947, O15519, P50150, P52566, P38936, O14862, P10600, Q96FS4, Q8I WV1, P21580, P49768, O00499, Q04721, P61925, Q12830, P47756, Q01105, P08069, Q07820, P40763, Q15326, P62324, O14781, O75339, P23508, P14316, Q53EL6, Q01658, O15534, P41240, Q9H2K8, O75366, Q9NZU5, O60383, Q06945, P13164, P62263, O75494, P51692, P49795, P08620, Q9NPI5, O00257, P11277, O00453, Q08999, P06576, P32519, P61586

-- 4 of 1834--

GOID GO:0050793 & developmental process

TERM regulation of developmental process

P-VALUE 4.5773555513058e-23

CORRECTED P-VALUE 8.39487008109484e-20

NUM\_ANNOTATIONS 133 (of 1228)

ANNOTATED\_GENES Q14344, P31785, Q15306, P41182, Q8IXS6, P35609, O95379, Q9UJH8, Q04771, O00203, Q14469, O75411, Q92736, P01137, O60238, Q9P1W9, P31749, O60936, P78560, Q12982, P25963, P16989, P43405, Q9ULZ3, P07437, P06748, P28908, Q14790, P29992, O43557, P09429, P10071, P17275, P35227, P48736, P23396, P17535, O75940, Q03014, P50897, P10636, Q12778, P63104, P29466, P15311, P33681, O14727, P04179, O75190, P11309, Q9BZZ5, P11021, Q02779, P60953, Q06413, P55061, P30273, Q9Y3A2, Q9UBN6, P28482, P14625, O15304, P01111, O75489, P42226, P13693, P50148, Q68HC0, P08575, P55212, P16885, Q15628, P55273, Q9NQS1, O15392, P52565, P61247, Q12981, Q99967, O75995, O60603, P05783, Q02535, P99999, Q9H3Q1, Q13794, O00291, Q9P0J0, P36955, Q13075, O00468, P26651, Q9NPF2, O95865, Q14106, O95817,

Q01196, O15519, Q9C000, P38936, P10600, P42224, P10124, Q9UK73, P21580, Q9Y2A4, P49768, Q04721, P17081, P62753, P08069, Q07820, Q96P20, P62324, O14781, P50570, Q13232, P68371, Q99698, P55211, Q9NP74, Q06187, Q06945, P51692, P62988, P08620, Q9NPI5, O00257, P00491, O00453, O60356, Q16611, P61586

-- 5 of 1834--

GOID GO:0050793

TERM &regulation of developmental process

P-VALUE 5.30512181127932e-23

CORRECTED P-VALUE 9.72959340188628e-20

NUM\_ANNOTATIONS 133 (of 1230)

ANNOTATED\_GENES Q14344, P31785, Q15306, P41182, Q8IXS6, P35609, O95379, Q9UJH8, Q04771, O00203, Q14469, O75411, Q92736, P01137, O60238, Q9P1W9, P31749, O60936, P78560, Q12982, P25963, P16989, P43405, Q9ULZ3, P07437, P06748, P28908, Q14790, P29992, O43557, P09429, P10071, P17275, P35227, P48736, P23396, P17535, O75940, Q03014, P50897, P10636, Q12778, P63104, P29466, P15311, P33681, O14727, P04179, O75190, P11309, Q9BZZ5, P11021, Q02779, P60953, Q06413, P55061, P30273, Q9Y3A2, Q9UBN6, P28482, P14625, O15304, P01111, O75489, P42226, P13693, P50148, Q68HC0, P08575, P55212, P16885, Q15628, P55273, Q9NQS1, O15392, P52565, P61247, Q12981, Q99967, O75995, O60603, P05783, Q02535, P99999, Q9H3Q1, Q13794, O00291, Q9P0J0, P36955, Q13075, O00468, P26651, Q9NPF2, O95865, Q14106, O95817, Q01196, O15519, Q9C000, P38936, P10600, P42224, P10124, Q9UK73, P21580, Q9Y2A4, P49768, Q04721, P17081, P62753, P08069, Q07820, Q96P20, P62324, O14781, P50570, Q13232, P68371, Q99698, P55211, Q9NP74, Q06187, Q06945, P51692, P62988, P08620, Q9NPI5, O00257, P00491, O00453, O60356, Q16611, P61586

-- 6 of 1834--

GOID GO:0012501

TERM programmed cell death

P-VALUE 4.69766243599497e-22

CORRECTED P-VALUE 8.61551290761478e-19

NUM\_ANNOTATIONS 125 (of 1144)

ANNOTATED\_GENES P55212, P41182, Q13177, P35609, O95379, O95816, Q04771, P16885, Q9NQS1, P55273, Q15628, O75411, Q92736, P01137, P61247, P52565, O15392, O60238, Q9P1W9, Q12981, P28331, Q99967, P31749, O60936, O60603, P05783, P61073, P78560, Q12982, P99999, Q02535, P25963, O00291, Q13794, P16989, Q9P0J0, Q9ULZ3, P07437, P51575, P06748, P28908, Q13075,

Q9NPF2, Q14790, O95865, O95817, O75807, Q9C000, O15519, O43557, P09429, P35227, P38936, P48736, P62330, P10600, P25942, P23396, P12236, P42224, P10124, Q9UK73, O75940, P21580, P25025, Q6NYC1, Q9Y2A4, P50897, P49768, Q04721, Q9HAU6, Q12778, P19438, P62753, P21127, P63104, P08069, Q96P20, Q07820, P29466, P62324, P29350, O14781, Q8IXI2, P21796, P50570, O14727, O14798, P04179, Q53EL6, O75190, P11309, Q9BZZ5, Q13232, P11021, Q14289, P68371, Q02779, Q06413, Q99698, P55211, P20333, P55061, Q06187, Q06945, P51692, P30273, Q9Y3A2, P08620, Q9UBN6, P28482, O00257, Q9UL15, P14625, O15304, O60356, P01111, Q99732, O75489, Q16611, P13693, Q68HC0, P08575, Q6NUS6, P61586

-- 7 of 1834--

GOID GO:0048519

TERM negative regulation of biological process

P-VALUE 5.41937282830542e-22

CORRECTED P-VALUE 9.93912976711213e-19

NUM\_ANNOTATIONS 169 (of 1813)

ANNOTATED\_GENES P41182, O95379, Q9HCS4, Q12959, Q04771, P50281, Q9UFF9, Q9ULR5, P27816, Q00577, Q14469, P01137, O60238, Q9P1W9, P56545, P32320, O75427, P48552, P31749, O60936, P08910, Q12982, P25963, P16989, Q9ULZ3, Q9Y576, P50749, P06748, P28908, Q13422, P08651, Q03989, Q96KC8, Q9UN86, Q01082, Q9BZQ8, P09429, P10071, P35227, P48736, P62330, P23396, P17096, Q13542, Q03014, P41220, O14494, P50897, O95425, P10636, Q15669, Q12778, P63104, P25705, O75563, P26045, P04179, P63279, O75190, P62277, P10914, P11309, Q9BZZ5, P35241, P11021, P55055, P60953, Q06413, P55061, Q13207, P30273, O95751, Q9BRP0, Q9UBN6, P28482, P27348, P14625, P04899, O75943, P01111, Q9NSE2, Q12906, O75489, P42226, P13693, P08575, Q12824, Q10571, Q06546, Q96BD5, P16885, Q9NQS1, P55273, O15392, P52565, Q12981, P63165, Q13263, P25098, Q99967, P05783, Q02535, P31146, Q9P0J0, P98179, Q13796, O15054, P36955, P54852, Q13075, P26651, O14519, Q9NPF2, O43251, O95865, Q14106, P31949, O95817, P17947, O15519, P50150, P52566, P38936, O14862, P10600, Q96FS4, Q8IWV1, P10124, P21580, P49768, O00499, Q04721, P61925, Q12830, P47756, Q01105, P08069, Q96P20, Q07820, P40763, Q15326, P62324, O14781, O75339, P23508, P14316, Q53EL6, Q01658, O15534, P41240, Q9H2K8, O75366, Q9NZU5, O60383, Q06945, P13164, P62263, O75494, P51692, P49795, P08620, Q9NPI5, O00257, P11277, O00453, Q08999, P06576, P32519, P61586

-- 8 of 1834--

GOID GO:0006915

TERM apoptosis

P-VALUE 7.01972471901715e-22

CORRECTED P-VALUE 1.28741751346775e-18

NUM\_ANNOTATIONS 124 (of 1135)

ANNOTATED\_GENES P55212, P41182, Q13177, P35609, O95379, O95816, Q04771, Q9NQS1, P55273, Q15628, O75411, Q92736, P01137, P61247, P52565, O15392, O60238, Q9P1W9, Q12981, P28331, Q99967, P31749, O60936, O60603, P05783, P61073, P78560, Q12982, P99999, Q02535, P25963, O00291, Q13794, P16989, Q9P0J0, Q9ULZ3, P07437, P51575, P06748, P28908, Q13075, Q9NPF2, Q14790, O95865, O95817, O75807, Q9C000, O15519, O43557, P09429, P35227, P38936, P48736, P62330, P10600, P25942, P23396, P12236, P42224, P10124, Q9UK73, O75940, P21580, P25025, Q6NYC1, Q9Y2A4, P50897, P49768, Q04721, Q9HAU6, Q12778, P19438, P62753, P21127, P63104, P08069, Q96P20, Q07820, P29466, P62324, P29350, O14781, Q8IXI2, P21796, P50570, O14727, O14798, P04179, Q53EL6, O75190, P11309, Q9BZZ5, Q13232, P11021, Q14289, P68371, Q02779, Q06413, Q99698, P55211, P20333, P55061, Q06187, Q06945, P51692, P30273, Q9Y3A2, P08620, Q9UBN6, P28482, O00257, Q9UL15, P14625, O15304, O60356, P01111, Q99732, O75489, Q16611, P13693, Q68HC0, P08575, Q6NUS6, P61586

-- 9 of 1834--

GOID GO:0043067

TERM &regulation of programmed cell death

P-VALUE 2.13058571147905e-20

CORRECTED P-VALUE 3.90749419485258e-17

NUM\_ANNOTATIONS 99 (of 828)

ANNOTATED\_GENES P55212, P41182, P35609, O95379, Q04771, P16885, Q9NQS1, P55273, Q15628, O75411, Q92736, P01137, P61247, P52565, O15392, O60238, Q9P1W9, Q12981, Q99967, P31749, O60936, O60603, P05783, P78560, Q12982, P99999, Q02535, O00291, Q13794, P16989, Q9P0J0, Q9ULZ3, P07437, P06748, P28908, Q13075, Q9NPF2, Q14790, O95865, O95817, Q9C000, O15519, O43557, P09429, P35227, P38936, P48736, P10600, P23396, P42224, Q9UK73, O75940, P21580, Q9Y2A4, P50897, P49768, Q04721, Q12778, P62753, P63104, P08069, Q96P20, Q07820, P29466, P62324, O14781, P50570, O14727, P04179, O75190, P11309, Q9BZZ5, Q13232, P11021, P68371, Q02779, Q06413, Q99698, P55211, P55061, Q06187, Q06945, P51692, P30273, Q9Y3A2, P08620, Q9UBN6, P28482, O00257, P14625, O15304, O60356, P01111, O75489, Q16611, P13693, Q68HC0, P08575, P61586

-- 10 of 1834--

GOID GO:0043067 & programmed cell death

TERM regulation of programmed cell death

P-VALUE 2.13058571147905e-20

CORRECTED P-VALUE 3.90749419485258e-17

NUM\_ANNOTATIONS 99 (of 828)

ANNOTATED\_GENES P55212, P41182, P35609, O95379, Q04771, P16885, Q9NQS1, P55273, Q15628, O75411, Q92736, P01137, P61247, P52565, O15392, O60238, Q9P1W9, Q12981, Q99967, P31749, O60936, O60603, P05783, P78560, Q12982, P99999, Q02535, O00291, Q13794, P16989, Q9P0J0, Q9ULZ3, P07437, P06748, P28908, Q13075, Q9NPF2, Q14790, O95865, O95817, Q9C000, O15519, O43557, P09429, P35227, P38936, P48736, P10600, P23396, P42224, Q9UK73, O75940, P21580, Q9Y2A4, P50897, P49768, Q04721, Q12778, P62753, P63104, P08069, Q96P20, Q07820, P29466, P62324, O14781, P50570, O14727, P04179, O75190, P11309, Q9BZZ5, Q13232, P11021, P68371, Q02779, Q06413, Q99698, P55211, P55061, Q06187, Q06945, P51692, P30273, Q9Y3A2, P08620, Q9UBN6, P28482, O00257, P14625, O15304, O60356, P01111, O75489, Q16611, P13693, Q68HC0, P08575, P61586

-- 11 of 1834--

GOID GO:0042981

TERM regulation of apoptosis

P-VALUE 3.15814077525217e-20

CORRECTED P-VALUE 5.79203018181249e-17

NUM\_ANNOTATIONS 98 (of 819)

ANNOTATED\_GENES P55212, P41182, P35609, O95379, Q04771, Q9NQS1, P55273, Q15628, O75411, Q92736, P01137, P61247, P52565, O15392, O60238, Q9P1W9, Q12981, Q99967, P31749, O60936, O60603, P05783, P78560, Q12982, P99999, Q02535, O00291, Q13794, P16989, Q9P0J0, Q9ULZ3, P07437, P06748, P28908, Q13075, Q9NPF2, Q14790, O95865, O95817, Q9C000, O15519, O43557, P09429, P35227, P38936, P48736, P10600, P23396, P42224, Q9UK73, O75940, P21580, Q9Y2A4, P50897, P49768, Q04721, Q12778, P62753, P63104, P08069, Q96P20, Q07820, P29466, P62324, O14781, P50570, O14727, P04179, O75190, P11309, Q9BZZ5, Q13232, P11021, P68371, Q02779, Q06413, Q99698, P55211, P55061, Q06187, Q06945, P51692, P30273, Q9Y3A2, P08620, Q9UBN6, P28482, O00257, P14625, O15304, O60356, P01111, O75489, Q16611, P13693, Q68HC0, P08575, P61586

-- 12 of 1834--

GOID GO:0008219

TERM cell death

P-VALUE 3.4741158749446e-20

CORRECTED P-VALUE 6.37152851464839e-17

NUM\_ANNOTATIONS 125 (of 1204)

ANNOTATED\_GENES P55212, P41182, Q13177, P35609, O95379, O95816, Q04771, P16885, Q9NQS1, P55273, Q15628, O75411, Q92736, P01137, P61247, P52565, O15392, O60238, Q9P1W9, Q12981, P28331, Q99967, P31749, O60936, O60603, P05783, P61073, P78560, Q12982, P99999, Q02535, P25963, O00291, Q13794, P16989, Q9P0J0, Q9ULZ3, P07437, P51575, P06748, P28908, Q13075, Q9NPF2, Q14790, O95865, O95817, O75807, Q9C000, O15519, O43557, P09429, P35227, P38936, P48736, P62330, P10600, P25942, P23396, P12236, P42224, P10124, Q9UK73, O75940, P21580, P25025, Q6NYC1, Q9Y2A4, P50897, P49768, Q04721, Q9HAU6, Q12778, P19438, P62753, P21127, P63104, P08069, Q96P20, Q07820, P29466, P62324, P29350, O14781, Q8IXI2, P21796, P50570, O14727, O14798, P04179, Q53EL6, O75190, P11309, Q9BZZ5, Q13232, P11021, Q14289, P68371, Q02779, Q06413, Q99698, P55211, P20333, P55061, Q06187, Q06945, P51692, P30273, Q9Y3A2, P08620, Q9UBN6, P28482, O00257, Q9UL15, P14625, O15304, O60356, P01111, Q99732, O75489, Q16611, P13693, Q68HC0, P08575, Q6NUS6, P61586

-- 13 of 1834--

GOID GO:0016265

TERM death

P-VALUE 4.56950229683358e-20

CORRECTED P-VALUE 8.38046721239279e-17

NUM\_ANNOTATIONS 125 (of 1208)

ANNOTATED\_GENES P55212, P41182, Q13177, P35609, O95379, O95816, Q04771, P16885, Q9NQS1, P55273, Q15628, O75411, Q92736, P01137, P61247, P52565, O15392, O60238, Q9P1W9, Q12981, P28331, Q99967, P31749, O60936, O60603, P05783, P61073, P78560, Q12982, P99999, Q02535, P25963, O00291, Q13794, P16989, Q9P0J0, Q9ULZ3, P07437, P51575, P06748, P28908, Q13075, Q9NPF2, Q14790, O95865, O95817, O75807, Q9C000, O15519, O43557, P09429, P35227, P38936, P48736, P62330, P10600, P25942, P23396, P12236, P42224, P10124, Q9UK73, O75940, P21580, P25025, Q6NYC1, Q9Y2A4, P50897, P49768, Q04721, Q9HAU6, Q12778, P19438, P62753, P21127, P63104, P08069, Q96P20, Q07820, P29466, P62324, P29350, O14781, Q8IXI2, P21796, P50570, O14727, O14798, P04179, Q53EL6, O75190, P11309, Q9BZZ5, Q13232, P11021, Q14289, P68371, Q02779, Q06413, Q99698, P55211, P20333, P55061, Q06187, Q06945, P51692, P30273, Q9Y3A2, P08620, Q9UBN6, P28482, O00257, Q9UL15, P14625, O15304, O60356, P01111, Q99732, O75489, Q16611, P13693, Q68HC0, P08575, Q6NUS6, P61586

-- 14 of 1834--

GOID GO:0032502

TERM developmental process

P-VALUE 5.61462514505931e-16

CORRECTED P-VALUE 1.02972225160388e-12

NUM\_ANNOTATIONS 295 (of 4393)

ANNOTATED\_GENES P31785, P41182, P35609, Q99584, Q9UJH8, Q12959, O95816, Q04771, P50281, Q00577, Q14469, O75411, P40123, Q92837, O75427, P48552, Q9Y4F9, P61073, P78560, P53365, Q12982, P43405, Q9ULZ3, Q9Y576, Q9Y366, P15923, Q14790, P29992, P09429, P17275, P30556, Q07001, P25942, P15153, P23396, P12236, P08238, P09630, P07949, O75581, P07948, Q01650, P08123, Q03014, Q6NYC1, O95425, Q12778, P63104, Q9NXR1, P15311, Q8IXI2, P16157, P19338, P20290, O14798, P01100, P04179, P42768, P63146, P11309, Q9BZZ5, P35241, P62701, P60953, Q13207, Q9H0B8, P30273, Q9BRP0, P63261, Q9UBN6, P28482, P14625, O15304, Q99732, P54762, P42226, Q12968, P02452, Q7L1T6, Q13177, P16885, Q9NQS1, P61247, P19404, Q99967, Q13263, P25098, O75995, O60603, P99999, P31146, Q9P0J0, P15036, Q13796, P51575, P36955, Q01518, P26651, Q9NPF2, O95865, O75807, O15519, P52566, P07737, P10600, Q96EK5, Q04726, P10124, Q9UBI9, Q9UK73, P35226, P14649, P17081, Q04721, P19438, P62753, Q9Y657, O95238, P21127, P40763, Q07820, O14781, O60486, P21796, Q6UWC1, Q9NQ50, Q13232, O75366, Q14254, Q13418, Q9Y6A4, Q99698, P55211, Q9NP74, P06241, O75474, O60383, P62263, O60701, P51692, P62988, P08620, Q9NPI5, P55268, P29375, P00491, O60356, Q16611, P45379, Q16586, Q9Y508, Q14344, Q15306, Q8IXS6, Q9UNS2, O95379, Q9HCS4, O00203, P05549, P55287, P01137, Q92736, O60238, Q9P1W9, P39019, P31749, O60936, Q08117, Q9NZG7, P25963, P16989, P13611, P12111, P07585, P07437, Q04725, P06748, P28908, P29373, Q13422, O43557, P10071, P35227, P48736, P62330, O15513, O15085, P17535, O75940, P25025, P50897, P23771, P10636, Q96E22, Q15669, P39059, Q16671, P25705, P29466, P33681, P08631, O14727, P10914, O75190, P40425, Q14289, P11021, Q02779, Q92882, Q06413, P20333, P55317, P55061, Q9Y3A2, Q14494, P14317, Q14689, Q9UL15, Q15303, P01111, O75489, P50148, P13693, Q68HC0, Q9Y5P3, P08575, Q6NUS6, Q12824, Q01543, P55212, Q06546, Q12951, Q15628, P55273, P52565, O15392, P40424, Q12981, P28331, Q9UGM1, Q14118, P08727, P12757, P05783, Q9H3Q1, Q02535, Q13794, O00291, P02686, Q13772, P13612, Q92838, Q13075, O00468, Q14106, O95817, Q01196, P17947, Q9C000, O00560, P34820, Q16621, P38936, P42224, Q01453, P21580, P47914, Q9ULV1, Q14738, Q9Y2A4, P49768, O00499, Q12830, P19971, P55327, Q9HAU6, P08069, Q96P20, P62324, P29350, O43847, P50570, Q53EL6, Q9H3M7, P68371,

Q06187, Q06945, P28289, Q93096, O00257, O00453, P25940, Q13277, P06576, P61586

-- 15 of 1834--

GOID GO:0043069

TERM negative regulation of programmed cell death

P-VALUE 7.15483163756854e-15

CORRECTED P-VALUE 1.31219612233007e-11

NUM\_ANNOTATIONS 52 (of 354)

ANNOTATED\_GENES P41182, P21580, O95379, Q04771, P49768, P50897, Q04721, P16885, Q12778, Q9NQS1, P55273, P52565, O15392, O60238, Q9P1W9, Q12981, P63104, P08069, Q07820, Q99967, O14781, P31749, O60936, P05783, Q12982, P16989, P04179, P11309, Q9BZZ5, P11021, Q06413, P06748, P55061, Q13075, Q9NPF2, Q06945, O95865, P51692, O95817, P30273, P08620, O15519, P09429, Q9UBN6, O00257, P35227, P38936, P48736, P14625, P01111, P13693, P61586

-- 16 of 1834--

GOID GO:0008380

TERM RNA splicing

P-VALUE 1.32337813707703e-14

CORRECTED P-VALUE 2.42707550339927e-11

NUM\_ANNOTATIONS 43 (of 256)

ANNOTATED\_GENES P07910, O75940, P09651, P62314, Q13427, Q9UK45, P09234, Q15287, Q9BWJ5, P38159, Q01081, P23246, P11940, P14678, P61978, Q92620, P84103, Q15233, O60936, Q13595, P26599, Q15007, P52272, P62277, P31942, Q13247, Q00839, O43251, O75494, Q8IYB3, P61326, P31943, Q15427, O00148, P55769, Q96MU7, Q16629, Q15459, P17844, O60506, P62304, Q13243, P62995

-- 17 of 1834--

GOID GO:0043066

TERM negative regulation of apoptosis

P-VALUE 1.60336202800729e-14

CORRECTED P-VALUE 2.94056595936537e-11

NUM\_ANNOTATIONS 51 (of 349)

ANNOTATED\_GENES P41182, P21580, O95379, Q04771, P49768, P50897, Q04721, Q12778, Q9NQS1, P55273, P52565, O15392, O60238, Q9P1W9, Q12981, P63104, P08069, Q07820, Q99967, O14781, P31749, O60936, P05783, Q12982, P16989, P04179, P11309, Q9BZZ5, P11021, Q06413, P06748, P55061, Q13075,

Q9NPF2, Q06945, O95865, P51692, O95817, P30273, P08620, O15519, P09429, Q9UBN6, P35227, O00257, P38936, P48736, P14625, P01111, P13693, P61586

-- 18 of 1834--

GOID GO:0006396

TERM RNA processing

P-VALUE 1.07296685901799e-13

CORRECTED P-VALUE 1.96782121943899e-10

NUM\_ANNOTATIONS 70 (of 616)

ANNOTATED\_GENES Q32P41, P09651, P62314, Q13427, P09234, Q15287, Q01081, P23246, Q9NPE3, P14678, P61978, P39019, O14979, O60936, Q13595, Q14493, O43791, P26599, Q15007, P62857, P62249, P52272, P98179, Q13247, O43251, P61326, Q8IYB3, Q14103, Q15427, P62913, Q96MU7, P62081, P17844, Q15459, O60506, Q6NUM6, P51003, P62304, Q13243, P07910, O75940, Q9NV88, P29558, P62753, Q9UK45, Q9BWJ5, P38159, P11940, P21127, Q15233, P84103, Q92620, Q9UHK0, Q13310, P62847, P62277, P31942, P18124, Q00839, P18077, Q75QN2, P62263, O75494, Q9Y3A2, P08708, P31943, O00148, P55769, Q16629, P62995

-- 19 of 1834--

GOID GO:0016043

TERM cellular component organization

P-VALUE 2.84316502907682e-13

CORRECTED P-VALUE 5.21436466332688e-10

NUM\_ANNOTATIONS 207 (of 2933)

ANNOTATED\_GENES O15511, Q14344, P41182, O95931, Q8IXS6, P35609, P98171, Q9HCS4, Q9UJH8, Q12959, P62314, O00203, Q9ULR5, P27816, Q92673, P40123, O00161, P01137, O60739, Q9P1W9, Q96T51, O60896, O94953, P32320, P46782, P39019, P31749, O15145, O15371, P61073, P53365, P68431, P05388, P43405, P07437, P06748, O95405, P61088, Q15545, Q01082, Q9H074, Q13596, P09429, O14497, P35227, P41567, P62330, Q9BPX5, P25942, P15153, O15085, P23396, P62081, Q15459, O75581, P17096, P62304, P0C0S5, Q13542, O75940, P08123, Q9Y221, Q86UE8, Q6NYC1, O43516, O43747, P50897, O95425, P10636, Q9H902, P35269, Q15056, Q9P0N8, Q9NXR1, O75563, P15311, P68363, P16157, O00303, P04179, P42768, P63146, P35241, O75251, P55010, Q14289, P61158, P60953, O75164, P56270, P16104, Q12887, Q9Y5J9, P60981, Q9Y6X1, Q9NVC6, P30273, Q9Y3A2, P08708, P63261, P55769, Q9UHA3, P01111, Q9H8Y8, O75582, P02452, Q12824, Q93077, P50750, O00505, Q15014, Q96BD5, P09234, P61247, Q12981, P63165, O00628, Q9NPE3, Q14118, Q13263, P08727, P06730, Q07157, P12235, Q30201, Q93079, Q9H3Q1, P99999, P62857, Q13794, O00291, P62249,

P31146, O14646, Q9P0J0, Q96GM5, Q9H4M9, Q13247, Q13796, O15054, Q9UBK9, P55209, O00468, Q01518, O14925, O15144, P62913, Q16621, O00560, Q9H853, P07737, Q15642, P10600, P32121, P51149, O15533, Q96FS4, P08237, Q9P0V3, Q13243, P10124, P35226, O00499, P17081, Q12830, P19971, P62753, P84243, P47756, Q01105, P08069, Q96P20, O14781, O43847, P50570, P62847, P68371, O75366, P18124, Q13418, P13498, O43823, Q99698, P68366, Q9NP74, P11717, P18077, O95466, O60383, O75494, P15498, P62263, Q92522, P62988, P28289, O00257, P55268, P11277, P29375, O60763, O00453, P25940, Q16611, Q13277, P30566, Q08999, P61586

-- 20 of 1834--

GOID GO:0006091

TERM generation of precursor metabolites and energy

P-VALUE 1.37924188449173e-12

CORRECTED P-VALUE 2.52952961615783e-09

NUM\_ANNOTATIONS 62 (of 537)

ANNOTATED\_GENES P35573, O75746, O75390, P62140, P04406, P31930, P08559, P06737, P21281, P13807, P10515, Q9UQK1, P28331, O95169, P25705, P14927, P19404, Q13423, P49447, P27449, P31749, P40926, P48201, P12235, P99999, O43674, P51970, P18859, P04179, P47985, Q9P0J0, O75251, P11177, P07919, P05496, P40925, P13498, Q00325, P50213, P21912, O15239, P22695, Q12887, Q13011, O00483, P09669, O75306, Q06055, O75964, P17174, O43837, O43676, P08237, O95278, O75489, P10109, P15954, Q12968, Q16821, P06576, Q7L1T6, P13073

-- 21 of 1834--

GOID GO:0051094

TERM positive regulation of developmental process

P-VALUE 1.41142020408993e-12

CORRECTED P-VALUE 2.58854465430093e-09

NUM\_ANNOTATIONS 65 (of 579)

ANNOTATED\_GENES P31785, P55212, P41182, Q9UJH8, Q04771, O00203, Q15628, O75411, Q92736, P01137, P61247, O60238, Q12981, O75995, O60603, P78560, Q9H3Q1, Q02535, O00291, Q13794, P43405, Q9P0J0, Q9ULZ3, P07437, P28908, P36955, Q14106, Q01196, Q9C000, O15519, O43557, P17275, P38936, P10600, P23396, P17535, Q9UK73, O75940, Q9Y2A4, Q04721, P10636, P62753, Q96P20, P62324, P33681, O14781, P50570, O14727, Q13232, P68371, Q02779, Q99698, P60953, P55211, Q06187, Q06945, P51692, Q9Y3A2, P28482, P00491, O15304, O60356, Q16611, O75489, P08575

-- 22 of 1834--

GOID GO:0051093

TERM negative regulation of developmental process

P-VALUE 1.92233051769106e-12

CORRECTED P-VALUE 3.5255541694454e-09

NUM\_ANNOTATIONS 63 (of 555)

ANNOTATED\_GENES P41182, P21580, Q03014, O95379, Q04771, P49768, P50897, Q04721, P16885, Q12778, Q9NQ51, P55273, Q14469, P01137, P52565, O15392, O60238, Q9P1W9, Q12981, P63104, P08069, Q07820, Q99967, O14781, P31749, O60936, P05783, Q12982, P25963, P16989, P04179, P11309, Q9BZZ5, P11021, Q06413, P06748, P36955, Q13075, P55061, P26651, Q9NPF2, Q06945, O95865, Q14106, P51692, P30273, O95817, P08620, Q9NPI5, O15519, P09429, P10071, Q9UBN6, P28482, O00257, P35227, P38936, P48736, P14625, P01111, P13693, P10124, P61586

-- 23 of 1834--

GOID GO:XXXXXXX

TERM unannotated

P-VALUE 9.19497787341043e-12

CORRECTED P-VALUE 1.68635894198347e-08

NUM\_ANNOTATIONS 610 (of 11418)

ANNOTATED\_GENES Q9UHT2, A2RRP5, Q2YDB1, O00214, A1L389, Q3LIF3, Q96FZ2, A0AV96, P35268, Q3B7K0, P13639, P62851, Q68CU4, O75391, Q7Z4X2, Q59F90, Q6ZUH5, A1Y9B3, P24311, Q8NG11, Q6IN92, O43417, Q561W3, Q14515, A0JLS9, Q9BTL4, Q54AB9, Q9BTW0, Q59E96, A0ZXF9, Q9HD34, Q9H993, Q8N3Z4, Q9NUV9, Q8IUQ3, A2RUD1, A0AUL4, Q59H12, Q9BUJ0, Q59FN6, Q96D70, Q4G0E1, Q5I0F9, O14974, Q86XV3, Q6P0N0, Q08AF4, Q15454, Q3BBV0, Q658I8, Q49A36, A0PJ72, Q92901, A2RRR6, A0JLP4, A2RUS2, A2RRB5, A0JLT6, Q05DQ0, Q6N040, Q6MZV4, O60838, Q5D035, A2RRA7, P12318, Q6GU34, Q549N5, Q6MZT6, Q9UBW5, Q08AD1, Q9NUE0, Q6ZR23, Q6Y7W6, O94876, Q17RZ5, Q9BSB4, Q54AC1, Q05DF0, O95037, P62750, Q2YDX6, Q86TR4, A0P JW7, Q53HQ1, O75204, A1A584, O15014, Q14783, Q05CA2, Q0P5W4, Q9Y2B0, Q3BBW2, Q13239, A0PJA2, Q7Z5Q8, Q96CS3, Q1PBM3, Q53T26, Q5T9H0, Q5W0A3, P48723, Q68CT8, Q53EM9, Q9H6J7, Q32MI4, Q9NZY4, Q9H871, Q6NXU1, Q86V13, Q6ZWB7, Q6P2H3, O43397, Q59GL6, Q07020, Q13536, P63098, A2N4P8, Q53FP3, A0A4R1, A0JP21, A2VCK8, Q336F4, Q96F83, A0N5G7, Q59F22, Q59FR3, Q86V02, O60770, Q49AE1, Q9H9L4, A0PJC9, Q5MIZ7, Q6MZY9, Q0D2P1, Q659F4, P78359, Q53EY9, Q53FW8, Q6ZRC7, Q96EW2, Q6IPC4, P61165, Q6IBT0, A2RUM7, Q53F49, Q9P2W6, Q68E04, Q5HYI6, Q16577, Q2M389, P48763, Q6ZVC8, Q5SQT9, P39023,

Q58WW2, Q9HB17, Q7Z5Q3, Q5T1V4, Q9NS11, Q5TD55, Q3LIB6, O75054, Q549M4, Q0VGC6, Q59FY1, Q69YM8, Q9P2E5, Q86V69, O75368, Q15038, Q14157, Q5U3C1, Q2M2P3, Q7L3E0, A2RRB9, Q59H48, O60756, Q8IXX5, Q5CZ74, A1DZ74, Q8IWS1, Q9BUE6, Q9NRP2, Q6ZSB8, A1L454, P15509, Q53GI5, Q3YAD0, Q9Y4F3, A1L303, P62699, A2RQR6, Q6DKJ0, O75112, Q6ZMB4, O75785, O60650, Q92521, Q6S5B2, Q8N7M6, O75323, Q17RW1, A2VCL5, P62945, A1L1B7, Q6ZUA4, Q54AC0, Q6AW82, Q53H93, Q19CC6, Q6MZG8, Q7Z6N2, O43493, O94935, A0PJE4, O60927, Q3B7W8, P49207, Q5VYS8, O95276, Q5H9S3, Q96KC3, Q8WWE8, Q2M2H3, Q7L591, Q546E0, A1L180, O15321, Q59G34, Q59F66, O75165, Q05CP8, Q6ICC1, Q6PIX0, A4FTW3, P62269, Q6P3U5, O95858, Q12841, Q8WYG8, O15026, Q9HCP4, Q96IP9, Q9GZW2, A2RRC2, Q05BX2, Q9H910, Q3ZCS4, A1L186, Q9NZ81, Q12966, A0PJJ5, A0N6Y5, Q9H079, Q6ZV54, Q6ZNS4, Q59GH2, Q96K99, Q38IJ5, Q9UQL0, A0PJ51, Q0VGB5, A0T1T0, Q9H6V5, Q6MZU4, Q86XN7, A0AVH1, A1L0W4, Q32P56, O60310, Q659G6, Q9BQS8, Q14BM2, Q9BV81, Q3L6K5, Q9P0F3, Q542Z6, Q0P618, Q2VPA3, Q68CX2, P48454, A1L1A9, Q6PJE6, Q6TDC3, A1A5C3, Q05CT0, Q9P199, P36578, Q0IIN7, Q6PJ46, A3KME8, O43567, Q5I0G1, Q9NQL2, Q86Z03, Q05CI5, Q96BX3, Q9NPN3, A1L0S7, A0PJ82, Q6IAN3, Q4LE52, O94928, Q5XG91, A1L1B9, Q53EW6, Q6PJR6, A0AUW3, Q96C19, Q9NX31, Q53YP0, Q9H8U3, Q04842, Q8N0W5, Q05BE6, Q1WWL6, Q7Z585, Q9P164, Q6N0B1, P20674, Q86W39, Q53F39, A0PJ75, Q9BT23, Q4LE41, Q59G41, Q9UJ78, Q86XZ4, P11234, Q9H0V5, Q96N19, A2IBT1, Q503B5, Q9H8L3, Q8NDC0, A1L159, A1L307, Q8IZQ1, A1JUI9, Q6QIX4, Q0VGE4, Q9BRW1, Q68DB0, Q96GC9, A0PJG2, Q6P2M7, Q68CK3, Q9BU79, P62899, Q49AG5, Q8N8E1, Q6PCB0, Q6UXG2, Q53FV3, Q05CY1, Q05DH2, P50290, Q05DM8, P62891, Q7Z422, Q2YDX2, Q8NEZ9, A0SEH4, Q05DV5, Q13145, Q05C06, Q9BW21, Q53XP3, Q59ED6, Q8IUI8, Q69YJ5, P60006, Q6FHY4, Q6P2R5, Q6ZRF1, Q6IBI8, A2RRL9, Q49AG2, Q3KQV7, A1L3W2, P62917, Q6IAR2, Q9H8J5, Q8TCR4, Q9BW85, Q8N3P4, O15040, O00165, Q9H8S9, Q14BN2, O94945, Q71RE8, P46783, Q59HE8, Q2TU81, Q08AK7, Q15040, A2RRD3, P61927, Q659F8, Q4KN17, Q4W4X8, O75406, P05114, Q8NDT0, A2RTY9, A2TJK5, A1L199, A2RTZ3, A0JLT3, P42766, Q9H3L0, Q6ZS17, Q68VJ4, A1L4Q1, Q15053, O94820, Q9BVK8, Q6ZW32, P62888, Q05BL1, P62266, O00145, Q7Z345, Q0VD81, Q49AF1, Q59GW9, O60321, Q6ZW10, A2RRM2, O95950, Q8TBE5, Q4ZG56, A0PJH3, Q08ET8, Q15447, Q7Z4L4, Q9BTE1, Q24JS4, A2RU15, Q53GA7, Q12900, Q59EU6, Q9HBI5, Q9P0N2, Q0VD96, Q6FHX0, Q96F15, Q566Q2, P61313, Q8IX05, O02922, P63220, Q5XKB6, Q96AJ1, A2IXV4, Q9ULU1, P14406, Q9H0Q0, Q0P646, P63244, Q6EHZ2, Q6IPZ0, O00547, P60866, A2VDF2, O15412, O75141, Q8N7I0, A4CZ08, Q6TV07, Q549M8, Q9H2V5, A0PJ71, Q6ZSJ2, A2RU75, Q53GX9, P49006, P02545, Q05C49, O00236, Q540G1, O43795, Q96IY7, Q66K30,

Q5D0K4, Q68EN7, P40429, A2RUN2, P18621, Q6ZMY8, Q53F40, Q9BSH9, Q9HC03, A1L0V1, Q6IBB3, Q9GZZ7, Q6NYC6, Q9Y247, P46776, A2RU93, Q8N8Q9, P62273, Q53G27, Q9BXL8, A0JLT9, Q13425, Q13410, Q6IN85, O75139, A2RRE2, Q3B7K5, Q659D8, O60498, A1A528, Q9Y6H1, Q92478, Q96JI7, Q9BXS2, A0JLU4, O02923, Q9HAI6, Q14693, Q9HB72, A2RRQ2, Q15532, Q59FS0, Q53F28, Q6FIF5, A0A5E5, Q658M8, Q9H9V4, Q05BS8, O95645, P15941, A0PJD1, Q96I57, A0MWC9, Q14CS0, Q0VDJ6, Q9UI61, Q3ZTT3, P25398, Q99627, O76095, Q0IJ49, Q6ZWT7, Q6ZSC8, Q9P0V8, O75071, A1L3W4, Q59H22, O95608, Q53GW4, A2RU51, Q05CA7, P57737, Q569H2, Q9BUA6, Q6TFL4, Q3ZTR9, Q02543, A2RU94, Q6AWB6, Q9H051, P27635, Q9BW72, Q9H4A6, Q05BP9, Q08AL5, Q15789, A2N6W9, P46779, O95704, Q53GD1, Q3ZCM5, Q63HJ6, Q96GX3, O00478, Q04197, O19682, Q5MJQ4, O60268, Q307T1, A2NHL8, Q8N2J9, A1L1A2, Q5YLC1, A1L469, Q53F37, P15880, O95359, Q59EV5, A1YBP2, Q5GIA6, Q24JS2, A0N0L5, Q8NHP6, P26373, Q6ZUR0, A1KYQ8, Q9UMY1, Q3KRB6, A2RU67, Q05D91, Q6IA88, P62241, Q53F25, Q07108, Q4V9L7

-- 24 of 1834--

GOID GO:0043065

TERM positive regulation of apoptosis

P-VALUE 2.71296004434145e-11

CORRECTED P-VALUE 4.97556872132221e-08

NUM\_ANNOTATIONS 47 (of 370)

ANNOTATED\_GENES Q9UK73, P55212, P41182, O75940, Q9Y2A4, Q04721, Q15628, P62753, O75411, Q92736, P01137, P61247, O60238, Q12981, Q96P20, O14781, O60603, P50570, P78560, Q02535, O14727, O00291, Q13794, Q9P0J0, Q13232, Q9ULZ3, P68371, P07437, Q02779, Q99698, P55211, P28908, Q06187, Q06945, Q9Y3A2, Q9C000, O43557, O15519, P28482, P38936, P10600, O15304, O60356, P23396, Q16611, O75489, P08575

-- 25 of 1834--

GOID GO:0043068

TERM positive regulation of programmed cell death

P-VALUE 3.94405154021292e-11

CORRECTED P-VALUE 7.2333905247505e-08

NUM\_ANNOTATIONS 47 (of 374)

ANNOTATED\_GENES Q9UK73, P55212, P41182, O75940, Q9Y2A4, Q04721, Q15628, P62753, O75411, Q92736, P01137, P61247, O60238, Q12981, Q96P20, O14781, O60603, P50570, P78560, Q02535, O14727, O00291, Q13794, Q9P0J0, Q13232, Q9ULZ3, P68371, P07437, Q02779, Q99698, P55211, P28908, Q06187,

Q06945, Q9Y3A2, Q9C000, O43557, O15519, P28482, P38936, P10600, O15304, O60356, P23396, Q16611, O75489, P08575

-- 26 of 1834--

GOID GO:0031325

TERM positive regulation of cellular metabolic process

P-VALUE 6.90241248688416e-11

CORRECTED P-VALUE 1.26590245009455e-07

NUM\_ANNOTATIONS 72 (of 738)

ANNOTATED\_GENES Q15306, Q9HCS4, Q04771, Q12951, P01137, Q04864, Q99967, Q13263, P48552, P31749, Q12905, Q13772, P43405, Q96GM5, P15036, Q99607, P28908, P61088, O00468, Q13422, P08651, Q9Y366, P15923, Q01196, Q9BZQ8, P17947, Q16621, O14497, P62330, O15085, P08238, P68871, P17096, P07948, P18850, P56211, P46734, Q03014, P18848, P10636, Q12830, Q12778, P19438, P35269, P62826, P08069, P33681, O75586, O43847, Q9UHK0, Q15788, P10914, P40425, P62701, Q06413, P55317, P30281, Q06945, P51692, P60981, Q9NVC6, P62988, Q02930, Q9BRP0, P14317, P29375, P42226, Q12906, P19419, O75925, O15516, P32519

-- 27 of 1834--

GOID GO:0051128

TERM regulation of cellular component organization

P-VALUE 7.4808571802439e-11

CORRECTED P-VALUE 1.37198920685673e-07

NUM\_ANNOTATIONS 47 (of 381)

ANNOTATED\_GENES O15511, Q14344, Q8IXS6, Q86UE8, Q9UJH8, O95425, P50897, P17081, P10636, Q9ULR5, P27816, P01137, O60739, P47756, Q15056, Q01105, P63165, P15311, O15145, O15371, O00303, Q9H3Q1, O00291, P31146, P35241, P55010, P61158, Q13796, O75366, P60953, P61088, Q9NP74, O00468, P60981, Q01082, P30273, P62988, P09429, O15144, P11277, P41567, P62330, Q9BPX5, P10600, O00453, P17096, Q13542

-- 28 of 1834--

GOID GO:0006366

TERM transcription from RNA polymerase II promoter

P-VALUE 8.14280843952534e-11

CORRECTED P-VALUE 1.49339106780895e-07

NUM\_ANNOTATIONS 83 (of 912)

ANNOTATED\_GENES P50750, P41182, Q06546, Q9HCS4, Q96BD5, Q06547, Q14469, P05549, P01137, Q16633, Q99967, Q13263, P48552, P12757, Q02535,

P16989, O14646, Q96GM5, Q99607, O15054, Q15545, O00472, O00468, Q13422, P08651, Q01196, P17947, P09429, Q16621, P17275, P35227, P07737, P61244, P42224, P09630, P18850, P17535, P49716, Q03014, P23511, P23771, P18848, P61925, Q12830, Q12778, P19438, P35269, P40763, Q15326, O75586, Q9UHK0, P20290, P14316, P01100, P04179, Q01658, P10914, P40425, P53999, Q92754, P50549, Q06413, Q9NZU5, P55317, P56270, P62263, P51692, Q13207, Q9NVC6, Q02930, Q14494, O00422, P29375, Q99732, P42226, P19419, Q14241, Q12968, P51532, P24468, O15516, P32519, Q12824

-- 29 of 1834--

GOID GO:0032268

TERM regulation of cellular protein metabolic process

P-VALUE 1.56772329075638e-10

CORRECTED P-VALUE 2.8752045152472e-07

NUM\_ANNOTATIONS 46 (of 376)

ANNOTATED\_GENES O15511, O95425, P10636, Q9ULR5, P27816, P01137, O60739, P47756, Q15056, Q01105, P46782, P33681, P31749, P06730, Q8NEJ9, O15145, O43847, O15371, O00303, P26045, P43405, Q9P0J0, P35241, P55010, P62701, P61158, Q13796, O75366, P62341, P61088, Q9Y366, P30281, Q96KC8, P60981, Q01082, Q9H074, O75807, Q9BZQ8, O15144, P11277, P41567, P14317, P62330, Q9BPX5, P07948, Q13542

-- 30 of 1834--

GOID GO:0015980

TERM energy derivation by oxidation of organic compounds

P-VALUE 1.87949970782168e-10

CORRECTED P-VALUE 3.44700246414497e-07

NUM\_ANNOTATIONS 26 (of 139)

ANNOTATED\_GENES P35573, P07919, P40925, O75390, P21912, P50213, P62140, P22695, Q12887, P31930, P06737, P13807, Q9UQK1, P28331, P14927, Q13423, P17174, O43837, P31749, P40926, P08237, O95278, P99999, Q12968, Q16821, P11177

-- 31 of 1834--

GOID GO:0006917

TERM induction of apoptosis

P-VALUE 2.27130463787685e-10

CORRECTED P-VALUE 4.16557270586615e-07

NUM\_ANNOTATIONS 40 (of 302)

ANNOTATED\_GENES Q9UK73, P55212, O75940, Q9Y2A4, Q04721, Q15628, O75411, Q92736, P61247, P01137, O60238, Q12981, Q96P20, O14781, O60603, P78560, O14727, Q13794, O00291, Q9P0J0, Q13232, Q9ULZ3, P68371, P07437, Q02779, Q99698, Q06187, Q9Y3A2, O43557, O15519, Q9C000, P28482, P38936, P10600, O15304, O60356, P23396, Q16611, O75489, P08575

-- 32 of 1834--

GOID GO:0012502

TERM induction of programmed cell death

P-VALUE 2.51097513766974e-10

CORRECTED P-VALUE 4.6051284024863e-07

NUM\_ANNOTATIONS 40 (of 303)

ANNOTATED\_GENES Q9UK73, P55212, O75940, Q9Y2A4, Q04721, Q15628, O75411, Q92736, P61247, P01137, O60238, Q12981, Q96P20, O14781, O60603, P78560, O14727, Q13794, O00291, Q9P0J0, Q13232, Q9ULZ3, P68371, P07437, Q02779, Q99698, Q06187, Q9Y3A2, O43557, O15519, Q9C000, P28482, P38936, P10600, O15304, O60356, P23396, Q16611, O75489, P08575

-- 33 of 1834--

GOID GO:0044419

TERM interspecies interaction between organisms

P-VALUE 2.51097513766974e-10

CORRECTED P-VALUE 4.6051284024863e-07

NUM\_ANNOTATIONS 40 (of 303)

ANNOTATED\_GENES P31785, Q13177, Q12959, O00499, P19438, P01137, O60238, Q15056, P62826, P40763, P61978, P33681, O75970, P27449, P08727, P21796, P06730, P08631, O00308, P05783, P61073, P12235, P25963, P05388, P63279, P43405, O75164, P06241, O15519, P28482, P53618, O00571, O15304, P12236, O60506, P42224, P05141, P07948, P17096, Q12824

-- 34 of 1834--

GOID GO:0009893

TERM positive regulation of metabolic process

P-VALUE 2.87846874890324e-10

CORRECTED P-VALUE 5.27911168548855e-07

NUM\_ANNOTATIONS 72 (of 762)

ANNOTATED\_GENES Q15306, Q9HCS4, Q04771, Q12951, P01137, Q04864, Q99967, Q13263, P48552, P31749, Q12905, Q13772, P43405, Q96GM5, P15036, Q99607, P28908, P61088, O00468, Q13422, P08651, Q9Y366, P15923, Q01196, Q9BZQ8, P17947, Q16621, O14497, P62330, O15085, P08238, P68871, P17096,

P07948, P18850, P56211, P46734, Q03014, P18848, P10636, Q12830, Q12778, P19438, P35269, P62826, P08069, P33681, O75586, O43847, Q9UHK0, Q15788, P10914, P40425, P62701, Q06413, P55317, P30281, Q06945, P51692, P60981, Q9NVC6, P62988, Q02930, Q9BRP0, P14317, P29375, P42226, Q12906, P19419, O75925, O15516, P32519

-- 35 of 1834--

GOID GO:0008283

TERM cell proliferation

P-VALUE 3.18967831901645e-10

CORRECTED P-VALUE 5.84987003707617e-07

NUM\_ANNOTATIONS 94 (of 1118)

ANNOTATED\_GENES P50750, Q15555, P41182, P09758, Q12959, P50281, Q9UFF9, P55273, Q00577, Q14469, O75411, P01137, Q9P1W9, P56545, O75995, P61073, P25963, P31146, P43405, P40818, Q99607, P46781, P06748, P55209, P28908, P36955, P54852, Q9NPF2, O43251, Q14106, P31949, O43557, P10071, P38936, P49759, P30556, P10600, P25942, Q96FS4, P15153, P84095, P43307, P07948, P35226, Q03014, P25025, Q969H8, O14494, O00499, Q04721, P33552, Q12778, P21127, P25705, P42677, P08069, P62324, Q15326, O75563, O14781, O43847, P09619, P43490, Q08722, P14316, P04179, P53350, P11309, P41240, Q14289, P62701, Q13418, O75474, P13164, Q06945, P51692, Q13207, O95751, P08620, Q9BRP0, Q12999, P47974, P62244, P14317, P00491, O00453, P04899, Q15303, P01111, Q9GZP9, P42226, Q16611, P08575, Q12824

-- 36 of 1834--

GOID GO:0043933

TERM macromolecular complex subunit organization

P-VALUE 3.32990960454719e-10

CORRECTED P-VALUE 6.10705421473954e-07

NUM\_ANNOTATIONS 88 (of 1020)

ANNOTATED\_GENES Q93077, O15511, P50750, O00505, P35609, P62314, Q9ULR5, P27816, O60739, P61247, P63165, P32320, P46782, Q14118, P06730, O15145, O15371, Q07157, Q93079, Q30201, P68431, O00291, P31146, P43405, P07437, Q13247, Q13796, P06748, P55209, O95405, Q15545, O00468, Q01082, Q9H074, O15144, P09429, Q16621, Q9H853, P41567, P62330, Q9BPX5, P25942, O15533, P23396, P08237, Q15459, P17096, P0C0S5, P62304, Q13243, Q13542, O75940, Q9Y221, O43516, O95425, P10636, P84243, P35269, P47756, Q15056, Q01105, P08069, Q96P20, O75563, P68363, O00303, P42768, P35241, O75251, Q14289, P55010, P61158, O75366, P68371, P13498, P60953, P68366, P16104,

P56270, Q12887, O75494, P62263, P60981, Q92522, Q9NVC6, P08708, P11277, P30566

-- 37 of 1834--

GOID GO:0010604

TERM +positive regulation of macromolecule metabolic process

P-VALUE 4.17602369918893e-10

CORRECTED P-VALUE 7.65882746431251e-07

NUM\_ANNOTATIONS 69 (of 722)

ANNOTATED\_GENES Q15306, Q9HCS4, Q04771, Q12951, P01137, Q04864, Q99967, Q13263, P48552, P31749, Q12905, Q13772, P43405, Q96GM5, P15036, Q99607, P28908, P61088, O00468, Q13422, P08651, Q9Y366, P15923, Q01196, Q9BZQ8, P17947, Q16621, O14497, P62330, O15085, P17096, P07948, P18850, P46734, Q03014, P18848, P10636, Q12830, Q12778, P19438, P35269, P62826, P08069, P33681, O75586, O43847, Q9UHK0, Q15788, P10914, P40425, P62701, Q06413, P55317, P30281, Q06945, P51692, P60981, Q9NVC6, P62988, Q02930, Q9BRP0, P14317, P29375, P42226, Q12906, P19419, O15516, O75925, P32519

-- 38 of 1834--

GOID GO:0010604 + macromolecule metabolic process

TERM positive regulation of macromolecule metabolic process

P-VALUE 4.17602369918893e-10

CORRECTED P-VALUE 7.65882746431251e-07

NUM\_ANNOTATIONS 69 (of 722)

ANNOTATED\_GENES Q15306, Q9HCS4, Q04771, Q12951, P01137, Q04864, Q99967, Q13263, P48552, P31749, Q12905, Q13772, P43405, Q96GM5, P15036, Q99607, P28908, P61088, O00468, Q13422, P08651, Q9Y366, P15923, Q01196, Q9BZQ8, P17947, Q16621, O14497, P62330, O15085, P17096, P07948, P18850, P46734, Q03014, P18848, P10636, Q12830, Q12778, P19438, P35269, P62826, P08069, P33681, O75586, O43847, Q9UHK0, Q15788, P10914, P40425, P62701, Q06413, P55317, P30281, Q06945, P51692, P60981, Q9NVC6, P62988, Q02930, Q9BRP0, P14317, P29375, P42226, Q12906, P19419, O15516, O75925, P32519

-- 39 of 1834--

GOID GO:0006916

TERM anti-apoptosis

P-VALUE 4.23483149775744e-10

CORRECTED P-VALUE 7.76668096688714e-07

NUM\_ANNOTATIONS 33 (of 222)

ANNOTATED\_GENES P21580, O95379, P49768, Q04721, Q12778, Q9NQS1, P55273, O15392, P52565, O60238, Q9P1W9, Q12981, P63104, P08069, Q07820, Q99967, P31749, O60936, Q12982, Q9BZZ5, P11021, P06748, Q06413, Q13075, O95865, P51692, O95817, P09429, O15519, O00257, Q9UBN6, P14625, P13693

-- 40 of 1834--

GOID GO:0042274

TERM ribosomal small subunit biogenesis

P-VALUE 4.38044857381776e-10

CORRECTED P-VALUE 8.03374268438177e-07

NUM\_ANNOTATIONS 8 (of 10)

ANNOTATED\_GENES P62753, P62857, P39019, P62847, P08708, P62249, P62081, P62263

-- 41 of 1834--

GOID GO:0031328

TERM positive regulation of cellular biosynthetic process

P-VALUE 4.82091173713529e-10

CORRECTED P-VALUE 8.84155212590612e-07

NUM\_ANNOTATIONS 63 (of 633)

ANNOTATED\_GENES P46734, Q15306, Q03014, Q9HCS4, Q04771, Q12830, P18848, Q12951, Q12778, P19438, P01137, P35269, Q04864, P62826, P08069, Q99967, Q13263, P48552, P33681, P31749, O75586, Q12905, Q9UHK0, Q15788, Q13772, P43405, P10914, P40425, Q96GM5, P62701, P15036, Q99607, Q06413, P55317, P28908, O00468, Q13422, P08651, P15923, Q06945, P51692, Q9NVC6, Q01196, P62988, Q02930, Q9BZQ8, P17947, Q9BRP0, Q16621, O14497, P29375, O15085, Q12906, P42226, P19419, P08238, P68871, P17096, O75925, P18850, P56211, O15516, P32519

-- 42 of 1834--

GOID GO:0022613

TERM ribonucleoprotein complex biogenesis and assembly

P-VALUE 5.41052880386943e-10

CORRECTED P-VALUE 9.92290982629654e-07

NUM\_ANNOTATIONS 39 (of 298)

ANNOTATED\_GENES O75940, Q9Y221, P62314, Q9ULR5, P62753, P09234, O60739, P61247, Q15056, P46782, Q9NPE3, P39019, P06730, O15371, O00303, P62857, P05388, P62847, P62249, P55010, Q13247, P18124, P06748, P18077, P62263, O75494, Q9H074, Q9Y3A2, P62913, P08708, P55769, P41567, Q9UHA3, P62081, P23396, Q15459, P62304, Q13243, Q13542

-- 43 of 1834--

GOID GO:0031324

TERM negative regulation of cellular metabolic process

P-VALUE 6.23452025499367e-10

CORRECTED P-VALUE 1.14341101476584e-06

NUM\_ANNOTATIONS 67 (of 698)

ANNOTATED\_GENES P41182, Q06546, Q9HCS4, Q96BD5, Q9ULR5, P27816, P55273, Q00577, Q14469, P01137, P63165, P32320, O75427, Q99967, P48552, Q02535, P16989, Q9P0J0, Q13796, O15054, Q9Y576, Q13422, P08651, Q03989, O43251, Q96KC8, Q01082, P31949, Q9BZQ8, P09429, P17947, P10071, P35227, P38936, P23396, P17096, Q13542, Q03014, O95425, P10636, P61925, Q12830, P47756, Q01105, P40763, Q15326, P14316, P26045, Q01658, Q53EL6, P63279, P62277, O75190, O15534, P35241, O75366, P55055, Q06413, Q9NZU5, P62263, O75494, Q13207, Q9BRP0, P11277, P27348, O75943, Q12906

-- 44 of 1834--

GOID GO:0009891

TERM positive regulation of biosynthetic process

P-VALUE 7.02935865765743e-10

CORRECTED P-VALUE 1.28918437781437e-06

NUM\_ANNOTATIONS 63 (of 639)

ANNOTATED\_GENES P46734, Q15306, Q03014, Q9HCS4, Q04771, Q12830, P18848, Q12951, Q12778, P19438, P01137, P35269, Q04864, P62826, P08069, Q99967, Q13263, P48552, P33681, P31749, O75586, Q12905, Q9UHK0, Q15788, Q13772, P43405, P10914, P40425, Q96GM5, P62701, P15036, Q99607, Q06413, P55317, P28908, O00468, Q13422, P08651, P15923, Q06945, P51692, Q9NVC6, Q01196, P62988, Q02930, Q9BZQ8, P17947, Q9BRP0, Q16621, O14497, P29375, O15085, Q12906, P42226, P19419, P08238, P68871, P17096, O75925, P18850, P56211, O15516, P32519

-- 45 of 1834--

GOID GO:0009892

TERM negative regulation of metabolic process

P-VALUE 7.9219508366258e-10

CORRECTED P-VALUE 1.45288578343717e-06

NUM\_ANNOTATIONS 69 (of 733)

ANNOTATED\_GENES P41182, Q06546, Q9HCS4, Q96BD5, Q9ULR5, P27816, P55273, Q00577, Q14469, P01137, O60238, P63165, P32320, O75427, Q99967, P48552, Q02535, P16989, Q9P0J0, P98179, Q13796, O15054, Q9Y576, Q13422,

P08651, Q03989, O43251, Q96KC8, Q01082, P31949, Q9BZQ8, P09429, P17947, P10071, P35227, P38936, P23396, P17096, Q13542, Q03014, O95425, P10636, P61925, Q12830, P47756, Q01105, P40763, Q15326, P14316, P26045, Q01658, Q53EL6, P63279, P62277, O75190, O15534, P35241, O75366, P55055, Q06413, Q9NZU5, P62263, O75494, Q13207, Q9BRP0, P11277, P27348, O75943, Q12906

-- 46 of 1834--

GOID GO:0065008

TERM regulation of biological quality

P-VALUE 1.12392083047483e-09

CORRECTED P-VALUE 2.06127080309084e-06

NUM\_ANNOTATIONS 127 (of 1720)

ANNOTATED\_GENES O15511, Q14344, Q01543, P41182, Q13177, Q8IXS6, Q15014, P55273, P32246, P40424, Q92736, P01137, P32320, P28331, P46782, P08195, P25098, O75995, P39019, P31749, O15145, P61073, Q13162, Q30201, P12235, Q9H3Q1, P25963, P02686, P31146, Q9P0J0, P61106, Q13796, Q9Y691, P51575, O00468, O00329, P54852, P01009, P29992, Q9UN86, Q01082, O76003, O15144, O43557, P17947, Q16621, P50150, P38936, P30556, P62330, Q9BPX5, P10600, Q07001, P25942, Q96FS4, O15085, P08237, P17844, P68871, P07948, Q01453, P46597, P10124, P08123, O43315, Q6NYC1, Q92506, P50897, O95425, P49768, P17081, Q04721, P62753, O75787, P47756, P06737, P21127, Q07820, P62324, P15311, Q8IXI2, Q15084, P46092, O95461, Q8NBQ5, Q13310, P62847, P04179, P42768, P63302, P35241, P61158, O75366, P62341, P55317, Q9NP74, P31358, P33947, O60383, P62263, P60981, P51692, P62988, P30273, P08620, P38435, P08708, P11277, P14317, Q86Z22, P17174, O95977, P32245, P14625, O00453, O60356, P30679, Q9NSE2, Q9GZP9, O43838, O75489, Q16611, P13693, P50148, P08575, P06576, Q7L1T6

-- 47 of 1834--

GOID GO:0010605

TERM -negative regulation of macromolecule metabolic process

P-VALUE 1.22128958555716e-09

CORRECTED P-VALUE 2.23984509991184e-06

NUM\_ANNOTATIONS 66 (of 694)

ANNOTATED\_GENES P41182, Q06546, Q9HCS4, Q96BD5, Q9ULR5, P27816, Q00577, Q14469, P01137, O60238, P63165, O75427, Q99967, P48552, Q02535, P16989, Q9P0J0, P98179, Q13796, O15054, Q9Y576, Q13422, P08651, Q03989, O43251, Q96KC8, Q01082, P31949, Q9BZQ8, P09429, P17947, P10071, P35227, P23396, P17096, Q13542, Q03014, O95425, P10636, P61925, Q12830, P47756, Q01105, P40763, Q15326, P14316, P26045, Q01658, Q53EL6, P63279, P62277,

O75190, O15534, P35241, O75366, P55055, Q06413, Q9NZU5, P62263, O75494, Q13207, Q9BRP0, P11277, P27348, O75943, Q12906

-- 48 of 1834--

GOID GO:0010605 - macromolecule metabolic process

TERM negative regulation of macromolecule metabolic process

P-VALUE 1.22128958555716e-09

CORRECTED P-VALUE 2.23984509991184e-06

NUM\_ANNOTATIONS 66 (of 694)

ANNOTATED\_GENES P41182, Q06546, Q9HCS4, Q96BD5, Q9ULR5, P27816, Q00577, Q14469, P01137, O60238, P63165, O75427, Q99967, P48552, Q02535, P16989, Q9P0J0, P98179, Q13796, O15054, Q9Y576, Q13422, P08651, Q03989, O43251, Q96KC8, Q01082, P31949, Q9BZQ8, P09429, P17947, P10071, P35227, P23396, P17096, Q13542, Q03014, O95425, P10636, P61925, Q12830, P47756, Q01105, P40763, Q15326, P14316, P26045, Q01658, Q53EL6, P63279, P62277, O75190, O15534, P35241, O75366, P55055, Q06413, Q9NZU5, P62263, O75494, Q13207, Q9BRP0, P11277, P27348, O75943, Q12906

-- 49 of 1834--

GOID GO:0022900

TERM electron transport chain

P-VALUE 1.82524585869436e-09

CORRECTED P-VALUE 3.34750090484545e-06

NUM\_ANNOTATIONS 25 (of 143)

ANNOTATED\_GENES P07919, O75746, P13498, P21912, O15239, P22695, Q12887, P31930, O00483, O75306, P28331, O95169, P14927, P19404, P49447, O43676, O75489, P99999, O43674, P10109, P51970, P04179, P47985, Q9P0J0, O75251

-- 50 of 1834--

GOID GO:0051246

TERM regulation of protein metabolic process

P-VALUE 1.82696111598736e-09

CORRECTED P-VALUE 3.35064668672081e-06

NUM\_ANNOTATIONS 53 (of 505)

ANNOTATED\_GENES O15511, O95425, P10636, Q9ULR5, P27816, O75787, P01137, O60739, P62253, P47756, Q15056, Q01105, P46782, P33681, P31749, P06730, Q8NEJ9, O15145, O43847, O15371, O00303, P26045, P63279, P43405, P63146, Q9P0J0, P35241, P55010, P62701, P61158, Q13796, O75366, P62341, P61088, P49459, P61077, Q9Y366, P30281, Q96KC8, P60981, Q01082, Q9H074,

O75807, Q9BZQ8, O15144, P11277, P41567, P14317, P62330, Q9BPX5, P07948, Q13542, P62837

-- 51 of 1834--

GOID GO:0000375

TERMRNA splicing, via transesterification reactions

P-VALUE 1.86723195694024e-09

CORRECTED P-VALUE 3.4245034090284e-06

NUM\_ANNOTATIONS 19 (of 84)

ANNOTATED\_GENES Q13247, P31942, P07910, O75940, P09651, P62314, O75494, Q9UK45, P09234, Q01081, Q15427, O00148, Q92620, Q13595, Q15459, P52272, Q13243, P62304, P62995

-- 52 of 1834--

GOID GO:0000377

TERMRNA splicing, via transesterification reactions with bulged adenosine as nucleophile

P-VALUE 1.86723195694024e-09

CORRECTED P-VALUE 3.4245034090284e-06

NUM\_ANNOTATIONS 19 (of 84)

ANNOTATED\_GENES Q13247, P31942, P07910, O75940, P09651, P62314, O75494, Q9UK45, P09234, Q01081, Q15427, O00148, Q92620, Q13595, Q15459, P52272, Q13243, P62304, P62995

-- 53 of 1834--

GOID GO:0000398

TERM nuclear mRNA splicing, via spliceosome

P-VALUE 1.86723195694024e-09

CORRECTED P-VALUE 3.4245034090284e-06

NUM\_ANNOTATIONS 19 (of 84)

ANNOTATED\_GENES Q13247, P31942, P07910, O75940, P09651, P62314, O75494, Q9UK45, P09234, Q01081, Q15427, O00148, Q92620, Q13595, Q15459, P52272, Q13243, P62304, P62995

-- 54 of 1834--

GOID GO:0006357

TERM regulation of transcription from RNA polymerase II promoter

P-VALUE 5.032282288781e-09

CORRECTED P-VALUE 9.22920571762435e-06

NUM\_ANNOTATIONS 66 (of 719)

ANNOTATED\_GENES P41182, Q06546, Q9HCS4, Q96BD5, Q06547, Q14469, P05549, P01137, Q99967, Q13263, P48552, Q02535, P16989, O14646, Q96GM5, Q99607, O15054, O00468, Q13422, P08651, Q01196, P17947, P09429, Q16621, P17275, P35227, P07737, P09630, P18850, P17535, Q03014, P18848, P61925, Q12830, Q12778, P19438, P40763, Q15326, O75586, Q9UHK0, P14316, P01100, Q01658, P04179, P10914, P40425, Q92754, P53999, Q06413, P55317, Q9NZU5, P62263, P51692, Q13207, Q9NVC6, O00422, Q99732, P42226, P19419, Q14241, P51532, P24468, Q12968, O15516, Q12824, P32519

-- 55 of 1834--

GOID GO:0010557

TERM+positive regulation of macromolecule biosynthetic process

P-VALUE 5.24622557954354e-09

CORRECTED P-VALUE 9.62157771288285e-06

NUM\_ANNOTATIONS 59 (of 611)

ANNOTATED\_GENES P46734, Q15306, Q03014, Q9HCS4, Q04771, Q12830, P18848, Q12951, Q12778, P19438, P01137, P35269, Q04864, P62826, P08069, Q99967, Q13263, P48552, P33681, O75586, Q12905, Q9UHK0, Q15788, Q13772, P43405, P10914, P40425, Q96GM5, P62701, P15036, Q99607, Q06413, P55317, P28908, O00468, Q13422, P08651, P15923, Q06945, P51692, Q9NVC6, Q01196, P62988, Q02930, Q9BZQ8, P17947, Q9BRP0, Q16621, O14497, P29375, O15085, Q12906, P42226, P19419, P17096, O75925, P18850, O15516, P32519

-- 56 of 1834--

GOID GO:0010557 + macromolecule biosynthetic process

TERM positive regulation of macromolecule biosynthetic process

P-VALUE 5.24622557954354e-09

CORRECTED P-VALUE 9.62157771288285e-06

NUM\_ANNOTATIONS 59 (of 611)

ANNOTATED\_GENES P46734, Q15306, Q03014, Q9HCS4, Q04771, Q12830, P18848, Q12951, Q12778, P19438, P01137, P35269, Q04864, P62826, P08069, Q99967, Q13263, P48552, P33681, O75586, Q12905, Q9UHK0, Q15788, Q13772, P43405, P10914, P40425, Q96GM5, P62701, P15036, Q99607, Q06413, P55317, P28908, O00468, Q13422, P08651, P15923, Q06945, P51692, Q9NVC6, Q01196, P62988, Q02930, Q9BZQ8, P17947, Q9BRP0, Q16621, O14497, P29375, O15085, Q12906, P42226, P19419, P17096, O75925, P18850, O15516, P32519

-- 57 of 1834--

GOID GO:0033036

TERM macromolecule localization

P-VALUE 5.27193909219632e-09  
CORRECTED P-VALUE 9.66873629508805e-06  
NUM\_ANNOTATIONS 102 (of 1320)  
ANNOTATED\_GENES P41182, P09651, Q8IXS6, O00505, O00203, Q92624, O95486, O00161, P01137, Q96T51, O60896, P63165, Q96IW7, O00628, P84077, P49755, P31749, P05783, P51153, P25963, P63010, Q9H0V9, Q9P0J0, P61106, Q9ULZ3, Q13796, Q92838, P06748, O95405, O15117, O14925, Q9NPF2, O94979, P49754, P61326, Q96KC8, Q9Y3E0, Q9UN86, Q01082, Q12907, O43557, Q13596, P62913, P10071, O00560, P12830, Q9H9H4, P62330, P10600, P08240, P51149, O15126, Q15771, Q9HC62, P43307, Q13636, Q15629, P10124, Q03014, O43747, P50897, P61925, Q9H902, P62826, Q96P20, P15311, Q96P71, Q7LBR1, P55735, Q6UWC1, P27824, P43308, P35241, P35606, Q99698, P60468, P33947, Q9Y5J9, O75494, Q03518, Q9Y6X1, P30040, O60684, O00148, P51571, Q15027, P98160, P53618, O00629, P14625, Q9UKK6, Q9Y5L0, O60763, P50395, P61619, P31946, Q9GZP9, P62829, Q13277, Q15363, P61586, P35658

-- 58 of 1834--

GOID GO:0007242

TERM intracellular signaling cascade

P-VALUE 6.14946135612786e-09  
CORRECTED P-VALUE 1.12781121271385e-05  
NUM\_ANNOTATIONS 156 (of 2306)  
ANNOTATED\_GENES Q14344, P41182, Q14161, P98171, Q9NRJ4, P32246, P01137, Q9H0Z9, Q9P1W9, Q04864, P84077, P48552, P31749, Q8NG66, P61073, Q13162, P53365, P51153, O75689, O94844, P25963, P43405, Q9ULZ3, P98077, Q92609, Q9Y576, O15068, Q15545, P61088, O15117, Q6ZMJ9, Q14790, P29992, Q15759, Q9UN86, O43557, O14497, P30556, P48736, P62330, P25942, P15153, O15085, P23396, Q15771, P07949, P07948, Q13636, Q13542, P08123, P25025, Q86UE8, Q6NYC1, O14494, P50897, P33552, Q15669, O75787, P05771, P29466, O15211, P33681, Q8IXI2, O14727, P04179, Q15788, P28562, P11021, Q02779, P60953, Q9NVC6, P46940, O60503, P28482, P14317, O95977, P04899, O75943, Q99732, P01111, Q9NSE2, Q9GZP9, P50148, O75582, O75925, P29692, P48551, P16885, Q15628, P52565, Q15311, O94989, Q9H3Q1, P99999, Q13794, O00291, Q9NP99, Q07890, P49137, Q13772, Q9P0J0, P61106, O00329, P26651, Q15418, O43251, O95865, Q9Y3E0, Q08AR7, O15519, Q9C000, O00560, P52566, P61225, P10600, Q96FS4, P51149, P84095, O43281, A2RQD6, P42224, Q15438, Q8I WV1, P18850, Q6ZT07, P46734, P21580, P49768, Q04721, P17081, P62753, P19438, Q15208, P62826, P08069, Q07820, P40763, O14781, P21796, Q1ZYL3, P40616, Q9GZY6, Q9H2K8, P55211, Q06187, O43306, P06241, P15498, P51692, P49795, Q15027, P32245, P30679, Q16611, P31689, P61586

-- 59 of 1834--

GOID GO:0045941

TERM positive regulation of transcription

P-VALUE 6.59049348448803e-09

CORRECTED P-VALUE 1.20869650505511e-05

NUM\_ANNOTATIONS 54 (of 539)

ANNOTATED\_GENES P46734, Q15306, Q03014, Q9HCS4, Q04771, Q12830, P18848, Q12951, Q12778, P19438, P01137, P35269, Q04864, P62826, Q99967, Q13263, P48552, P33681, O75586, Q12905, Q9UHK0, Q15788, Q13772, P10914, P40425, Q96GM5, P15036, Q99607, Q06413, P55317, O00468, Q13422, P08651, P15923, Q06945, P51692, Q9NVC6, Q01196, P62988, Q02930, P17947, Q9BRP0, Q16621, O14497, P29375, O15085, Q12906, P42226, P19419, P17096, O75925, P18850, O15516, P32519

-- 60 of 1834--

GOID GO:0034621

TERM cellular macromolecular complex subunit organization

P-VALUE 9.02979554886249e-09

CORRECTED P-VALUE 1.65606450366138e-05

NUM\_ANNOTATIONS 71 (of 810)

ANNOTATED\_GENES Q93077, O15511, P50750, P62314, Q9ULR5, P27816, O60739, P61247, P46782, P06730, O15145, O15371, Q93079, P68431, P31146, P07437, Q13247, Q13796, P06748, P55209, O95405, Q15545, O00468, Q01082, Q9H074, O15144, P09429, Q16621, Q9H853, P41567, P62330, Q9BPX5, P23396, Q15459, P17096, P0C0S5, P62304, Q13243, Q13542, O75940, Q9Y221, O43516, O95425, P10636, P84243, P35269, P47756, Q15056, Q01105, P68363, O00303, P42768, Q14289, P55010, O75251, P35241, P61158, O75366, P68371, P13498, P16104, P56270, P68366, Q12887, P62263, O75494, P60981, Q92522, Q9NVC6, P08708, P11277

-- 61 of 1834--

GOID GO:0045935

TERM positive regulation of nucleobase, nucleoside, nucleotide and nucleic acid metabolic process

P-VALUE 9.48007708967272e-09

CORRECTED P-VALUE 1.73864613824598e-05

NUM\_ANNOTATIONS 56 (of 575)

ANNOTATED\_GENES P46734, Q15306, Q03014, Q9HCS4, Q04771, Q12830, P18848, Q12951, Q12778, P19438, P01137, P35269, Q04864, P62826, P08069,

Q99967, Q13263, P48552, P33681, O75586, Q12905, Q9UHK0, Q15788, Q13772, P10914, Q96GM5, P40425, P15036, Q99607, Q06413, P61088, P55317, O00468, Q13422, P08651, P15923, Q06945, P51692, Q9NVC6, Q01196, P62988, Q02930, P17947, Q9BRP0, Q16621, O14497, P29375, O15085, Q12906, P42226, P19419, P17096, O75925, P18850, O15516, P32519

-- 62 of 1834--

GOID GO:0010628

TERM +positive regulation of gene expression

P-VALUE 1.16402946711374e-08

CORRECTED P-VALUE 2.13483004268659e-05

NUM\_ANNOTATIONS 54 (of 548)

ANNOTATED\_GENES P46734, Q15306, Q03014, Q9HCS4, Q04771, Q12830, P18848, Q12951, Q12778, P19438, P01137, P35269, Q04864, P62826, Q99967, Q13263, P48552, P33681, O75586, Q12905, Q9UHK0, Q15788, Q13772, P10914, P40425, Q96GM5, P15036, Q99607, Q06413, P55317, O00468, Q13422, P08651, P15923, Q06945, P51692, Q9NVC6, Q01196, P62988, Q02930, P17947, Q9BRP0, Q16621, O14497, P29375, O15085, Q12906, P42226, P19419, P17096, O75925, P18850, O15516, P32519

-- 63 of 1834--

GOID GO:0010628 + gene expression

TERM positive regulation of gene expression

P-VALUE 1.16402946711374e-08

CORRECTED P-VALUE 2.13483004268659e-05

NUM\_ANNOTATIONS 54 (of 548)

ANNOTATED\_GENES P46734, Q15306, Q03014, Q9HCS4, Q04771, Q12830, P18848, Q12951, Q12778, P19438, P01137, P35269, Q04864, P62826, Q99967, Q13263, P48552, P33681, O75586, Q12905, Q9UHK0, Q15788, Q13772, P10914, P40425, Q96GM5, P15036, Q99607, Q06413, P55317, O00468, Q13422, P08651, P15923, Q06945, P51692, Q9NVC6, Q01196, P62988, Q02930, P17947, Q9BRP0, Q16621, O14497, P29375, O15085, Q12906, P42226, P19419, P17096, O75925, P18850, O15516, P32519

-- 64 of 1834--

GOID GO:0042127

TERM &regulation of cell proliferation

P-VALUE 1.18989194422458e-08

CORRECTED P-VALUE 2.18226182570788e-05

NUM\_ANNOTATIONS 67 (of 751)

ANNOTATED\_GENES P41182, Q9UFF9, P55273, Q00577, Q14469, O75411, P01137, P56545, O75995, P25963, P31146, P43405, P46781, P06748, P55209, P28908, P54852, Q9NPF2, O43251, Q14106, P31949, P10071, P38936, P30556, P10600, P15153, P84095, P43307, P07948, P35226, Q03014, P25025, O14494, Q969H8, Q04721, Q12778, P08069, P25705, P62324, O75563, O14781, P09619, Q08722, P43490, P04179, P41240, Q14289, P62701, Q13418, P13164, Q06945, P51692, Q13207, O95751, P08620, Q12999, Q9BRP0, P62244, P14317, P00491, P04899, O00453, P01111, P42226, Q9GZP9, P08575, Q12824

-- 65 of 1834--

GOID GO:0006913

TERM nucleocytoplasmic transport

P-VALUE 1.79386317294926e-08

CORRECTED P-VALUE 3.28994505918895e-05

NUM\_ANNOTATIONS 30 (of 219)

ANNOTATED\_GENES P41182, P09651, Q92838, Q03014, P06748, O00505, O95405, O15117, P61925, O75494, Q9UN86, Q01082, P01137, O60684, O43557, P10071, O00148, Q01105, P62826, P12830, Q96P20, P10600, O00629, Q9UKK6, P31749, P62829, P25963, Q9P0J0, P35658, P61586

-- 66 of 1834--

GOID GO:0051169

TERM nuclear transport

P-VALUE 2.21410608200339e-08

CORRECTED P-VALUE 4.06067055439422e-05

NUM\_ANNOTATIONS 30 (of 221)

ANNOTATED\_GENES P41182, P09651, Q92838, Q03014, P06748, O00505, O95405, O15117, P61925, O75494, Q9UN86, Q01082, P01137, O60684, O43557, P10071, O00148, Q01105, P62826, P12830, Q96P20, P10600, O00629, Q9UKK6, P31749, P62829, P25963, Q9P0J0, P35658, P61586

-- 67 of 1834--

GOID GO:0051170

TERM nuclear import

P-VALUE 2.36041929496225e-08

CORRECTED P-VALUE 4.32900898696077e-05

NUM\_ANNOTATIONS 23 (of 139)

ANNOTATED\_GENES P41182, P09651, Q92838, O00505, O95405, O15117, P61925, Q9UN86, Q01082, P01137, O60684, O43557, P10071, P12830, Q96P20, O00629, P10600, P31749, P62829, P25963, Q9P0J0, P35658, P61586

-- 68 of 1834--

GOID GO:0015031

TERM protein transport

P-VALUE 2.60449419786771e-08

CORRECTED P-VALUE 4.77664235888938e-05

NUM\_ANNOTATIONS 89 (of 1135)

ANNOTATED\_GENES P41182, O00505, O00203, Q92624, O95486, O00161, P01137, Q96T51, O60896, Q96IW7, O00628, P84077, P49755, P31749, P05783, P51153, P25963, P63010, Q9H0V9, Q9P0J0, P61106, Q9ULZ3, Q92838, P06748, O95405, O15117, O14925, O94979, P49754, Q96KC8, Q9Y3E0, Q9UN86, Q01082, Q12907, O43557, P62913, Q13596, P10071, O00560, P12830, Q9H9H4, P62330, P10600, P08240, P51149, O15126, Q15771, Q9HC62, P43307, Q13636, Q15629, P10124, O43747, P50897, P61925, P62826, Q96P20, Q96P71, Q7LBR1, P55735, Q6UWC1, P27824, P43308, P35606, Q99698, P60468, P33947, Q9Y5J9, Q03518, Q9Y6X1, P30040, O60684, P51571, Q15027, P53618, P14625, O00629, Q9UKK6, Q9Y5L0, O60763, P50395, P61619, P31946, Q9GZP9, P62829, Q13277, Q15363, P61586, P35658

-- 69 of 1834--

GOID GO:0046907

TERM intracellular transport

P-VALUE 2.60449419786771e-08

CORRECTED P-VALUE 4.77664235888938e-05

NUM\_ANNOTATIONS 89 (of 1135)

ANNOTATED\_GENES P41182, P09651, O00505, O00203, Q92624, O95486, O00161, P01137, O60896, Q96IW7, O00628, P55916, P49755, P31749, P05783, P25963, P63010, Q9H0V9, Q9P0J0, P61106, Q9H4M9, P07437, Q9UBK9, Q92838, P06748, O95405, O15117, O14925, O94979, P49754, Q9UN86, Q01082, O43557, P62913, Q13596, P10071, O00560, Q9H853, P12830, P10600, Q96EK5, P08240, O15533, O15126, Q9HC62, P43307, Q9UHY1, Q15629, O75746, P14649, Q03014, O43516, O43747, P61925, Q01105, P62826, Q96P20, P68363, Q8IXI2, P55735, Q6UWC1, P42768, P43308, P35606, P68371, Q99698, P68366, P60468, P33947, Q9Y5J9, O75494, Q9Y6X1, P30040, O60684, O00148, P51571, P53618, O00629, Q9UKK6, O60763, P61619, P31946, Q9GZP9, P62829, Q16611, Q13277, P45379, P35658, P61586

-- 70 of 1834--

GOID GO:0008104

TERM protein localization

P-VALUE 2.84731594740696e-08  
CORRECTED P-VALUE 5.22197744754436e-05  
NUM\_ANNOTATIONS 96 (of 1259)  
ANNOTATED\_GENES P41182, Q8IXS6, O00505, O00203, Q92624, O95486, O00161, P01137, Q96T51, O60896, P63165, Q96IW7, O00628, P84077, P49755, P31749, P05783, P51153, P25963, P63010, Q9H0V9, Q9P0J0, P61106, Q9ULZ3, Q13796, Q92838, P06748, O95405, O15117, O14925, O94979, P49754, Q96KC8, Q9Y3E0, Q9UN86, Q01082, Q12907, O43557, P62913, Q13596, P10071, O00560, P12830, Q9H9H4, P62330, P10600, P08240, P51149, O15126, Q15771, Q9HC62, P43307, Q13636, Q15629, P10124, O43747, P50897, P61925, Q9H902, P62826, Q96P20, P15311, Q96P71, Q7LBR1, P55735, Q6UWC1, P27824, P43308, P35241, P35606, Q99698, P60468, P33947, Q9Y5J9, Q03518, Q9Y6X1, P30040, O60684, P51571, Q15027, P98160, P53618, P14625, O00629, Q9UKK6, Q9Y5L0, O60763, P50395, P61619, P31946, Q9GZP9, P62829, Q13277, Q15363, P61586, P35658

-- 71 of 1834--

GOID GO:0045184

TERM establishment of protein localization

P-VALUE 3.05770518502655e-08  
CORRECTED P-VALUE 5.60783130933869e-05  
NUM\_ANNOTATIONS 89 (of 1139)  
ANNOTATED\_GENES P41182, O00505, O00203, Q92624, O95486, O00161, P01137, Q96T51, O60896, Q96IW7, O00628, P84077, P49755, P31749, P05783, P51153, P25963, P63010, Q9H0V9, Q9P0J0, P61106, Q9ULZ3, Q92838, P06748, O95405, O15117, O14925, O94979, P49754, Q96KC8, Q9Y3E0, Q9UN86, Q01082, Q12907, O43557, P62913, Q13596, P10071, O00560, P12830, Q9H9H4, P62330, P10600, P08240, P51149, O15126, Q15771, Q9HC62, P43307, Q13636, Q15629, P10124, O43747, P50897, P61925, P62826, Q96P20, Q96P71, Q7LBR1, P55735, Q6UWC1, P27824, P43308, P35606, Q99698, P60468, P33947, Q9Y5J9, Q03518, Q9Y6X1, P30040, O60684, P51571, Q15027, P53618, P14625, O00629, Q9UKK6, Q9Y5L0, O60763, P50395, P61619, P31946, Q9GZP9, P62829, Q13277, Q15363, P61586, P35658

-- 72 of 1834--

GOID GO:0006996

TERM organelle organization

P-VALUE 3.37356155191204e-08  
CORRECTED P-VALUE 6.18711188620669e-05  
NUM\_ANNOTATIONS 100 (of 1334)

ANNOTATED\_GENES Q93077, O15511, O95931, P98171, Q15014, Q9HCS4, Q12959, Q96BD5, P27816, P40123, Q9P1W9, Q12981, O94953, O00628, Q9NPE3, P39019, P31749, O15145, Q93079, P12235, P68431, P99999, P62857, P05388, O00291, Q13794, P62249, P31146, O14646, Q9P0J0, Q96GM5, Q13796, O15054, Q9UBK9, P06748, P55209, P61088, Q01518, O14925, Q01082, O15144, P62913, P09429, Q16621, O14497, P35227, P07737, P62330, Q9BPX5, Q96FS4, P62081, P17096, P0C0S5, P10124, P35226, Q9Y221, Q86UE8, Q6NYC1, P50897, O95425, P10636, Q12830, P19971, P84243, P62753, P47756, Q01105, Q9NXR1, P15311, P16157, P62847, P04179, P35241, O75251, P61158, O75366, P18124, O43823, Q99698, O75164, P16104, P18077, Q12887, Q9Y5J9, P62263, P60981, Q92522, Q9Y3A2, P08708, O00257, P55769, P11277, P29375, O60763, Q9UHA3, Q9H8Y8, Q16611, O75582, Q08999, Q12824

-- 73 of 1834--

GOID GO:0006605

TERM protein targeting

P-VALUE 3.47276929695744e-08

CORRECTED P-VALUE 6.36905889061994e-05

NUM\_ANNOTATIONS 36 (of 304)

ANNOTATED\_GENES P41182, O00505, P61925, O00203, P01137, O00628, P62826, Q96P20, P31749, Q6UWC1, P25963, Q9P0J0, P43308, Q92838, O95405, O15117, O14925, Q9Y5J9, Q01082, Q9UN86, P62913, O43557, O60684, O00560, P10071, P12830, O00629, P10600, Q9UKK6, P08240, P31946, P62829, P43307, Q15629, P35658, P61586

-- 74 of 1834--

GOID GO:0065003

TERM macromolecular complex assembly

P-VALUE 3.54852239195065e-08

CORRECTED P-VALUE 6.50799006683749e-05

NUM\_ANNOTATIONS 77 (of 938)

ANNOTATED\_GENES Q93077, O15511, P50750, O00505, P35609, P62314, Q9ULR5, O60739, P61247, P63165, P32320, P46782, Q14118, P06730, O15145, O15371, Q07157, Q93079, Q30201, P68431, O00291, P43405, P07437, Q13247, P06748, P55209, O95405, Q15545, O00468, Q9H074, O15144, P09429, Q9H853, P41567, P62330, Q9BPX5, P25942, O15533, P23396, P08237, Q15459, P17096, P0C0S5, P62304, Q13243, Q13542, O75940, Q9Y221, O43516, P10636, P84243, P35269, Q15056, Q01105, P08069, Q96P20, O75563, P68363, O00303, P42768, Q14289, P55010, O75251, P61158, P68371, P13498, P60953, P68366, P16104, P56270, Q12887, P62263, O75494, Q92522, Q9NVC6, P08708, P30566

-- 75 of 1834--

GOID GO:0045893

TERM positive regulation of transcription, DNA-dependent

P-VALUE 3.63397657752749e-08

CORRECTED P-VALUE 6.66471304318542e-05

NUM\_ANNOTATIONS 47 (of 461)

ANNOTATED\_GENES P46734, Q03014, Q9HCS4, Q12830, P18848, Q12951, Q12778, P19438, P01137, Q04864, P62826, Q99967, Q13263, P48552, O75586, Q12905, Q9UHK0, Q15788, Q13772, P10914, P40425, Q96GM5, P15036, Q99607, Q06413, P55317, O00468, Q13422, P08651, P15923, Q06945, P51692, Q9NVC6, Q01196, Q02930, P17947, Q9BRP0, O14497, O15085, P42226, Q12906, P19419, P17096, O75925, P18850, O15516, P32519

-- 76 of 1834--

GOID GO:0022607

TERM cellular component assembly

P-VALUE 4.28443964815972e-08

CORRECTED P-VALUE 7.85766231472492e-05

NUM\_ANNOTATIONS 81 (of 1010)

ANNOTATED\_GENES Q93077, O15511, P50750, O00505, P35609, P62314, Q9ULR5, O60739, P61247, P63165, P32320, P46782, Q14118, P08727, P06730, O15145, O15371, Q07157, Q93079, Q30201, P68431, O00291, P43405, P07437, Q13247, P06748, P55209, O95405, Q15545, O00468, Q9H074, O15144, P09429, Q9H853, P41567, P62330, Q9BPX5, P25942, O15533, P23396, P08237, Q15459, P17096, P0C0S5, P62304, Q13243, Q13542, O75940, Q9Y221, O43516, P10636, P84243, P35269, Q15056, Q01105, P08069, Q96P20, O75563, P68363, O00303, P42768, P63146, O75251, Q14289, P55010, P61158, P68371, P13498, P60953, P68366, P16104, P56270, Q12887, P62263, O75494, Q92522, Q9NVC6, P28289, P08708, P63261, P30566

-- 77 of 1834--

GOID GO:0051254

TERM positive regulation of RNA metabolic process

P-VALUE 4.42648571779843e-08

CORRECTED P-VALUE 8.11817480644232e-05

NUM\_ANNOTATIONS 47 (of 464)

ANNOTATED\_GENES P46734, Q03014, Q9HCS4, Q12830, P18848, Q12951, Q12778, P19438, P01137, Q04864, P62826, Q99967, Q13263, P48552, O75586, Q12905, Q9UHK0, Q15788, Q13772, P10914, P40425, Q96GM5, P15036, Q99607,

Q06413, P55317, O00468, Q13422, P08651, P15923, Q06945, P51692, Q9NVC6, Q01196, Q02930, P17947, Q9BRP0, O14497, O15085, P42226, Q12906, P19419, P17096, O75925, P18850, O15516, P32519

-- 78 of 1834--

GOID GO:0045333

TERM cellular respiration

P-VALUE 4.5836790931157e-08

CORRECTED P-VALUE 8.40646745677419e-05

NUM\_ANNOTATIONS 16 (of 72)

ANNOTATED\_GENES P07919, P40925, O75390, P21912, P50213, P22695, Q12887, P31930, P28331, P14927, Q13423, O43837, P40926, P99999, Q12968, P11177

-- 79 of 1834--

GOID GO:0007243

TERM protein kinase cascade

P-VALUE 5.57848706278002e-08

CORRECTED P-VALUE 0.000102309452731386

NUM\_ANNOTATIONS 51 (of 528)

ANNOTATED\_GENES P46734, Q14344, P21580, P29692, P48551, Q15669, P19438, Q15628, O75787, P01137, Q04864, Q15208, P08069, P40763, P29466, O14781, P31749, Q8NG66, P61073, Q13162, P25963, P43405, P49137, Q9H2K8, Q02779, P61088, O15117, P26651, Q15418, P06241, Q14790, Q06187, Q9Y3E0, Q15759, Q9UN86, P51692, O15519, O43557, P28482, P14317, P10600, P25942, P04899, Q99732, P42224, O75582, Q8I WV1, P07949, P07948, O75925, P61586

-- 80 of 1834--

GOID GO:0022618

TERM ribonucleoprotein complex assembly

P-VALUE 5.69765091486518e-08

CORRECTED P-VALUE 0.000104494917778627

NUM\_ANNOTATIONS 24 (of 157)

ANNOTATED\_GENES Q13247, O75940, Q9Y221, P06748, P62314, O75494, P62263, Q9ULR5, Q9H074, O60739, P61247, P08708, Q15056, P46782, P41567, P06730, O15371, O00303, P23396, Q15459, P62304, Q13243, P55010, Q13542

-- 81 of 1834--

GOID GO:0048856

TERM anatomical structure development

P-VALUE 7.31595833892096e-08  
CORRECTED P-VALUE 0.00013417467593581  
NUM\_ANNOTATIONS 178 (of 2822)  
ANNOTATED\_GENES Q14344, P31785, Q15306, P41182, Q8IXS6, P35609, Q9HCS4, Q9UJH8, Q12959, Q04771, P50281, O00203, Q00577, Q14469, O75411, P40123, P55287, P05549, P01137, O75427, P48552, P39019, P31749, Q9Y4F9, Q08117, P61073, P53365, Q9NZG7, P25963, P16989, P13611, P43405, P07585, P12111, Q04725, Q9Y576, Q13422, P29373, Q9Y366, P15923, P29992, P10071, P17275, P35227, P30556, P62330, Q07001, P15153, O15085, P08238, P09630, P07949, P07948, Q01650, P17535, P08123, Q03014, Q6NYC1, P23771, P50897, O95425, Q96E22, P10636, Q15669, Q12778, P39059, Q16671, Q9NXR1, P15311, P33681, P16157, P08631, P19338, O14727, P01100, P04179, P42768, P63146, P10914, P40425, P35241, P60953, Q06413, Q92882, P55317, Q13207, Q9H0B8, Q9Y3A2, Q9BRP0, P63261, P28482, Q14494, P14317, Q15303, P01111, P54762, P42226, P50148, P08575, Q12968, P02452, Q12824, Q01543, P16885, Q12951, Q15628, Q9UGM1, P19404, Q14118, Q13263, P25098, Q99967, P08727, O75995, P05783, Q9H3Q1, Q02535, P02686, Q13772, P31146, P13612, P15036, Q13796, Q92838, P36955, O00468, Q01518, Q13075, P26651, Q9NPF2, Q14106, Q01196, P17947, O00560, P34820, P07737, P10600, Q96EK5, Q04726, Q01453, P10124, Q9UBI9, P14649, Q14738, P17081, Q04721, Q12830, P19971, P55327, P08069, P40763, P62324, O14781, O43847, Q9NQ50, O75366, Q13418, Q14254, Q9NP74, Q06187, O60383, Q06945, P62263, O60701, P51692, P28289, P62988, P08620, Q9NPI5, P55268, P00491, O00453, P25940, Q13277, P45379, P06576, Q16586, P61586

-- 82 of 1834--

GOID GO:0006606

TERM protein import into nucleus

P-VALUE 8.21525240291285e-08  
CORRECTED P-VALUE 0.000150667729069422  
NUM\_ANNOTATIONS 22 (of 137)  
ANNOTATED\_GENES P41182, Q92838, O00505, O95405, O15117, P61925, Q9UN86, Q01082, P01137, O60684, O43557, P10071, P12830, Q96P20, O00629, P10600, P31749, P62829, P25963, Q9P0J0, P35658, P61586

-- 83 of 1834--

GOID GO:0051649

TERM establishment of localization in cell

P-VALUE 1.05672343283025e-07  
CORRECTED P-VALUE 0.000193803077581069  
NUM\_ANNOTATIONS 102 (of 1402)

ANNOTATED\_GENES P41182, P09651, O00505, O00203, Q92624, O95486, O00161, P01137, O15392, O60896, Q96IW7, O00628, P55916, P25098, P49755, P31749, P05783, P25963, P63010, Q9H0V9, P43405, Q9P0J0, P61106, Q9ULZ3, Q9H4M9, P07437, Q13796, Q9UBK9, Q92838, P06748, O95405, O15117, O14925, O94979, P49754, Q96KC8, Q9UN86, Q01082, O43557, P62913, Q13596, P10071, O00560, Q9H853, P12830, P10600, Q96EK5, P08240, O15533, O15126, Q9HC62, P43307, Q9UHY1, Q15629, P10124, O75746, P14649, Q03014, O43516, O43747, P50897, P61925, Q01105, P62826, Q96P20, P68363, Q8IXI2, P16157, Q96P71, P55735, Q6UWC1, P27824, P42768, P43308, Q9GZY6, P35606, P68371, Q99698, P68366, P60468, P33947, Q9Y5J9, O75494, Q9Y6X1, P30040, P30273, O60684, O00148, P51571, P53618, O00629, Q9UKK6, O60763, P61619, P31946, Q9GZP9, P62829, Q16611, Q13277, P45379, P35658, P61586

-- 84 of 1834--

GOID GO:0016071

TERM mRNA metabolic process

P-VALUE 1.27185698595442e-07

CORRECTED P-VALUE 0.000233258571224041

NUM\_ANNOTATIONS 37 (of 334)

ANNOTATED\_GENES P07910, O75940, P09651, P62314, Q9UK45, Q15287, P09234, Q01081, P23246, P11940, P21127, Q92620, Q15233, O60936, Q13595, Q14493, O43791, Q15007, P52272, P31942, Q13247, P26651, O43251, P61326, O75494, Q9H074, Q15427, O00148, P47974, Q96MU7, Q15459, P17844, O60506, P51003, P62304, Q13243, P62995

-- 85 of 1834--

GOID GO:0048513

TERM organ development

P-VALUE 1.37157958059328e-07

CORRECTED P-VALUE 0.000251547695080807

NUM\_ANNOTATIONS 125 (of 1832)

ANNOTATED\_GENES Q14344, P31785, Q15306, Q01543, P41182, Q9HCS4, Q04771, P50281, O00203, Q12951, P16885, Q15628, Q14469, O75411, P05549, P01137, Q9UGM1, P19404, Q99967, P48552, P25098, O75995, P39019, P08727, P31749, Q9Y4F9, Q08117, P61073, Q9NZG7, Q02535, P25963, P16989, P13611, Q13772, P43405, P13612, P07585, P12111, Q13796, Q04725, Q9Y576, Q92838, P36955, O00468, Q13422, P29373, P26651, Q9NPF2, Q9Y366, P15923, P29992, Q14106, Q01196, P17947, P34820, P10071, P17275, P35227, P30556, P62330, P10600, Q07001, Q04726, P08238, P07949, P07948, P10124, Q9UBI9, P08123, P14649, Q03014, Q6NYC1, P50897, O95425, Q96E22, Q12830, Q04721, P19971,

P55327, Q12778, Q15669, P39059, P08069, P62324, O14781, P33681, O43847, P08631, P19338, O14727, P04179, P42768, P10914, Q14254, Q13418, P60953, Q06413, P55317, Q06187, P62263, Q06945, Q13207, P51692, Q9H0B8, P62988, P28289, P08620, Q9NPI5, Q9BRP0, P63261, P28482, P55268, P14317, P00491, Q15303, P01111, P25940, P50148, P45379, P08575, Q12968, P02452, P06576, Q16586, P61586

-- 86 of 1834--

GOID GO:0050794

TERM regulation of cellular process

P-VALUE 1.56289846373852e-07

CORRECTED P-VALUE 0.000286635578249644

NUM\_ANNOTATIONS 539 (of 10504)

ANNOTATED\_GENES P31785, O95931, P98171, Q04771, Q00577, P40123, Q92837, Q16600, O15145, Q8NG66, P61073, P78560, P53365, P51153, Q92609, Q9Y576, P50749, P48730, P29992, Q96KC8, Q15759, Q01082, O76003, P09429, O14497, Q07001, P25942, P09630, Q9HC62, P07949, P17096, P07948, Q13542, P08123, Q03014, P18848, Q12778, P18084, P46100, O75787, Q15056, P08754, Q8IXI2, O75586, P16157, Q8IW41, P26045, P04179, P11309, Q9BZZ5, P35241, P55010, P23443, P50549, P30273, Q9UBN6, P28482, O00422, P27348, P04899, Q99732, P54762, P42226, Q12968, P50750, Q96BD5, P16885, Q9NQS1, P61247, Q99967, P25098, Q12905, P99999, Q9P0J0, Q96GM5, P15036, Q13796, P62158, P36955, O00329, P54852, Q01518, P26651, Q9NPF2, O75807, O15519, P57086, Q05DA6, Q15642, P10600, P32121, P51149, Q08345, Q32M63, P84095, Q99471, Q6ZT07, P10124, Q969H8, P17081, Q04721, O43813, Q01105, P21127, P62826, Q07820, Q15326, O60486, P21796, P23508, P14316, Q13232, Q9NP74, P62263, P15498, P51692, P16284, P62988, P08620, P29375, P32245, Q08999, P51532, P32519, O96013, O15511, Q14344, P09758, O95379, Q9UNS2, O00203, P27816, Q92736, P56545, O60896, P84077, P31749, O14979, O60936, P11474, Q96G23, Q13162, P08910, P25963, Q8N1W2, P07437, Q04725, O95405, O15117, P29373, Q13422, Q6ZMJ9, O60907, Q9UN86, Q9H074, Q9BZQ8, Q9UEG4, P10071, P62330, P42331, Q01968, Q16385, Q15771, P08514, Q13636, O43670, Q13029, P25025, P50897, Q15669, Q16671, O15354, P25705, P29466, Q96P71, O00303, O14727, O75190, P28562, P17861, P62277, P10914, P40425, P11021, Q92754, Q9Y6M4, P60981, P47974, P14317, Q15303, Q9NSE2, O75489, P13693, Q68HC0, Q12824, P24863, P55212, Q01543, Q12951, P55273, P40424, P52565, P05783, O00291, Q13772, O14646, P13612, P61106, O15054, Q92838, P55209, Q8TE02, O14519, Q14106, Q9Y3E0, P31949, O95817, Q08AR7, Q16621, O00560, P12830, O43281, A2RQD6, Q86Z02, Q15438, O75019, P18850, P56211, O76061, Q9ULV1, Q14738, Q9Y2A4, O00499, P49768, Q15208, O95158, P08069, P29350, P62324, P46092, Q1ZYL3,

P09619, P43490, Q53EL6, Q01658, Q9H2K8, O43823, Q7Z5R6, O75494, P13164, P49795, P41218, O00712, O00257, Q16384, Q96KM6, O00453, Q14241, P06576, P61586, Q15555, O60602, P41182, P25024, P35609, Q9UK58, P50281, Q12959, Q9UJH8, Q9UFF9, O75411, Q14469, P32246, P23246, Q04864, P32320, O75427, P48552, O15371, Q9H707, Q12982, O94844, P43405, Q9ULZ3, P98077, O15068, Q8N149, P08651, Q14790, P15923, Q9Y366, Q14103, P17275, P41567, Q6ZS44, P30556, P61244, P15153, P23396, P08238, O75581, O14867, O14494, Q6NYC1, O95425, P33552, P35269, P63104, Q96G25, O75563, P15311, P32927, P20290, P50895, Q08722, O14798, P01100, Q15788, P63279, P62701, P61158, P55055, O75164, P60953, Q13207, P46940, O95751, Q12999, Q9BRP0, P43250, P14625, O15304, O75943, Q12906, Q9GZP9, O75925, P35658, Q13362, O60759, Q10571, Q13177, Q15014, P48551, P63165, Q13263, P61978, O75995, P06730, O60224, O60603, O94989, P49137, P31146, Q07890, Q9NP99, Q99607, O00299, P51575, Q02833, O43251, O95865, P52566, O75155, P07737, O14862, P49674, Q04726, Q9UK73, P35226, O75810, P23511, P62753, P19438, O60828, P11940, O95238, P40763, O14781, P40616, O15534, Q9GZY6, O75366, Q13418, Q99698, P55211, O43306, O75474, P06241, O60383, Q9NPI5, O00178, Q13572, P00491, O60356, Q16611, P31689, P24468, Q15306, Q8IXS6, Q14161, Q9HCS4, Q06547, Q9ULR5, P55345, P05549, Q9NRJ4, P19397, P01137, O60739, O60238, Q9P1W9, Q9H0Z9, Q16633, P46782, O94953, P39019, Q08117, O75689, P16989, P06748, P61088, Q15545, P28908, Q03989, O43557, P35227, P48736, Q12796, Q9BPX5, O15085, Q9H204, Q6IQ32, P68871, P43307, P17535, O75940, P41220, Q86UE8, P23771, P10636, Q92750, P05771, O15211, P33681, Q14289, Q02779, Q92882, Q06413, P62341, P55317, P56270, P55061, P49773, P30281, Q9NVC6, O60503, Q9Y3A2, Q14494, O95977, Q86Z22, P01111, O75582, P50148, P10586, P19419, P08575, P48960, O15516, Q14314, Q06546, P29692, Q12860, Q15628, O15392, Q12981, P04808, P45877, Q15311, Q8NEJ9, P12757, Q02535, Q9H3Q1, Q13794, P46781, Q13075, O00468, O00472, Q15418, Q01196, Q05C50, P17947, O15144, Q9C000, P50150, P38936, O14836, P61225, Q9Nzd1, Q96FS4, P42224, Q8IwV1, Q658W4, P49716, P78552, P46734, P52736, P21580, P61925, Q12830, P49238, P47756, O15327, O95976, Q96P20, Q15233, O14880, O75339, Q15084, O43847, Q9UHK0, P50570, P63302, P41240, Q9H3M7, P53999, P68371, Q9NZU5, P11717, Q06187, Q06945, Q08334, Q8WXB4, Q02930, Q15027, Q93096, P62244, P11277, P50395, P30679

-- 87 of 1834--

GOID GO:0051641

TERM cellular localization

P-VALUE 1.98269010794088e-07

CORRECTED P-VALUE 0.000363625365796358

NUM\_ANNOTATIONS 104 (of 1457)  
ANNOTATED\_GENES P41182, P09651, O00505, O00203, Q92624, O95486,  
O00161, P01137, O15392, O60896, Q96IW7, O00628, P55916, P25098, P49755,  
P31749, P05783, P25963, P63010, Q9H0V9, P43405, Q9P0J0, P61106, Q9ULZ3,  
Q9H4M9, P07437, Q13796, Q9UBK9, Q92838, P06748, O95405, O15117, O14925,  
O94979, P49754, Q96KC8, Q9UN86, Q01082, O43557, P62913, Q13596, P10071,  
O00560, Q9H853, P12830, P10600, Q96EK5, P08240, O15533, O15126, Q9HC62,  
P43307, Q9UHY1, Q15629, P10124, O75746, P14649, Q03014, O43516, O43747,  
P50897, P61925, Q9H902, Q01105, P62826, Q96P20, P68363, P15311, Q8IXI2,  
P16157, Q96P71, P55735, Q6UWC1, P27824, P42768, P43308, Q9GZY6, P35606,  
P68371, Q99698, P68366, P60468, P33947, Q9Y5J9, O75494, Q9Y6X1, P30040,  
P30273, O60684, O00148, P51571, P53618, O00629, Q9UKK6, O60763, P61619,  
P31946, Q9GZP9, P62829, Q16611, Q13277, P45379, P35658, P61586

-- 88 of 1834--

GOID GO:0030029

TERM actin filament-based process

P-VALUE 2.09529306944584e-07

CORRECTED P-VALUE 0.000384276748936368

NUM\_ANNOTATIONS 40 (of 384)

ANNOTATED\_GENES O15511, P14649, P41182, Q8IXS6, O43516, Q12959,  
Q9BT40, O95425, P47756, P15311, P08727, O15145, P53365, P42768, P31146,  
P35241, P61158, Q13796, O75366, P13796, P60953, Q01518, O95466, P60981,  
Q01082, P28289, O15144, P63261, O00560, P52566, P11277, P07737, Q15642,  
P62330, Q9BPX5, O15085, P15153, P01111, P45379, P61586

-- 89 of 1834--

GOID GO:0046637

TERM regulation of alpha-beta T cell differentiation

P-VALUE 3.13685810990608e-07

CORRECTED P-VALUE 0.000575299777356775

NUM\_ANNOTATIONS 8 (of 18)

ANNOTATED\_GENES P31785, Q15306, P41182, P33681, O75995, P00491,  
O00203, P43405

-- 90 of 1834--

GOID GO:0045934

TERM negative regulation of nucleobase, nucleoside, nucleotide and nucleic acid  
metabolic process

P-VALUE 3.17690207536155e-07

CORRECTED P-VALUE 0.000582643840621308  
NUM\_ANNOTATIONS 49 (of 527)  
ANNOTATED\_GENES P41182, Q06546, Q03014, Q9HCS4, Q12830, P61925, Q96BD5, Q00577, Q14469, P01137, P63165, P32320, P40763, O75427, Q99967, Q15326, P48552, Q02535, P16989, P14316, P63279, Q53EL6, Q01658, O75190, P62277, Q9P0J0, O15534, P55055, O15054, Q06413, Q9NZU5, Q13422, P08651, Q03989, O43251, O75494, P62263, P31949, Q13207, P09429, P17947, Q9BRP0, P10071, P35227, P27348, O75943, P23396, Q12906, P17096

-- 91 of 1834--

GOID GO:0006119

TERM oxidative phosphorylation

P-VALUE 3.49382890826483e-07

CORRECTED P-VALUE 0.000640768221775769

NUM\_ANNOTATIONS 25 (of 185)

ANNOTATED\_GENES P07919, P05496, O15239, P22695, Q12887, P31930, O00483, P21281, O75306, P28331, O95169, P25705, Q06055, O75964, P14927, P19404, P27449, O43676, P48201, O75489, O43674, P51970, P18859, P06576, O75251

-- 92 of 1834--

GOID GO:0017038

TERM protein import

P-VALUE 3.65068364051036e-07

CORRECTED P-VALUE 0.000669535379669599

NUM\_ANNOTATIONS 24 (of 173)

ANNOTATED\_GENES P41182, Q92838, O00505, O95405, O15117, P61925, Q9Y5J9, Q9UN86, Q01082, P01137, O60684, O43557, P10071, O00628, P12830, Q96P20, O00629, P10600, P31749, P62829, P25963, Q9P0J0, P35658, P61586

-- 93 of 1834--

GOID GO:0030036

TERM actin cytoskeleton organization

P-VALUE 3.68732050443342e-07

CORRECTED P-VALUE 0.000676254580513089

NUM\_ANNOTATIONS 38 (of 363)

ANNOTATED\_GENES O15511, P41182, Q8IXS6, O43516, Q12959, Q9BT40, O95425, P47756, P15311, P08727, O15145, P53365, P42768, P31146, P35241, P61158, Q13796, O75366, P13796, P60953, Q01518, O95466, P60981, Q01082,

P28289, O15144, P63261, O00560, P52566, P11277, P07737, Q15642, P62330, Q9BPX5, O15085, P15153, P01111, P61586

-- 94 of 1834--

GOID GO:0006397

TERM mRNA processing

P-VALUE 4.04667276081806e-07

CORRECTED P-VALUE 0.000742159784334033

NUM\_ANNOTATIONS 32 (of 279)

ANNOTATED\_GENES P07910, O75940, P09651, P62314, Q9UK45, P09234, Q01081, P23246, P11940, P21127, Q92620, Q15233, O60936, Q13595, Q14493, O43791, Q15007, P52272, P31942, Q13247, O43251, O75494, Q15427, O00148, Q96MU7, Q15459, P17844, O60506, P51003, Q13243, P62304, P62995

-- 95 of 1834--

GOID GO:0010608

TERM posttranscriptional regulation of gene expression

P-VALUE 4.29463175792094e-07

CORRECTED P-VALUE 0.0007876354644027

NUM\_ANNOTATIONS 25 (of 187)

ANNOTATED\_GENES P62341, P26651, Q06945, Q9ULR5, Q96KC8, Q9H074, O60739, O75807, Q9BZQ8, Q9H0Z9, Q15056, P11940, P46782, P47974, P41567, P06730, P31749, Q8NEJ9, O15371, O00303, Q9P0J0, P55010, P98179, Q13542, P62701

-- 96 of 1834--

GOID GO:0006886

TERM intracellular protein transport

P-VALUE 4.53370784952294e-07

CORRECTED P-VALUE 0.000831482019602507

NUM\_ANNOTATIONS 58 (of 678)

ANNOTATED\_GENES P41182, O00505, O43747, P61925, O00203, Q92624, O95486, P01137, O60896, O00628, P62826, Q96P20, P31749, P05783, P55735, Q6UWC1, P25963, P63010, Q9P0J0, P43308, P35606, Q92838, P06748, P60468, O95405, O15117, O14925, P33947, Q9Y5J9, P49754, Q9UN86, Q01082, Q9Y6X1, P30040, O60684, O43557, P62913, Q13596, P10071, O00560, P51571, P12830, P53618, P10600, O00629, Q9UKK6, P08240, O60763, P61619, P31946, Q9GZP9, P62829, Q13277, Q9HC62, P43307, Q15629, P61586, P35658

-- 97 of 1834--

GOID GO:0042127 & cell proliferation

TERM regulation of cell proliferation

P-VALUE 4.88649449929783e-07

CORRECTED P-VALUE 0.000896183091171221

NUM\_ANNOTATIONS 59 (of 696)

ANNOTATED\_GENES P41182, P35226, P25025, Q969H8, O14494, Q04721, Q9UFF9, P55273, Q00577, Q14469, P01137, P56545, P25705, P08069, O75563, P62324, O14781, O75995, P09619, P43490, Q08722, P04179, P31146, P43405, P41240, Q14289, P62701, P46781, Q13418, P06748, P55209, P28908, P54852, Q06945, P13164, Q14106, Q13207, P31949, P51692, P08620, O95751, Q9BRP0, P10071, Q12999, P62244, P38936, P14317, P10600, P00491, O00453, P04899, P15153, P84095, P01111, Q9GZP9, P08575, P43307, P07948, Q12824

-- 98 of 1834--

GOID GO:0046649

TERM lymphocyte activation

P-VALUE 5.11006593747043e-07

CORRECTED P-VALUE 0.000937186092932077

NUM\_ANNOTATIONS 34 (of 310)

ANNOTATED\_GENES P31785, Q15306, P41182, Q6NYC1, O00203, Q15669, P16885, P55327, P01137, P39656, O75563, P33681, O75995, P61073, Q08722, P42768, P31146, P43405, P10914, P13612, Q9GZY6, Q99607, O00329, P15923, Q06945, P51692, O43557, P38936, P00491, P25942, O00453, P42226, P08575, Q8I WV1

-- 99 of 1834--

GOID GO:0022904

TERM respiratory electron transport chain

P-VALUE 5.20252835475506e-07

CORRECTED P-VALUE 0.000954143700262077

NUM\_ANNOTATIONS 16 (of 85)

ANNOTATED\_GENES P07919, O75746, O43676, O15239, Q12887, O00483, O75489, O43674, P51970, P04179, O75306, P28331, O75251, O95169, P14927, P19404

-- 100 of 1834--

GOID GO:0008154

TERM actin polymerization or depolymerization

P-VALUE 5.7503124667156e-07

CORRECTED P-VALUE 0.00105460730639564

NUM\_ANNOTATIONS 17 (of 96)  
ANNOTATED\_GENES O15511, O75366, Q13796, P61158, O43516, O95425,  
Q01082, P60981, O15144, P47756, P11277, P62330, Q9BPX5, O15145, P31146,  
P42768, P35241

-- 101 of 1834--

GOID GO:0007015  
TERM actin filament organization  
P-VALUE 5.92933151139941e-07  
CORRECTED P-VALUE 0.00108743939919065  
NUM\_ANNOTATIONS 22 (of 153)  
ANNOTATED\_GENES O15511, P13796, O75366, Q13796, P61158, Q8IXS6,  
O43516, Q12959, O95425, Q01082, P60981, O15144, P47756, P11277, P62330,  
Q9BPX5, P15311, O15145, P42768, P31146, P35241, P61586

-- 102 of 1834--

GOID GO:0009060  
TERM aerobic respiration  
P-VALUE 6.02898760908123e-07  
CORRECTED P-VALUE 0.0011057163275055  
NUM\_ANNOTATIONS 13 (of 57)  
ANNOTATED\_GENES Q13423, P07919, P40925, O43837, O75390, P21912,  
P50213, P40926, P22695, Q12887, P31930, P11177, P14927

-- 103 of 1834--

GOID GO:0052548  
TERM regulation of endopeptidase activity  
P-VALUE 6.14076667513126e-07  
CORRECTED P-VALUE 0.00112621660821907  
NUM\_ANNOTATIONS 16 (of 86)  
ANNOTATED\_GENES P55211, P55273, O15392, Q9C000, Q96P20, O43847,  
P23396, Q16611, O14727, P99999, P42224, O00291, Q13794, O75190, P11021,  
Q9ULZ3

-- 104 of 1834--

GOID GO:0042775  
TERM mitochondrial ATP synthesis coupled electron transport  
P-VALUE 7.04209924574022e-07  
CORRECTED P-VALUE 0.00129152100166876  
NUM\_ANNOTATIONS 14 (of 67)

ANNOTATED\_GENES P07919, O43676, O15239, Q12887, O00483, O75489,  
O43674, P51970, O75306, P28331, O75251, O95169, P14927, P19404

-- 105 of 1834--

GOID GO:0050789

TERM regulation of biological process

P-VALUE 9.7296945522562e-07

CORRECTED P-VALUE 0.00178442598088379

NUM\_ANNOTATIONS 547 (of 10828)

ANNOTATED\_GENES P31785, O95931, P98171, Q04771, Q00577, P40123,  
Q92837, Q16600, O15145, Q8NG66, P61073, P78560, P53365, P51153, Q92609,  
Q9Y576, P50749, P48730, P29992, Q96KC8, Q15759, Q01082, O76003, P09429,  
O14497, Q07001, P25942, P09630, Q9HC62, P07949, P17096, P07948, Q13542,  
P08123, Q03014, P18848, Q12778, P18084, P46100, O75787, Q15056, P08754,  
Q8IXI2, O75586, P16157, Q8IW41, P26045, P04179, P63146, P11309, Q9BZZ5,  
P35241, P55010, P23443, P50549, O75882, P30273, Q9UBN6, P28482, O00422,  
P27348, P04899, Q99732, P54762, P42226, Q12968, P50750, Q96BD5, P16885,  
Q9NQS1, P61247, Q99967, P25098, Q12905, P99999, Q9P0J0, Q96GM5, P15036,  
Q13796, P62158, P36955, O00329, P54852, Q01518, P26651, Q9NPF2, O75807,  
O15519, P57086, Q05DA6, Q15642, P10600, P32121, P51149, Q08345, Q32M63,  
P84095, Q99471, Q6ZT07, P10124, Q969H8, P17081, Q04721, O43813, Q01105,  
P21127, P62826, Q07820, Q15326, O60486, P21796, P23508, P14316, Q13232,  
Q9NP74, P62263, P15498, P51692, P16284, P62988, P08620, P29375, P32245,  
Q08999, P51532, P32519, O96013, O15511, Q14344, P09758, O95379, Q9UNS2,  
O00203, P27816, Q92736, P56545, O60896, P84077, P31749, O14979, O60936,  
P11474, Q96G23, Q13162, P08910, P25963, Q8N1W2, P07437, Q04725, O95405,  
O15117, P29373, Q13422, Q6ZMJ9, O60907, Q9UN86, Q9H074, Q9BZQ8,  
Q9UEG4, P10071, P62330, P42331, Q01968, Q16385, Q15771, P08514, Q13636,  
O43670, Q13029, P25025, P50897, Q15669, Q16671, O15354, P25705, P29466,  
Q96P71, O00303, O14727, O75190, P28562, P17861, P62277, P10914, P40425,  
P11021, Q92754, Q9Y6M4, P60981, P47974, P14317, Q15303, Q9NSE2, O75489,  
P13693, Q68HC0, Q12824, P24863, P55212, Q01543, Q12951, P55273, P40424,  
P52565, P05783, O00291, Q13772, O14646, P13612, P61106, O15054, Q92838,  
P55209, Q8TE02, O14519, Q14106, Q9Y3E0, P31949, O95817, Q08AR7, Q16621,  
O00560, P12830, O43281, A2RQD6, Q86Z02, Q15438, O75019, P18850, P56211,  
O76061, Q9ULV1, Q14738, Q9Y2A4, O00499, P49768, Q15208, O95158, P08069,  
P29350, P62324, P46092, Q1ZYL3, P09619, P43490, Q53EL6, Q01658, Q9H2K8,  
O43823, Q7Z5R6, O75494, P13164, P49795, P41218, O00712, O00257, Q16384,  
Q96KM6, O00453, Q14241, P06576, P61586, Q15555, O60602, P41182, P25024,  
P35609, Q9UK58, P50281, Q12959, Q9UJH8, Q9UFF9, O75411, Q14469, P32246,

P23246, P62253, Q04864, P32320, O75427, P48552, O15371, Q9H707, Q12982, O94844, P43405, Q9ULZ3, P98077, O15068, Q8N149, P61077, P08651, Q14790, P15923, Q9Y366, Q14103, P17275, P41567, Q6ZS44, P30556, P61244, P15153, P23396, P08238, O75581, O14867, O14494, Q6NYC1, O95425, P33552, P35269, P63104, Q96G25, O75563, P15311, P32927, P20290, P50895, Q08722, O14798, P01100, Q15788, P63279, P62701, P61158, P55055, O75164, P60953, Q13207, P46940, O95751, Q12999, Q9BRP0, P43250, P14625, O15304, O75943, Q12906, Q9GZP9, O75925, P35658, Q13362, O60759, Q10571, Q13177, Q15014, P48551, P63165, Q13263, P61978, O75995, P06730, O60224, O60603, O94989, P49137, P31146, Q07890, Q9NP99, Q99607, O00299, P51575, Q02833, O43251, O95865, P52566, O75155, P07737, O14862, P49674, Q04726, P62837, Q9UK73, P35226, O75810, P23511, P62753, P19438, O60828, P11940, O95238, P40763, O14781, P40616, O15534, Q9GZY6, O75366, Q13418, Q99698, P55211, O43306, O75474, P06241, O60383, Q9NPI5, O00178, Q13572, P00491, O60356, Q16611, P45379, P31689, P24468, Q15306, Q8IXS6, Q14161, Q9HCS4, Q06547, Q9ULR5, P55345, P05549, Q9NRJ4, P19397, P01137, O60739, O60238, Q9P1W9, Q9H0Z9, Q16633, P46782, O94953, P39019, Q08117, O75689, P16989, P06748, P61088, Q15545, P28908, Q03989, O43557, P35227, P48736, Q12796, Q9BPX5, O15085, Q9H204, Q6IQ32, P68871, P43307, P17535, O75940, P41220, Q86UE8, P23771, P10636, Q92750, P05771, O15211, P33681, Q14289, Q02779, Q92882, Q06413, P62341, P55317, P49459, P56270, P55061, P49773, P30281, Q9NVC6, O60503, Q9Y3A2, Q14494, Q86Z22, O95977, P01111, O75582, P50148, P10586, P19419, P08575, P48960, O15516, Q14314, Q06546, P29692, Q12860, Q15628, O15392, Q12981, P04808, P45877, Q15311, Q8NEJ9, P12757, Q02535, Q9H3Q1, Q13794, P98179, P46781, Q13075, O00468, O00472, Q15418, Q01196, Q05C50, P17947, O15144, Q9C000, P50150, P38936, O14836, P61225, Q9Nzd1, Q96FS4, P42224, Q8IwV1, Q658W4, P49716, P78552, P46734, P52736, P21580, P61925, Q12830, P49238, P47756, O15327, O95976, Q96P20, Q15233, O14880, O75339, Q15084, O43847, Q9UHK0, P50570, P63302, P41240, Q9H3M7, P53999, P68371, Q9NZU5, P11717, Q06187, Q06945, Q08334, Q8WXB4, Q02930, Q15027, Q93096, P62244, P11277, P50395, P30679

-- 106 of 1834--

GOID GO:0065007

TERM biological regulation

P-VALUE 1.03879513584924e-06

CORRECTED P-VALUE 0.00190515027914751

NUM\_ANNOTATIONS 573 (of 11416)

ANNOTATED\_GENES P31785, O95931, P98171, Q04771, Q00577, P40123, Q92837, Q16600, O15145, Q8NG66, P61073, P78560, P53365, P51153, Q92609,

Q9Y576, P50749, P48730, P29992, Q96KC8, Q15759, Q01082, O76003, P09429, O14497, Q07001, P25942, P09630, Q9HC62, P07949, P17096, P07948, Q13542, P08123, Q03014, P18848, Q12778, P18084, P46100, O75787, Q15056, P08754, Q8IXI2, O75586, P16157, Q8IW41, P26045, P04179, P63146, P11309, Q9BZZ5, P35241, P55010, P23443, P50549, O75882, P30273, Q9UBN6, P28482, O00422, P17174, P27348, P04899, Q99732, P54762, P42226, Q12968, P50750, Q96BD5, P16885, Q9NQS1, P61247, Q99967, P25098, Q12905, P99999, Q9P0J0, Q96GM5, P15036, Q13796, P62158, P36955, O00329, P54852, Q01518, P26651, Q9NPF2, O75807, O15519, P57086, Q05DA6, Q15642, P10600, P32121, P51149, Q08345, Q32M63, P84095, Q99471, Q6ZT07, P10124, O43315, Q969H8, P17081, Q04721, O43813, Q01105, P21127, P62826, Q07820, Q15326, O60486, P21796, P23508, Q8NBQ5, P14316, Q13232, Q9NP74, P62263, P15498, P51692, P16284, P62988, P08620, P38435, P29375, P32245, Q08999, P51532, P32519, O96013, O15511, Q14344, P09758, O95379, Q9UNS2, O00203, P27816, Q92736, P56545, O60896, P84077, P08195, P31749, O14979, O60936, P11474, Q96G23, Q13162, P08910, P25963, Q8N1W2, P07437, Q04725, O95405, O15117, P29373, Q13422, Q6ZMJ9, O60907, Q9UN86, Q9H074, Q9BZQ8, Q9UEG4, P10071, P62330, P42331, Q01968, P17844, Q16385, Q15771, P08514, Q13636, O43670, Q13029, P25025, P50897, Q15669, P06737, Q16671, O15354, P25705, P29466, Q96P71, O00303, O14727, O75190, P28562, P17861, P62277, P10914, P40425, P11021, Q92754, Q9Y6M4, P60981, P47974, P14317, Q15303, Q9NSE2, O43838, O75489, P13693, Q68HC0, Q12824, P24863, P55212, Q01543, Q12951, P55273, P40424, P52565, P28331, P05783, O00291, Q13772, O14646, P13612, P61106, Q9Y691, O15054, Q92838, P55209, Q8TE02, O14519, P01009, Q14106, Q9Y3E0, P31949, O95817, Q08AR7, Q16621, O00560, P12830, O43281, A2RQD6, Q86Z02, Q15438, O75019, P18850, P56211, Q01453, O76061, Q9ULV1, Q9Y2A4, Q14738, O00499, P49768, Q15208, O95158, P08069, P29350, P62324, P46092, Q1ZYL3, P09619, P43490, Q53EL6, Q01658, Q9H2K8, O43823, P31358, P33947, Q7Z5R6, O75494, P13164, P49795, P41218, O00712, O00257, Q16384, Q96KM6, O00453, Q14241, P06576, P61586, Q15555, O60602, P41182, P25024, Q9UK58, P35609, Q9UJH8, P50281, Q12959, Q9UFF9, O75411, Q14469, P32246, P23246, P62253, Q04864, P32320, O75427, P48552, Q9H707, O15371, Q12982, O94844, P43405, Q9ULZ3, P98077, O15068, Q8N149, P61077, P08651, Q9Y366, Q14790, P15923, Q14103, P17275, P41567, Q6ZS44, P30556, P61244, P15153, P23396, P08238, O75581, O14867, O14494, Q6NYC1, Q92506, O95425, P33552, P35269, P63104, Q96G25, O75563, P15311, P32927, O95461, P20290, P50895, Q08722, O14798, P01100, Q15788, P63279, P42768, P62701, P61158, P55055, O75164, P60953, Q13207, P46940, O95751, P08708, Q12999, Q9BRP0, P43250, P14625, O15304, O75943, Q9GZP9, Q12906, Q7L1T6, O75925, P35658, Q13362, O60759, Q10571, Q13177, Q15014, P48551, P63165, Q13263, P61978, O75995, P06730, O60224, O60603, O94989, P12235,

Q30201, Q9NP99, P49137, P31146, Q07890, Q99607, O00299, P51575, Q02833, O43251, O95865, P52566, O75155, P07737, O14862, P49674, Q04726, P08237, P62837, Q9UK73, P35226, O75810, P23511, P62753, P19438, O60828, P11940, O95238, P40763, O14781, P40616, Q13310, P62847, O15534, Q9GZY6, O75366, Q13418, Q99698, P55211, O43306, O75474, P06241, O60383, Q9NPI5, O00178, Q13572, P00491, O60356, Q16611, P45379, P31689, P24468, Q15306, Q8IXS6, Q14161, Q9HCS4, Q06547, Q9ULR5, P55345, P05549, Q9NRJ4, P19397, P01137, O60739, O60238, Q9P1W9, Q9H0Z9, Q16633, P46782, O94953, P39019, Q08117, O75689, P16989, P06748, P61088, Q15545, P28908, Q03989, O43557, P35227, P48736, Q12796, Q9BPX5, O15085, Q9H204, Q6IQ32, P68871, P43307, P17535, O75940, P41220, Q86UE8, P23771, P10636, Q92750, P05771, O15211, P33681, Q14289, Q02779, Q92882, Q06413, P62341, P55317, P49459, P56270, P55061, P49773, P30281, Q9NVC6, O60503, Q9Y3A2, Q14494, Q86Z22, O95977, P01111, O75582, P50148, P10586, P19419, P08575, P48960, O15516, Q14314, Q06546, P29692, Q12860, Q15628, O15392, Q12981, P04808, P45877, Q15311, Q8NEJ9, P12757, Q02535, Q9H3Q1, Q13794, P02686, P98179, P46781, Q13075, O00468, O00472, Q15418, Q01196, Q05C50, P17947, O15144, Q9C000, P50150, P38936, O14836, P61225, Q9Nzd1, Q96FS4, P42224, Q8IWV1, Q658W4, P49716, P46597, P78552, P46734, P52736, P21580, P61925, Q12830, P49238, P47756, O15327, O95976, Q96P20, Q15233, O14880, O75339, Q15084, O43847, Q9UHK0, P50570, P63302, P41240, Q9H3M7, P53999, P68371, Q9NZU5, P11717, Q06187, Q8WXB4, Q06945, Q08334, Q02930, Q15027, Q93096, P62244, P11277, P50395, P30679

-- 107 of 1834--

GOID GO:0008064

TERM &regulation of actin polymerization or depolymerization

P-VALUE 1.04430321937355e-06

CORRECTED P-VALUE 0.00191525210433109

NUM\_ANNOTATIONS 15 (of 79)

ANNOTATED\_GENES O15511, O75366, Q13796, P62330, P61158, Q9BPX5, O15145, O95425, Q01082, P60981, O15144, P47756, P31146, P35241, P11277

-- 108 of 1834--

GOID GO:0052547

TERM regulation of peptidase activity

P-VALUE 1.1619114088612e-06

CORRECTED P-VALUE 0.00213094552385144

NUM\_ANNOTATIONS 16 (of 90)

ANNOTATED\_GENES P55211, P55273, O15392, Q9C000, Q96P20, O43847, P23396, Q16611, O14727, P99999, P42224, O00291, Q13794, O75190, P11021, Q9ULZ3

-- 109 of 1834--

GOID GO:0042773

TERM ATP synthesis coupled electron transport

P-VALUE 1.23430777797772e-06

CORRECTED P-VALUE 0.00226372046481114

NUM\_ANNOTATIONS 14 (of 70)

ANNOTATED\_GENES P07919, O43676, O15239, Q12887, O00483, O75489, O43674, P51970, O75306, P28331, O75251, O95169, P14927, P19404

-- 110 of 1834--

GOID GO:0016192

TERM vesicle-mediated transport

P-VALUE 1.42311672293533e-06

CORRECTED P-VALUE 0.00260999606986339

NUM\_ANNOTATIONS 62 (of 770)

ANNOTATED\_GENES O75131, Q6NYC1, Q7L8C5, O43747, O00499, P50897, O00203, O95486, Q92673, O00161, P01137, Q96T51, Q12981, O60896, Q96IW7, Q9P0N8, P84077, P61163, P49755, P16157, P50570, P05783, Q30201, P51153, P63010, Q9H0V9, O00291, P42768, P31146, P43405, P61106, Q9GZY6, Q9H4M9, P35606, Q99698, O95405, Q01518, P11717, P33947, Q13439, O94979, P63027, P49754, P15498, Q9Y3E0, P30273, Q13596, P53618, Q15642, P62330, O60763, P32121, P51149, O15533, P01111, O15126, Q13277, O75581, Q15438, Q15363, Q9UHY1, Q9P0V3

-- 111 of 1834--

GOID GO:0045321

TERM leukocyte activation

P-VALUE 1.56540914963455e-06

CORRECTED P-VALUE 0.00287096038042977

NUM\_ANNOTATIONS 36 (of 355)

ANNOTATED\_GENES P31785, Q15306, P41182, P25025, Q6NYC1, O00203, Q15669, P16885, P55327, P01137, P39656, O75563, P33681, O75995, P61073, Q08722, P42768, P31146, P43405, P10914, P13612, Q9GZY6, Q99607, O00329, P15923, Q06945, P51692, P30273, O43557, P38936, P00491, P25942, O00453, P42226, P08575, Q8I WV1

-- 112 of 1834--

GOID GO:0042306

TERM regulation of protein import into nucleus

P-VALUE 1.73367830009057e-06

CORRECTED P-VALUE 0.0031795660023661

NUM\_ANNOTATIONS 10 (of 36)

ANNOTATED\_GENES Q96P20, Q92838, P61925, Q9UN86, P25963, P01137, O43557, P10071, P12830, P61586

-- 113 of 1834--

GOID GO:0030097

TERM hemopoiesis

P-VALUE 1.93011881125007e-06

CORRECTED P-VALUE 0.00353983789983263

NUM\_ANNOTATIONS 33 (of 314)

ANNOTATED\_GENES P31785, Q15306, P41182, Q6NYC1, O00203, Q04721, Q15669, P16885, P55327, O75411, P01137, P33681, O75995, P39019, P25963, P04179, P43405, P10914, P13612, P60953, Q13422, P26651, P15923, Q06945, P62263, Q14106, P51692, Q01196, P17947, P14317, P00491, P08575, P07948

-- 114 of 1834--

GOID GO:0010629

TERM -negative regulation of gene expression

P-VALUE 1.93860281866453e-06

CORRECTED P-VALUE 0.00355539756943074

NUM\_ANNOTATIONS 45 (of 497)

ANNOTATED\_GENES P41182, Q06546, Q03014, Q9HCS4, Q12830, P61925, Q96BD5, Q00577, Q14469, P01137, O60238, P63165, P40763, O75427, Q99967, Q15326, P48552, Q02535, P16989, P14316, P63279, Q53EL6, Q01658, O75190, Q9P0J0, O15534, P98179, P55055, O15054, Q06413, Q9NZU5, Q13422, P08651, Q03989, O43251, P62263, Q13207, P09429, P17947, Q9BRP0, P10071, P35227, P27348, Q12906, P17096

-- 115 of 1834--

GOID GO:0010629 - gene expression

TERM negative regulation of gene expression

P-VALUE 1.93860281866453e-06

CORRECTED P-VALUE 0.00355539756943074

NUM\_ANNOTATIONS 45 (of 497)

ANNOTATED\_GENES P41182, Q06546, Q03014, Q9HCS4, Q12830, P61925, Q96BD5, Q00577, Q14469, P01137, O60238, P63165, P40763, O75427, Q99967, Q15326, P48552, Q02535, P16989, P14316, P63279, Q53EL6, Q01658, O75190, Q9P0J0, O15534, P98179, P55055, O15054, Q06413, Q9NZU5, Q13422, P08651, Q03989, O43251, P62263, Q13207, P09429, P17947, Q9BRP0, P10071, P35227, P27348, Q12906, P17096

-- 116 of 1834--

GOID GO:0043281

TERM regulation of caspase activity

P-VALUE 2.00900239908313e-06

CORRECTED P-VALUE 0.00368451039991845

NUM\_ANNOTATIONS 15 (of 83)

ANNOTATED\_GENES Q96P20, P55211, P23396, P55273, Q16611, P42224, O14727, P99999, O15392, Q13794, O00291, Q9C000, O75190, P11021, Q9ULZ3

-- 117 of 1834--

GOID GO:0006120

TERM mitochondrial electron transport, NADH to ubiquinone

P-VALUE 2.12080577690357e-06

CORRECTED P-VALUE 0.00388955779484114

NUM\_ANNOTATIONS 11 (of 45)

ANNOTATED\_GENES O43676, O15239, O00483, O75489, O43674, P51970, O75306, P28331, O95169, O75251, P19404

-- 118 of 1834--

GOID GO:0010558

TERM -negative regulation of macromolecule biosynthetic process

P-VALUE 2.38023267993811e-06

CORRECTED P-VALUE 0.00436534673500649

NUM\_ANNOTATIONS 48 (of 549)

ANNOTATED\_GENES P41182, Q06546, Q03014, Q9HCS4, Q12830, P61925, Q96BD5, Q9ULR5, Q00577, Q14469, P01137, P63165, P40763, O75427, Q99967, Q15326, P48552, Q02535, P16989, P14316, P63279, Q53EL6, Q01658, O75190, Q9P0J0, O15534, P55055, O15054, Q9Y576, Q06413, Q9NZU5, Q13422, P08651, Q03989, O43251, P62263, P31949, Q13207, P09429, P17947, Q9BRP0, P10071, P35227, P27348, O75943, Q12906, P17096, Q13542

-- 119 of 1834--

GOID GO:0010558 - macromolecule biosynthetic process

TERM negative regulation of macromolecule biosynthetic process

P-VALUE 2.38023267993811e-06

CORRECTED P-VALUE 0.00436534673500649

NUM\_ANNOTATIONS 48 (of 549)

ANNOTATED\_GENES P41182, Q06546, Q03014, Q9HCS4, Q12830, P61925, Q96BD5, Q9ULR5, Q00577, Q14469, P01137, P63165, P40763, O75427, Q99967, Q15326, P48552, Q02535, P16989, P14316, P63279, Q53EL6, Q01658, O75190, Q9P0J0, O15534, P55055, O15054, Q9Y576, Q06413, Q9NZU5, Q13422, P08651, Q03989, O43251, P62263, P31949, Q13207, P09429, P17947, Q9BRP0, P10071, P35227, P27348, O75943, Q12906, P17096, Q13542

-- 120 of 1834--

GOID GO:0008632

TERM apoptotic program

P-VALUE 2.58883672778172e-06

CORRECTED P-VALUE 0.00474792655875167

NUM\_ANNOTATIONS 18 (of 118)

ANNOTATED\_GENES Q6NYC1, P55211, P50897, Q9C000, Q9P1W9, Q07820, P31749, P21796, P23396, Q16611, O14727, P99999, P42224, O00291, Q13794, P04179, Q9P0J0, Q9ULZ3

-- 121 of 1834--

GOID GO:0006417

TERM regulation of translation

P-VALUE 2.65736216964732e-06

CORRECTED P-VALUE 0.00487360221913319

NUM\_ANNOTATIONS 19 (of 130)

ANNOTATED\_GENES P62341, Q9ULR5, Q96KC8, Q9H074, O60739, O75807, Q9BZQ8, Q15056, P46782, P41567, P06730, P31749, O15371, Q8NEJ9, O00303, Q9P0J0, P55010, Q13542, P62701

-- 122 of 1834--

GOID GO:0016481

TERM negative regulation of transcription

P-VALUE 3.44092905162551e-06

CORRECTED P-VALUE 0.00631066388068118

NUM\_ANNOTATIONS 43 (of 476)

ANNOTATED\_GENES P41182, Q06546, Q03014, Q9HCS4, Q12830, P61925, Q96BD5, Q00577, Q14469, P01137, P63165, P40763, O75427, Q99967, Q15326, P48552, Q02535, P16989, P14316, P63279, Q53EL6, Q01658, O75190, Q9P0J0,

O15534, P55055, O15054, Q06413, Q9NZU5, Q13422, P08651, Q03989, O43251, P62263, Q13207, P09429, P17947, P10071, Q9BRP0, P35227, P27348, Q12906, P17096

-- 123 of 1834--

GOID GO:0008064 & actin polymerization or depolymerization

TERM regulation of actin polymerization or depolymerization

P-VALUE 3.45890406500955e-06

CORRECTED P-VALUE 0.00634363005522751

NUM\_ANNOTATIONS 14 (of 76)

ANNOTATED\_GENES O15511, O75366, Q13796, P62330, P61158, Q9BPX5, O15145, O95425, Q01082, P60981, O15144, P47756, P35241, P11277

-- 124 of 1834--

GOID GO:0050871

TERM positive regulation of B cell activation

P-VALUE 3.83178584476088e-06

CORRECTED P-VALUE 0.00702749523929145

NUM\_ANNOTATIONS 9 (of 31)

ANNOTATED\_GENES P51692, P31785, P42226, P41182, O75995, P01137, P08575, P43405, P38936

-- 125 of 1834--

GOID GO:0046634

TERM regulation of alpha-beta T cell activation

P-VALUE 4.19471148417239e-06

CORRECTED P-VALUE 0.00769310086197217

NUM\_ANNOTATIONS 8 (of 24)

ANNOTATED\_GENES P31785, Q15306, P41182, P33681, O75995, P00491, O00203, P43405

-- 126 of 1834--

GOID GO:0051129

TERM negative regulation of cellular component organization

P-VALUE 4.21101417188055e-06

CORRECTED P-VALUE 0.00772299999122893

NUM\_ANNOTATIONS 18 (of 122)

ANNOTATED\_GENES O75366, Q13796, P60953, O95425, P10636, Q9ULR5, P27816, Q01082, P01137, P09429, P47756, Q01105, P11277, P62330, P17096, P31146, P35241, Q13542

-- 127 of 1834--

GOID GO:0034622

TERM cellular macromolecular complex assembly

P-VALUE 4.43185159782348e-06

CORRECTED P-VALUE 0.00812801583040827

NUM\_ANNOTATIONS 58 (of 729)

ANNOTATED\_GENES Q93077, O15511, P50750, O75940, Q9Y221, P62314, P10636, Q9ULR5, P84243, P35269, O60739, P61247, Q15056, Q01105, P46782, P68363, P06730, O15145, O15371, O00303, Q93079, P68431, P42768, O75251, P55010, Q14289, P07437, P68371, Q13247, P61158, P13498, P06748, P68366, P55209, Q15545, O95405, P16104, P56270, O00468, Q12887, O75494, P62263, Q92522, Q9NVC6, Q9H074, O15144, P09429, P08708, Q9H853, P41567, P62330, Q9BPX5, P23396, Q15459, P0C0S5, P62304, Q13243, Q13542

-- 128 of 1834--

GOID GO:0051253

TERM negative regulation of RNA metabolic process

P-VALUE 4.57791970592198e-06

CORRECTED P-VALUE 0.00839590474066091

NUM\_ANNOTATIONS 36 (of 372)

ANNOTATED\_GENES P41182, Q06546, Q03014, Q9HCS4, Q12830, P61925, Q96BD5, Q00577, Q14469, P40763, Q99967, Q15326, P48552, Q02535, P14316, P16989, P63279, Q01658, O75190, P62277, Q9P0J0, O15054, Q06413, Q9NZU5, Q03989, P08651, P62263, O75494, Q13207, P09429, P17947, Q9BRP0, P35227, P27348, Q12906, P17096

-- 129 of 1834--

GOID GO:0022411

TERM cellular component disassembly

P-VALUE 4.608159707077e-06

CORRECTED P-VALUE 0.00845136490277923

NUM\_ANNOTATIONS 17 (of 111)

ANNOTATED\_GENES O75366, Q13796, P56270, O95425, P50897, P10636, P27816, Q01082, P60981, P47756, Q16621, Q01105, P11277, P99999, Q13794, P17096, P35241

-- 130 of 1834--

GOID GO:0030832

TERM regulation of actin filament length

P-VALUE 4.75928693825399e-06  
CORRECTED P-VALUE 0.00872853224475782  
NUM\_ANNOTATIONS 14 (of 78)  
ANNOTATED\_GENES O15511, O75366, Q13796, P62330, P61158, Q9BPX5,  
O15145, O95425, Q01082, P60981, O15144, P47756, P35241, P11277

-- 131 of 1834--

GOID GO:0031327

TERM negative regulation of cellular biosynthetic process

P-VALUE 4.95665589395541e-06

CORRECTED P-VALUE 0.00909050690951423

NUM\_ANNOTATIONS 48 (of 564)

ANNOTATED\_GENES P41182, Q06546, Q03014, Q9HCS4, Q12830, P61925,  
Q96BD5, Q9ULR5, Q00577, Q14469, P01137, P63165, P40763, O75427, Q99967,  
Q15326, P48552, Q02535, P16989, P14316, P63279, Q53EL6, Q01658, O75190,  
Q9P0J0, O15534, P55055, O15054, Q9Y576, Q06413, Q9NZU5, Q13422, P08651,  
Q03989, O43251, P62263, P31949, Q13207, P09429, P17947, Q9BRP0, P10071,  
P35227, P27348, O75943, Q12906, P17096, Q13542

-- 132 of 1834--

GOID GO:0046632

TERM alpha-beta T cell differentiation

P-VALUE 5.13003723981849e-06

CORRECTED P-VALUE 0.00940848829782711

NUM\_ANNOTATIONS 9 (of 32)

ANNOTATED\_GENES P31785, Q15306, P41182, P33681, O75995, P00491,  
O00203, P10914, P43405

#### *4. Genes from the biggest cluster of correlation vectors*

P-value cutoff 0.01

Calculate FDR Yes

Gene list Uploaded file Biggest\_Cluster.dat\_SwissProt.dat

Annotation file gene\_association.goa\_human

Evidence codes included IEA IEP IGI NAS IPI ND IC ISS NR RCA IDA IMP  
TAS

Unknown identifiers A2RUA0 A2RUA0 A0PJ92 Q05CG6 Q9P150 Q6ZVC8  
Q6P526 Q5R371 O94800 Q96FZ2 Q6IA94 Q63ZY4 A0PJ74 Q59GN6 Q9P164  
A2RU45 A2RRE5 A2RRE5 Q8N1A2 O00302 A1L147 Q05BR7 O60535 Q13254  
Q6FII3 A0JLR2 Q24JQ7 Q0VA89 O15091 Q5JJP4 Q9H377 Q96CZ6 Q0P5U9  
Q53HV3 A1L189 P57738 Q6AZW6 Q59FL3 Q6NZ49 Q658M9 O75143 O75143  
Q20WK0 Q59GG8 Q8N718 Q6FHB0 A0PJF6 Q71RC1 Q2TBD5 Q6PKH9 Q6PKH9  
O43573 O95654 Q59EZ9 Q7L665 A3E342 A0FIK7 A0PJ83 A2RUE0 Q8NDT0  
Q0D2H3 O15277 Q547V4 A0PJF8 Q68DZ4 Q96BQ9 A1A4C4 A1A4C4 Q53HE0  
O95410 Q05DJ2 O95873 Q7Z5R3 Q5D035 Q96FR0 Q13058 Q96DI0 A0JLQ9  
O14851 A1ECK7 Q5JPF0 O60696 A1X4Q1 A0PJ51 O14612 A1YRJ5 A0MNP5  
A1A583 A1L4F5 Q05BJ3 Q6NYC6 Q9BVX8 A1L497 Q53GB1 A1L4C5 P49646  
P78512 Q6ZMY0 A2SX35 Q6ZNP9 A1L484 Q9NUU2 Q0VA92 Q8IZ25 Q8IZ25  
A1L3V3 P05184 P05184 Q9Y2L2 Q52LH3 Q07941 Q6NUI8 A0AV52 Q6ZNJ0  
A2RTY4 Q6ZSD8 Q6ZNP9 Q59FB4 A2VDI9 Q2TBF1 Q5U5M0 Q9Y3X0 A2RUI4  
A0JLN4 A0JLN4 A1L4K5 A1L3A9 A0JLP2 Q5VY75 Q76N27 O75560 Q8TBA2  
Q6GTN3 A1L401 A2RUE5 A0FDN7 Q05BW1 A2VCT8 A1L3D4 Q5H9P8 Q5D221  
A0PK03 Q580R0 Q08AL8 Q08AL8 A0PJI2 Q4KMZ1 Q6UY31 A2RUC3 A0FDN6  
O95141 A3KME7 A1L475 Q5ICN7 Q14543 Q9Y2M2 O60269 Q14C73 Q05DQ4  
O43849 A0FKD1 O14858 O15414 Q8WU59 Q9NTU6 Q6ZWF5 A2RRL8 Q6XYC3  
A2RUN4 O94975 A1L4C2 Q68DG7 O75780 Q3SXM9 Q9Y2C8 A3KMG0  
A3KMG0 A1L4G7 O14598 A1L4C4 Q9P143 Q53Z19 A2V838 Q9UI77 Q8WWI3  
A1L4K7 A1L306 Q8WXQ4 Q6ZSM4 Q5JPD9 Q6B4S2 Q32MB7 O95616 A1L457  
A0AVJ9 Q24K25 A1L4F4 A1L4P6 Q02313 A2RRP8 O14883 Q8TBJ3 A1A516  
Q13006 Q53FM3 O60595 A1L4G3 Q8TCC2 A1A573 Q03715 O00617 Q9Y3K2  
Q1ZYL4 Q3KZ25 A2RRQ4 Q53H64 Q6P1Q3 P50290 Q2TB19 A0JNS4 Q4VC22  
A2RTX9 A0PJJ7 A0PJJ7 Q5W9G7 Q0PW94 A0JP10 Q8IZW1 O14790 A2RUL8  
Q14805 Q6NSW9 Q1ZYL4 Q9NZ54 A0AVS9 Q3SYH6 Q9UBM8 A1L4P0 Q9BWJ2  
O43210 Q24K28 Q9UHS7 Q9UHS7 Q9P185 Q9P139 Q9P1F5 Q9P145 Q59FM7  
Q9HA94 Q9H960 A1L4Q0 Q13647 Q3YL90 Q9BYH2 A1Z2K1 A1Z2K1 A0AV42  
O97985 Q9H5F0 A2VDJ1 O15480 O15481 O15481 Q24JT5 Q0VAI3 Q6PEY9  
Q8TDA3 A1L473 A2RUK1 Q6A165 Q05KQ8 Q14267 A1L4C9 A1L3Y2 O15070  
Q5Q0U2 A2RRC6 Q8N5B6 A4IF47 A2RRM5 A2VDJ2 Q32LY1 Q9P0Y9 Q9UHT3  
Q9UI72 Q9H879 Q9H8N2 P33763 Q8WWC1 Q9UHT2 A2RRB8 Q14CE6 A0N6Y5  
Q6ZSM9 Q569H2 P60568 A2RRG5 Q5GIA7 O43533 O95173 A1Z2L5 A0N6Y5  
Q2M1U8 A0AR27 Q05C09 Q05524 Q2TB20 Q8VCT4 Q4QQI4 Q6IPX8 O60448  
O95234 Q5HYM4 P48763 A0JLT8 Q15509 Q9Y4U2 A2VCL0 Q05CF5 Q5VUZ2  
Q6P143 Q9BZ60 Q7Z7D0 A1L4C9 Q9UHV1 Q9HBS7 Q9NWX7 Q2NKM7  
Q9NYI3 Q9NW83 Q9NW83 Q7Z7D0 A1L4L3 A1A4D9 Q9P1N7 P30098 Q15531  
Q08AL8 Q08AL8 Q08AL8 Q86V11 Q9P1J6 A2RRG6 Q8N4C1 Q9NRJ5 Q9P1N2  
O43848 O43848 A1L429 A1A516 Q15426 Q53FI3 O60811 A1A4V2 O14603

A2NHL8 A1A510 Q70LR7 P05184 O60863 Q6GX22 Q8IVZ9 Q2PW48 Q8IVZ9  
Q6NTC6 O43531 O00547 O95410 Q59GK7 Q14CE6 O15544 O43467 A1A514  
Q8WWI3 Q96JP3 A2RRN8 Q14D68 Q5U0Q9 Q0VAG5 Q14CL2 O43695 A2RUS0  
Q4VBL3 Q6IFQ2 O95626 Q96MJ0 A1A4Z4 A2RRL5 Q3B7K0 Q56D06 Q56D06  
A0A4Z1 Q6ZV54 A0MSJ5 Q59FL0 Q96SM9 Q96FK3 Q6ZUN4 Q6ZUN4 Q566Q2  
Q3ZCT3 A0AUX0 Q59HH1 Q6IPL3 A2BDD9 Q5U5Z3 Q5HYG9 Q7L551  
Q53GQ8 Q14422 A2VCN1 Q9BRT6 A0T4C8 A0PJJ2 Q8WU59 A1A516 Q5ST97  
A1L471 Q17RA1 A2RUM7 A2RUM7 A1L3U5 Q59FS2 Q59FS2 O95173 Q9H377  
Q08EJ9 O95151 O95358 Q6AZ91 Q6FGQ9 Q32M35 O97985 A1L4F9 Q59GM1  
Q17R58 Q9BUN9 A3E342 P43363 Q9HBA7 Q6ZT30 A1Z2M2 Q05CV5 Q6FGS2  
A0SEH4 Q8NB23 O43408 Q59EF4 Q9Y4M8 Q149N1 A1L4K2 Q9HD86 Q86V69  
Q9BU22 Q6PJ79 O15059 A2RQD9 O60321 Q29863 Q29863 Q009A7 A4FTX2  
O94987 Q9H3C0 Q66K19 Q0VAG5 O75062 Q05KQ8 A1L4K2 Q8NE34 Q9UI85  
Q0D2I6 Q0PW94 P05184 Q59GK7 Q68DB0 Q68DB0 Q6P526 A2VCT9 O75780  
Q0MWT5 Q6ZTF7 Q17RE6 Q1ZYL4 Q4VAM4 Q6P525 O43862 O43862 O95173  
A1A4D9 Q9UHU9 Q6IPL3 Q6PJE2 Q495S3 Q9H3A2 Q53XZ8 Q9H3B4 Q68DX6  
Q6IAQ4 Q08AF4 Q05CF9 Q0P6H7 Q53SF7 Q86Y85 Q2M1I4 Q2M1I4 O60770  
Q5Y191 Q0MWT5 Q0MWT5 Q0MWT5 Q0MWT5 A0A5E5 A1L3Y0 A1L3Y0  
Q494X1 Q6FHX1 Q6FHX1 Q6P525 A0FIK7 Q70LR4 O00547 O00547 A1A5B2  
O43514 A2RQD9 A2RQD9 A2N4P8 Q5T0M1 A0FKD1 Q6P1K4 Q6ZSM2  
Q2M1U8 Q2M1U8 Q0QD41 Q05DJ2 Q9P1E6 O15421 Q0VGG8 Q8WU59  
Q59HH1 A1A4D9 A0JNS4 Q9P171 A1A516 Q9H3B8 Q9H383 Q9H084 Q9BXE4  
Q9BY25 Q9BZA1 Q96RM9 A1L4B3 Q59GK7 Q68DB0 A1A4E0 O60770 A2VCQ7  
A2VCQ7 A0MSJ5 Q13632 O00417 A2RUN2 A1A4V4 A0A4R1 A2NB44 A0N5G7  
A2JA17 A2J1N8 A0N5G7 A0A5C9 A0NA61 O94975 Q9BRP9 Q52LK8 Q4G0V0  
O95953 A1L2Z5 O43849 Q5T0M1 A1L3Y0 A0N5G7 Q59H96 O43862 A1L493  
Q06518 A1L2Z5 A2RU65 Q52LL2 A2J1M5 Q2M273 A0AVL6 Q07941 Q07941  
Q13871 Q59FU0 Q08AD6 Q17RQ6 Q6P9D1 A1L3A9 Q498B9 O15026 Q69YR9  
A1L3V4 Q5U000 Q53GQ8 Q8N2L6 Q5HYI6 Q08AD1 Q8N8E1 Q05DS6 Q05C86  
Q2M2X9 Q59EU1 Q7Z4L4 A0JNW5 O60276 Q96IX4 O60303 Q05B42 Q05B42  
Q86XV1 Q1HE27 A0AUL9 Q6ZNP9 Q6P1K4 A2RRE7 Q402F7 Q2NKM7 Q13209  
O94969 Q96BN6 Q5PXE8 A1A5C4 Q8WV14 Q53EQ3 Q71RC1 O15026 A1KYQ8  
Q6ZT78 Q6TAR1 Q6NY19 O15016 Q8IWK3 Q6ZNT2 Q6ZNT2 Q6ZNT2 Q8IWK3  
Q59FN6 A0PJF7 A2VCL5 Q05BP9 Q6ZNJ0 O60643 Q86VX6 Q96IX4 Q05D72  
Q9NUU2 A2VCU2 A1L3V4 A2RRN8 Q53GQ8 A1KYQ8 A1KYQ8 Q32MI4  
Q6NV74 Q4G134 Q59G34 Q6ZNS4 Q49AG4 Q17RA1 A2RU06 O00433 Q0D2H3  
O15206 O60310 O95324 Q6ZNS4 A0AVL6 Q659G2 Q8N2T0 Q8N2T0 Q71RF5  
Q3ZCM5 O95561 Q2YDB1 Q2YDB1 Q6AHW5 O60535 O60535 Q6IC03 Q6IC03  
O75560 A0PK90 A1L4G7 A1L4K3 A2RTZ9 Q2M1Z1 O95558 Q6NTC9 A1A4V4  
A2RRG4 A2RU65 A2RU65 Q6NTB8 Q3SYA9 Q8N3U5 Q4QQJ4 A4FTV9 Q9H728

Q5W111 Q14675 Q8WUA6 Q59FU0 Q5ZEZ6 Q63Z38 Q29RV9 Q86SY2 Q05BT0  
A1L189 Q2HXV1 Q96AW6 Q2TAC2 Q9BSG2 Q8WTU5 Q8WTU5 Q8WTU5  
Q6P2M3 Q1ZZU4 Q5JVG2 Q6PJ05 A1L4N4 A2RRH1 A1L374 Q6ZUJ2 Q6ZWI7  
Q6ICC2 A2RRQ7 Q5BKU6 Q0P618 Q6ZP65 O14892 O95192 Q99777 Q6PJ28  
A0A5C9 Q05DR2 Q68CY0 A1L1B5 O15026 Q6ZTP2 O95327 Q05CW2 Q8N0Z3  
Q96IZ2 O94942 O95192 A1L3U0 Q8N0W5 Q8N0W5 O94852 Q674X4 Q8WUA6  
A1A4D3 Q9GZS3 A0PJ59 Q3C1X3 A0PJ74 Q69YW5 Q9H8N8 A1A4H0 Q6PJQ7  
Q149M6 Q5H9N7 O60771 Q68CY0 Q68CY0 A1YRJ5 Q9BYB2 Q3C1X3 A1A5D2  
A2TJK5 O00437 Q96MT5 Q9Y4N5 A2RUB8 Q86XU6 Q86XU6 Q6PIW0 Q3MIY3  
Q86XC4 Q9HCF8 Q4F964 A1L147 Q9UL09 Q53SF7 Q8TF58 Q5G0E1 Q3MJD8  
Q3MJD8 O94954 Q68DI8 Q6MZN3 Q59ED6 Q4G1C6 Q4G0Q1 Q9UMX4 Q0VA96  
Q8N5D0 Q8N2X2 A0JLU2 O00321 Q86TP7 Q8N4I4 A0PJU8 A2NVQ1 Q9H926  
Q3ZCM5 A2RRN8 Q3KR06 O43417 Q13209 Q69G40 Q53G14 A1A516 A2RU77  
Q8TCA7 Q8N7K3 Q69YW7 A0PJI5 Q7Z377 A2RRA5 Q52LH3 Q9BYA5 Q9BYA1  
Q9BYA6 Q9BYA6 Q17RQ6 A0N5G7 Q6ZSQ8 Q8N9V6 A2NVQ1 A0PJG0  
Q69YW0 A1L4K9 Q9H752 Q6NSI4 A1L3V3 Q86XC4 Q8IVE0 Q24JS4 Q24JS4  
Q52LZ5 Q7Z3V9 Q3B7X7 O94964 Q9H800 Q9H7N3 Q8TCK8 Q6FHZ7 Q7TS98  
A1L3B5 Q59GG6 Q9BY99 Q69YW7 Q49AS0 Q96MM2 A0PJD2 Q17RH5 Q0VDA5  
A1L3A9 O43848 O95611 Q53HN3 Q53HN3 Q5W9G0 Q8N5D0 Q5T8X6 O60311  
O95658 Q8IUQ3 Q05CF9 Q68DS0 Q53EM9 Q5W9G0 Q8WY96 Q6ZUY1 Q6GU34  
Q6GU34 A2VCR1 Q6ZPB7 Q2TB00 A2NVQ1 Q2TB00 Q8N0W5 Q68CV8 Q05C06  
Q8IYU1 Q3ZCW0 Q5Q0U2 Q9BUN3 Q6P2R5 Q6AZW6 Q05DG5 Q6ZUA4  
Q96PN1 Q99843 A0JLU2 A0JLU2 Q5D0K4 Q5D0K4 Q49AH7 Q38Q88 A1E4E7  
Q9H7M3 Q15909 O94987 Q495V8 Q5W199 A2RTY4 Q0VAD3 O15418 Q59GN6  
Q8TBJ7 Q8N655 Q96D16 Q6ICM2 Q108M9 O00437 A1L0S8 Q8N0S4 Q8WV27  
A0JP11 A2RU77 O14885 Q9H7M1 Q9H7M1 Q6PJB7 O60696 Q8N0S4 P16045  
Q9BVC0 Q9NZK9 O60696 A0A5E5 Q6Q1S4 A2NVQ1 A0N5G7 A1A4E0 Q5TDS4  
Q5THK1 A2NYQ7 Q65ZS4 Q3SYA6 Q9UFV3 Q9Y4N2 O95127 A2JNH0 Q6PJB7  
Q29RV9 Q29RV9 Q5GMH6 Q969N5 A2RRF5 A2RRF5 Q6I9Q8 O14606 Q5BQ95  
O14605 A2RTZ9 Q53G36 O14634 O00246 A0N5G7 O14885 O95690 Q0D2Q4  
O14635 Q59GC8 Q59GC8 Q0IJ64 Q5I0G1 Q8WW65 Q5I0G1 A0JP11 Q59ED9  
Q9NWW9 Q9NWW9 Q6ZSJ4 Q9H5I0 Q56VN4 Q6ZSJ4 Q9H282 Q9H282 Q8IU63  
Q9BZ01 Q6ZNP9 O15418 A0A5C9 Q9BYA0 A0A5C9 A0A5C9 P50889 P50889  
Q9UEL2 Q12757 Q12757 Q12839 A0N5G7 Q8TAV0 O75785 Q8WVC1 Q15909  
Q14553 Q15905 A0JNS3 Q9UHU6 Q8N0X7 Q13528 Q13552 Q13552 Q9BU51  
Q4G196 Q13587 Q59ED9 Q701L6 O95192 A0A5E5 Q0QD40 A1L389 Q70LR4  
Q96MA9 A2NVQ1 A2NVQ1 A2NVQ1 A1L4L3 O00246 Q9P0F3 O00247 O00247  
Q9UGP3 Q9UGP3 Q15332 Q08E72 O43417 O43616 O43616 Q3KT79 Q6KAL7  
O75562 Q05DJ2 A1L431 A0A5C9 A0A5E5 Q9UBT1 A0NA61 P60568 Q14892  
Q6TV06 A2NYV5 Q2TB22 A0JLQ9 Q2TB22 Q496L7 O43247 Q2M1Z1 A0N5G4

Q9Y4N2 Q14D68 Q14D68 A2NYQ7 A2J1M5 Q53EM9 A0N5G4 O14606 O60809  
Q49AH7 A1L4K9 O00381 O95558 Q5BQ95 O77966 Q6ZT74 A1L417 O95192  
A2NVQ1 O95317 A2RRF5 A2NVQ0 O95680 O95317 Q6ZVU5 Q53Y35 A0NA61  
Q96B23 Q05BP0 Q7Z6K5 O15398 Q6NXP5 Q5CZ68 Q14675 Q6NUM0 Q6ZUP8  
Q86X13 Q05DU1 Q6ZRS3 A1L2Z2 Q2VPJ9 Q9UHT2 Q5CZI1 A1L192 A2VCM6  
Q6ZRZ9 Q1HDL1 Q8WYV9 Q6ZN89 Q9HAH7 Q6ZP15 Q86V87 Q9NQ89  
Q6IA00 A1KYQ8 Q53H75 Q53FP3 Q53ES5 Q284T0 Q9NXE8 Q53F81 Q2NL84  
Q49AG1 Q6ZWF9 Q53GE8 Q14BN2 Q6I9X7 Q9H2Y3 A1A527 Q8TBR4 Q59H51  
Q17RM7 Q86VC2 A0PJP0 Q14787 Q6IA34 Q53FH5 Q6NXR4 Q9H629 Q6UXZ8  
Q05DB9 Q96BY7 Q8N342 Q2PEF9 Q7Z2T0 Q3ZK31 Q6ZN43 Q68CK3 Q5BKU3  
Q6ZMX3 Q53Y57 Q59GS4 Q53EY2 Q8IYD2 Q6ZRE9 A0PJE0 Q5T465 Q0VAA6  
Q59H72 Q3SX54 Q6FIF5 A2VDJ3 Q96NS8 Q96DZ0 Q5D079 Q2TU81 Q2Y122  
Q53H69 Q8NBS4 O14852 Q8WTW9 Q86V32 Q9BUN5 A0PJI9 O14881 O14881  
A1A4F2 Q8NC66 Q05D30 Q6P2S1 A2RUA9 Q53EY9 A0PJ50 Q6ZSP3 Q7L4P6  
Q1ZYL9 Q6ZTZ2 Q4G0W6 Q2KHR3 Q9NUS5 A2RUA9 A2RU30 Q5JV87 Q32UJ0  
Q6NSL8 Q7L876 Q4G182 A0JLS0 Q53GY5 Q05CA1 Q546Y9 A0PJB6 Q6P2R4  
Q14BN2 Q658J9 Q5T089 Q8NDY0 Q5H9P4 Q8WUT8 Q8NE76 Q8IV32 Q86US9  
Q49A73 O75406 Q5H9P3 Q53GN0 Q9HAB5 Q6NXN9 Q32LY7 Q49AH6 Q14C81  
Q59FS2 Q0P5R3 Q5XLJ0 Q8WV30 Q078S9 Q9BS47 Q7Z402 Q5XKG8 Q6P9E1  
Q9H7D2 Q6ZNY5 Q8NI58 O14885 Q6IAI7 Q8NEC7 Q6VAK5 Q4V755 A0AV48  
Q4G0P3 Q9P1D2 Q53FD0 A0PJA6 Q69YW4 Q3KP44 Q2TAM4 Q8N8X1 Q8N8X1  
A2RTY8 Q5EGC3 Q53G47 Q08AI8 Q6N028 Q6NSX4 Q6PJC6 Q4KN31 Q9H2F9  
Q6UX54 A1L3U4 Q0VAG7 Q53YU7 Q86XZ6 A2RRG5 A2RRG5 Q9H5F7 Q3SYG5  
Q0VFX0 Q8N4H0 Q9P1G2 Q05DH0 A0AVG2 Q9H6K0 A1L4A9 A1L4A9 Q6AI20  
Q9Y6C7 Q6P2P0 Q05C46 Q59H20 Q2TB81 Q2TB81 Q9H7C9 Q6P1W3 Q6IAG3  
Q6UX78 Q6GU65 Q0IJ45 A1L4L0 Q9NWX5 A0AV51 Q0QD47 Q4QQJ5 Q6MZP9  
Q6ZUS5 Q9H8S5 Q9H8W2 Q86XI4 A2RRP9 Q4KMX1 Q6NT65 Q52PK5 Q86VS3  
Q2M3K9 Q6V1P8 Q9H5L9 Q53GE4 A0AUY7 Q9GZQ9 A1L421 Q69YX3 Q9P175  
A2RRQ9 A2RUN3 Q9H745 Q6NT40 Q4QQJ1 Q7L876 A1A523 Q49AL9 Q9H7W3  
Q29RX7 Q16457 Q5CZ74 Q53Y33 Q548M6 Q9BVX4 Q6R308 Q8NC49 Q9NW77  
O43162 Q9HA75 Q9HA27 Q0P6D6 Q8N396 Q8WW99 Q05AH5 Q8TC99  
Q2NKK0 Q9UH64 Q6YJI3 Q45XF9 Q45XF9 Q9P1L5 Q6ZQY1 Q5JPC9 Q59GC2  
Q9H7X5 Q9H8N1 Q3LFQ0 Q9NWC0 Q59G51 Q8WWC3 Q6U949 Q53YJ5  
Q8N1K6 Q4KMX7 Q9H7Y2 Q9HA59 Q9H654 Q4G0X9 Q4G0X9 Q52LY3  
Q0PNE2 Q9UHS9 Q6ZWF9 Q6UY01 Q1M0P3 Q5JPH1 Q08AN2 Q9UI51 Q9NRI7  
A1A574 Q9P166 Q08EI2 A1A4W3 Q9P1F8 A0PJA7 Q9P136 Q14D51 Q9H5X8  
Q29RW5 Q9NWP0 Q9NV39 Q9H838 Q642I8 Q9NVK6 Q9NW52 Q9UI89  
Q9NZY7 Q9NZW6 Q9UI59 Q9BU82 Q9P142 Q9P1J0 Q14F51 Q14F51 Q9HA29  
Q9H9U3 Q9H9R1 Q9H8Q6 Q9H8C4 Q2T9H3 O00437 Q9HA39 Q9UHU7  
Q6ZTE4 Q56UR8 Q7Z5R3 A0AV76 Q9UI82 Q9NZW7 Q08AN7 Q8NEH7 Q9P1E7

A0AVI9 Q9UMX8 A0JP21 Q59G31 Q8N2T2 A0AVP6 A0AVP6 Q9P1D0 Q0VAI9  
Q2TU86 Q9H7S1 Q5KU17 Q9NRB8 Q9P147 Q9NXW5 Q9NXP9 Q9NV44  
Q9NUV3 Q9H8N8 Q9R0H2 Q96MY0 Q9NX68 Q2TAK4 Q4FD35 Q3MII9 Q3SY90  
A2RRB7 Q2PAD7 Q9H627 Q9UHU4 Q9UHT9 Q9UI73 Q9UI57 Q9UI52 Q9UHU6  
Q59EX6 Q9P197 Q9P184 Q9P138 Q9P1M3 Q9P1K3 Q9P1K0 Q9P1J7 Q9P1I3  
Q9P1H3 Q9P1G6 Q9P1F7 Q8WUR2 Q9P1C4 Q2KHM5 Q9NQR7 Q9HD52  
A1L447 Q96D16 Q9HAJ0 Q9HAF0 Q9HAE1 Q9HA85 Q9H9P9 Q9H8X3 Q9H881  
A0PJH0 A0AVI6 A2RRR8 Q9HAC2 Q9H721 Q9HAA7 Q9H8Q9 Q8N9Z8  
Q2M1H9 Q68VJ3 Q3B822 Q9P2N6 A1L4F2 Q69YJ4 A2RUF2 Q2PAD7 A1L4K6  
Q53FE2 Q2M3F0 Q7Z5S1 Q6PJF4 Q59FW2 Q9BZQ2 Q18P99 Q32Q36 Q7Z3A0  
Q59GW9 Q6ZSA1 Q4G0Y8 Q8NA09 Q05CU0 Q52LS7 Q0P513 Q6P1W3 Q9BXU2  
Q9P1F9 Q9UHM2 Q9H051 A0PJU9 Q502V2 Q63ZY3 Q9NRJ2 Q9UN01 Q2N1I3  
O60531 Q9NWJ4 Q9NXV8 Q5CZ82 Q9NUI9 Q2TAB0 Q6ICJ8 Q9NT86 Q5H9L9  
Q3B861 Q9NYI9 Q9NYJ6 Q9NXD8 Q8WUE5 Q13278 Q8TBU7 Q9UI90 Q9UHU2  
Q9UHU2 Q9P1A3 Q9P1A1 Q9P160 Q9P1D8 A1A4X9 Q27Q50 A1KY36 A0AVR7  
Q9P1G9 Q9P1P1 Q6NWP4 Q7Z5E7 Q96LD9 Q96LD9 Q9H7F6 Q14CN7 Q9H758  
Q9H6Z8 Q3SXR2 A0AVD7 A1L4H0 Q9H606 Q9H5H6 Q5TGP6 Q9H5B9 Q9H5F3  
Q9H9G2 A2BDF4 A1L381 Q9NYQ2 Q0VFW7 A2RRQ5 A1L307 Q53F74 Q9H5U7  
A1A5C9 Q496K8 Q9H8K0 Q8N8T3 Q6IQ47 Q53Z57 Q6NWM5 Q2M257 Q5DSZ6  
Q5W009 Q4VBL6 Q32MQ2 Q8IW56 Q3SX80 Q502V6 Q68CR4 A0N1S0 Q6ISE7  
A1A513 A0AUK4 A2RRF6 A0N5V3 Q32MC3 Q6NWQ5 Q6ISR8 Q6ISV1  
Q32MC3 Q6IFM3 A2RRF0 Q6NTA9 Q6NTC8 A1L485 Q4KN04 Q05AG9  
Q0VAD7 A2RRN9 Q9H2N8 Q2VPE4 Q8N683 Q9BXU0 Q8TBZ7 Q9BXT5  
Q6AHZ0 A0PJV4 A0AVA4 Q32Q36 Q6ZTY7 O43573 A0PJB1 Q6IAJ9 Q8N2E5  
O43788 Q6P2P0 Q8WWC3 Q548M6 Q4VTT3 Q5JPH1 Q59H12 Q53F65 Q9H349  
A2RUP0 Q6PJF8 Q2M238 Q15458 P37290 Q6MZJ2 Q53ZZ2 Q4VTT3 Q6ZRB4  
Q53EV8 Q9NX31 Q9UMB4 Q8N5L1 Q6PJI9 Q6ZUF3 Q96N11 Q53ZZ2 Q9HA97  
Q16439 Q38IJ5 Q32MI4 Q4G0T4 Q5BKX5 Q29RW3 Q2YDA0 Q8N2E5 O95262  
Q24K25 Q52LH3 Q9UI77 Q6TKS8 Q0D2M5 Q6Y2L2 Q9H6V9 Q9H6V9 Q4G0Q1  
Q0VGM6 Q53GJ9 Q6PJM9 Q9NXW9 Q9GZQ9 Q9BYA9 Q9NTU6 Q6P9B6  
Q6PJP3 Q49A50 O00446 Q3B7I0 Q4LE77 Q32MA1 Q1A5X7 Q8N9I4 Q68DS0  
Q6ZNR2 A0PJD2 Q8NDN3 A1L180 Q7LBY6 Q8NCS9 Q6NYC6 Q659F9 O15026  
A0PJF9 O60643 Q96FK3 O43788 Q08ET8 Q59F95 Q6IA31 A2RU51 O95276  
Q96HU6 Q53ZZ2 Q53ZZ2 Q8NC36 Q6NUK0 Q86Z03 Q29863 Q4VTT3 Q59FT8  
Q6F5E7 O95712 Q9BV19 Q8N2D7 Q9UQL0 Q659F0 Q8N2E5 Q49AT6 Q548D0  
Q59F90 P12994 P12994 P12994 P12994 P12994 P12994 P06956 P06956 P12994  
P12994 P12994 P12994 P12994 P12994 P12994 P06956 P06956

Terms from the process ontology with p-value  $\leq 0.01$ .

The total number of genes used to calculate the background distribution of GO terms is 38594.

-- 1 of 2799--

GOID GO:XXXXXXXX

TERM unannotated

P-VALUE 1.45385826156082e-86

CORRECTED P-VALUE 4.06934927410873e-83

NUM\_ANNOTATIONS 1795 (of 11418)

ANNOTATED\_GENES Q9P1A1, Q6ZQY1, Q2YDB1, Q59FU0, Q9P203, Q00214, Q9UBT1, Q96FZ2, Q86YD7, Q8N0X7, O60595, A0AV56, Q9H5L9, Q9BXE4, Q149N1, P40198, Q5H9P8, Q0P513, O14881, Q15032, Q8NC06, Q9H960, Q96AZ1, Q05BP0, Q6NZ49, Q5H9P3, O94942, Q6Q1S4, Q92661, O75678, O95324, Q5JTD0, Q6NY19, Q53GE4, Q6ZN43, Q96AW6, Q6PJ79, Q9P188, Q86TH1, O95192, Q9NRJ2, Q6FII3, Q96SM9, Q12767, A0NA61, Q5U5M0, O95358, Q9NUU2, Q8IUQ3, A1L3U5, Q9BUJ0, O95611, A2SX35, Q8NE76, A0PJF6, A0PK90, A2BDF4, Q3ZCT3, A1L0S8, Q9P143, Q86V11, Q9HA39, Q5HYM4, O00428, Q9HA27, Q02313, Q9H8N1, A2RRG6, Q9BT56, Q6L8Q7, Q14675, Q9H084, Q9Y2M2, Q9Y3P4, Q2NL84, Q53Y33, A0JP10, Q9H8N2, Q2VPE4, Q6UY31, Q9BUN9, Q5JPP4, Q14CN7, Q5D035, A1L192, Q9H728, Q6A165, Q86X13, Q92615, Q548D0, Q9BZQ2, Q9P1K3, A1L4B3, Q05AG9, Q08AD1, Q6PJE2, Q05BW1, A1A5D2, A1L3U0, Q86Y85, Q2VPJ9, Q9UN39, Q69YW5, A2RUF2, Q6P1K4, Q0VFX0, Q6NUM0, O95814, Q9Y5Z9, O60941, Q9HBV2, Q9P0S2, Q9UHU4, Q8IVZ9, O14909, Q3KR06, Q86US9, Q6ZN89, A0PJI5, A2RRQ7, Q6GTN3, Q2TU86, Q9H7N3, A0PJJ2, O15014, Q9BYA6, Q8VCT4, Q6ZRZ9, A2VCR1, Q9Y3K2, A1L4F3, Q9HAB5, Q6N028, Q502V6, Q5JST6, Q5BKU3, Q12916, Q6UX78, Q14CL2, Q0P6H9, O43849, P22676, Q6NSL8, Q9HA75, Q0P6D6, Q13647, Q32MB7, Q9H8Q9, Q8IYD2, P37290, Q9BUN3, Q8WY96, O60276, Q14805, P50479, Q9NYI3, Q658M9, Q52PK5, A1L2Z5, Q53EM9, O75579, Q9P0Y9, Q8N1A2, Q32MI4, Q9UHT3, Q8N9V6, O75113, Q53ES5, Q9NWW9, Q9P138, Q65ZS4, O43210, Q9P184, Q5T2S8, Q07020, P55036, A0PJB6, A2RRF6, Q13536, Q5XLJ0, Q27Q50, Q53FP3, Q5TAA0, Q6IAQ4, Q9H2F9, Q49AH7, O43862, Q8N5Y8, A0A4R1, O95803, Q9UHT9, Q8WUT8, Q6NXN9, A0N5G7, Q0D2M5, A0FIK7, Q9BZ01, Q53EQ3, O43469, O60770, A0PJB1, Q9NZW7, A2J1M5, A1A4V4, Q59EL7, Q9NX68, Q9H6V9, A1L4K7, Q17RA1, A1L497, Q6KAL7, Q6ZVK8, P27482, A1L4P0, Q9NWH2, Q9NVR0, Q05D72, A1L4F4, Q6ISV1, Q4KMZ1, Q8TCC2, Q59GG8, Q96FR0, Q6ICJ8, Q1RLM0, Q05DH0, Q08AN7, A2RUM7, Q6ZSQ8, A1L429, A2VCT8, Q9H5U7, P16045, Q52LH3, Q14892, Q9UF73, Q6U949, O95654, Q86V87, O14598, Q5HYI6, Q9UHU6, Q6PJP3, Q53GN0, Q0VA96, P48763, Q6ZVC8, Q5BKX5, Q96DZ0,

Q6ZVU5, A2NYQ7, P57738, Q9P1A3, Q0P5U9, Q9H5H6, P14866, Q05C46, Q9P1N7, Q9P1G6, Q8TBR4, Q8N2X2, A4IF47, Q6NSI4, A2RQD9, Q86V69, Q05C09, Q8NBE8, Q9R0H2, Q6UWF7, O14660, A0AV48, Q9H8C4, Q14157, Q6ZNT2, Q53G14, Q14C81, Q6PJC6, Q8IXX5, Q59G51, A2RUL8, Q13587, A0SDD8, Q5CZ74, O95680, Q9UI82, Q8WUA6, O94898, Q6ZTP2, Q8WYR1, Q2LD37, A1A514, O95690, A1L4C9, Q13254, O14634, Q6P143, Q6GU65, Q3YAD0, Q9BXT5, Q9BXU0, O15016, Q6ZTF7, Q53Z57, Q1HDL1, Q9NWS6, Q5T013, Q8NC36, Q6FHX1, A0AVI9, Q6ZMC9, Q2NKK0, A2RUA9, Q8TAV0, Q7Z5R3, Q9NRI7, Q4G0X9, Q6R308, P01833, Q6ZMX3, O95953, Q2NKM7, Q53YJ5, A0AUY7, Q59H51, Q6ICC2, Q7Z377, Q5W9G0, A1L4K5, Q14267, P35611, A0PJ83, A1L374, Q8IV32, Q96DU7, Q8NC49, A1L2Z2, Q8WV27, Q9NRJ5, Q9UH93, Q6AHZ0, Q6PQ7, Q6NTC6, Q4ZIN3, Q0VAG5, Q59ED9, Q96MJ0, Q9H654, Q8IYU1, Q58A44, Q6FHB0, Q9H5F3, Q12914, Q96BQ9, O94852, A2RRG5, Q53FM3, A1L180, Q86VS3, O15481, Q59G34, A3E342, Q6ICH3, Q12839, O75780, A1L147, O75884, O15398, Q9C086, Q9UHM2, O60696, A2NB44, A2VDJ1, Q8N5R6, Q9NWX5, O60809, Q59FL3, Q6NSX1, Q9NXZ1, Q6ZSP3, A1A5C9, Q6ZSJ4, Q9BVX8, P12994, Q8N566, Q6NTC8, Q08E72, Q5UW39, A0N6Y5, Q6NWM5, Q8TBU7, Q6ZV54, O95626, Q6ZNS4, A2RRQ5, Q9P175, Q9HBA7, A1A573, Q9UQL0, A1L471, Q8NEH7, Q9UI89, O14852, A0PJ51, Q9H9R1, A1L3V3, Q05JX5, Q96MA9, Q4V769, Q86XZ6, Q8TCA7, O60310, O75425, O95141, Q1A5X7, O94986, Q5G0E1, Q5H9L9, A2RRR8, Q0VAI9, Q53GT1, Q8N6P7, Q49AS0, O95968, Q6IAG3, O75526, P48454, A2JA17, A2RU65, Q13552, A1A516, A0JNS3, Q9BYA1, Q9NWX8, Q9NUQ8, Q63ZY3, A1L4C2, Q6IA94, Q05CW2, Q8N396, Q4G182, Q5I0G1, Q96LV9, Q6IA34, Q9H7S1, Q9P1I3, Q4G0T4, Q0IJ45, Q6ZTZ2, A1Z2K1, Q9H5B9, Q6FHZ7, Q5EGC3, A1L4N4, Q0VAA6, A0PJP0, Q9UL41, Q6PJB7, Q9BZ60, Q6ZP29, P30154, Q1MSJ5, Q6IAJ9, Q6ICM2, Q5W111, Q9H7Y0, Q7Z695, Q9BY27, Q6P1W3, Q8TAX7, Q9BRW5, Q8N718, Q8N655, Q0VAI3, A2RU45, Q8N0Z9, Q05BJ3, Q49AL9, O95127, Q59GG6, Q6P2S1, O95151, Q8N8X1, Q6ISR8, Q32LY7, Q9UHS9, Q9H8U3, Q659W3, Q59EZ9, Q8TC99, Q8WUR2, A1A4H0, Q07941, Q69YJ4, A1L4A9, Q9P164, Q8WW99, Q9BU22, Q9H3C0, Q9BU51, A1A5B2, Q9BVC0, Q5THK1, Q6NTB8, Q8WWC3, Q1ZZU4, Q8TB73, P20674, Q15458, Q9BS47, A2RUN3, Q49AG4, Q8IYF3, Q2TB20, Q14787, P43363, Q6Y2L2, Q16439, A2RTX9, Q7Z6K5, Q8N3P5, Q504Y1, Q53R12, A2RRB7, Q96N19, Q2TBD5, Q0VGG8, Q9NTU4, Q9UJV8, O75143, Q56UR8, Q0D2Q4, O14858, Q5T8P6, P06956, A0AUL9, Q6P499, P06731, A1L4C4, Q5H9P4, Q6ZNR2, A3KME7, Q9H7D2, Q56D06, Q3YL90, Q9HD86, Q7L551, Q9H0A6, Q659F0, Q8N8E1, Q642I8, Q6ZUN4, A1A4X9, Q9P1D8, Q4G0P3, Q9NWX5, Q2M3K9, A2VDJ3, Q2M1I4, P41217, Q4QQJ1, Q9NX36, A2RRP9, Q8TBJ3, A2RRF0, Q6MZP9, A1L3B5, Q496K8, A0PJF7, Q0IJ64, P50290, A2VCQ4, Q9P147, Q6AHW5,

Q9BXU2, Q59HH1, Q502V2, Q05C06, A1L3Y0, Q4FD35, P50889, Q3ZCW0, Q53ZZ2, Q9H813, O95785, A2VCL0, Q13006, A2RUG3, Q9P150, Q8N0S4, Q6P2R5, Q05DS6, Q6NUP7, Q9NWI4, A2VCQ7, Q9P1H3, Q53GY5, O00246, Q32Q36, A2RRN9, Q53FI3, O75937, Q8WU72, Q12799, A0PJE0, Q9H7M3, Q8N129, Q8IUA0, O15049, Q6TKS8, Q0MWT5, Q9NQT6, Q8N5L1, Q8N4C1, Q15735, Q8IYB4, Q9NXD8, O14885, Q14BN2, A0A5C9, Q13064, A0AV76, Q59FM7, Q6NSW9, Q59F95, Q59FS2, A2RRC6, Q59GC2, Q9H752, Q17R58, A1L4Q0, Q9NRI6, O95561, O43162, A0AVR7, Q546Y9, Q2M3F0, O43301, Q59G31, Q6UXZ8, A0PJA6, Q8NDT0, A2TJK5, Q8NI58, Q59GM1, O15070, Q9UI73, Q6ZS17, A0FKD1, Q15332, Q8N5D0, Q9NXW9, Q6ZSM4, A1L4K3, Q3MJD8, Q9UK55, Q9H3A2, O75562, Q0PW94, Q5KU17, Q86XH1, Q3B7X7, A0PJG0, O60535, A0PJ59, Q8N0Z3, Q24K28, Q9H6L4, Q59GW9, O60321, A1ECK7, Q2M2X9, Q05DJ2, Q15905, Q29RV9, Q2N1I3, Q2YDA0, Q69YW0, Q05D30, Q68DX6, A0JNS4, Q9H6E4, Q9H7Y2, Q7Z4L4, Q8IZW1, Q8TCT7, Q06518, O14635, Q8N2T2, Q99843, Q9Y4N2, A0PK03, Q9P197, A2RUS0, P43355, Q53FD0, Q8NEC7, Q05BR7, Q6ZUP8, Q8TEB0, Q96F15, Q13632, A0JLR2, Q0QD41, Q3KPI0, Q6ISS4, O60311, O60575, Q3SYA9, Q9UJT2, Q08AD6, Q59EX6, Q6ZU69, A1A4C4, A1L3D4, Q8NDN3, O43247, Q9H972, Q8NE18, Q9H2Y3, Q29RW5, Q49A73, Q9H0W8, Q32MC3, Q6ZUJ2, Q05DD3, Q9Y5L3, Q08AI8, Q6AI20, A2RRM5, Q5T8X6, Q6ZSA1, O60531, Q3B822, Q9P1F9, Q4VC22, O43788, Q9UHS7, P51116, Q6IQ47, Q96D16, O60863, Q9BSC4, A1L189, Q6P9D1, Q9BYA5, Q5T089, Q9NUL7, Q5JTH9, Q9BSU1, Q9H383, Q05C86, O15421, Q96IX4, A0JLP2, O60303, Q8WUE5, O43795, Q53Z19, Q6NWQ5, Q9P1M3, Q3MII9, O60687, Q68VJ3, Q9H838, Q5D0K4, Q9BYB2, Q6B4S2, Q9UI77, A0AV51, O95658, Q6NTA9, Q53GQ8, O15091, Q0VAD7, Q49AJ3, A0AVG2, O15418, Q9NQR7, Q9NUS5, A1L493, Q4VBL3, O94954, Q674X4, Q6ZRS3, Q96PN1, Q8N342, A1A523, O94969, Q5DNC5, Q9UNW9, Q5BQ95, Q59GT2, Q9Y2L2, Q59GN6, Q53H69, Q6ZUF3, Q5ST97, Q9UMP8, Q9H8X3, Q9HA29, Q15509, Q6ISE7, A2JNH0, Q2TBF1, O00433, O60771, O14851, Q9BX51, Q05CH2, Q7TS98, Q2M238, Q9P185, A1L3U4, Q4QQJ4, Q5T465, Q05AH5, A0PJU9, P06028, Q2TB19, O14606, Q86TP7, Q5GIA7, Q8IWZ4, Q69YW7, Q13465, Q53H75, Q96CZ6, Q9Y6C7, P30098, Q8N350, Q9P1F7, Q498B9, Q15532, Q6P9B6, Q6IPX8, O00302, Q6FIF5, A0A5E5, P43366, Q9BZY9, Q86V32, Q9H9V4, P15941, Q9UI51, Q5JPC9, Q5T0M1, Q6F5E7, Q9P145, Q9P142, Q5ZEZ6, A1L1B5, A0FDN7, Q7Z3V9, Q4QQI4, Q6ZSC8, Q96MY0, Q59EF4, Q9P0V8, Q96LD9, Q6ZPB7, A2RUP0, A0PJH0, A2VCN1, Q05DU1, Q6NXR4, Q59H96, A2RU51, Q7Z7D0, Q569H2, Q9NXU5, Q9BR11, Q5JPH1, Q9BUA6, O15059, P26196, Q9BW72, Q078S9, Q8WWC1, Q66K19, Q8IVN8, O15414, Q2KHT4, Q6FGQ9, O43573, O95704, Q8TF74, Q5HYB4, Q32MA1, A0AVL6, Q9NRB8, Q6ZSM2, A0PJ92, O43616, A0AVA4, Q9BZA1, Q9NWC0, Q6UY01, Q6NT40, Q86XI4, Q59EV5,

A2VCU2, Q6PJM9, P78559, Q52LL2, A1KYQ8, A0JLQ9, P43364, Q9NYI9, Q9HAE1, Q8IWK3, A0JLN4, A2RUB8, P04196, A1X4Q1, Q9BVX4, Q9Y2B2, A0AVJ9, Q32P44, Q3SYG5, Q68DS0, Q9UHT2, Q96JP3, Q9UMX4, Q5TA45, A1L389, Q02985, Q9NWX7, Q71RC1, Q9Y2C8, Q8TBZ7, Q9NRX1, Q5W009, Q96A26, Q6PJF8, Q9HA59, Q6ZWF9, Q3B7K0, Q6ZWI7, Q4QQJ5, Q68DZ4, O43533, A2RRL5, Q6ZNJ0, Q658J9, Q9BTT6, O95234, A2RU06, Q59F90, P10646, Q2PEF9, A2RU77, Q9P171, Q45XF9, O43417, Q29RW3, A1A525, Q9H9P9, Q05CA1, Q3ZK31, Q9H7X5, Q59FW2, Q14F51, Q9BRT6, Q8IYL2, Q08AN2, Q53EY2, O95567, Q49AT6, Q9H7W3, Q9HD52, P81277, A1A4F2, Q59H12, Q96N11, O43408, Q9P1C4, Q108M9, Q59EU1, P13640, Q9BUY7, A1YRJ5, Q59FN6, Q6P2M3, O95873, Q4G1C6, Q8NDY0, Q16401, Q9NYS9, Q96D53, Q5JPD9, Q08AF4, Q6ZSM9, Q3SYH6, A1L4K9, Q5DSZ6, Q6ZTY7, Q8NC66, Q3B861, Q9H5F7, Q49AH6, Q9P160, Q49AG1, Q6P525, P60568, Q59FB4, A2RRQ4, A1L473, Q495Y0, Q53G36, A2RRF5, Q6GU34, Q3KZ25, Q5CZI1, Q8WWA1, A2RUC3, Q6IPL3, Q8N1K6, A1L4P6, Q9HA97, P46778, Q0VA89, Q6ZP65, P29622, Q8N2D7, O94876, O14892, Q53EV8, Q6ZUS5, Q6UXU6, Q9H282, O95262, Q5CZ68, O15479, Q402F7, Q9NYJ6, O75121, O75679, O14883, A2VCT9, Q53FE2, Q2M1H9, Q6ZT74, Q9P1E6, Q13058, Q5D079, A1E4E7, Q0P5W4, Q7Z3Z5, Q86XU6, Q2T9H3, Q6TV06, Q12757, Q2KHM8, Q1RMZ5, Q86XL3, Q6PIW0, A1A527, Q547V4, Q4VBL6, Q9P1P1, Q2TB22, Q14D51, Q6IAI7, Q53HV3, A2RRF3, O95616, Q9UHV1, A1L4H0, A0PJD2, Q8WTU5, Q8IVE0, Q5JVG2, Q7Z3A0, Q6P9E1, O75151, Q9H627, A1L4G3, Q9UL09, O76042, A0AV52, Q53H64, Q3SX54, Q9P1J6, Q9Y2W6, Q9BSG2, Q24K25, O75170, O75062, Q4KMX1, A1A4W3, Q2M2I5, Q9GZS3, Q6PJ28, Q2KHM5, Q3KT79, A2VDI9, Q69YW4, Q4F964, O75061, Q99777, Q9NXW5, A2RTY4, Q8TBA2, Q701L6, Q3SY90, Q2Y122, Q9P1L5, O14605, A0AR27, Q0P6H7, A2N4P8, O60811, Q9H8N8, Q9HBL6, Q5D221, Q3LFQ0, Q6UX54, Q5W9G7, A2NYV5, A0JP21, Q6GX22, Q96GF1, Q8N357, Q6PRD7, Q8N9Z8, Q9P1D0, Q6NUK0, Q08EI2, Q8N9R1, A1L4K6, Q59H20, Q9UBM8, Q69YR9, Q8N5B6, Q494X1, Q9H2N8, O95558, A1L431, Q2M273, Q9NXV8, A1L381, Q9NQ89, Q53EY9, Q20WK0, O43159, A0JNW5, Q2TAB0, Q8IZ21, Q9P1E7, Q9H8W2, Q9UHU9, Q659F9, Q495S3, A0PJ50, Q4G0Q1, Q69G40, P07998, Q2PW48, Q9P139, Q8WWI3, Q6TAR1, A0N1S0, Q8TBJ7, Q496L7, Q9H606, Q147U4, Q70LR7, Q9H9U3, Q59FL0, Q9NVK6, Q53SF7, Q3C1X3, A0JLT8, A1L4L3, A2RRL8, Q6ZP15, P42696, Q6NXR0, Q9H377, Q14CE6, O14612, A0MNP5, Q5VUZ2, Q63Z38, O00417, Q56VN4, Q2M1U8, Q13871, Q8TCE9, O43514, Q96MT5, Q96QK8, Q9P1J0, Q4V755, Q53F81, Q15531, Q7Z5S1, Q05DB9, Q8TDA3, Q16457, A0N5G4, A0AV42, Q9BWB9, A2RTY8, Q5TDS4, O75838, Q8NBS4, Q9HCJ3, A4FTX2, Q6P2P0, O95678, Q9H881, Q2M257, Q9HAC2, O95868, Q67FW5, Q86XG4, Q6AZ91, Q05CV5, O75112, Q92667, Q9H6D3,

Q8WVC6, A2RUE5, O60448, Q6NV74, A1A4D3, Q284T0, O75785, O95473,  
Q6PJI9, Q7Z5J4, A1L4F5, Q5J875, Q9NXS3, Q0D2I6, Q9H7C9, Q0VA92, O43531,  
Q9BYH1, Q9Y4C8, Q9H6K0, Q9Y3X0, A2VCL5, Q6IA00, Q9HCF8, Q6ZUA4,  
Q9BXU3, A0PJ74, Q9NTU6, Q05CF9, Q05KQ8, A2RRA5, Q7L665, Q4G196,  
Q8WW65, O95410, Q8WXQ4, Q5TGP6, Q9NW77, Q9GZY1, Q96HP0, Q08AL8,  
Q9Y4M8, Q9UHU7, Q96NS8, Q6ZT78, O95276, Q9UH64, A2NVQ0, A0JLU2,  
Q9H879, O00437, Q2M1Z1, Q1ZYL8, A2RRH1, Q9H3B8, Q6V1P8, P29377,  
Q7LBY6, Q9BU82, P49223, Q29863, Q8IZ25, Q9GZQ9, A1L417, Q3MIY3, Q15426,  
Q05B42, Q9UI90, Q68CY0, O15026, Q52LY3, Q9P1D2, Q9H2R7, Q70LR4, Q9UJ71,  
Q05DQ4, Q9HAA7, Q9P1K0, Q9NUV3, Q8WWF5, Q86TA1, O60269, A2NVQ1,  
A1Z2M2, Q7Z2T0, Q9NXK6, Q5XKG8, Q6NXP5, A0N5V3, Q9H9A6, Q38IJ5,  
Q05BV5, Q9P1F5, Q0QD47, Q5PXE8, Q6UY11, Q8TF58, Q5U000, Q9H629,  
Q9BVW6, A0MSJ5, Q9HA85, A2RUK1, Q9UEL2, Q68CQ1, A1A583, Q9H5X8,  
Q96RP4, O14603, A0AVI6, Q9H7M1, Q96HH6, A1A513, O94987, Q1ZYL4,  
A1L3A9, A1L306, O00617, Q9UGP3, Q9NZ54, O15544, Q68DG7, O95173,  
Q9P0F3, Q0P618, A2VDJ2, P35612, Q6IA31, Q5JV87, Q9BTP6, Q6MZN3,  
Q9NT86, O75677, Q9BRP9, P07498, Q9H5F0, Q13528, Q0VFW7, A1L4G7, P35637,  
Q9BY99, Q9Y4U2, Q6MZJ2, Q9H5I0, A0JP11, Q9NZY7, Q15909, Q86Z03,  
Q9BY60, Q9NUI9, O00321, O95317, O43848, Q5Y191, Q9H8Q6, O00446,  
Q8WV14, A1L485, A1L4F2, Q5GMH6, Q580R0, Q13278, Q68CR4, P78512,  
Q03715, Q17RM7, Q9UI59, A2VCM6, P42025, Q18P99, A2J1N8, Q9H9G2,  
Q5U5Z3, A2RRG4, A2RRN8, Q9NX31, A0PJF9, Q6AZW6, Q8N0W5, Q9P1N2,  
A1L4L0, Q9H3B4, Q8N3U5, Q7L4P6, Q53GE8, Q13209, Q8WV30, Q9UMB4,  
A1L401, Q96BY7, Q86YB4, Q6PJ05, O94800, A1L457, Q8NA09, O94886, O43695,  
O94880, A0A4R5, Q9UJ78, Q8N4H0, Q6MZW2, Q05CG6, Q7Z402, Q6P2H8,  
Q14553, Q6GMR0, Q9UI85, A2RUE0, Q86SY2, Q8NCS9, Q9H7F6, A0PJA7,  
Q9NZK9, Q0PNE2, Q24JT5, A1L307, Q5VY75, Q9UPR6, Q96B23, Q9BY25,  
A0JLS0, Q8WU59, Q9BYA9, Q9H8S5, O75560, A1Z2L5, P33763, Q009A7, O43909,  
A1A4D9, Q8IWB4, Q9BWJ2, Q68DB0, Q96IZ2, Q24JQ7, Q8N2E5, Q96MM2,  
Q68CK3, A2V838, Q9H758, Q9BU64, A4FTV9, Q96BN6, Q9BUN5, Q5JPF0,  
Q96DI0, Q96CN9, A1A4E0, Q86VC2, Q659G2, Q96GX1, Q5Q0U2, Q9HBS7,  
Q6ISU1, A2RRE7, Q8NB23, Q0D2H3, Q6FGS2, A0SEH4, O15277, O94889,  
A0PJI2, O94975, Q8N2T0, Q8N683, Q59GC8, Q69BL6, Q6ZTE4, Q59ED6,  
Q7Z3E5, Q9H6Z8, Q6ZVS6, Q9UFV3, Q63ZY4, Q05CU0, A2RUN4, Q6IC03,  
Q5U0Q9, Q8IV01, Q9P2N6, Q69YX3, Q4LE77, A2RU30, O94964, Q6ZMY0,  
Q53F74, Q6ZSD8, Q1M0P3, Q59H72, Q9BVV8, A0AUX0, A1L3V4, Q149M6,  
O15480, Q53HN3, A1L475, Q3B7I0, Q6NT65, P53990, Q65ZQ3, A0PJJ7, O60643,  
A2RRB8, Q49A50, Q3SXR2, Q05DG5, Q2TU81, Q0QD40, Q38Q88, Q99944,  
Q6ZRB4, Q52LZ5, Q1HE27, O75406, Q9NV44, Q9P1J7, Q9UI52, Q86VX6,  
Q9NXE8, Q6ZRE9, A1L484, Q6IFQ2, Q8TCK8, Q9NRJ1, O00381, O14545,

Q6PKH9, Q6P2R4, Q17RH5, Q9UMX8, Q8WYV9, Q9NZW6, Q52LS7, A2RUA0, Q95712, Q2PAD7, Q9NWP0, Q548M6, Q59GK7, Q9C0E4, Q9BVQ7, Q3KP44, Q08ET8, Q4VTT3, Q4KMX7, A1L4C5, Q2HXV1, O15206, Q24JS4, Q8IU63, A0PJU8, Q9P1G9, Q6YJI3, Q86XV1, Q9P166, Q96HU6, Q4G0Y8, Q6ZMK1, Q5CZ82, Q969N5, Q6NSX4, Q2TAM4, Q9C091, A1L421, Q566Q2, P51825, A0AVD7, Q4G0V0, Q9HAF0, A0AVP6, Q52LK8, Q05DR2, Q8N442, Q6NTC9, Q96AJ1, Q2TAC2, Q29RX7, O00247, Q0VAG7, A2RUI4, A2BDD9, Q4G134, Q9H745, O75154, A2RRP8, O00547, Q59FT8, Q4G0W6, Q32MQ2, Q68CV8, Q9NYQ2, Q96KF7, Q9P1G2, Q71RF5, Q53FH5, O14790, Q9NV39, Q53YU7, Q2TB00, A1L4F9, A0PJV4, Q6NUI8, Q8ND07, Q9NXP9, Q3SXM9, A1KY36, A0FDN6, A2RRQ9, Q5T3I0, Q8N743, Q9NXI6, O76070, Q9NW61, Q8N7K3, P02545, A0PJF8, Q7L876, Q7Z5E7, Q6ZUY1, Q8NHK4, Q0VGM6, Q9BYH2, Q6NWP4, A1L4K2, O95641, A2RUN2, O60676, Q86X67, Q6ZNP9, A1L0U9, Q6NYC6, Q9GZZ7, Q53Y35, Q9H349, Q2TB81, A0AVS9, Q6ZT30, Q5BKU6, Q8NE34, Q53G47, Q9HAJ0, Q9P136, Q8IW56, Q96AN5, Q32UJ0, Q13425, Q9UI57, Q13410, Q68DI8, O77966, A0A4Z1, A1L3Y2, Q495V8, Q08EJ9, A1A510, Q8IWY9, P49646, O43237, Q14147, A0PJI9, Q9H800, Q6I9X7, Q4KN04, Q5H9N7, Q6ZTI2, P05184, A1A4Z4, A0T4C8, Q14422, Q6ZWF5, Q8NAM4, Q6XYC3, Q6PEY9, Q9UHU2, Q6PJF4, Q0P5R3, Q6P526, Q32LY1, A2RTZ9, Q5ICN7, Q8NE73, Q14C73, Q9BYA0, Q3B7T3, Q96GL9, Q32M35, Q8WTV1, Q05524, Q53Y57, Q8WTW9, Q17RQ6, Q3SX80, Q0VAD3, Q9P267, Q14D68, Q14543, Q8TE67, A3KMG0, Q53HE0, Q9UI72, Q8N755, Q4VAM4, A1L447, Q12899, Q5W199, Q6I9Q8, O75071, Q59GS4, Q2KHR3, O43467, Q5R371, Q9H5P4, Q1ZYL9, P36980, Q53F65, Q6ZNY5, Q9Y4N5, Q9BV19, A2RRE5, Q6IFM3, Q6VAK5, Q8TCK0, Q9H051, P27635, O14792, Q17RE6, Q8N8T3, Q05BP9, Q53XZ8, A1A5C4, Q9Y442, Q05CF5, Q9HA94, O97985, Q9HAH7, Q6P1Q3, Q5PRF9, Q3ZCM5, Q0VDA5, Q5HYG9, Q9P1F8, Q96BK8, Q9H926, Q8N4I4, O15061, A2NHL8, Q96FK3, Q86XC4, Q3SYA6, Q76N27, Q8WVC1, O14669, A1A574, O95327, Q4KN31, Q8NHP6, P26373, Q9BV23, Q9H721, Q05BT0, Q9UJK0, A2RU67, Q53GJ9, A0AUK4, Q2TAK4, Q53GB1, Q8N9I4, A1A4V2, Q96RM9, Q9H8K0, Q8N2L6, Q9UN01

-- 2 of 2799--

GOID GO:0032501

TERM multicellular organismal process

P-VALUE 2.67275771556409e-54

CORRECTED P-VALUE 7.48104884586389e-51

NUM\_ANNOTATIONS 839 (of 4721)

ANNOTATED\_GENES P50391, P57679, O15130, Q9Y6N9, Q01534, O95631, P01258, P20849, Q00577, Q13105, O14829, P32302, Q9NYW3, Q9NPF7, P30872,

Q0VDD7, Q9HBY0, P13489, O43186, Q96J94, P23975, P98161, Q9NPA1, Q13449, P21980, Q16568, P10745, Q9Y576, Q99581, P43007, O15150, P00748, O43897, P51172, O15399, Q06520, P31213, Q9H255, O60258, P22105, Q16620, P32238, P25942, P30989, P03952, Q04844, Q6W4X9, Q9NR12, Q12950, P12821, Q68DL5, Q13214, P20809, Q99742, P40879, Q9NYV7, O75787, Q9C019, Q02548, Q05066, P11488, P21359, O60755, P98088, Q08828, O43898, P78504, O75916, P37058, P41180, O15522, Q13467, Q14203, Q9UI40, Q17R60, P01374, Q86W47, Q99958, P51178, P29762, P43320, O95980, P47881, Q9Y5M6, Q9HCN6, Q9UL68, Q9UBT3, P50553, P28476, P43080, Q15150, O43789, Q14DW8, O75326, A1A4U0, P49116, Q92988, O95390, P54762, P49286, P01135, O95861, P17181, P02452, Q68CQ4, O95754, Q9H2A3, O94788, P35913, P05160, Q9UKL2, P42261, P19087, Q08174, Q68CZ1, P23942, Q9Y6H8, O00526, Q01955, P62736, P25098, O75093, Q13224, P31645, O00358, Q13972, O75445, P25189, O43612, Q9NYV9, P31025, P51512, O75106, P16615, P28356, Q9P2T0, P02489, Q9NP08, Q13753, O95500, Q13956, O00238, O95076, P22748, Q15618, Q92563, Q13255, Q01726, P47928, Q9UQ52, P02748, Q99928, P00439, P56373, P57058, Q14004, Q9H2H0, P10070, P31267, P41145, P01286, P47900, P06727, P19099, Q04721, P54259, Q9H488, Q8TC59, P35348, Q13705, P47872, P08151, Q9NYW0, O15540, Q8IYT8, P51826, O43347, O00555, P98177, P55285, Q16254, Q9UBU2, O14830, Q12879, P55895, P28221, Q9NWH7, Q13402, Q96RI0, O60220, O15547, P62263, P98153, P62988, P11487, P08620, O14994, O75094, O14815, O60262, P32245, Q99626, Q05086, Q16566, P37288, Q07687, P26927, Q9GZZ6, Q92786, Q14142, O94887, Q14602, O43316, O14511, P78562, Q9BXM0, P09758, O00203, O60481, P01730, Q9NRC9, Q9NYV8, Q9BZS1, Q15835, P12271, Q14641, P15291, Q9GZY0, A1L0T6, P53805, Q8NFI1, Q13285, P30988, P25054, O60939, P00797, P43005, O60542, Q9Y5L5, P10767, P10071, P50222, P35372, Q14202, P41146, O15415, P52564, O43193, P14921, P34969, Q9Y463, P28223, P19235, P10828, Q15613, O60500, P17542, Q15784, Q14507, P21781, Q13939, O95264, Q3SYG4, Q14565, P56179, O95237, Q03181, O76002, Q16671, Q92903, Q9Y5Y9, O00192, O96001, Q13950, Q01538, O43435, P41586, Q9UHC6, Q9UJU5, O00253, Q12849, P04085, P84022, O14727, Q02763, Q02410, O43184, Q08289, P40425, P00790, P01130, P17661, O14581, Q13520, O60938, P49640, Q13485, P14416, P51170, O95202, Q15761, P61296, P13631, Q12791, Q9HBE4, P22891, O60235, Q9NRE2, P17787, Q15777, Q15303, P10082, Q03052, Q13461, Q8NFI4, O95863, O60229, Q12824, P41235, P18428, O43365, Q08188, Q9UHL0, Q12951, O15198, P25103, P47887, Q9UGM1, Q15247, P16471, P42127, P08519, Q04912, O95759, P47989, Q9UJ96, P41594, P61106, Q9Y691, Q92838, P47874, P47871, O15537, P29973, P01009, P52803, Q07955, P02753, P31249, Q9BXJ7, Q8N196, P34820, P26441, O43636, O60344, P57082, P17482, P52701, P14770, P05111, P78363, P11473, O14813, Q13635, Q15825, Q13370, O43613, Q9NQ87, P61968, Q12840, Q99801, O43711, P08034, P37088, P56693,

Q14738, P47902, P62942, P12104, P47211, P51679, Q9H2C1, Q14831, Q9GZU5, O75360, P22612, Q6NT51, P56178, O60721, Q13886, O15492, P55347, P17405, Q14576, P30874, O00634, Q12952, P30968, P04628, P25100, O75593, P35368, P14091, P35527, O00254, O00425, Q5VVI0, P35556, Q96PF2, O43248, Q16478, Q99835, Q9UBC0, Q00975, O60266, P42898, P22888, Q02962, Q06710, O95475, P53667, P09544, O15266, Q14416, Q14469, O15353, Q04864, O75427, O95918, Q16635, P02818, O43614, O14773, P07316, Q15465, Q05329, P09172, Q9UHD0, P22607, P17509, P15923, P43681, P31270, P08700, P13497, Q8WZ75, O95948, Q04741, Q99453, P01588, P05813, Q12837, P15313, O75581, Q02080, P08100, Q03395, P51160, P47804, P36575, O60663, P01225, O60921, P21728, P03999, P33765, O14804, P48742, P06401, O14788, P61812, P78540, Q59GJ8, P02649, Q9Y3N9, P20800, P23946, P14651, A0PK02, Q05586, P15289, O14753, Q00653, P24043, O95365, P22466, Q9BQ70, O15146, P60953, P51843, P28845, Q9UK32, Q16281, O95450, P28358, Q9BRP0, P06744, Q9NYW1, Q8IXF0, P56703, P16499, P08912, Q86VD1, P26436, P47890, O15178, P21246, Q15768, P54760, P19622, O95947, Q9P2R6, Q09470, Q9UKW6, P58182, Q6UWB1, O95185, O75508, P14138, Q06430, P16150, P55073, Q5T4F7, Q9HAV5, P05177, Q99963, P40197, Q14993, O60447, Q3ZCU4, Q16518, Q13607, Q9HB89, Q02577, O76099, P11831, Q01064, Q14318, P01127, Q06587, P49638, P09471, P16520, Q15329, P35243, P52594, Q93098, P49335, Q16558, O95025, Q9UHF3, O15259, Q96R84, P36896, O00482, P07359, O95834, P51841, P56696, P18075, Q9Y277, O60890, Q02505, P27037, P40205, Q53GA4, O95238, P20908, P50052, P31273, P22003, Q12816, Q99440, Q13862, P41743, O76093, P15863, P13688, Q15762, Q13884, Q9H306, Q9NYW6, P30048, O75366, Q03431, O14786, P55107, P54252, Q13795, P17677, A1A5C6, Q13117, Q9H3D4, P60660, Q9UH65, Q14093, Q13103, Q13606, P35680, O00445, O95259, Q15319, O95222, Q15306, Q13515, P09017, P46098, O15079, P09067, O75382, P05549, P23582, Q93097, Q8WWQ8, P10827, P15248, Q8TDN2, P18545, Q9HAB4, Q9UGP4, P30939, Q9Y585, P16989, P36897, P41970, Q9NZM1, Q9NZW4, P21815, O00294, O75161, Q03721, P43220, Q14500, P53674, Q9Y2K3, P30301, P28908, Q14623, Q14990, P10747, P47901, P08172, O00222, P41181, P28370, P35227, P26998, P30542, P52945, Q9UGF7, Q99750, Q12870, P82279, O15085, P35663, P53708, P05067, Q3SYC2, P10588, Q13003, P78367, P17900, O14514, P98172, O95813, Q9Y698, Q9GZV9, P56706, P50406, Q05901, Q16650, O15457, P25391, O95477, P33681, P12645, P48431, P26374, Q02446, Q14012, O14490, O75083, O75829, P49454, P21452, O60248, Q9UBR4, O60931, P13569, O15202, Q9Y2Y8, P58173, Q9Y3Q4, O43526, O43749, O60609, P23759, P49815, Q86YL7, Q9Y5E3, O15156, P23760, O00755, O14926, O00590, O60462, Q05952, P50148, Q02297, O00115, P05106, Q07603, P06213, P78424, Q07352, P39086, P23415, Q14190, P28222, Q13835, P35548, P23945, O60404, Q9Y261, O75311, P13942, Q9H161, Q5FVE4, Q9Y3Y4, Q15628, O60882, Q13507, P09016, P21918,

P32856, Q13474, P23769, P10276, O95231, P01298, Q13002, Q14532, P15056, P12757, Q04724, O60403, Q16099, Q9NRE1, O96004, P43146, P06340, P24347, O76050, P35221, O43603, Q13769, O60902, O00468, O95183, O60840, Q9HC10, Q01196, Q9H9P2, P05556, P08842, Q14055, Q12955, Q13653, O43555, O00295, O00230, Q16820, Q9Y5H9, Q14863, A1E959, P53673, O75553, P32297, P16234, P34982, Q92481, Q02643, Q14183, Q9UBY8, P48058, P35240, P08588, Q99218, P09603, P47870, P03951, P54845, O15420, Q9H694, P28335, O95416, O60725, Q9H7Z6, Q9P212, Q15078, O75762, Q9Y6L7, Q9BXA7, O00587, Q06945, O14531, P46109, P31644, Q5T230, Q15878, P20941, O75603, P26992, P50135, Q9UMR5, Q9NQN1, Q9H295, P54257, P28566, O75920, P57727, Q02575, Q15116, P41143, Q9UKL4, P07320, Q9P1A6, O15296, P32247, P15382, P22301, O00144, O43318, Q14032, Q02846, Q07075, O43763, Q14573, O75364

-- 3 of 2799--

GOID GO:0007267

TERM cell-cell signaling

P-VALUE 4.67117857484802e-38

CORRECTED P-VALUE 1.30746288309996e-34

NUM\_ANNOTATIONS 208 (of 758)

ANNOTATED\_GENES P78562, Q9BXM0, P01563, O15130, O43699, P46098, O15079, P32971, Q14416, P09544, P30872, Q12913, Q14641, P23975, P12872, Q9HAB4, Q9NPA1, P30939, O43614, Q13285, O43921, Q15465, P18509, O60939, P43005, Q16568, Q05329, P43220, Q03721, P09172, P80098, Q14623, P43007, Q99988, P43681, O00222, P31270, P10767, P08700, P30542, P52945, P31213, O60258, P30989, P82279, Q04844, P34969, P28223, Q13214, P41273, Q13003, O95264, Q9NR48, P20809, P98172, Q9Y698, P56706, P21728, O75896, P50406, Q03181, Q05901, O14804, P40933, P06401, P61812, P21359, P47992, P12645, P33681, O60755, P02649, Q9UHC6, P35225, P04085, Q05586, O14490, Q02763, Q02410, P24043, P22466, Q16552, P01374, O15146, Q86W47, O95297, P14416, Q15761, O43526, P28476, Q12791, P56703, P17787, Q14DW8, P08912, Q9Y5E3, P10082, O00755, P49286, Q03052, P15514, Q15768, P50148, Q09470, P28222, P23415, P39086, P32745, O75508, O95754, O75311, P14138, P42261, Q08174, P21918, Q9Y6H8, Q9NPH9, Q13002, P42830, P42127, Q13588, Q16099, Q13224, P31645, Q13972, P01567, Q9HB89, P41594, O43612, P25189, O00175, O43603, P61106, Q9Y691, P47874, O00468, P52803, P02753, P01222, P00709, O60344, Q13255, P05111, O00233, Q99928, O00230, P00439, Q93098, P56373, Q15825, Q16558, O43613, Q13370, Q12840, P41145, P32297, P01286, O95389, P08034, Q9HC96, Q02643, Q9Y277, Q14183, Q9UBY8, P48058, P35348, Q9H2C1, Q14831, P08151, P41587, P47870, O76093, O00555, P28335, Q12879, Q14512, P30874, O14786, P28221, P08949, P54252, P25100, P62988, Q15878, P11487, P08620,

P35368, P55196, O14994, P32245, P54257, P48023, P28566, Q9UKL4, O43248, Q9P1A6, Q16566, Q8NCG5, Q16478, P22301, Q9GZZ6, Q99835, O00445, O15467, Q00975, Q07075, Q5T442, P32970

-- 4 of 2799--

GOID GO:0003008

TERM system process

P-VALUE 4.487001532428e-28

CORRECTED P-VALUE 1.2559117289266e-24

NUM\_ANNOTATIONS 333 (of 1701)

ANNOTATED\_GENES O60266, P50391, P42898, O15130, Q02962, Q9Y6N9, O95475, Q14416, P09544, O14829, Q9NYW3, O95918, O43186, P23975, Q16635, Q9NPA1, O43614, O14773, Q16568, Q05329, P10745, P09172, P22607, P43007, P43681, P51172, O15399, Q9H255, P30989, P01588, Q12837, Q04844, P05813, Q6W4X9, P15313, P12821, P08100, Q03395, P51160, P36575, P47804, P40879, Q9NYV7, P21728, P03999, O75787, P33765, O14804, P11488, P61812, P21359, P78540, O60755, P02649, Q9Y3N9, P20800, Q05586, Q08828, O75916, Q9UI40, P24043, P22466, Q17R60, P01374, O15146, Q86W47, Q16281, P43320, P47881, Q9Y5M6, P28358, P28476, P43080, Q9NYW1, O43789, P16499, P08912, P47890, P49286, P21246, Q09470, P02452, P58182, O75508, P14138, P35913, Q9UKL2, P42261, P19087, Q5T4F7, P23942, Q9Y6H8, Q01955, P62736, P25098, Q13224, P31645, Q13972, Q13607, Q16518, Q9HB89, O75445, P25189, O43612, Q9NYV9, O76099, P31025, O75106, P02489, P11831, Q01064, O95500, Q13956, P09471, P22748, P16520, Q15618, Q13255, P35243, Q99928, P00439, P56373, P49335, Q16558, O15259, P41145, Q96R84, P19099, P51841, O95834, P56696, Q9Y277, Q02505, P35348, P47872, P50052, Q9NYW0, Q13884, O00555, Q9NYW6, Q16254, O14830, Q12879, P28221, Q13402, P54252, O60220, O15547, P62988, O14994, P60660, Q13606, Q16566, P37288, Q9GZZ6, Q15319, O00445, O95222, Q14602, Q9BXM0, Q13515, P09758, P46098, O15079, Q9NRC9, P23582, Q9NYV8, P12271, Q15835, P10827, Q8TDN2, P18545, Q9HAB4, Q8NFMU1, P53805, P30939, Q9Y585, Q9NZM1, Q9NZW4, P00797, O60939, P43005, O00294, Q03721, P43220, Q14500, P53674, Q9Y2K3, P30301, P47901, P08172, O00222, P41181, P50222, P26998, P35372, Q9UGF7, Q12870, P41146, P82279, O15085, P52564, P34969, P28223, P10828, P53708, P05067, Q3SYC2, O60500, Q15613, P10588, Q15784, Q13003, O95264, P17900, Q9Y698, P50406, Q3SYG4, O95237, Q03181, Q05901, O76002, Q92903, Q9Y5Y9, P26374, P48431, Q9UHC6, Q02446, O14490, Q02410, O75083, P21452, P01130, P17661, O14581, Q13520, O60931, O60938, P14416, P51170, P13569, P58173, Q9Y3Q4, Q15761, O43526, O43749, Q12791, P17787, Q9Y5E3, P23760, O00755, O14926, Q03052, P50148, P78424, P39086, P23415, P28222, O60404, O75311, P13942, Q13507, P47887, P21918, Q9UGM1, Q13002, O60403,

Q16099, P08519, O95759, P41594, Q9UJ96, P61106, O43603, Q9Y691, P47874, P47871, O15537, P29973, O00468, Q07955, O60840, Q9HC10, P02753, Q9BXJ7, Q8N196, O43636, P11473, P78363, O00295, O00230, Q15825, O43613, P53673, Q12840, P32297, O43711, P37088, P56693, P34982, Q14183, Q9UBY8, P48058, P35240, P08588, Q14831, Q9GZU5, P47870, P54845, O60721, O15492, P28335, O75762, Q9P212, P25100, Q15878, P31644, P20941, P35368, Q9NQN1, P54257, P28566, P57727, Q9UKL4, P07320, Q9P1A6, Q16478, P32247, P15382, O00144, Q02846, Q00975, Q14573

-- 5 of 2799--

GOID GO:0007275

TERM multicellular organismal development

P-VALUE 1.01179788460238e-27

CORRECTED P-VALUE 2.83202227900206e-24

NUM\_ANNOTATIONS 540 (of 3206)

ANNOTATED\_GENES P57679, Q01534, O95631, P01258, P20849, Q00577, Q13105, P32302, Q0VDD7, Q9HBY0, P13489, O43186, Q96J94, P98161, Q13449, P21980, Q16568, Q9Y576, Q99581, O15150, O43897, P31213, O60258, Q16620, P32238, Q9NR12, Q12950, P12821, Q68DL5, Q13214, P20809, Q99742, Q9C019, Q02548, Q05066, P21359, O43898, P78504, P37058, P41180, O15522, Q13467, Q14203, P01374, Q99958, P51178, P29762, O95980, Q9UL68, Q9UBT3, P50553, Q14DW8, O75326, A1A4U0, P49116, Q92988, O95390, P54762, P01135, O95861, P02452, Q68CQ4, O95754, Q9H2A3, O94788, Q08174, Q68CZ1, P23942, O00526, Q01955, P25098, O75093, Q13224, O00358, Q13972, O75445, P16615, P28356, Q9P2T0, Q9NP08, Q13753, O00238, O95076, Q92563, Q01726, P47928, Q9UQ52, P57058, Q14004, Q9H2H0, P10070, P31267, P01286, Q04721, P54259, Q9H488, Q8TC59, Q13705, P08151, O15540, Q8IYT8, P51826, O43347, O00555, P98177, P55285, Q16254, Q9UBU2, Q12879, P55895, Q9NWH7, Q13402, O60220, P62263, P98153, P62988, P11487, P08620, O75094, Q99626, Q05086, Q07687, Q92786, Q14142, O94887, O43316, O14511, P78562, Q9BXM0, O00203, O60481, P01730, Q9NRC9, Q14641, Q15835, P15291, Q9GZY0, A1L0T6, P53805, Q13285, P25054, P30988, P00797, O60542, Q9Y5L5, P10767, P10071, P50222, Q14202, O15415, P14921, Q9Y463, P19235, P10828, P17542, Q15784, P21781, Q13939, Q14565, P56179, Q03181, Q16671, O00192, O96001, Q13950, Q01538, O43435, P41586, Q9UJU5, Q12849, P04085, O14727, Q02763, Q02410, O43184, Q08289, P40425, Q13485, P14416, P49640, O95202, P61296, P13631, Q12791, Q9HBE4, Q9NRE2, P17787, Q15777, Q15303, Q03052, Q13461, Q8NFY4, O95863, O60229, Q12824, O43365, Q08188, Q9UHL0, Q12951, O15198, Q9UGM1, P16471, Q04912, Q92838, O15537, P52803, Q07955, P02753, P31249, Q9BXJ7, Q8N196, P34820, P26441, O60344, P57082, P17482, P52701, P05111, P11473, O14813, Q13635, Q13370,

Q9NQ87, P61968, Q99801, O43711, P08034, P56693, Q14738, P47902, P62942, P51679, Q9H2C1, O75360, P22612, Q6NT51, P56178, Q13886, P55347, P17405, Q14576, O00634, Q12952, P30968, P04628, P25100, O75593, P35368, P35527, Q5VVI0, P35556, Q96PF2, O43248, Q99835, Q9UBC0, P22888, Q02962, Q06710, O95475, P53667, P09544, O15266, Q14469, O15353, O75427, Q16635, P02818, P07316, O14773, Q15465, P22607, P17509, P15923, P31270, P08700, P13497, O95948, Q8WZ75, Q04741, Q99453, P01588, Q12837, P15313, O75581, Q02080, O60663, P01225, O60921, P21728, P48742, P06401, O14788, P61812, Q59GJ8, P02649, P14651, A0PK02, P15289, O14753, Q00653, P22466, O95365, P24043, Q9BQ70, O15146, P60953, P51843, P28845, Q9UK32, P28358, O95450, Q9BRP0, P56703, P26436, Q86VD1, O15178, P21246, Q15768, P19622, O95947, P54760, Q9P2R6, Q9UKW6, Q6UWB1, O95185, O75508, P14138, Q06430, P16150, Q5T4F7, Q9HAV5, P05177, Q99963, Q14993, O60447, Q3ZCU4, Q16518, Q02577, P11831, Q14318, Q06587, P49638, Q15329, P52594, Q93098, P49335, O95025, Q9UHF3, P36896, O00482, P18075, P56696, O60890, P27037, P40205, Q53GA4, P20908, P50052, O95238, P31273, Q12816, P22003, Q99440, P41743, O76093, P13688, P15863, P30048, O75366, Q03431, O14786, P55107, Q13795, P54252, P17677, A1A5C6, Q13117, Q9H3D4, P60660, Q9UH65, Q14093, Q13103, P35680, O95259, Q15319, Q15306, P09017, P09067, O75382, P05549, P23582, Q93097, P10827, Q8WWQ8, Q9HAB4, Q9UGP4, P36897, P16989, P41970, Q9NZW4, P21815, P30301, Q14623, P10747, Q14990, P08172, P28370, P35227, P52945, P30542, Q99750, Q12870, P35663, P53708, P10588, P78367, O14514, P98172, O95813, Q9Y698, Q9GZV9, P56706, Q16650, O15457, P25391, P12645, P33681, P48431, Q14012, O75829, P49454, O60248, Q9UBR4, O60931, P13569, O15202, Q9Y3Q4, O43526, O60609, P23759, Q86YL7, P49815, Q9Y5E3, O15156, P23760, O00755, O00590, O60462, Q05952, Q02297, O00115, P50148, Q07603, P06213, P78424, Q07352, Q14190, P39086, Q13835, P35548, Q9Y261, P23945, P13942, Q9H161, Q5FVE4, O60882, Q15628, Q9Y3Y4, P09016, Q13474, P32856, P23769, P10276, O95231, Q14532, P15056, Q04724, P12757, O96004, P43146, P24347, P06340, O76050, O43603, P35221, Q13769, O60902, O00468, O95183, Q01196, P05556, Q9H9P2, P08842, Q14055, Q12955, Q13653, O43555, Q9Y5H9, Q14863, A1E959, P32297, O75553, P16234, Q92481, Q02643, Q14183, P35240, Q9UBY8, Q99218, P09603, P54845, Q9H694, O15420, P28335, O95416, O60725, Q15078, Q9P212, Q9H7Z6, Q9Y6L7, Q9BXA7, O00587, O14531, P46109, Q06945, Q5T230, P26992, O75603, Q9UMR5, Q9H295, O75920, Q15116, Q02575, P07320, O15296, O00144, P22301, O43763, Q07075, O75364

-- 6 of 2799--

GOID GO:0048856

TERM anatomical structure development

P-VALUE 4.63366367021048e-27  
CORRECTED P-VALUE 1.29696246129191e-23  
NUM\_ANNOTATIONS 486 (of 2822)  
ANNOTATED\_GENES P57679, P22888, Q02962, Q01534, Q06710, Q12959,  
O95475, O95631, P53667, O15266, P09544, P20849, Q00577, Q14469, O15353,  
P32302, O75427, Q9HBY0, P13489, O43186, P98161, Q16635, Q13449, P21980,  
P02818, O14773, P07316, Q15465, Q16568, Q9Y576, Q99581, P22607, O15150,  
P17509, P15923, P31270, P08700, P13497, O43897, Q8WZ75, O95948, P31213,  
O60258, Q16620, P32238, Q99453, P01588, Q12837, Q9NR12, P15313, P12821,  
Q02080, Q68DL5, Q13214, Q6UXY1, O60663, P01225, P20809, Q99742, P21728,  
Q9C019, Q02548, P06401, P48742, O14788, Q9UQR0, P61812, P21359, P15311,  
Q59GJ8, P02649, P14651, A0PK02, O14753, P15289, O43898, Q00653, P78504,  
P37058, P41180, O15522, Q13467, Q14203, P24043, P22466, Q9BQ70, P01374,  
O15146, P60953, P51843, P28845, Q99958, P51178, Q9UK32, O95980, O95450,  
P28358, Q9UL68, Q9UK85, Q9BRP0, P50553, P56703, Q14DW8, O75326, A1A4U0,  
P49116, O95390, P54762, P21246, O15178, Q15768, P54760, O95947, P19622,  
P01135, O95861, P02452, Q9UKW6, Q6UWB1, O95754, O95185, O75508, Q9H2A3,  
P14138, O94788, P16150, Q5T4F7, Q9HAV5, Q08174, Q68CZ1, P05177, P23942,  
O00526, Q01955, Q99963, P25098, Q14993, O60312, O75093, Q13224, O00358,  
Q13972, Q3ZCU4, Q16518, O75445, Q02577, P16615, P11831, Q14318, Q13753,  
P01127, O00238, Q06587, O95076, Q92563, Q15329, Q01726, P47928, Q9UQ52,  
Q93098, P49335, P10070, Q9NP71, O95025, P31267, Q9UHF3, P01286, P36896,  
O00482, P07359, P56696, P18075, Q04721, O60890, P27037, P54259, Q9H488,  
Q13705, Q53GA4, P50052, P20908, P08151, P31273, Q99440, P22003, O15540,  
Q8IYT8, P41743, O76093, P15863, O43347, P13688, O00555, P98177, P55285,  
Q16254, P30048, Q12879, P55895, O75366, O14786, Q03431, Q13402, P55107,  
P54252, O60220, Q13795, P17677, O60383, P62263, P98153, P62988, P11487,  
P08620, O75094, P60660, Q9UH65, P12035, Q99626, Q13103, Q05086, Q07687,  
P35680, Q15319, O95259, Q92786, Q5JQC9, O94887, O43316, P78562, Q9BXM0,  
Q15306, P09017, O00203, P01730, O75382, P09067, Q9NRC9, P05549, P23582,  
Q93097, Q15835, Q8WWQ8, P10827, P15291, A1L0T6, Q9HAB4, P53805, P16989,  
P36897, Q13285, P41970, P25054, P30988, Q9NZW4, P00797, P21815, O60542,  
P30301, Q14623, P10747, P08172, P10767, P28370, P10071, P50222, P35227, P30542,  
P52945, Q12870, P82279, O15085, O15415, P14921, Q9Y463, P19235, P10828,  
P53708, P17542, P10588, A2NWD3, Q15784, P21781, P78367, P98172, O14514,  
O95813, Q9Y698, Q9GZV9, P56706, Q14565, P56179, Q03181, Q16671, Q16650,  
O96001, Q13950, O15457, Q01538, O43435, P25391, P33681, P12645, P48431,  
Q9UJU5, Q12849, Q14012, O14727, Q02763, Q02410, O75829, O43184, Q08289,  
P49454, P40425, O60248, O43439, Q9UBR4, O60931, Q13485, P14416, P49640,  
P13569, O15202, O43526, O75602, P61296, P13631, Q12791, Q9HBE4, O60609,

P23759, P49815, P17787, Q86YL7, Q15777, Q9Y5E3, O15156, Q15303, O00755, P23760, O60462, O14926, Q03052, Q13461, P50148, O00115, Q02297, Q07603, P06213, P78424, Q07352, Q8NFY4, O95863, O60229, Q12824, P39086, Q14190, Q08188, P35548, P23945, Q9Y261, P13942, P18206, Q9H161, O75333, Q12951, Q9Y3Y4, Q15628, O15198, O60882, P09016, O43312, P32856, Q13474, Q9UGM1, P23769, P10276, Q14532, P15056, Q04724, A0PJG1, Q9H3Q1, O96004, P43146, P06340, P47989, O76050, P35221, Q13769, Q92838, O60902, O00468, P52803, O95183, P02753, Q01196, P31249, Q9H9P2, Q8N196, P05556, P01222, P08842, P34820, Q14055, P26441, O60344, P57082, P17482, P52701, Q12955, P05111, P11473, Q13653, O14813, Q13635, Q9Y5H9, Q13370, Q14863, Q9NQ87, A1E959, P61968, O75553, P32297, Q99801, P08034, O43711, P16234, P56693, Q92481, Q02643, Q14738, P47902, Q14183, P62942, Q9UBY8, P35240, Q9H2C1, P51679, Q99218, P09603, O75360, P22612, P54845, Q6NT51, O15420, P56178, P55347, P28335, P17405, O95416, O60725, Q9H7Z6, Q9P212, Q14576, Q15078, O00634, P04628, Q06945, P46109, O14531, O75593, Q5T230, P35368, O75603, P26992, P04201, Q9UMR5, Q9H295, P35527, O75920, O00425, Q02575, Q5VVI0, P35556, O43248, P07320, O15296, P15382, P22301, O00144, Q99835, Q9UBC0, Q07075, O43763, O75364

-- 7 of 2799--

GOID GO:0048731

TERM system development

P-VALUE 7.72527360720293e-27

CORRECTED P-VALUE 2.1623040826561e-23

NUM\_ANNOTATIONS 441 (of 2497)

ANNOTATED\_GENES P57679, P22888, Q02962, Q01534, Q06710, O95475, O95631, P53667, O15266, P09544, P20849, Q00577, Q14469, O15353, P32302, O75427, Q9HBY0, P13489, O43186, P98161, Q16635, Q13449, P21980, P02818, O14773, P07316, Q15465, Q16568, Q9Y576, Q99581, P22607, O15150, P17509, P15923, P31270, P08700, P13497, O43897, Q8WZ75, O95948, P31213, O60258, Q16620, P32238, Q99453, P01588, Q12837, Q9NR12, P15313, P12821, Q02080, Q68DL5, Q13214, O60663, P01225, P20809, Q99742, P21728, Q9C019, Q02548, P06401, P48742, O14788, P61812, P21359, P02649, P14651, A0PK02, O14753, P15289, O43898, Q00653, P78504, P37058, P41180, O15522, Q14203, P24043, P22466, Q9BQ70, P01374, O15146, P60953, P51843, P28845, Q99958, P51178, Q9UK32, O95980, O95450, P28358, Q9UL68, Q9BRP0, P50553, P56703, Q14DW8, O75326, A1A4U0, P49116, O95390, P54762, P21246, O15178, Q15768, P54760, O95947, P19622, P01135, O95861, P02452, Q9UKW6, Q6UWB1, O95754, O95185, O75508, Q9H2A3, P14138, O94788, P16150, Q9HAV5, Q08174, Q68CZ1, P05177, P23942, Q01955, Q99963, P25098, Q14993, O75093, Q13224, O00358, Q13972,

Q3ZCU4, Q16518, O75445, Q02577, P16615, P11831, Q14318, Q13753, O00238, Q06587, O95076, Q92563, Q15329, Q01726, P47928, Q9UQ52, Q93098, P49335, P10070, O95025, P31267, P01286, P36896, P56696, P18075, Q04721, O60890, P27037, P54259, Q9H488, Q13705, Q53GA4, P50052, P20908, P08151, P31273, Q99440, P22003, O15540, Q8IYT8, P41743, O76093, P15863, O43347, P13688, O00555, P98177, P55285, Q16254, P30048, Q12879, P55895, O75366, O14786, Q03431, Q13402, P55107, P54252, O60220, P17677, P62263, P98153, P62988, P11487, P08620, O75094, P60660, Q9UH65, Q99626, Q13103, Q05086, Q07687, P35680, Q15319, O95259, Q92786, O94887, O43316, P78562, Q9BXM0, Q15306, P09017, O00203, P01730, O75382, P09067, Q9NRC9, P05549, P23582, Q15835, Q8WWQ8, P10827, P15291, A1L0T6, Q9HAB4, P53805, P16989, P36897, P41970, Q13285, P30988, Q9NZW4, P00797, P21815, O60542, P30301, Q14623, P10747, P08172, P10767, P28370, P10071, P50222, P35227, P30542, P52945, Q12870, O15415, P14921, Q9Y463, P19235, P10828, P53708, P17542, P10588, Q15784, P21781, P78367, P98172, O14514, Q9Y698, Q9GZV9, P56706, Q14565, P56179, Q03181, Q16650, O96001, Q13950, O15457, O43435, Q01538, P25391, P33681, P12645, P48431, Q9UJU5, Q14012, O14727, Q02763, Q02410, O75829, O43184, Q08289, P49454, O60248, Q9UBR4, O60931, Q13485, P14416, P49640, P13569, O15202, O43526, P61296, P13631, Q12791, Q9HBE4, O60609, P49815, P17787, Q86YL7, Q15777, Q9Y5E3, O15156, Q15303, P23760, O00755, O60462, Q03052, Q13461, P50148, Q02297, O00115, Q07603, P06213, P78424, Q07352, Q8NIFY4, O95863, O60229, P39086, Q14190, Q08188, P35548, P23945, Q9Y261, P13942, Q9H161, Q12951, Q9Y3Y4, Q15628, O15198, O60882, P09016, P32856, Q13474, Q9UGM1, P23769, P10276, Q14532, P15056, Q04724, O96004, P43146, P06340, O76050, P35221, Q13769, Q92838, O60902, O00468, P52803, O95183, P02753, Q01196, P31249, Q9H9P2, Q8N196, P05556, P08842, P34820, Q14055, P26441, O60344, P57082, P17482, P52701, Q12955, P11473, Q13653, P05111, O14813, Q13635, Q9Y5H9, Q13370, Q14863, Q9NQ87, A1E959, P61968, O75553, P32297, Q99801, P08034, O43711, P16234, P56693, Q92481, Q02643, Q14738, P47902, Q14183, P62942, Q9UBY8, P35240, Q9H2C1, P51679, Q99218, P09603, O75360, P22612, P54845, Q6NT51, O15420, P56178, P55347, P28335, P17405, O95416, O60725, Q9H7Z6, Q9P212, Q14576, Q15078, O00634, P04628, Q06945, P46109, O14531, O75593, Q5T230, P35368, O75603, P26992, Q9UMR5, Q9H295, P35527, O75920, Q02575, O43248, P07320, O15296, P22301, O00144, Q99835, Q9UBC0, Q07075, O43763, O75364

-- 8 of 2799--

GOID GO:0050877

TERM neurological system process

P-VALUE 1.44210266231089e-25

CORRECTED P-VALUE 4.03644535180817e-22  
NUM\_ANNOTATIONS 272 (of 1338)  
ANNOTATED\_GENES O60266, O15130, Q02962, Q9Y6N9, O95475, Q14416, P09544, O14829, Q9NYW3, O95918, O43186, P23975, Q9NPA1, O43614, O14773, Q16568, Q05329, P10745, P09172, P22607, P43007, P43681, P51172, O15399, Q9H255, P30989, Q12837, Q04844, P05813, P15313, P08100, Q03395, P51160, P47804, P36575, Q9NYV7, P21728, P03999, O14804, P11488, P21359, O60755, P02649, Q9Y3N9, Q05586, Q08828, O75916, Q9UI40, P24043, P01374, Q17R60, O15146, Q86W47, Q16281, P43320, P47881, Q9Y5M6, P28358, P28476, P43080, Q9NYW1, O43789, P16499, P08912, P47890, P49286, P21246, Q09470, P02452, P58182, O75508, P14138, P35913, Q9UKL2, P42261, P19087, Q5T4F7, P23942, Q9Y6H8, Q01955, Q13224, P31645, Q13972, Q13607, Q16518, Q9HB89, O75445, P25189, O43612, Q9NYV9, O76099, P31025, O75106, P02489, Q01064, O95500, Q13956, P22748, Q15618, Q13255, P35243, Q99928, P00439, P56373, P49335, Q16558, P41145, Q96R84, O95834, P51841, P56696, Q9Y277, P50052, Q9NYW0, O00555, Q9NYW6, O14830, Q12879, P28221, Q13402, P54252, O60220, P62988, O14994, Q13606, Q16566, Q9GZZ6, Q15319, O00445, O95222, Q13515, Q9BXM0, P09758, P46098, O15079, Q9NRC9, Q9NYV8, P12271, Q15835, Q8TDN2, P18545, Q9HAB4, Q8NFM1, P30939, Q9Y585, Q9NZW4, O60939, P43005, O00294, Q03721, P43220, P53674, P30301, O00222, P26998, P35372, Q9UGF7, Q12870, P41146, P82279, P34969, P28223, P10828, P53708, P05067, Q15613, P10588, Q15784, Q13003, O95264, P17900, Q9Y698, P50406, Q3SYG4, Q03181, O95237, Q05901, O76002, Q92903, Q9Y5Y9, P26374, P48431, Q9UHC6, O14490, Q02410, O75083, O14581, O60931, O60938, P14416, P51170, P58173, Q15761, O43526, O43749, Q12791, P17787, Q9Y5E3, P23760, O00755, O14926, Q03052, P50148, P78424, P39086, P23415, P28222, O60404, O75311, P13942, Q13507, P47887, P21918, Q9UGM1, Q13002, O60403, Q16099, P41594, P61106, O43603, Q9Y691, P47874, O15537, P29973, O00468, O60840, P02753, Q9HC10, Q8N196, O43636, P78363, O00295, O00230, Q15825, O43613, P53673, Q12840, P32297, O43711, P37088, P56693, P34982, Q14183, P48058, P35240, Q9UBY8, Q14831, Q9GZU5, P47870, P54845, O60721, O15492, P28335, O75762, P25100, Q15878, P31644, P20941, P35368, Q9NQN1, P54257, P28566, P57727, P07320, Q9UKL4, Q9P1A6, P15382, Q16478, O00144, Q02846, Q00975, Q14573

-- 9 of 2799--

GOID GO:0032502

TERM developmental process

P-VALUE 2.42501345382057e-24

CORRECTED P-VALUE 6.78761265724377e-21

NUM\_ANNOTATIONS 679 (of 4393)

ANNOTATED\_GENES Q9Y4I4, P57679, Q01534, O95631, P01258, P20849, Q00577, Q13105, P32302, O00198, Q0VDD7, Q9HBY0, P13489, O43186, Q96J94, P01574, P98161, Q13449, P21980, Q16568, Q9Y576, Q99581, O15150, O43897, P31213, O60258, Q16620, P32238, Q99445, P25942, Q9NR12, Q12950, P12821, Q68DL5, Q13214, P50453, Q6UXY1, P20809, Q99742, Q9C019, Q02548, Q05066, P21359, P98088, O43898, P78504, P37058, P41180, O15522, Q13467, Q14203, Q9BZZ5, P01374, Q99958, P51178, P25874, P29762, O95980, Q9UL68, Q9UBT3, P50553, Q14DW8, O75326, A1A4U0, P49116, Q92988, O95390, P54762, P01135, O95861, P02452, Q92772, P32745, Q68CQ4, O95754, Q9H2A3, O94788, Q8N163, P61247, Q08174, Q68CZ1, P23942, O00526, Q01955, P25098, O60312, O75093, Q13224, Q05513, O00358, Q13972, O75445, P16615, P28356, Q9P2T0, P02489, Q9NP08, Q13753, O00238, O15519, O95076, Q92563, Q01726, P47928, Q9UQ52, P02748, Q5UIP0, P57058, Q14004, Q9H2H0, P10070, P31267, P01286, Q04721, P54259, Q9H488, Q8TC59, P35348, Q13705, P08151, O15540, Q8IYT8, P21796, P51826, O43347, Q07011, O00555, P98177, P55285, Q16254, Q9UBU2, Q12879, P55895, Q9NWH7, Q13402, O60220, P62263, P98153, P62988, P11487, P08620, Q01094, O75094, P12035, Q99626, Q13077, Q9UPW8, Q05086, Q07687, Q92786, Q5JQC9, Q14142, O94887, O43316, O14511, P78562, Q9BXM0, P01563, Q13114, O00203, O60481, P32971, P01730, Q9NRC9, Q9NYL2, Q9H2X6, P27216, Q15835, Q14641, Q9UEE5, O43324, P15291, Q9GZY0, A1L0T6, P53805, Q13285, P30988, P25054, P24855, P00797, O60542, Q9Y5L5, Q9HCT0, Q9NWF9, P10767, P10071, P50222, Q14202, O15415, P14921, Q9Y463, P28223, P19235, P10828, P17542, Q15784, P21781, P41273, Q13939, Q3SYG4, Q14565, P56179, Q03181, Q16671, O00192, O96001, Q13950, Q01538, O43435, P41586, O60733, O95470, Q9UJU5, Q12849, P04085, P84022, O14727, Q02763, Q02410, O43184, Q08289, P40425, O43439, Q13609, O43866, P49640, Q13485, P14416, O95202, P61296, P13631, Q16342, Q12791, Q9HBE4, P78362, Q9NRE2, P17787, Q15777, Q15303, Q03052, Q13461, Q68HC0, Q8NFY4, O95863, Q6NUS6, O60229, Q12824, O43365, Q08188, Q9UHL0, P18206, Q12951, P55273, O15198, O43312, Q9UGM1, P16471, P02768, Q04912, A0PJG1, P47989, Q92838, O15537, P52803, Q07955, P02753, P31249, Q9BXJ7, Q8N196, P34820, P26441, O60344, P57082, P17482, P52701, P05111, P11473, O14813, Q13635, Q13370, Q9NQ87, P61968, Q99801, O43711, P08034, P56693, Q14738, P47902, P62942, Q9HAU6, P51679, Q9H2C1, O75360, Q6T1H8, P22612, Q6NT51, P56178, Q13886, P55347, P17405, Q14576, Q9Y5M1, O00634, P24385, P15531, Q12952, P30968, P04628, P25100, O75593, P35368, P35527, O00425, P63241, Q5VVI0, P35556, Q96PF2, O43248, Q9UHQ4, Q99835, Q9UBC0, P22888, Q02962, Q99584, Q06710, Q12959, O95475, P53667, P42771, P09544, O15266, Q14469, O15353, O75427, Q16635, P02818, P07316, O14773, Q15465, Q9UHD0, P22607, P17509, P15923, P31270, P08700, P13497, Q8WZ75, O95948, Q04741, Q99453, P01588, Q12837, P15313, O75581, Q02080, O60663, P01225,

O60921, P98170, P21728, O76036, P48742, P06401, Q9UQR0, O14788, P61812, Q14003, P15151, P15311, Q59GJ8, P02649, P14651, A0PK02, P15289, O14753, Q00653, P24043, P22466, O95365, Q16552, Q9BQ70, O15146, P60953, P51843, Q96PG8, P28845, Q9UK32, P28358, O95450, Q9UK85, Q9BRP0, P56703, O15304, Q86VD1, P26436, O15178, P21246, Q15768, P54760, P19622, O95947, Q9P2R6, Q9UKW6, Q6UWB1, Q13177, O95185, O75508, O15350, P14138, Q96IZ0, Q06430, P16150, Q5T4F7, Q9HAV5, P05177, Q99963, Q14993, O60447, Q3ZCU4, Q06455, Q16518, Q02577, P11831, Q01064, Q14318, P01127, Q06587, P49638, Q15329, P52594, Q93098, Q9H5I1, P49335, Q9NP71, O95025, Q9UHF3, P36896, O00482, Q9BXL6, P07359, P56696, P18075, O60890, P27037, P62753, P40205, Q53GA4, P20908, P50052, O95238, P31273, P22003, Q12816, Q99440, P41743, O76093, P13688, P15863, Q15762, Q00597, P30048, O75366, Q03431, O14786, Q9BX74, P55211, P55107, P54252, Q13795, P17677, O60383, A1A5C6, Q13117, Q9H3D4, P60660, Q9UH65, Q14093, Q13103, P35680, Q86YV9, O95259, Q15319, Q15306, P09017, O15524, P09067, O75382, P05549, P23582, Q93097, Q8WWQ8, P10827, Q9HAB4, Q9UGP4, P36897, P16989, P41970, Q9NZW4, P21815, P06748, P30301, P28908, Q9Y236, Q14623, P10747, Q14990, P08172, P28370, P35227, P22736, P30542, P52945, Q99750, Q12870, P82279, O15085, P35663, P53708, P05067, P10588, A2NWD3, P78367, O14514, P98172, O95813, Q9Y698, Q9GZV9, P56706, Q16650, O15457, P25391, P33681, P12645, P48431, Q13087, Q14012, O75829, P49454, Q9NS25, O75340, O60248, Q02779, Q02156, Q9UBR4, O60931, P13569, O15202, Q9Y3Q4, O75602, O43526, O60609, P23759, P49815, Q86YL7, Q9Y5E3, O15156, P23760, O00755, O14926, O00590, O60462, Q05952, Q02297, O00115, P50148, Q07603, P06213, Q969Z0, P78424, O00459, Q07352, P39086, Q14190, Q13835, P35548, Q9Y261, P23945, O14543, Q13188, P13942, Q9H161, Q5FVE4, O75333, O60882, Q15628, Q9Y3Y4, Q8IXM3, Q12981, P09016, Q13474, P32856, P23769, P10276, O95231, Q13002, Q14532, P15056, P12757, Q04724, Q9H3Q1, O96004, P43146, P24347, P06340, O76050, P35221, O43603, Q13769, O60902, O00468, O95183, Q01196, Q9H9P2, P05556, Q9UL32, P08842, P01222, P00709, Q14055, Q12955, Q13653, O43555, P62714, Q9Y5H9, Q14863, A1E959, O75553, P32297, P16234, Q9HC96, Q92481, O75414, Q02643, Q14183, P49810, Q9UBY8, P35240, Q13501, P08588, P01031, P54098, Q99218, P09603, P54845, P50570, O15420, Q9H694, P28335, O95416, O60725, Q15078, Q9P212, Q9H7Z6, Q9Y6L7, Q9BXA7, O00587, O14531, P46109, Q06945, Q00005, Q5T230, Q6UY14, O75603, P26992, P04201, Q9UMR5, Q9H295, O75920, Q15116, Q02575, P07320, O15296, P15382, O00144, P22301, O43763, Q07075, P32970, O75364

-- 10 of 2799--

GOID GO:0019935

TERM cyclic-nucleotide-mediated signaling

P-VALUE 2.98356341994757e-23  
CORRECTED P-VALUE 8.35099401243326e-20  
NUM\_ANNOTATIONS 56 (of 120)  
ANNOTATED\_GENES P32745, Q9Y5Y4, P22888, Q02643, P33032, O95838,  
P47211, P21728, P50406, P08588, P21918, P30872, P34947, P34998, P50052, P02649,  
P48039, P46094, P30939, Q13639, Q08116, P30988, O43603, P49146, P43220,  
Q01718, P30874, Q03431, P28221, P47871, P46089, P08172, P25100, P35368,  
Q86UT5, P35372, P34972, Q01726, P32245, P28566, P31391, P41146, Q13324,  
P08912, P41143, O00230, P49286, P34969, P50148, P21554, P13945, P41968, P25021,  
P41145, P01286, P28222

-- 11 of 2799--

GOID GO:0007187  
TERM G-protein signaling, coupled to cyclic nucleotide second messenger  
P-VALUE 1.1364883116015e-22  
CORRECTED P-VALUE 3.18103078417261e-19  
NUM\_ANNOTATIONS 53 (of 111)  
ANNOTATED\_GENES P32745, Q9Y5Y4, P22888, Q02643, P33032, O95838,  
P47211, P21728, P50406, P08588, P21918, P30872, P34947, P34998, P50052, P48039,  
P46094, P30939, Q13639, Q08116, P30988, O43603, P49146, Q01718, P30874,  
Q03431, P28221, P47871, P46089, P08172, P25100, P35368, P35372, P34972,  
Q01726, P32245, P28566, P31391, P41146, Q13324, P08912, P41143, O00230,  
P49286, P34969, P50148, P21554, P13945, P41968, P25021, P41145, P01286, P28222

-- 12 of 2799--

GOID GO:0007601  
TERM visual perception  
P-VALUE 8.83257382219546e-21  
CORRECTED P-VALUE 2.47223741283251e-17  
NUM\_ANNOTATIONS 79 (of 237)  
ANNOTATED\_GENES Q13515, Q02962, Q9Y6N9, P09758, O95475, P35913,  
P19087, Q5T4F7, Q13507, P23942, Q9Y6H8, Q15835, P12271, Q8TDN2, O43186,  
P18545, Q16518, O75445, O00294, P10745, P53674, O75106, P30301, P02489,  
O15537, P29973, O00222, O60840, Q13956, P02753, P22748, P26998, O43636,  
P35243, P78363, O00295, P82279, P05813, P53673, P08100, Q03395, P51160,  
O95834, P47804, P36575, P51841, Q9UBY8, Q3SYG4, P03999, O95237, Q92903,  
P11488, Q9GZU5, P26374, P54845, O60721, O75916, O15492, Q9UI40, O14830,  
Q17R60, O60938, Q13402, P43320, Q16281, Q9Y5M6, P20941, P43080, P28476,  
P17787, P16499, Q9UKL4, P07320, O14926, Q02846, P78424, Q15319, P02452,  
P23415

-- 13 of 2799--

GOID GO:0050953

TERM sensory perception of light stimulus

P-VALUE 1.18376054389842e-20

CORRECTED P-VALUE 3.31334576237169e-17

NUM\_ANNOTATIONS 79 (of 238)

ANNOTATED\_GENES Q13515, Q02962, Q9Y6N9, P09758, O95475, P35913, P19087, Q5T4F7, Q13507, P23942, Q9Y6H8, Q15835, P12271, Q8TDN2, O43186, P18545, Q16518, O75445, O00294, P10745, P53674, O75106, P30301, P02489, O15537, P29973, O00222, O60840, Q13956, P02753, P22748, P26998, O43636, P35243, P78363, O00295, P82279, P05813, P53673, P08100, Q03395, P51160, O95834, P47804, P36575, P51841, Q9UBY8, Q3SYG4, P03999, O95237, Q92903, P11488, Q9GZU5, P26374, P54845, O60721, O75916, O15492, Q9UI40, O14830, Q17R60, O60938, Q13402, P43320, Q16281, Q9Y5M6, P20941, P43080, P28476, P17787, P16499, Q9UKL4, P07320, O14926, Q02846, P78424, Q15319, P02452, P23415

-- 14 of 2799--

GOID GO:0019932

TERM second-messenger-mediated signaling

P-VALUE 3.92722077335909e-20

CORRECTED P-VALUE 1.09922909446321e-16

NUM\_ANNOTATIONS 92 (of 309)

ANNOTATED\_GENES P32745, Q9Y5Y4, P22888, P14138, P01258, P01730, Q00722, P25103, P21918, P30872, P46094, Q9UBF8, P52824, P53805, Q96G91, P30939, P21980, O43614, Q08116, Q9HB89, P30988, Q15077, P41594, P51582, O43603, P43220, P47871, O00329, P46089, P47901, P08172, Q8NEB9, Q86UT5, P35372, Q01726, P32238, P31391, P41146, O00230, P56373, P34969, P28223, P21554, P13945, P25021, P41145, P01286, P35219, P47900, Q02643, P33032, O95838, P47211, P21728, P50406, P08588, P34947, P50052, P34998, P28336, P02649, P48039, P20800, Q13639, P28335, P41180, Q9P212, P01374, Q9GZY6, P49146, Q01718, P30874, Q03431, P28221, Q96RI0, P14416, P17677, P25100, P35368, P34972, P32245, P04818, P28566, Q13324, P62805, P08912, P41143, P49286, P37288, P50148, P41968, P28222

-- 15 of 2799--

GOID GO:0048513

TERM organ development

P-VALUE 7.65420684482145e-19

CORRECTED P-VALUE 2.14241249586552e-15  
NUM\_ANNOTATIONS 320 (of 1832)  
ANNOTATED\_GENES P57679, P22888, Q02962, Q01534, Q06710, O95475, P09544, P20849, Q14469, O15353, P32302, Q9HBY0, P13489, O43186, P98161, Q16635, P21980, P02818, P07316, Q15465, Q16568, Q9Y576, P17509, P15923, P31270, P13497, Q8WZ75, O95948, P31213, P32238, Q99453, P01588, Q12837, P12821, Q02080, Q68DL5, O60663, P01225, P20809, P21728, Q9C019, Q02548, P06401, P48742, O14788, P61812, P21359, P02649, P14651, O14753, Q00653, P78504, P37058, O15522, P24043, Q9BQ70, P01374, O15146, P60953, P51843, P28845, Q99958, P51178, O95980, O95450, P28358, Q9BRP0, P50553, P56703, Q14DW8, O95390, P21246, O15178, P54760, O95947, P19622, P01135, P02452, Q9UKW6, O95185, Q9H2A3, O94788, P16150, Q9HAV5, Q68CZ1, P23942, P05177, Q01955, P25098, Q14993, O75093, Q13224, O00358, Q3ZCU4, O75445, P16615, P11831, Q14318, Q13753, O00238, Q06587, O95076, Q15329, P47928, P49335, P10070, P31267, P01286, P36896, P56696, P18075, Q04721, P27037, Q9H488, Q13705, Q53GA4, P20908, P50052, P08151, P31273, P22003, P41743, O76093, P15863, P13688, O00555, P98177, P55285, Q16254, P30048, P55895, O14786, Q03431, Q13402, P17677, P62263, P98153, P62988, P11487, P08620, O75094, P60660, Q99626, Q05086, Q07687, P35680, Q15319, Q92786, O95259, O43316, Q15306, P09017, O00203, P01730, P09067, Q9NRC9, P05549, P23582, Q15835, Q8WWQ8, P10827, P15291, A1L0T6, P36897, P16989, P41970, Q13285, P30988, P00797, O60542, P30301, Q14623, P10747, P10767, P10071, P28370, P50222, P35227, P52945, Q12870, P14921, Q9Y463, P19235, P10828, P53708, P17542, P21781, P78367, Q9Y698, Q9GZV9, P56706, Q14565, Q03181, Q16650, Q13950, O43435, O15457, P25391, P33681, P12645, P48431, Q9UJU5, O14727, Q02763, O75829, P49454, Q08289, O43184, O60248, Q9UBR4, O60931, Q13485, P14416, P13569, P61296, P13631, Q12791, Q9HBE4, P17787, Q86YL7, P49815, O15156, Q15303, P23760, O00755, Q03052, Q13461, Q02297, O00115, P50148, Q07603, P06213, Q07352, O95863, Q14190, Q08188, P35548, Q9Y261, P23945, P13942, Q9H161, Q12951, O60882, O15198, Q15628, Q9Y3Y4, P09016, P32856, Q9UGM1, P23769, P10276, Q14532, P15056, Q04724, O96004, P06340, Q13769, Q92838, O60902, O00468, O95183, P02753, P31249, Q01196, Q9H9P2, Q8N196, P05556, P34820, P08842, O60344, P57082, P17482, P11473, Q13653, P05111, O14813, Q13635, Q13370, Q14863, A1E959, Q99801, P56693, P16234, Q92481, Q02643, P47902, P62942, Q9UBY8, Q9H2C1, P09603, O75360, P22612, P54845, Q6NT51, P56178, P55347, P28335, O60725, Q15078, Q9P212, Q9H7Z6, P04628, P46109, Q06945, O75593, Q5T230, P35368, O75603, Q9UMR5, Q9H295, P35527, P07320, O43248, O15296, P22301, Q99835, O43763, Q07075, Q9UBC0, O75364

GOID GO:0019226

TERM transmission of nerve impulse

P-VALUE 3.96290410848799e-18

CORRECTED P-VALUE 1.10921685996579e-14

NUM\_ANNOTATIONS 111 (of 437)

ANNOTATED\_GENES Q9BXM0, O15130, O75508, P46098, O75311, O15079, Q14416, P09544, P42261, P21918, Q13002, P23975, Q16099, Q13224, Q9HAB4, Q9NPA1, P31645, P30939, Q13972, O43614, Q9HB89, P25189, O43612, P41594, O43603, O60939, P61106, Q16568, P43005, Q05329, Q03721, Q9Y691, P09172, P47874, O00468, P43007, P43681, O00222, Q13255, P30989, Q99928, O00230, P00439, P56373, Q04844, P34969, P28223, Q16558, Q15825, O43613, Q12840, P32297, P41145, Q13003, O95264, Q9Y277, Q14183, Q9UBY8, Q9Y698, P48058, P21728, P50406, Q03181, Q05901, O14804, Q14831, P21359, P47870, O60755, P02649, Q9UHC6, O00555, Q05586, O14490, Q02410, P28335, P24043, Q12879, P01374, O15146, P28221, Q86W47, P54252, P14416, P62988, Q15878, Q15761, O43526, O14994, P28476, Q12791, P54257, P28566, P17787, P08912, Q9Y5E3, Q9UKL4, O00755, Q9P1A6, Q03052, P49286, Q16566, Q16478, P50148, Q9GZZ6, O00445, Q00975, Q09470, P28222, P39086, P23415

-- 17 of 2799--

GOID GO:0007268

TERM synaptic transmission

P-VALUE 3.37248942440992e-17

CORRECTED P-VALUE 9.43959789892336e-14

NUM\_ANNOTATIONS 99 (of 379)

ANNOTATED\_GENES O15130, P46098, O75311, O15079, Q14416, P09544, P42261, P21918, Q13002, P23975, Q16099, Q13224, Q9HAB4, P31645, P30939, Q13972, O43614, P25189, O43612, P41594, O43603, O60939, P61106, P43005, Q16568, Q05329, Q03721, P09172, P47874, O00468, P43007, P43681, O00222, Q13255, P30989, Q99928, O00230, P00439, P56373, Q04844, P34969, P28223, Q16558, Q15825, O43613, Q12840, P32297, P41145, Q13003, O95264, Q9Y277, Q14183, Q9UBY8, P48058, P21728, P50406, Q05901, O14804, Q14831, P47870, O60755, P02649, O00555, Q05586, O14490, Q02410, P28335, P24043, P01374, Q12879, O15146, P28221, Q86W47, P54252, P14416, P62988, Q15878, Q15761, O43526, O14994, P28476, Q12791, P54257, P28566, P17787, Q9Y5E3, Q9UKL4, O00755, Q9P1A6, P49286, Q16566, Q16478, Q9GZZ6, O00445, Q00975, Q09470, P39086, P23415, P28222

-- 18 of 2799--

GOID GO:0007399

TERM nervous system development

P-VALUE 8.46404144003135e-17

CORRECTED P-VALUE 2.36908519906477e-13

NUM\_ANNOTATIONS 207 (of 1079)

ANNOTATED\_GENES Q9BXM0, Q02962, O95631, P53667, P09544, Q00577, O75382, Q14469, Q15835, O75427, O43186, Q9HAB4, P53805, Q13449, O14773, P36897, Q15465, O60542, Q99581, O15150, P08172, P08700, P28370, P10071, P30542, O95948, O60258, Q16620, P32238, Q99453, O15415, Q12837, P19235, P53708, P10588, Q13214, Q15784, O60663, Q99742, P98172, O14514, P21728, P56179, Q03181, Q02548, P48742, Q16650, O96001, P61812, Q01538, P21359, P48431, P02649, P14651, A0PK02, Q14012, P15289, O14727, O43898, P78504, Q02410, O15522, Q14203, P22466, O15146, O60931, P51843, P49640, Q13485, P14416, Q9UK32, O15202, P28358, Q9UL68, O43526, Q9BRP0, P50553, Q12791, O60609, P49815, P17787, Q15777, O75326, Q9Y5E3, A1A4U0, P49116, Q15303, O00755, O95390, O60462, P54762, P21246, Q03052, O15178, Q15768, P50148, Q02297, P19622, O95861, P78424, Q8NFY4, Q14190, O60229, P39086, Q9Y261, O95185, O75508, O95754, Q9H2A3, P14138, O94788, O15198, Q08174, Q68CZ1, Q13474, P23769, Q99963, O75093, Q13972, Q3ZCU4, Q16518, P43146, O76050, P35221, Q02577, O60902, O00468, P11831, P52803, P31249, O00238, P26441, Q92563, O60344, Q01726, Q12955, Q9UQ52, P47928, P05111, O14813, Q93098, P49335, Q9Y5H9, P10070, Q14863, O95025, Q9NQ87, P61968, O75553, P32297, P01286, P08034, O43711, P56693, Q92481, P18075, Q02643, Q14738, Q14183, O60890, Q04721, Q9UBY8, P35240, P54259, Q9H488, Q9H2C1, P51679, P50052, P08151, P31273, Q99440, O75360, O15540, Q8IYT8, P41743, P54845, O43347, O15420, P56178, O00555, P17405, O95416, Q14576, Q15078, Q12879, O75366, O14786, O00634, Q13402, P54252, O60220, P17677, P04628, O14531, P62988, P26992, O75094, Q9UMR5, O75920, Q02575, Q05086, Q07687, O00144, Q99835, Q15319, O94887, O43763

-- 19 of 2799--

GOID GO:0048518

TERM positive regulation of biological process

P-VALUE 6.21948233354475e-16

CORRECTED P-VALUE 1.74083310515918e-12

NUM\_ANNOTATIONS 306 (of 1814)

ANNOTATED\_GENES Q14164, Q02962, Q06710, P42771, O95631, P53667, P09544, Q00577, Q14469, O00198, Q04864, O43186, P01574, P21980, Q15465, Q16568, Q9UHD0, Q6VMQ6, P00748, P15923, P08700, O14497, O95948, P42701, O60258, Q99453, P25942, P01588, P03952, Q12837, P06681, Q68DL5, P20809, P21728, O75787, O76036, P40933, O14788, P61812, P15151, P21359, P02649,

O94776, Q05215, P20800, A0PK02, Q05586, P98088, Q08722, P43487, P78504, P24043, P22466, Q16552, P01374, P60953, Q96PG8, Q99958, P28358, Q9BRP0, P50553, P49356, O15304, A1A4U0, P21246, O76054, O15178, P15514, P01135, P17181, P49918, P32745, Q6UWB1, O15350, Q9H2A3, Q96IZ0, P14138, Q6UUV9, O94788, P16150, P61247, P55073, Q9HAV5, Q01955, P25098, Q13224, O00358, P00751, Q3ZCU4, Q96GM5, P11831, Q9Y294, Q13956, P01127, O00238, O15519, P47928, O00233, P02748, P56373, Q14004, P10070, Q9NP71, P13945, P01286, P36896, Q9BXL6, P18075, Q04721, O95838, P62753, P27037, Q9UMN6, P05113, Q13705, P50052, P08151, O76093, P17927, P15863, Q15762, Q07011, Q07889, P20823, Q9GZY6, P30048, P53041, P55895, O14786, Q03431, P55211, O75928, P62988, P08620, Q9H3D4, P32245, Q07687, P35680, O75144, P23497, Q15306, P01563, Q13114, O00203, P32971, P01730, Q9NYL2, Q9BZS1, P51668, Q9H2X6, Q15835, Q9UEE5, P10827, Q8WYB5, P15248, O43324, P15291, P48740, P18545, P36897, P16989, O95648, Q13285, P25054, P28908, Q14623, P10747, Q9UK05, Q9H160, P28370, P10071, P22736, P52945, P30542, Q07912, O43734, O15085, P14921, Q9Y463, P28223, P10828, P53708, Q13191, A2NWD3, P21781, Q15654, P98172, P56706, Q03181, Q16650, Q13950, P25391, P33681, O95477, P48431, Q9UJU5, P51610, P84022, P04085, O14727, P40425, O75340, Q02779, Q02156, O60248, P14416, Q13485, P49640, Q9Y2Y8, P11226, P61296, P13631, Q12791, Q9HBE4, P05362, P17787, Q86YL7, O00755, Q13461, P19419, Q02297, P06213, Q969Z0, O15516, P41235, P18428, Q9Y5Y4, Q9Y261, O14543, Q13188, Q9H161, Q12951, Q15628, Q12981, P23769, P10276, P42830, Q13002, O95684, Q04912, O95759, Q9H3Q1, O96004, P43146, P35221, Q92838, O00468, P02753, O00187, P31249, Q01196, P05556, Q9UL32, P00709, P26441, Q9UIH9, Q09161, P35070, P52701, P05111, P28069, P56693, P16234, Q9HC96, Q92481, Q02643, P62942, P35240, Q13501, P08588, Q9H2C1, P01031, O95136, P09603, O75360, P03951, P54845, Q6NT51, P50570, P56178, P55347, P28335, O60725, Q15078, Q9H7Z6, P24385, P15531, P04628, Q06945, O75593, P25100, Q5T230, Q6UY14, P35368, P26992, Q9UMR5, P48023, Q5VVI0, P63241, O60244, O15296, P22301, O43318, Q99835, Q9UBC0, P32970

-- 20 of 2799--

GOID GO:0048522

TERM positive regulation of cellular process

P-VALUE 1.05499528765728e-15

CORRECTED P-VALUE 2.95293181015272e-12

NUM\_ANNOTATIONS 281 (of 1636)

ANNOTATED\_GENES Q14164, Q02962, Q06710, P42771, O95631, P53667, P09544, Q00577, Q14469, O00198, Q04864, O43186, P01574, P21980, Q15465, Q16568, Q9UHD0, Q6VMQ6, P15923, P08700, O14497, O95948, P42701, O60258,

Q99453, P25942, P01588, Q12837, P20809, P21728, O76036, P40933, O14788, P61812, P15151, P21359, P02649, O94776, Q05215, P20800, A0PK02, Q05586, P98088, Q08722, P43487, P78504, P24043, P22466, Q16552, P01374, P60953, Q96PG8, Q99958, P28358, Q9BRP0, P50553, P49356, O15304, A1A4U0, P21246, O76054, O15178, P15514, P01135, P49918, P32745, O15350, Q9H2A3, Q96IZ0, Q6UUV9, P14138, O94788, P16150, P61247, Q9HAV5, Q01955, Q13224, O00358, Q3ZCU4, Q96GM5, P11831, Q9Y294, Q13956, P01127, O00238, O15519, P47928, P02748, O00233, P56373, Q14004, P10070, Q9NP71, P13945, P01286, P36896, Q9BXL6, P18075, Q04721, O95838, P62753, P27037, Q9UMN6, P05113, Q13705, P50052, P08151, O76093, P15863, Q15762, Q07011, Q07889, P20823, P30048, P53041, O14786, Q03431, P55211, O75928, P62988, P08620, Q9H3D4, Q07687, P35680, O75144, P23497, Q15306, P01563, Q13114, O00203, P32971, P01730, Q9NYL2, Q9BZS1, P51668, Q9H2X6, Q15835, Q9UEE5, P10827, Q8WYB5, P15248, O43324, P15291, P18545, P36897, O95648, Q13285, P25054, P28908, Q14623, P10747, Q9UK05, Q9H160, P28370, P22736, P52945, P30542, Q07912, O43734, O15085, P14921, P28223, Q9Y463, P10828, P53708, A2NWD3, P21781, Q15654, P98172, P56706, Q03181, Q16650, Q13950, P25391, P33681, O95477, P48431, Q9UJU5, P51610, P84022, P04085, O14727, P40425, O75340, Q02779, Q02156, O60248, P14416, Q13485, P49640, Q9Y2Y8, P13631, P61296, Q12791, Q9HBE4, P05362, P17787, Q86YL7, O00755, Q13461, P19419, Q02297, P06213, Q969Z0, O15516, P41235, P18428, Q9Y5Y4, Q9Y261, O14543, Q13188, Q9H161, Q12951, Q15628, Q12981, P23769, P10276, P42830, Q13002, O95684, Q04912, O95759, Q9H3Q1, O96004, P43146, P35221, O00468, P31249, Q01196, P02753, P05556, Q9UL32, P26441, P00709, Q9UIH9, Q09161, P35070, P52701, P05111, P28069, P56693, P16234, Q9HC96, Q92481, Q02643, P62942, P35240, Q13501, Q9H2C1, O95136, P09603, O75360, P54845, Q6NT51, P50570, P56178, P55347, P28335, O60725, Q15078, Q9H7Z6, P24385, P15531, P04628, Q06945, O75593, P25100, Q5T230, Q6UY14, P35368, P26992, Q9UMR5, P48023, Q5VVI0, P63241, O60244, O15296, O43318, Q99835, Q9UBC0, P32970

-- 21 of 2799--

GOID GO:0007166

TERM cell surface receptor linked signal transduction

P-VALUE 2.9647558871515e-15

CORRECTED P-VALUE 8.29835172813705e-12

NUM\_ANNOTATIONS 423 (of 2731)

ANNOTATED\_GENES P50391, P22888, O15130, P01258, Q14416, P29376, P09544, Q00722, P32302, Q9NYW3, P30872, O75578, O95918, P01574, P46094, P98161, P52824, Q96G91, P21980, O43614, Q07666, Q15465, P51582, Q16568, O00451, P22607, Q01082, Q86UT5, O95948, Q9H255, P42701, O60258, P49802,

Q16620, P32238, P48169, P30989, O94810, P29371, O75581, P08173, P08100, P47804, P01225, Q9NYV7, P46093, P21728, P03999, P33765, O14804, O43541, O14924, P23468, Q9NS67, P34998, P11488, P28336, P61812, Q59GJ8, O60755, P02649, Q9Y3N9, P49758, P20800, O75388, Q9HCQ7, Q05586, Q08722, O43898, P78504, O75916, Q8NC01, P41180, Q13467, P60893, P34995, P22466, O15146, Q99958, O95297, P47881, Q9HCN6, O60726, Q9UBT3, P50553, P28476, Q9NYW1, P56703, O43789, P08912, P47890, P54762, P49286, P21246, P15514, Q15768, P54760, P01135, P17181, P49918, P32745, P58182, Q6UWB1, P14138, Q9UKL2, P19087, P16150, Q5T4F7, Q68CZ1, P42263, Q01955, P25098, Q01362, Q13224, Q3ZCU4, Q13607, Q9HB89, O43612, Q9NYV9, P29320, O76099, O00329, P46089, Q14968, P18031, P08922, Q14318, P51685, O00325, Q13956, P01127, O00238, Q86T24, P09471, P16520, Q15618, O43192, Q13255, Q01726, P49685, Q9UQ52, Q99928, O75889, Q93098, Q9H2H0, P10070, P21554, Q06481, P13945, P41145, Q96R84, P01286, P36896, P07359, P47900, P51841, P18075, O75810, Q04721, Q9P1P5, O95838, P27037, O43813, Q7Z4W6, Q9H488, P11215, P35348, Q13705, P34947, P47872, P50052, P08151, P41587, Q9NYW0, P48039, O76093, P13688, Q15762, O00555, Q07889, P98177, Q9NYW6, Q9UBU2, P40238, Q9GZY6, Q12879, O95672, O14786, Q03431, P28221, P55107, Q96RI0, O60883, P17677, O60383, Q99061, O43559, O60242, Q9H3D4, P23416, O60262, O14939, P32245, Q6NV75, Q13606, P37288, O95222, P26012, P23497, P30550, P01563, P09758, O15524, P01730, Q8N6U8, Q9NYV8, Q9H2X6, Q12913, Q9BZC5, P47898, Q93097, Q15835, P49796, P12872, O75023, P18545, P63211, Q9ULV8, P46091, P30939, Q9Y585, P36897, P25054, P30988, Q15077, Q8WU20, P43220, P21731, Q9GZP7, O95405, O75962, P10747, P47901, Q99988, P08172, Q9UK05, Q5UAW9, O00222, Q8WXXV1, P10071, Q6NTB5, O95157, P35372, P30542, Q9UGF7, Q99750, P41146, O15085, O43193, P34969, P28223, P08514, P53708, P05067, Q15613, Q13258, Q13191, A2NWD3, P54756, Q13003, O95264, O14843, P34981, O14514, O95813, P56706, P50406, Q16671, O76002, O15530, Q13950, O00155, P25391, O95477, P41586, O95800, O43194, O00253, P04085, P84022, Q13639, Q02763, O75829, P21452, P49146, O14581, P47775, Q13485, P14416, Q15375, P58173, Q15761, P13631, O43749, P49682, P49815, Q13324, Q15303, P10082, P34903, O00755, A1L156, Q14CE0, O00590, Q02297, P50148, P05106, P06213, P25092, P39086, P23415, P28222, Q9Y5Y4, P35548, P18428, O60404, P23945, O14543, Q9Y3Y4, O15198, P25103, Q14451, P47887, P21918, O43312, Q9NTG1, P16471, Q13002, Q04724, O60403, Q16099, Q08116, P41594, P35221, O43603, P14616, P12931, P47871, O00468, P05556, Q5IFH6, P01222, P50150, P26441, O14836, O95996, Q9H0K1, P05111, Q9NZD1, P31391, O00230, Q13635, A4QMS5, O43613, O43424, P25021, Q9NQ87, P32297, P16234, P34982, Q02643, P49810, P33032, P48058, P47211, Q9NS66, P08588, Q9H0E9, P51679, P01031, O95136, O95158, Q14831, P17098, P47870, O75360, P46092, O15492, P28335, Q9P212, Q15078, P48546, Q01718,

P30874, P08949, P04628, P30968, Q06945, O75593, P25100, P31644, P20941, P35368, P26992, P32298, Q99677, P04201, Q9NQN1, O00574, P34972, O00254, P28566, P41143, O75078, Q16478, P32247, O00144, Q13797, Q02846, O43318, P41968, Q99835, Q9UBC0

-- 22 of 2799--

GOID GO:0009887

TERM organ morphogenesis

P-VALUE 1.52348083888821e-14

CORRECTED P-VALUE 4.2642228680481e-11

NUM\_ANNOTATIONS 143 (of 693)

ANNOTATED\_GENES Q02962, P09017, O95475, P20849, P09067, Q14469, Q9NRC9, O15353, Q15835, Q8WWQ8, P10827, P13489, O43186, P15291, P98161, A1L0T6, P21980, P02818, P36897, P41970, Q15465, Q14623, P17509, P31270, P10767, P13497, P10071, P50222, P35227, P52945, Q8WZ75, O95948, Q12870, P53708, Q68DL5, P78367, P56706, Q02548, P48742, P61812, Q13950, O43435, P21359, P48431, P02649, Q9UJU5, P14651, Q02763, P78504, O75829, Q9UBR4, P51178, P28358, Q9BRP0, P61296, P13631, Q14DW8, O00755, P23760, O95390, O15178, P54760, P01135, Q07603, P06213, Q07352, P02452, P35548, O94788, Q9H161, Q12951, O60882, Q68CZ1, P09016, P32856, Q9UGM1, P23769, Q01955, P15056, Q04724, O00358, Q3ZCU4, O96004, Q92838, P11831, P31249, O00238, Q01196, P02753, Q06587, O95076, Q15329, P57082, P11473, Q13653, Q13635, P10070, P31267, A1E959, P56693, P16234, P56696, P18075, P47902, Q04721, P62942, Q9H488, Q53GA4, P50052, P20908, P08151, P31273, O75360, P41743, P54845, O76093, P13688, Q6NT51, P56178, P98177, P55347, P28335, Q16254, O60725, O14786, Q13402, P04628, P98153, P46109, P08620, P11487, P35368, O75094, Q99626, O43248, Q07687, Q92786, Q15319, Q99835, Q07075, Q9UBC0, O43316, O75364

-- 23 of 2799--

GOID GO:0050890

TERM cognition

P-VALUE 2.429586544814e-14

CORRECTED P-VALUE 6.8004127389344e-11

NUM\_ANNOTATIONS 181 (of 955)

ANNOTATED\_GENES O60266, Q13515, Q02962, Q9Y6N9, P09758, O95475, Q9NRC9, O14829, Q9NYV8, Q9NYW3, Q15835, P12271, O95918, Q8TDN2, O43186, P18545, Q8NFU1, Q9Y585, Q9NZW4, O00294, P10745, P43220, P53674, P30301, P22607, P43007, P43681, O00222, P51172, P35372, P26998, O15399, Q9UGF7, Q9H255, P41146, P82279, Q12837, P05813, P28223, P10828, P15313,

P53708, Q15613, P08100, Q03395, P10588, Q15784, P51160, P47804, P36575, P17900, Q9NYV7, Q3SYG4, P21728, P03999, O95237, O76002, Q92903, Q9Y5Y9, P11488, P21359, O60755, P48431, P26374, Q9Y3N9, Q05586, Q08828, O75916, O75083, Q9UI40, Q17R60, O14581, O60931, O60938, P14416, P51170, P43320, Q16281, P58173, P47881, Q9Y5M6, O43749, P28476, P43080, Q9NYW1, Q12791, P17787, O43789, P16499, P23760, P47890, P21246, O14926, P78424, P02452, P23415, P58182, O60404, P14138, P13942, P35913, Q9UKL2, P42261, P19087, Q13507, Q5T4F7, P47887, P23942, Q9Y6H8, Q9UGM1, Q01955, O60403, Q13224, Q13972, Q16518, Q13607, O75445, P41594, O43603, Q9NYV9, O76099, P31025, O75106, P47874, P29973, O15537, P02489, Q01064, Q13956, O60840, O95500, Q9HC10, P02753, Q8N196, P22748, O43636, Q15618, P35243, P78363, O00295, P56373, P49335, P53673, P41145, Q96R84, P37088, P56693, P34982, O95834, P51841, P56696, Q9Y277, Q9UBY8, P35240, Q14831, Q9GZU5, Q9NYW0, P54845, O60721, O15492, P28335, Q9NYW6, O75762, O14830, Q12879, Q13402, O60220, P31644, P20941, P35368, Q9NQN1, Q13606, P57727, Q9UKL4, P07320, P15382, O00144, Q02846, Q15319, O95222, Q14573

-- 24 of 2799--

GOID GO:0030154

TERM cell differentiation

P-VALUE 1.27239663409528e-13

CORRECTED P-VALUE 3.5614381788327e-10

NUM\_ANNOTATIONS 288 (of 1753)

ANNOTATED\_GENES Q99584, Q02962, Q01534, Q06710, O95631, P53667, P09544, Q14469, O15353, O43186, Q96J94, P02818, Q15465, Q16568, Q99581, P15923, P31270, P13497, O43897, Q8WZ75, O95948, P31213, Q16620, P32238, Q99453, P01588, Q12837, Q9NR12, P12821, Q13214, O60663, P20809, P21728, Q9C019, Q02548, P06401, P48742, O14788, Q05066, P61812, P21359, Q59GJ8, P02649, A0PK02, Q00653, P78504, O15522, Q13467, O95365, O15146, P60953, P51843, P25874, P28358, Q9UL68, Q9BRP0, P50553, P56703, Q14DW8, O75326, Q86VD1, A1A4U0, O95390, O15178, Q15768, O95947, P19622, O95185, O95754, Q9H2A3, P14138, O94788, P16150, Q5T4F7, Q9HAV5, O00526, Q14993, O75093, Q13972, Q3ZCU4, Q06455, Q16518, O75445, Q02577, Q9P2T0, P11831, Q14318, O00238, Q92563, Q01726, P47928, Q5UIP0, P52594, Q9H5I1, P49335, P10070, O95025, P36896, P18075, O60890, Q04721, P27037, Q8TC59, Q13705, P08151, P31273, P22003, Q8IYT8, P41743, O76093, P15863, O00555, Q00597, P98177, Q16254, P30048, Q12879, P55895, O14786, Q03431, Q9NWH7, Q13402, P17677, O60383, P62263, P62988, P11487, P08620, Q13117, O75094, P12035, Q99626, Q14093, Q07687, Q86YV9, Q15319, Q92786, O95259, O94887, O43316, Q15306, O15524, O00203, P09067, P01730, Q9NYL2, P27216, Q15835, P15291, P53805,

P36897, Q13285, P25054, P30988, Q9Y236, Q14623, P10747, Q14990, Q9HCT0, P10767, P10071, P28370, P52945, Q99750, P35663, P14921, Q9Y463, P10828, P53708, P17542, P10588, Q15784, Q13939, O14514, P98172, Q9Y698, Q9GZV9, Q3SYG4, P56706, Q03181, Q16650, Q01538, Q13950, P25391, P41586, P33681, P12645, P48431, Q9UJU5, Q14012, O75829, Q08289, O43184, Q9NS25, O43439, O60248, P14416, Q13485, P49640, O75602, P61296, Q12791, Q9HBE4, O60609, P78362, P17787, Q15303, O15156, O00755, Q03052, O60462, Q05952, Q13461, Q02297, O00115, P50148, P78424, Q07352, Q8NFY4, Q12824, Q14190, Q08188, Q9UHL0, Q9Y261, O14543, Q5FVE4, P32856, P23769, P10276, O96004, P43146, P06340, P47989, P35221, Q13769, Q92838, O00468, P52803, O95183, P31249, Q01196, P05556, Q8N196, P34820, P26441, O60344, Q12955, P05111, O14813, O75553, P32297, O43711, P56693, Q02643, Q9UBY8, P35240, Q13501, P08588, Q9H2C1, P51679, P09603, O75360, P54845, Q6NT51, P56178, P55347, Q15078, Q14576, Q9H7Z6, Q9Y6L7, Q9BXA7, O00634, P24385, P04628, Q06945, O75603, Q9H295, Q5VVI0, Q02575, O43248, Q96PF2, O15296, P15382, O00144, P22301, Q99835, O43763, Q9UBC0

-- 25 of 2799--

GOID GO:0009653

TERM anatomical structure morphogenesis

P-VALUE 2.05362780680916e-13

CORRECTED P-VALUE 5.74810423125883e-10

NUM\_ANNOTATIONS 248 (of 1461)

ANNOTATED\_GENES Q02962, P09017, Q06710, Q12959, O95475, O95631, P53667, P20849, P09067, Q14469, Q9NRC9, O15353, Q15835, Q93097, Q8WWQ8, P10827, P13489, O43186, P15291, P98161, A1L0T6, P21980, P02818, P36897, P41970, P25054, Q15465, O60542, Q14623, P17509, P31270, P10767, P13497, P50222, P10071, P35227, P52945, Q8WZ75, O95948, Q12870, P32238, P82279, O15085, Q12837, Q9Y463, P53708, Q68DL5, Q13214, A2NWD3, Q6UXY1, P78367, P98172, O14514, O95813, P56706, Q9C019, Q16671, Q02548, P06401, P48742, Q16650, Q9UQR0, P61812, Q13950, O43435, P21359, P25391, P15311, Q59GJ8, P48431, P02649, Q9UJU5, P14651, Q12849, A0PK02, O14727, Q02763, P78504, O75829, O43184, P41180, O15522, Q13467, P40425, O60248, O43439, P60953, Q9UBR4, Q99958, P51178, Q13485, P14416, P28358, Q9UK85, O75602, Q9BRP0, P61296, P13631, O60609, P56703, P23759, P49815, Q86YL7, P17787, Q14DW8, A1A4U0, O00755, P23760, O95390, O60462, O14926, O15178, Q15768, P54760, P50148, O95947, P01135, Q07603, P06213, Q07352, P02452, O95863, P35548, Q08188, Q9Y261, O95185, O95754, Q9H2A3, P18206, O94788, Q9H161, O75333, Q12951, O60882, P16150, Q5T4F7, Q68CZ1, P09016, O43312, P32856, O00526, Q9UGM1, P23769, Q01955, P15056, O60312, Q04724, O75093, A0PJG1, O00358,

Q9H3Q1, Q13972, Q3ZCU4, O96004, P43146, P47989, P35221, Q92838, P11831, P02753, P01127, Q01196, O00238, P31249, Q06587, O95076, P01222, Q15329, P57082, Q12955, P11473, Q13653, Q13635, P10070, Q9NP71, P31267, A1E959, P61968, Q9UHF3, P32297, Q99801, O00482, P07359, P16234, P56693, P56696, P18075, P47902, O60890, Q04721, P62942, P27037, Q9H488, Q9H2C1, Q53GA4, P20908, P50052, P08151, P31273, O75360, Q8IYT8, P41743, O76093, P54845, Q6NT51, P13688, P56178, O00555, P98177, P55347, P28335, Q16254, O60725, Q15078, O14786, O00634, Q13402, Q13795, P17677, P04628, O60383, P46109, P98153, P62988, P11487, P08620, P35368, O75094, P04201, P12035, Q99626, O00425, Q5VVI0, P35556, O43248, O15296, Q07687, P15382, Q99835, Q15319, Q05JQC9, Q92786, O95259, Q9UBC0, Q07075, O43763, O43316, O75364

-- 26 of 2799--

GOID GO:0007154

TERM cell communication

P-VALUE 4.85268761056818e-13

CORRECTED P-VALUE 1.35826726219803e-09

NUM\_ANNOTATIONS 833 (of 6205)

ANNOTATED\_GENES O95944, Q9Y4I4, P50391, O15130, P01258, Q9NP86, O60906, P32302, Q9NYW3, P30872, O95755, Q13283, O75578, P01574, P23975, Q8NG66, P98161, Q9NPA1, P52824, P21980, Q07666, P18509, Q9Y6J3, Q16568, O00451, Q9Y576, O14654, P43007, P09681, Q8WUA7, Q01082, Q9NYZ4, Q15759, Q8NEB9, O14497, Q86UT5, O15399, P31213, Q9H255, O60258, P49802, P22105, Q16620, P32238, P48169, Q99445, P25942, P30989, P42684, Q04844, Q15382, P29371, P08173, O14544, Q68DL5, Q13214, P50453, Q6UXY1, P20809, Q99742, Q9NYV7, O75448, P46093, O75787, P11488, P21359, O60755, O43898, P78504, O75916, P41180, Q13467, P34995, P01374, Q86W47, Q99958, O95297, P51178, P29762, Q3KR16, A4FU63, P47881, Q9HCN6, O60726, O75469, Q9UBT3, P50553, P28476, P43080, O43789, Q14DW8, P54762, P49286, P15514, P01135, P17181, Q92772, P49918, P32745, P49703, O95754, P10826, O94788, P35913, Q9UKL2, P42261, P19087, Q08174, Q68CZ1, O00409, Q9Y6H8, Q01955, P25098, Q13224, Q05513, P31645, Q13972, P25189, O43612, Q9NYV9, P29320, O00329, P46089, Q14968, P08922, P18031, P51685, O00325, Q13956, O00238, Q86T24, O15519, Q15618, Q13255, Q01726, P49685, Q9UQ52, O00233, O95081, P02748, P51149, Q99928, P00439, P56373, P57058, Q9H2H0, P10070, Q06481, Q4KMP7, P41145, P01286, Q6ZT07, P47900, Q13163, Q04721, Q9P1P5, O95838, O43813, Q08AM6, Q9H488, P11215, P35348, Q13705, Q13477, P47872, P08151, P41587, Q9NYW0, Q8IYT8, P21796, P48039, O00555, P23508, P98177, Q9UBU2, P40238, Q12879, Q14512, P53041, O95672, P28221, Q96RI0, O60883, O15547, O75928, P62988, P11487, P08620, O60242, O14994, O60262, P32245, Q05BE4, Q6NV75, Q13077,

Q9UPW8, Q16566, P37288, Q8NCG5, O75144, Q9GZZ6, Q5JQC9, O94887, O14511, A0JLP1, O96013, P78562, Q9BXM0, P23497, P01563, P09758, O43699, Q13114, P32971, P01730, Q9NYL2, Q9NYV8, Q9H2X6, Q12913, P47898, Q15835, Q14641, Q9UEE5, O43324, P49796, P12872, P53805, Q13285, P30988, P25054, O60939, P00797, Q8WU20, P43005, P21731, O95405, O15055, O00522, Q99988, Q9P2N2, P10767, P10071, Q6NTB5, P35372, P41146, P52564, O43193, O15376, P34969, P28223, P19235, P08514, Q15771, Q14432, O75116, Q15613, Q13258, Q13191, P54756, P21781, P41273, O95264, Q9NR48, Q01113, Q03181, Q9H252, P12314, O76002, Q16671, O15264, Q9P0X4, Q92903, O96001, Q13950, Q17R43, O00155, P41586, Q15172, Q9UHC6, O00253, P04085, P84022, O14727, O43283, Q02763, Q02410, O15013, P49146, O14581, Q13609, Q9UQ05, A1E5M1, P47775, Q13485, P14416, O95202, Q15761, P13631, Q12791, Q9HBE4, P78362, P17787, Q13324, Q15303, P10082, O75901, P34903, Q03052, O60229, P18428, O75325, O15198, P25103, Q14451, P47887, O43312, P16471, P02768, P42127, Q9UBF8, Q04912, O95759, P01567, P41594, P61106, P19174, Q9Y691, P12931, Q92838, P47874, P47871, P52803, P02753, Q5IFH6, P26441, Q13237, O60344, Q9H0K1, P52701, Q9NPB3, P05111, P11473, Q13635, Q15825, Q13370, O43613, O43424, Q9NQ87, Q12840, P20340, O95389, P08034, Q14738, O43295, Q17R89, P62942, P47211, Q9NS66, Q15208, P51679, Q9H2C1, O95158, Q14831, Q9H3V2, O75360, P46092, O14684, Q1ZYL3, Q13886, O15492, P17405, P30874, P08949, P24385, P02760, P30968, P04628, P25100, O75593, P35368, P32298, Q99677, O00574, Q9Y264, O00254, O75078, O43248, O60244, Q16478, P41968, Q99835, Q9UBC0, Q00975, Q5T442, Q15750, Q15555, O60266, Q14164, P22888, O43182, P53667, P09544, P29376, Q14416, Q00722, Q5TCZ1, Q04864, O43687, O95918, P46094, Q96G91, O43614, Q15404, Q15465, P51582, Q05329, P01350, P09172, Q9UHD0, P22607, P80098, P43681, P31270, P08700, O95948, P42701, Q14123, P01588, O94810, Q14236, O75581, Q9Y2I9, P08100, P51160, P47804, P36575, P01225, O60921, P21728, P03999, P33765, O14804, O14924, O76036, O43541, P40933, P23468, P06401, Q9NS67, P34998, O00561, P28336, P61812, Q59GJ8, P02649, Q9Y3N9, P49758, P20800, P35225, O75388, Q9HCQ7, Q05586, Q08722, P43487, Q00653, Q8NC01, P60893, P24043, P22466, Q16552, O15146, P57773, P60953, Q9BU20, P51843, Q96PG8, Q9UK32, Q16281, P57789, Q9NYW1, Q8IXF0, P56703, P16499, P08912, P47890, O15178, P21246, Q15768, P27815, P54760, Q09470, P58182, Q6UWB1, Q13177, O95185, O75508, O15350, P14138, Q15907, Q9NSN8, P14619, P16150, Q5T4F7, Q9HAV5, Q6ZW31, P42263, Q99963, O43147, Q01362, O60447, O94989, Q9Y2Y0, Q9UBG7, Q3ZCU4, Q13607, Q9HB89, Q07890, P49137, P80192, O76099, Q02833, O43251, Q01064, Q14318, P01127, P09471, P16520, O43192, P51671, P35243, Q9NXL2, P52594, O75889, Q93098, Q16558, Q12852, P21554, P13945, O14990, O15259, Q96R84, P36896, Q9BXL6, P10114, P07359, P51841, Q9Y277, P18075, O75810, O60890, P27037, P36406, P62753, Q14571,

Q7Z4W6, P34947, P50052, P41743, Q99490, O76093, Q13554, Q12802, P13688, Q15762, Q07889, Q9NYW6, Q9GZY6, Q03431, O75628, O14786, P55211, P55107, Q15120, P54252, Q13795, P17677, O60383, O43741, Q99061, P55196, O43559, Q9H3D4, O00178, P23416, O14939, Q13572, Q13393, P04818, Q13606, O75783, O00445, O95259, O95222, Q9HCR9, Q01344, P26012, P30550, P46098, Q14155, O15524, O15079, O75952, Q8N6U8, Q8WXH6, Q9BZC5, Q93097, Q9Y2B4, O75023, P18545, Q9HAB4, Q9UGP4, P63211, Q9ULV8, P46091, P30939, Q9Y585, P36897, P41970, O43921, Q15077, O75161, Q03721, P43220, P06748, Q9GZP7, P28908, Q13671, O75962, Q14623, P47901, P10747, P08172, Q9UK05, Q5UAW9, O00222, Q08462, Q9H160, Q13596, Q8WXV1, A0JNU9, P22736, O95157, Q9Y2X0, P30542, P52945, Q9UGF7, Q99750, Q07912, O75761, O43734, P82279, O15085, P53708, P78314, P05067, P10588, A2NWD3, Q13003, O14843, Q15654, P34981, O14514, P98172, O95813, Q9Y698, P56706, P50406, O75896, Q05901, O15530, P47992, P25391, O95477, P33681, P12645, O95800, O43194, Q13087, Q14012, O14490, Q13639, O75829, O60519, P21452, Q02779, Q02156, O14733, O95835, Q15375, P58173, O60503, O43526, Q6GQQ9, Q14168, O43749, P49682, P35858, O60609, P49815, Q86YL7, P62805, Q9Y5E3, O00755, A1L156, O00590, Q14CE0, O15484, P10911, Q02297, P50148, P05106, P06213, O00459, P25092, O15397, P52757, O15516, P39086, P23415, Q14190, P28222, Q13835, Q9Y5Y4, P35548, O60404, P23945, O14543, O75311, Q13188, Q9Y3Y4, Q15628, P28472, P21918, P04808, P32856, P10276, Q9NTG1, Q9NPH9, P56559, Q13002, P42830, Q13588, P12757, Q04724, O60403, Q16099, Q8NI35, P36405, Q08830, Q9H3Q1, P51451, Q08116, Q15822, O00175, P35221, O43603, O75343, P14616, O00468, P05556, P01222, P50150, P00709, P61225, O14836, O95996, Q12955, O43555, Q9Nzd1, P31391, O00230, A4QMS5, Q15139, P25021, Q13459, P32297, P35219, Q9Y478, P16234, Q9HC96, P34982, Q02643, Q14183, P49810, P33032, Q9UBY8, P48058, P35240, Q13501, P08588, Q9H0E9, P01031, O95136, Q9BRG2, Q5JPD2, P17098, P47870, P50570, P28335, O60725, Q9P212, Q15078, P48546, Q9H596, Q01718, Q06945, P46109, P31644, Q00005, Q15878, P20941, P26992, P04201, Q9UMR5, Q9NQN1, P34972, P48023, P54257, P28566, P41143, Q9UKL4, Q15057, Q9P1A6, P32247, P22301, Q13797, O00144, Q02846, O43318, O15467, Q07075, P32970, Q14573

-- 27 of 2799--

GOID GO:0006366

TERM transcription from RNA polymerase II promoter

P-VALUE 6.51681507046044e-13

CORRECTED P-VALUE 1.82405653822188e-09

NUM\_ANNOTATIONS 170 (of 912)

ANNOTATED\_GENES P51786, P23497, Q9Y2Y4, Q02962, Q06710, O75971, O15266, Q14469, P05549, O15353, Q7KZ85, O60583, P10827, O43186, P16989, Q13285, Q9Y2D1, Q15465, Q13863, Q99581, P04198, Q14623, Q6VMQ6, P22736, P35227, Q15697, Q9Y2X0, P52945, O95948, Q99750, Q12870, O14647, P61244, P52747, O43829, P01588, Q12837, P14921, O75486, Q13487, Q15784, Q9NR48, Q99742, P20809, P78367, P35711, O75448, Q03181, Q02548, Q16650, O75446, Q13950, O43435, Q12873, P48431, O94776, Q9UJU5, Q02446, P51610, Q05586, P84022, O14753, Q9Y651, O15522, O95365, P40425, Q9BQ70, Q16552, O60248, P50549, P51843, O75478, O75528, P49640, Q13485, Q9NR55, P28358, P61296, P13631, P50553, Q16656, P23760, O15178, Q13461, O15370, P19419, P78424, Q9UKW6, O15516, Q14190, Q12824, P41235, Q9Y261, Q9H2A3, Q6UUUV9, Q96IZ0, Q9H161, O75333, P41223, P23769, P12757, Q15466, Q10587, O75909, P51531, O00358, Q3ZCU4, O96004, Q96GM5, Q9H944, O00472, O00468, P11831, O75031, Q01196, O95125, Q96KN3, Q03111, P47928, P28069, Q6P4R8, P10070, Q9NP71, P61968, O43812, O00482, P56693, Q92481, P18075, O00488, P54259, Q9Y6J9, Q13501, Q9H0E9, P09086, P08151, P31273, P17098, O75360, Q13862, P54845, P15863, Q6NT51, Q13886, A2RRE3, P98177, P55347, Q01658, Q16254, P20823, Q15406, Q14582, P62263, O75593, Q5T230, Q01094, Q14541, P52655, Q99626, Q5VVI0, O60244, O95163, Q07687, Q14241, P55199, Q00987, Q15319, Q9UBC0, Q15643, P51532

-- 28 of 2799--

GOID GO:0008283

TERM cell proliferation

P-VALUE 1.21410274484466e-12

CORRECTED P-VALUE 3.3982735828202e-09

NUM\_ANNOTATIONS 198 (of 1118)

ANNOTATED\_GENES Q15555, Q01344, P30550, P09758, Q01534, Q12959, P42771, O95631, P32971, P09544, Q00577, Q14469, Q9NYL2, O15353, Q9BZS1, P56545, Q9NPF7, P30872, Q14641, O43324, P15248, P01574, P15291, P21980, P36897, Q07666, P25054, Q15465, P06748, P28908, Q14623, O15150, P10747, P30307, P10767, P08700, P10071, P35372, P52945, P42701, O60258, Q99445, P25942, P01588, P14921, P28223, P08173, P12821, P17542, A2NWD3, P21781, P41273, P01225, Q01113, P20809, P98172, O14514, O95813, O75896, Q03181, P40933, P06401, P11488, P61812, Q13950, P21359, P25391, P02649, Q05215, P20800, P04085, P98088, Q08722, Q02763, P78504, P49454, O15522, P22466, P06127, P01374, Q13485, P14416, P30260, Q9BRP0, P13631, P50553, Q9HBE4, P49815, Q86YL7, P49356, P17787, P08912, Q15303, P10082, O95390, P21246, O15178, P15514, Q13461, P54760, P01135, O95995, Q969Z0, Q9UKW6, Q12824, P49918, P32745, P41235, P35548, Q96IZ0, P14138, O94788, P55273, P16150,

Q01955, P42830, Q01362, O95684, O60447, Q04912, P51531, O95759, Q13972, Q14201, P35221, O43251, P02753, P01127, Q8N196, P05556, Q06250, O14683, P35070, P47928, P05111, P31391, P28069, Q13635, Q14004, Q15139, P10070, P01286, Q99801, P16234, Q02643, P18075, Q04721, O95838, P27037, P35240, O43598, Q9H2C1, P35348, O95136, P09603, P08151, O15540, O76093, Q07011, P56178, P98177, Q16254, O60725, P40238, Q9P212, Q15078, Q14512, P30048, P55895, P30874, Q03431, Q15406, O14786, P15531, Q14582, Q06945, P25100, P11487, P08620, P35368, Q01094, P26992, P04201, Q9UMR5, P56277, P63241, Q16674, O15296, P55789, P22301, O00144, O75144, Q9GZZ6, Q99835, Q92786, Q00987, Q07075, P32970

-- 29 of 2799--

GOID GO:0031279

TERM regulation of cyclase activity

P-VALUE 2.77509213500871e-12

CORRECTED P-VALUE 7.76748288588939e-09

NUM\_ANNOTATIONS 36 (of 94)

ANNOTATED\_GENES Q9Y5Y4, Q02643, P10323, P01258, Q14416, P47211, P21728, P08588, P33765, P21918, Q14831, P34998, P21359, O60755, Q96G91, Q08116, P30988, P18509, P48546, P49146, P43220, Q03431, P30874, P47871, P46089, O00222, P43080, P41146, P08912, P41143, O00230, P34969, P50148, P13945, P41145, P01286

-- 30 of 2799--

GOID GO:0001501

TERM skeletal system development

P-VALUE 2.79866212179657e-12

CORRECTED P-VALUE 7.8334552789086e-09

NUM\_ANNOTATIONS 84 (of 355)

ANNOTATED\_GENES P78562, P35548, P57679, P09017, P13942, Q9H161, O15266, P09067, Q9NRC9, P09016, P10827, Q14993, P98161, A1L0T6, P02818, P36897, P30988, Q15465, Q9NZW4, P21815, O60902, P22607, Q14623, P17509, P02753, O00238, P31270, P31249, P10767, O95076, P34820, P10071, P13497, Q14055, P35227, O43897, P57082, P17482, Q12870, P05111, P11473, Q9NR12, P10070, P15313, P10828, P31267, A1E959, P18075, P78367, P27037, Q9GZV9, P56706, P56179, Q13705, Q99218, P08151, P31273, P61812, Q13950, P22003, O43435, P21359, P12645, O76093, P15863, Q6NT51, P14651, P56178, O75829, P41180, Q03431, P55107, P28358, P08620, Q13103, Q14DW8, O43248, O00755, O95390, P21246, Q07687, P50148, Q99835, P02452

-- 31 of 2799--

GOID GO:0045761

TERM regulation of adenylate cyclase activity

P-VALUE 4.80042656599153e-12

CORRECTED P-VALUE 1.34363939582103e-08

NUM\_ANNOTATIONS 35 (of 91)

ANNOTATED\_GENES Q9Y5Y4, Q02643, P10323, P01258, Q14416, P47211, P21728, P08588, P33765, P21918, Q14831, P34998, P21359, O60755, Q96G91, Q08116, P30988, P18509, P48546, P49146, P43220, Q03431, P30874, P47871, P46089, O00222, P41146, P08912, P41143, O00230, P34969, P50148, P13945, P41145, P01286

-- 32 of 2799--

GOID GO:0051339

TERM regulation of lyase activity

P-VALUE 5.74512107111939e-12

CORRECTED P-VALUE 1.60805938780632e-08

NUM\_ANNOTATIONS 36 (of 96)

ANNOTATED\_GENES Q9Y5Y4, Q02643, P10323, P01258, Q14416, P47211, P21728, P08588, P33765, P21918, Q14831, P34998, P21359, O60755, Q96G91, Q08116, P30988, P18509, P48546, P49146, P43220, Q03431, P30874, P47871, P46089, O00222, P43080, P41146, P08912, P41143, O00230, P34969, P50148, P13945, P41145, P01286

-- 33 of 2799--

GOID GO:0007600

TERM sensory perception

P-VALUE 5.84933758846374e-12

CORRECTED P-VALUE 1.637229591011e-08

NUM\_ANNOTATIONS 160 (of 865)

ANNOTATED\_GENES O60266, Q13515, Q02962, Q9Y6N9, P09758, O95475, Q9NRC9, O14829, Q9NYV8, Q9NYW3, Q15835, P12271, O95918, Q8TDN2, O43186, P18545, Q8NFM1, Q9Y585, Q9NZW4, O00294, P10745, P53674, P30301, P22607, P43681, O00222, P51172, P35372, P26998, O15399, Q9UGF7, Q9H255, P41146, P82279, Q12837, P05813, P28223, P10828, P15313, Q15613, P08100, Q03395, P10588, P51160, P47804, P36575, Q9NYV7, Q3SYG4, P03999, O95237, O76002, Q92903, Q9Y5Y9, P11488, P48431, P26374, Q9Y3N9, O75916, O75083, Q9UI40, Q17R60, O14581, O60938, P14416, P51170, P43320, Q16281, P58173, P47881, Q9Y5M6, O43749, P28476, P43080, Q9NYW1, Q12791, P17787, O43789, P16499, P23760, P47890, O14926, P78424, P02452, P23415, P58182, O60404,

P14138, P13942, P35913, Q9UKL2, P19087, Q13507, Q5T4F7, P47887, P23942, Q9Y6H8, Q9UGM1, Q01955, O60403, Q13224, Q16518, Q13607, O75445, Q9NYV9, P31025, O76099, O75106, P47874, P29973, O15537, P02489, Q13956, O60840, O95500, P02753, Q9HC10, Q8N196, P22748, O43636, Q15618, P35243, P78363, O00295, P56373, P49335, P53673, P41145, Q96R84, P37088, P56693, O95834, P51841, P34982, P56696, P35240, Q9UBY8, Q14831, Q9GZU5, Q9NYW0, P54845, O60721, O15492, P28335, Q9NYW6, O75762, O14830, Q12879, Q13402, O60220, P20941, Q9NQN1, Q13606, P57727, Q9UKL4, P07320, P15382, Q02846, Q15319, O95222, Q14573

-- 34 of 2799--

GOID GO:0048869

TERM cellular developmental process

P-VALUE 6.27122973507391e-12

CORRECTED P-VALUE 1.75531720284719e-08

NUM\_ANNOTATIONS 304 (of 1935)

ANNOTATED\_GENES Q99584, Q02962, Q01534, Q06710, Q12959, O95631, P53667, P09544, Q14469, O15353, O43186, Q96J94, P02818, Q15465, Q16568, Q99581, P15923, P31270, P13497, O43897, Q8WZ75, O95948, P31213, Q16620, P32238, Q99453, P01588, Q12837, Q9NR12, P12821, Q13214, Q6UXY1, O60663, P20809, P21728, Q9C019, Q02548, P06401, P48742, O14788, Q05066, P61812, P21359, P15311, Q59GJ8, P02649, A0PK02, Q00653, P78504, O15522, Q13467, O95365, O15146, P60953, P51843, P25874, P28358, Q9UL68, Q9BRP0, P50553, P56703, Q14DW8, O75326, Q86VD1, A1A4U0, O95390, O15178, Q15768, O95947, P19622, O95185, O95754, Q9H2A3, P14138, O94788, P16150, Q5T4F7, Q9HAV5, Q68CZ1, O00526, Q14993, O60312, O75093, Q13972, Q3ZCU4, Q06455, Q16518, O75445, Q02577, Q9P2T0, P11831, Q14318, P01127, O00238, Q92563, Q01726, P47928, Q5UIP0, P52594, Q9H5I1, P49335, P10070, O95025, P36896, P07359, P18075, O60890, Q04721, P27037, Q8TC59, Q13705, P08151, P31273, P22003, Q8IYT8, P41743, O76093, P15863, O00555, Q00597, P98177, Q16254, P30048, Q12879, P55895, O14786, Q03431, Q9NWH7, Q13402, P17677, O60383, P62263, P62988, P11487, P08620, Q13117, O75094, P12035, Q99626, Q14093, Q07687, Q86YV9, Q15319, Q5JQC9, Q92786, O95259, O94887, O43316, Q15306, O15524, O00203, P09067, P01730, Q9NYL2, P27216, Q15835, P15291, P53805, P36897, Q13285, P25054, P30988, Q9Y236, Q14623, P10747, Q14990, Q9HCT0, P10767, P10071, P28370, P52945, Q99750, P82279, O15085, P35663, P14921, Q9Y463, P10828, P53708, P17542, P10588, A2NWD3, Q15784, Q13939, O14514, P98172, Q9Y698, Q9GZV9, P56706, Q3SYG4, Q03181, Q16650, Q01538, Q13950, P25391, P41586, P33681, P12645, P48431, Q9UJU5, Q14012, O75829, Q08289, O43184, Q9NS25, O60248, O43439, P14416, Q13485, P49640, O75602, P61296, Q12791,

Q9HBE4, O60609, P78362, P17787, Q86YL7, O15156, Q15303, O00755, Q03052, O60462, Q05952, Q13461, Q02297, O00115, P50148, P78424, Q07352, Q8NIFY4, Q12824, Q14190, Q08188, Q9UHL0, Q9Y261, O14543, P18206, Q5FVE4, O43312, P32856, P23769, P10276, A0PJG1, Q9H3Q1, O96004, P43146, P06340, P47989, P35221, Q13769, Q92838, O00468, P52803, O95183, P31249, Q01196, Q8N196, P05556, P34820, P26441, O60344, Q12955, P05111, O14813, O75553, P32297, O43711, P56693, Q02643, Q9UBY8, P35240, Q13501, P08588, Q9H2C1, P51679, P09603, O75360, P54845, Q6NT51, P56178, P55347, Q15078, Q14576, Q9H7Z6, Q9Y6L7, Q9BXA7, O00634, P24385, P04628, Q06945, O75603, Q9H295, Q5VVV10, Q02575, O43248, Q96PF2, O15296, P15382, O00144, P22301, Q99835, O43763, Q9UBC0

-- 35 of 2799--

GOID GO:0003002

TERM regionalization

P-VALUE 2.26418246769208e-11

CORRECTED P-VALUE 6.33744672707014e-08

NUM\_ANNOTATIONS 56 (of 203)

ANNOTATED\_GENES Q9Y261, O60663, P09017, O94788, Q9H161, O95813, P09067, P27037, Q68CZ1, Q9H488, P09016, Q13705, P08151, P31273, O75360, P15863, P14651, A1L0T6, Q12849, Q3ZCU4, P36897, P25054, P40425, Q15465, P17509, Q13485, P04628, P46109, Q14318, O75593, O00238, P31249, P28358, P31270, P11487, Q06587, P10071, Q9BRP0, P50222, P35227, Q99750, P17482, Q12870, P56703, Q14DW8, O00755, O43248, Q13635, O95390, O15178, Q07687, Q9H2H0, P10070, P31267, Q99835, Q14142

-- 36 of 2799--

GOID GO:0019933

TERM cAMP-mediated signaling

P-VALUE 3.60704539680508e-11

CORRECTED P-VALUE 1.00961200656574e-07

NUM\_ANNOTATIONS 32 (of 83)

ANNOTATED\_GENES P43220, P49146, Q9Y5Y4, P30874, Q03431, P47871, Q02643, P46089, P08172, O95838, P25100, P47211, P21728, P08588, P35368, P21918, P34947, P34998, P32245, P41146, Q13324, P08912, O00230, P41143, P34969, P50148, Q08116, P13945, P30988, P41145, P01286, O43603

-- 37 of 2799--

GOID GO:0007188

TERM G-protein signaling, coupled to cAMP nucleotide second messenger

P-VALUE 4.25878778785632e-11  
CORRECTED P-VALUE 1.19203470182098e-07  
NUM\_ANNOTATIONS 31 (of 79)  
ANNOTATED\_GENES P49146, Q9Y5Y4, P30874, Q03431, P47871, Q02643,  
P46089, P08172, O95838, P25100, P47211, P21728, P08588, P35368, P21918, P34947,  
P34998, P32245, P41146, Q13324, P08912, P41143, O00230, P34969, P50148,  
Q08116, P13945, P30988, P41145, P01286, O43603

-- 38 of 2799--

GOID GO:0007389

TERM pattern specification process

P-VALUE 9.53979550627809e-11

CORRECTED P-VALUE 2.67018876220724e-07

NUM\_ANNOTATIONS 68 (of 280)

ANNOTATED\_GENES Q9Y261, P09017, O94788, Q9H161, O60481, P09067,  
Q68CZ1, P09016, A1L0T6, Q3ZCU4, P36897, P25054, Q15465, Q14623, P17509,  
Q14318, O00238, P31270, P31249, Q06587, O95076, P10071, P50222, P35227,  
Q99750, P17482, Q12870, Q13635, Q9H2H0, P10070, P31267, O60663, P18075,  
P78367, P98172, O95813, P27037, Q9H488, Q13705, P08151, P22003, P31273,  
O75360, P15863, P14651, Q12849, P40425, O14786, Q13485, O00587, P04628,  
P46109, O75593, P28358, P11487, Q9BRP0, P50553, P56703, Q99626, Q14DW8,  
O43248, O00755, O15178, O95390, Q07687, Q99835, Q14142, Q14190

-- 39 of 2799--

GOID GO:0007167

TERM enzyme linked receptor protein signaling pathway

P-VALUE 1.19990217228583e-10

CORRECTED P-VALUE 3.35852618022805e-07

NUM\_ANNOTATIONS 95 (of 451)

ANNOTATED\_GENES P49918, P35548, O14543, O15524, P29376, P01730,  
O15198, Q14451, Q9H2X6, O43312, Q12913, P16471, P18545, Q9ULV8, P36897,  
Q8WU20, O00451, P14616, P29320, P12931, O95405, P22607, O75962, O00468,  
P18031, P08922, Q99988, Q9UK05, Q01082, Q13956, P01127, O00238, Q86UT5,  
Q9H0K1, O95948, O60258, Q16620, P53708, P32297, P01286, P36896, A2NWD3,  
P54756, P16234, P51841, Q02643, P18075, O75810, P01225, O95813, P27037,  
Q16671, O43541, Q13705, P23468, O15530, P50052, P61812, Q13950, P17098,  
O76093, P04085, P84022, O00555, Q07889, Q02763, P98177, O75829, Q9P212,  
O15146, O14786, P55107, Q13485, O95297, Q99958, Q15375, O60383, O75593,  
Q9HCN6, O43559, O60262, P49815, Q15303, P21246, P54762, P15514, Q15768,  
Q16478, P54760, P01135, P06213, Q02846, O43318, P25092, Q9UBC0

-- 40 of 2799--

GOID GO:0007165

TERM signal transduction

P-VALUE 1.2829504930199e-10

CORRECTED P-VALUE 3.59097842996269e-07

NUM\_ANNOTATIONS 754 (of 5693)

ANNOTATED\_GENES O95944, Q9Y4I4, P50391, O15130, P01258, Q9NP86, O60906, P32302, Q9NYW3, P30872, O95755, Q13283, O75578, P01574, Q8NG66, P98161, P52824, P21980, Q07666, Q9Y6J3, Q16568, O00451, Q9Y576, O14654, P09681, Q8WUA7, Q01082, Q9NYZ4, Q15759, Q8NEB9, O14497, Q86UT5, O15399, Q9H255, O60258, P49802, P22105, Q16620, P32238, P48169, Q99445, P25942, P30989, P42684, Q04844, Q15382, P29371, P08173, O14544, Q68DL5, P50453, Q6UXY1, P20809, Q99742, Q9NYV7, O75448, P46093, O75787, P11488, P21359, O60755, O43898, P78504, O75916, P41180, Q13467, P34995, P01374, Q99958, O95297, P51178, P29762, Q3KR16, A4FU63, P47881, Q9HCN6, O60726, O75469, Q9UBT3, P50553, P28476, P43080, O43789, P54762, P49286, P15514, P01135, P17181, Q92772, P49918, P32745, P49703, P10826, O94788, P35913, Q9UKL2, P42261, P19087, Q68CZ1, O00409, Q01955, P25098, Q13224, Q05513, Q13972, O43612, Q9NYV9, P29320, O00329, P46089, Q14968, P08922, P18031, P51685, O00325, Q13956, O00238, Q86T24, O15519, Q15618, Q13255, Q01726, P49685, Q9UQ52, O95081, P02748, P51149, Q99928, P56373, P57058, Q9H2H0, P10070, Q06481, Q4KMP7, P41145, P01286, Q6ZT07, P47900, Q13163, Q04721, Q9P1P5, O95838, O43813, Q08AM6, Q9H488, P11215, P35348, Q13705, Q13477, P47872, P08151, P41587, Q9NYW0, Q8IYT8, P21796, P48039, O00555, P23508, P98177, Q9UBU2, P40238, Q12879, Q14512, P53041, O95672, P28221, Q96RI0, O60883, O15547, O75928, P11487, P08620, O60242, O60262, P32245, Q05BE4, Q6NV75, Q13077, Q9UPW8, Q16566, P37288, O75144, Q5JQC9, O94887, O14511, A0JLP1, O96013, P23497, P01563, P09758, Q13114, P32971, P01730, Q9NYL2, Q9NYV8, Q9H2X6, Q12913, P47898, Q15835, Q14641, Q9UEE5, O43324, P49796, P12872, P53805, Q13285, P30988, P25054, P00797, Q8WU20, P21731, O95405, O15055, O00522, Q99988, Q9P2N2, P10767, P10071, Q6NTB5, P35372, P41146, P52564, O43193, O15376, P34969, P28223, P19235, P08514, Q15771, Q14432, O75116, Q15613, Q13258, Q13191, P54756, P21781, P41273, O95264, Q01113, Q03181, Q9H252, P12314, O76002, Q16671, O15264, Q9P0X4, Q92903, O96001, Q13950, Q17R43, O00155, P41586, Q15172, Q9UHC6, O00253, P04085, P84022, O14727, O43283, Q02763, O15013, P49146, O14581, Q13609, Q9UQ05, A1E5M1, P47775, Q13485, P14416, O95202, Q15761, P13631, Q9HBE4, P78362, P17787, Q13324, Q15303, P10082, O75901, P34903, O60229, P18428, O75325, O15198, P25103, Q14451, P47887, O43312, P16471, P42127, Q9UBF8, Q04912, O95759,

P41594, P61106, P19174, P12931, Q92838, P47874, P47871, Q5IFH6, P26441, Q13237, Q9H0K1, P52701, Q9NPB3, P05111, P11473, Q13635, Q15825, Q13370, O43613, O43424, Q9NQ87, P20340, O95389, Q14738, O43295, Q17R89, P62942, P47211, Q9NS66, Q15208, P51679, O95158, Q14831, Q9H3V2, O75360, P46092, O14684, Q1ZYL3, Q13886, O15492, P17405, P30874, P08949, P24385, P02760, P30968, P04628, P25100, O75593, P35368, P32298, Q99677, O00574, Q9Y264, O00254, O75078, O60244, Q16478, P41968, Q99835, Q9UBC0, Q15750, Q15555, O60266, P22888, Q14164, O43182, P53667, P09544, P29376, Q14416, Q00722, Q04864, O43687, O95918, P46094, Q96G91, O43614, Q15404, Q15465, P51582, P01350, Q9UHD0, P22607, P80098, P43681, P08700, O95948, P42701, Q14123, P01588, O94810, Q14236, O75581, Q9Y2I9, P08100, P51160, P47804, P36575, P01225, O60921, P21728, P03999, P33765, O14804, O14924, O76036, O43541, P40933, P23468, P06401, Q9NS67, P34998, P28336, O00561, P61812, Q59GJ8, P02649, Q9Y3N9, P49758, P20800, P35225, O75388, Q9HCQ7, Q05586, P43487, Q08722, Q00653, Q8NC01, P60893, P22466, O15146, P60953, Q9BU20, P51843, Q96PG8, Q9UK32, Q16281, P57789, Q9NYW1, Q8IXF0, P56703, P16499, P08912, P47890, O15178, P21246, Q15768, P27815, P54760, P58182, Q6UWB1, Q13177, O95185, O15350, P14138, Q15907, P14619, P16150, Q5T4F7, Q9HAV5, Q6ZW31, P42263, Q99963, O43147, Q01362, O60447, O94989, Q9Y2Y0, Q9UBG7, Q3ZCU4, Q13607, Q9HB89, Q07890, P49137, P80192, O76099, Q02833, O43251, Q01064, Q14318, P01127, P09471, P16520, O43192, P51671, P35243, Q9NXL2, O75889, P52594, Q93098, Q12852, P21554, P13945, O14990, O15259, Q96R84, P36896, Q9BXL6, P07359, P10114, P51841, P18075, O75810, O60890, P27037, P36406, P62753, Q14571, Q7Z4W6, P34947, P50052, P41743, Q99490, O76093, Q13554, P13688, Q12802, Q15762, Q07889, Q9NYW6, Q9GZY6, Q03431, O75628, O14786, P55211, Q15120, P55107, Q13795, P17677, O60383, O43741, Q99061, P55196, O43559, Q9H3D4, O00178, P23416, O14939, Q13572, Q13393, P04818, Q13606, O75783, O95259, O95222, Q9HCR9, Q01344, P26012, P30550, Q14155, O15524, O75952, Q8N6U8, Q8WXH6, Q9BZC5, Q93097, Q9Y2B4, O75023, P18545, Q9UGP4, P63211, Q9ULV8, P46091, P30939, Q9Y585, P36897, P41970, Q15077, P43220, O75161, P06748, Q9GZP7, P28908, Q13671, O75962, Q14623, P47901, P10747, P08172, Q9UK05, Q5UAW9, O00222, Q08462, Q9H160, Q8WXV1, P22736, A0JNU9, O95157, Q9Y2X0, P30542, P52945, Q9UGF7, Q99750, Q07912, O75761, O43734, O15085, P78314, P53708, P05067, P10588, A2NWD3, Q13003, O14843, P34981, Q15654, O14514, O95813, P56706, P50406, Q05901, O15530, P47992, P25391, O95477, P33681, O95800, O43194, Q13087, Q14012, Q13639, O75829, O60519, P21452, Q02779, Q02156, O14733, O95835, Q15375, P58173, O60503, Q6GQQ9, Q14168, O43749, P49682, P35858, O60609, P49815, Q86YL7, P62805, O00755, A1L156, O00590, Q14CE0, O15484, P10911, Q02297, P50148, P05106, P06213, O00459, P25092, O15397, P52757, O15516, P39086, P23415,

Q14190, P28222, Q13835, Q9Y5Y4, P35548, O60404, P23945, O14543, Q13188, Q9Y3Y4, Q15628, P28472, P21918, P04808, P32856, P10276, Q9NTG1, P56559, Q13002, P42830, Q13588, P12757, Q04724, O60403, Q16099, Q08830, P36405, Q8NI35, Q9H3Q1, P51451, Q08116, Q15822, O00175, P35221, O43603, O75343, P14616, O00468, P05556, P01222, P50150, P00709, O14836, P61225, O95996, Q12955, O43555, Q9NZD1, P31391, O00230, A4QMS5, Q15139, P25021, Q13459, P32297, P35219, Q9Y478, P16234, P34982, Q02643, P49810, P33032, P48058, P35240, Q13501, P08588, Q9H0E9, P01031, O95136, Q9BRG2, Q5JPD2, P17098, P47870, P50570, P28335, O60725, Q15078, P48546, Q9P212, Q9H596, Q01718, P46109, Q06945, P31644, Q00005, P20941, P26992, P04201, Q9UMR5, Q9NQN1, P34972, P48023, P28566, P41143, Q15057, P32247, O00144, P22301, Q13797, Q02846, O43318, P32970, Q14573

-- 41 of 2799--

GOID GO:0042127 & cell proliferation

TERM regulation of cell proliferation

P-VALUE 2.91862780650428e-10

CORRECTED P-VALUE 8.16923923040549e-07

NUM\_ANNOTATIONS 130 (of 696)

ANNOTATED\_GENES P42771, O95631, P09544, Q00577, Q14469, Q9BZS1, P56545, P30872, O43324, P15248, P01574, P15291, P21980, P36897, P25054, Q15465, P06748, P28908, Q14623, P10747, P08700, P10071, P35372, P52945, P42701, O60258, Q99445, P01588, P14921, P28223, A2NWD3, P21781, P20809, P98172, O14514, O95813, P40933, P61812, Q13950, P21359, P25391, P02649, P20800, Q05215, P04085, P98088, Q08722, O15522, P22466, P01374, P14416, Q13485, Q9BRP0, P13631, Q9HBE4, P49815, P17787, P49356, O95390, O15178, P21246, Q13461, P01135, O95995, Q969Z0, Q12824, P41235, P32745, P49918, P35548, P14138, Q96IZ0, O94788, P55273, P16150, Q01955, P42830, O95684, Q04912, P51531, O95759, Q14201, P35221, P01127, P02753, P05556, Q8N196, O14683, P35070, P47928, P28069, P31391, Q14004, P01286, Q99801, P16234, Q02643, P18075, Q04721, P35240, O95838, Q9H2C1, P35348, O95136, P09603, P08151, O15540, O76093, Q07011, P56178, P98177, O60725, Q14512, P30048, Q03431, O14786, P30874, P15531, Q14582, Q06945, P25100, P08620, P26992, Q9UMR5, O15296, P22301, O75144, Q92786, Q00987, Q99835

-- 42 of 2799--

GOID GO:0048523

TERM negative regulation of cellular process

P-VALUE 3.01041672904498e-10

CORRECTED P-VALUE 8.4261564245969e-07

NUM\_ANNOTATIONS 262 (of 1675)  
ANNOTATED\_GENES Q02962, Q12959, O43182, P42771, O95631, P01258, P09544, Q00577, Q13105, Q14469, O00198, P30872, O75427, P01574, Q07666, Q15465, P18509, Q16568, Q9Y576, Q6VMQ6, Q01082, P08700, Q15697, Q86UT5, O95948, P49802, Q99445, Q99453, Q14678, O43829, Q12837, O94810, O14544, P50453, P20809, Q99742, Q9NQC7, O60921, Q13813, P98170, O14924, P61812, P21359, P02649, O94776, P49758, P98088, O14753, O43240, P78504, O75916, P63279, O15522, O95365, P22466, Q9BZZ5, Q9BQ70, P01374, P60953, P51843, O95980, O75469, Q9UBT3, Q9BRP0, Q9Y250, P49356, O95390, O95995, P49918, P32745, O14604, O95754, O15350, Q96IZ0, P16150, O00409, Q01955, P25098, Q05513, O00358, Q3ZCU4, O75445, P02489, Q9NP08, O43251, Q9Y294, P01127, O15519, P47928, O00233, Q5UIP0, Q8N6T7, Q9H2H0, P10070, Q9NP71, P36896, P06727, P18075, Q04721, P54259, P35348, P50052, P31273, O15540, Q8IYT8, Q07011, O00555, P23508, P09327, P98177, Q9UBU2, P30048, Q14512, O75366, Q8NFZ8, O14786, Q03431, Q15406, O43593, O60383, P62263, P08620, Q9H3D4, Q01094, P48380, O14939, Q07687, Q13506, Q92786, P51786, P23497, Q9Y2Y4, O15524, P56545, Q9BZS1, P05154, P10827, Q8WYB5, O43324, Q9Y2B4, P15291, P49796, P08910, P53805, Q9ULV8, P36897, P16989, P41970, P25054, P06748, P28908, Q14623, P10747, O00222, Q9UK05, P10071, P35227, P35372, P52945, Q99750, P14921, P28223, Q13191, A2NWD3, Q13003, P78367, O14514, O95813, O75896, Q03181, O75446, Q13950, P48431, Q9Y6E7, Q9UJU5, P84022, P04085, O75829, O60519, P49454, P11137, O43439, O60248, O95835, P14416, Q13485, Q9Y2Y8, P13631, Q6GQQ9, P23759, P49815, P52907, Q02297, O00459, Q12824, P23415, Q14190, P41235, P35548, Q9Y261, O14543, P18206, P55273, Q96JB3, Q12981, O43312, P16471, P15056, P02768, Q04724, Q15466, P51531, Q08116, O96004, P43146, Q14201, P35221, Q13769, P02753, P05556, Q8N196, O95125, P50150, O14683, P52701, P11473, P05111, P28069, P31391, Q13635, P62714, O43711, Q99801, O75414, O00488, P35240, Q9UBY8, P47756, O75360, P17098, Q6NT51, O15492, A2RRE3, P28335, Q01658, Q9H7Z6, P30874, P15531, Q14582, P02760, Q06945, O75593, P35368, O75603, O00425, O15296, P22301, Q00987, Q99835, O43763, Q9UBC0, Q9NRC6

-- 43 of 2799--

GOID GO:0042127

TERM &regulation of cell proliferation

P-VALUE 5.00704490381424e-10

CORRECTED P-VALUE 1.40147186857761e-06

NUM\_ANNOTATIONS 137 (of 751)

ANNOTATED\_GENES P30550, P42771, O95631, P09544, Q00577, Q14469, Q9BZS1, P56545, P30872, O43324, P15248, P01574, P15291, P21980, P36897,

P25054, Q15465, P06748, P28908, Q14623, P10747, P08700, P10071, P35372, P52945, P42701, O60258, Q99445, P01588, P14921, P28223, A2NWD3, P21781, P20809, P98172, O14514, O95813, P40933, P61812, Q13950, P21359, P25391, P02649, P20800, Q05215, P04085, P98088, Q08722, Q02763, P78504, O15522, P22466, P01374, P14416, Q13485, Q9BRP0, P13631, Q9HBE4, P49815, P17787, P49356, O95390, P21246, O15178, Q13461, P01135, O95995, Q969Z0, Q12824, P41235, P32745, P49918, P35548, P14138, Q96IZ0, O94788, P55273, P16150, Q01955, P42830, O95684, Q04912, P51531, O95759, Q14201, P35221, O43251, P01127, P02753, P05556, Q8N196, O14683, P35070, P47928, P05111, P28069, P31391, Q14004, P01286, Q99801, P16234, Q02643, P18075, Q04721, O95838, P35240, Q9H2C1, P35348, O95136, P09603, P08151, O15540, O76093, Q07011, P56178, P98177, Q16254, O60725, Q14512, P30048, Q03431, O14786, P30874, P15531, Q14582, Q06945, P25100, P08620, P26992, Q9UMR5, O15296, P22301, O75144, Q92786, Q00987, Q99835, Q9GZZ6

-- 44 of 2799--

GOID GO:0000003

TERM reproduction

P-VALUE 5.39326418392345e-10

CORRECTED P-VALUE 1.50957464508017e-06

NUM\_ANNOTATIONS 139 (of 766)

ANNOTATED\_GENES P22888, P10323, O95972, Q01534, P20742, P01258, P09544, P01730, Q96S53, P56545, Q9H2X6, P05154, Q14641, O95918, Q15431, Q96J94, P01574, O00308, P15291, P16989, P36897, Q13285, Q15465, P18509, Q9Y576, Q9Y236, Q14990, P10747, Q15414, P31213, P11464, P01588, P35663, P54107, P19235, Q14507, Q13939, O43196, P01225, P49916, P21728, Q14565, Q03181, Q02548, Q16671, O43506, Q15067, P06401, O60423, P34998, Q05066, O15457, P41586, P14902, P51610, P84022, P15289, O14753, P37058, Q9NS25, O14599, O60248, P16104, P51843, O95450, P38567, Q15223, O75602, P05362, Q8IXF0, Q86VD1, O00755, Q05952, P06213, Q12824, Q92772, P23415, P23945, Q9UHL0, O75508, Q5FVE4, Q02383, P04808, P32856, Q9NTG1, P16471, P04090, O95072, Q04912, Q12889, P47989, O75575, Q02577, O76099, Q9P2T0, P29973, O75031, O00238, P02753, P05556, Q8N196, P49638, P08842, P05111, P52594, P41145, P16234, Q02643, Q96L21, P27037, Q08648, Q8TC59, P08151, Q12816, Q99645, P22612, Q6T1H8, P48039, Q13886, Q00597, P55285, Q96BH3, Q9BXA7, Q15406, Q99865, Q9NWH7, P02760, Q9Y5K1, O60383, Q5T230, Q13117, O00574, P35527, Q14093, P63241, Q96PF2, P55789, Q9UKF5, Q5JQC9

-- 45 of 2799--

GOID GO:0006357

TERM regulation of transcription from RNA polymerase II promoter

P-VALUE 6.78232756038874e-10

CORRECTED P-VALUE 1.89837348415281e-06

NUM\_ANNOTATIONS 132 (of 719)

ANNOTATED\_GENES P51786, P23497, Q9Y2Y4, Q02962, Q06710, Q14469, P05549, O15353, Q7KZ85, P10827, O43186, P16989, Q13285, Q9Y2D1, Q15465, P04198, Q14623, Q6VMQ6, P22736, P35227, Q15697, Q9Y2X0, P52945, O95948, Q99750, Q12870, O14647, P52747, O43829, P01588, Q12837, P14921, O75486, Q15784, Q99742, P20809, Q03181, Q16650, O75446, Q13950, O43435, Q12873, P48431, O94776, Q9UJU5, Q02446, Q05586, P84022, O14753, Q9Y651, O95365, P40425, Q9BQ70, Q16552, O60248, P51843, O75528, Q13485, P49640, P28358, P61296, P13631, P50553, Q16656, O15178, O15370, P19419, O15516, Q12824, Q14190, P41235, Q9Y261, Q6UUV9, Q96IZ0, Q9H2A3, Q9H161, O75333, P23769, P41223, Q15466, Q10587, P51531, O00358, Q3ZCU4, O96004, Q96GM5, Q9H944, O00468, P11831, Q01196, O95125, Q96KN3, P47928, P10070, Q9NP71, P56693, Q92481, P18075, O00488, P54259, Q9Y6J9, Q13501, Q9H0E9, P08151, P31273, O75360, P17098, P54845, Q6NT51, P15863, Q13886, P55347, A2RRE3, Q01658, Q16254, P20823, Q15406, Q14582, P62263, O75593, Q5T230, Q01094, Q14541, Q5VVI0, O60244, O95163, Q07687, Q14241, Q00987, Q15319, Q9UBC0, P51532

-- 46 of 2799--

GOID GO:0048519

TERM negative regulation of biological process

P-VALUE 1.03120518491256e-09

CORRECTED P-VALUE 2.88634331257026e-06

NUM\_ANNOTATIONS 277 (of 1813)

ANNOTATED\_GENES Q02962, Q12959, O43182, P42771, O95631, P01258, P09544, Q00577, Q13105, Q14469, O00198, P30872, O75427, Q96J94, P01574, Q07666, Q15465, P18509, Q16568, Q9Y576, Q6VMQ6, P00748, Q01082, P08700, Q15697, Q86UT5, O95948, P49802, Q99445, Q99453, Q14678, O43829, P03952, Q12837, O94810, O14544, P50453, P20809, Q99742, Q9NQC7, O60921, Q13813, P21728, P98170, O14924, P61812, P21359, P02649, O94776, P49758, P98088, O14753, O43240, P78504, O75916, P63279, O15522, O95365, P22466, Q9BZZ5, Q9BQ70, P01374, P60953, P51843, O95980, O75469, Q9UBT3, Q9BRP0, Q9Y250, P49356, O95390, O95995, P49918, P32745, O14604, Q6UWB1, O95754, O15350, Q96IZ0, P16150, O00409, Q01955, P25098, Q05513, O00358, Q3ZCU4, O75445, P02489, Q9NP08, O43251, Q9Y294, P01127, O15519, P47928, O00233, Q5UIP0, Q8N6T7, Q9H2H0, P10070, Q9NP71, P36896, P06727, P07359, P18075, Q04721, P54259, P35348, P50052, P31273, O15540, Q8IYT8, Q07011, O00555, P23508, P09327, P98177, Q9UBU2, P30048, Q12879, Q14512, O75366, Q8NFX8, O14786,

Q03431, Q15406, O43593, O60383, P62263, P08620, Q9H3D4, Q01094, P48380, O14939, Q07687, Q13506, Q92786, P51786, P23497, Q9Y2Y4, Q9UL18, O15524, Q9BZS1, P56545, P05154, P10827, Q8WYB5, O43324, Q9Y2B4, P49796, P15291, Q9ULV8, P08910, P53805, P36897, P16989, P41970, P25054, P30988, P06748, P28908, Q14623, P10747, Q9UK05, O00222, P10071, P35227, P35372, P52945, Q99750, P14921, P28223, Q13191, A2NWD3, Q13003, P78367, O14514, O95813, O75896, Q03181, O75446, Q13950, P48431, Q9Y6E7, Q9UJU5, P84022, P04085, O75829, O60519, P49454, P11137, O43439, O60248, O95835, Q13485, P14416, Q9Y2Y8, P13631, Q6GQQ9, Q12791, P23759, P49815, P52907, Q02297, O00459, Q12824, P23415, Q14190, P41235, P35548, P18428, Q9Y261, O14543, P18206, P55273, Q96JB3, Q12981, O43312, P10276, P16471, P15056, P02768, Q04724, Q15466, P51531, Q08116, O96004, P43146, Q14201, P35221, Q13769, P02753, P05556, Q8N196, O95125, P50150, O14683, P52701, P11473, P05111, P28069, P31391, Q13635, P62714, O43711, Q99801, O75414, O00488, P35240, Q9UBY8, P08588, P47756, O75360, P17098, P03951, Q6NT51, O15492, A2RRE3, P28335, Q01658, Q9H7Z6, P30874, P15531, Q14582, P02760, Q06945, O75593, P25100, P35368, O75603, O00425, O15296, P22301, Q00987, Q99835, O43763, Q9UBC0, Q9NRC6

-- 47 of 2799--

GOID GO:0007610

TERM behavior

P-VALUE 1.09244850556525e-09

CORRECTED P-VALUE 3.05776336707712e-06

NUM\_ANNOTATIONS 96 (of 476)

ANNOTATED\_GENES Q9BXM0, Q9Y5Y4, P50391, P14138, P42261, P25103, P16150, P42830, P42127, P46094, Q13224, Q13972, O43614, P25189, O43612, P41594, O00175, O43603, Q16568, Q02577, O75161, P43220, P80098, P43681, P51685, Q01064, P01127, P35372, P51671, O15399, Q12870, P32238, P30989, P56373, P28223, P21554, O43613, P53708, P32297, P41145, O15259, Q15784, Q9Y277, Q99742, P17900, Q9UBY8, P21728, P51679, P01031, Q14831, P50052, P34998, O96001, P61812, P47992, P21359, O60755, P48039, P46092, P20800, O00253, P04085, O00555, Q05586, Q08828, P28335, P41180, P22466, Q12879, P49146, P14416, P31644, P28358, P35368, P49682, Q12791, O60262, P34972, Q8IXF0, P32245, Q13393, P49815, P17787, P10082, P41143, O00590, P21246, P37288, Q15768, P32247, P50148, P22301, O00144, O15467, O75973, P23415

-- 48 of 2799--

GOID GO:0022414

TERM reproductive process

P-VALUE 1.22201410395034e-09  
CORRECTED P-VALUE 3.42041747695699e-06  
NUM\_ANNOTATIONS 137 (of 761)  
ANNOTATED\_GENES P22888, P10323, O95972, Q01534, P20742, P01258, P09544, Q96S53, P56545, Q9H2X6, P05154, Q14641, O95918, Q15431, Q96J94, P01574, O00308, P15291, P16989, P36897, Q13285, Q15465, P18509, Q9Y576, Q9Y236, Q14990, P10747, Q15414, P31213, P11464, P01588, P35663, P54107, P19235, Q14507, Q13939, O43196, P01225, P49916, P21728, Q14565, Q03181, Q02548, Q16671, O43506, Q15067, P06401, O60423, P34998, Q05066, O15457, P41586, P14902, P51610, P84022, P15289, O14753, P37058, Q9NS25, O14599, O60248, P16104, P51843, O95450, P38567, Q15223, O75602, P05362, Q8IXF0, Q86VD1, O00755, Q05952, P06213, Q12824, Q92772, P23415, P23945, Q9UHL0, O75508, Q5FVE4, P04808, P32856, Q9NTG1, P16471, P04090, O95072, Q04912, Q12889, P47989, O75575, Q02577, O76099, P29973, Q9P2T0, O75031, O00238, P02753, P05556, Q8N196, P49638, P08842, P05111, P52594, P41145, P16234, Q02643, Q96L21, P27037, Q08648, Q8TC59, P08151, Q12816, Q99645, P22612, Q6T1H8, P48039, Q13886, Q00597, P55285, Q96BH3, Q9BXA7, Q15406, Q99865, Q9NWH7, P02760, Q9Y5K1, O60383, Q5T230, Q13117, O00574, P35527, Q14093, P63241, Q96PF2, P55789, Q9UKF5, Q5JQC9

-- 49 of 2799--

GOID GO:0009952

TERM anterior/posterior pattern formation

P-VALUE 3.22892295211838e-09

CORRECTED P-VALUE 9.03775534297936e-06

NUM\_ANNOTATIONS 40 (of 138)

ANNOTATED\_GENES Q9Y261, P09017, O94788, Q9H161, O95813, P27037, P09067, Q9H488, P09016, Q13705, P31273, P15863, P14651, A1L0T6, Q12849, Q3ZCU4, P36897, P25054, Q15465, P17509, Q13485, P04628, P46109, O75593, P31249, P28358, P31270, Q06587, P10071, P50222, P35227, Q12870, P17482, P56703, Q14DW8, O43248, O95390, O15178, P31267, Q14142

-- 50 of 2799--

GOID GO:0045762

TERM positive regulation of adenylate cyclase activity

P-VALUE 3.36560618698561e-09

CORRECTED P-VALUE 9.42033171737273e-06

NUM\_ANNOTATIONS 22 (of 51)

ANNOTATED\_GENES P43220, Q03431, P47871, Q02643, P10323, P46089, P01258, P47211, P21728, P08588, P33765, P21918, P34998, P21359, Q96G91, P34969, P50148, P13945, P30988, P18509, P48546, P01286

-- 51 of 2799--

GOID GO:0009891

TERM positive regulation of biosynthetic process

P-VALUE 3.78457207052581e-09

CORRECTED P-VALUE 1.05930172254017e-05

NUM\_ANNOTATIONS 118 (of 639)

ANNOTATED\_GENES P41235, Q15306, P23497, Q9Y261, Q02962, O15350, Q9H2A3, Q6UUV9, Q06710, Q9H161, Q12951, P01730, P16150, Q9BZS1, Q9H2X6, Q04864, P23769, Q8WYB5, P10827, P15248, O43186, O00358, Q3ZCU4, O96004, Q13285, Q15465, Q96GM5, P28908, Q14623, O00468, Q6VMQ6, P10747, P11831, P15923, Q9Y294, Q9UK05, P01127, Q01196, Q9H160, P08700, P28370, P22736, O14497, Q9UIH9, P52945, O95948, O00233, P28069, O15085, P01588, Q12837, P14921, Q9Y463, P10070, Q9NP71, P01286, P16234, P56693, Q92481, P18075, Q02643, P20809, P21728, Q13501, Q9UMN6, Q16650, P50052, P08151, P61812, Q13950, O75360, O95477, P33681, P48431, P02649, O94776, P54845, P15863, Q9UJU5, Q6NT51, P04085, P84022, Q05586, P55347, P40425, Q9H7Z6, Q16552, P20823, O60248, Q99958, Q13485, P49640, P04628, Q06945, Q9Y2Y8, O75928, O75593, P62988, P28358, Q5T230, Q9H3D4, Q9BRP0, P61296, P13631, P50553, Q9HBE4, P63241, Q5VVI0, O15178, O60244, O76054, P15514, Q07687, P19419, P35680, P22301, P06213, O15516

-- 52 of 2799--

GOID GO:0031281

TERM positive regulation of cyclase activity

P-VALUE 5.2390797717626e-09

CORRECTED P-VALUE 1.46641842811635e-05

NUM\_ANNOTATIONS 22 (of 52)

ANNOTATED\_GENES P43220, Q03431, P47871, Q02643, P10323, P46089, P01258, P47211, P21728, P08588, P33765, P21918, P34998, P21359, Q96G91, P34969, P50148, P13945, P30988, P18509, P48546, P01286

-- 53 of 2799--

GOID GO:0045935

TERM positive regulation of nucleobase, nucleoside, nucleotide and nucleic acid metabolic process

P-VALUE 6.65130229254666e-09

CORRECTED P-VALUE 1.86169951168381e-05  
NUM\_ANNOTATIONS 108 (of 575)  
ANNOTATED\_GENES P41235, Q15306, P23497, Q9Y261, Q02962, O15350, Q9H2A3, Q6UUUV9, Q06710, Q9H161, Q12951, Q9BZS1, Q9H2X6, Q04864, P23769, Q8WYB5, P10827, O43186, O00358, Q3ZCU4, O96004, Q13285, Q15465, Q96GM5, Q14623, O00468, Q6VMQ6, P11831, P15923, Q9Y294, Q9UK05, P01127, Q01196, Q9H160, P08700, P28370, P22736, O14497, Q9UIH9, Q09161, P52945, O95948, O00233, P28069, O15085, P01588, Q12837, P14921, Q9Y463, P10070, Q9NP71, P01286, P16234, P56693, Q92481, Q02643, P18075, P20809, P21728, Q13501, Q9UMN6, Q16650, P08151, Q13950, O75360, O95477, P33681, P48431, P02649, O94776, P54845, P15863, Q9UJU5, Q6NT51, P04085, P84022, Q05586, P55347, P40425, Q9H7Z6, Q16552, P20823, O60248, Q99958, Q13485, P49640, P04628, Q06945, O75928, O75593, P62988, P28358, Q5T230, Q9BRP0, Q9H3D4, P61296, P13631, P50553, Q5VVI0, O15178, O60244, O76054, P15514, Q07687, P19419, P35680, P06213, O15516

-- 54 of 2799--

GOID GO:0010557

TERM +positive regulation of macromolecule biosynthetic process

P-VALUE 7.36168624821614e-09

CORRECTED P-VALUE 2.0605359808757e-05

NUM\_ANNOTATIONS 113 (of 611)

ANNOTATED\_GENES P41235, Q15306, P23497, Q9Y261, Q02962, O15350, Q9H2A3, Q6UUUV9, Q06710, Q9H161, Q12951, P01730, P16150, Q9BZS1, Q9H2X6, Q04864, P23769, Q8WYB5, P10827, P15248, O43186, O00358, Q3ZCU4, O96004, Q13285, Q15465, Q96GM5, P28908, Q14623, O00468, Q6VMQ6, P10747, P11831, P15923, Q9Y294, Q9UK05, P01127, Q01196, Q9H160, P08700, P28370, P22736, O14497, Q9UIH9, P52945, O95948, O00233, P28069, O15085, P01588, Q12837, P14921, Q9Y463, P10070, Q9NP71, P01286, P16234, P56693, Q92481, P18075, P20809, Q13501, Q9UMN6, Q16650, P08151, P61812, Q13950, O75360, P33681, P48431, O94776, P54845, P15863, Q9UJU5, Q6NT51, P04085, P84022, Q05586, P55347, P40425, Q9H7Z6, Q16552, P20823, O60248, Q99958, Q13485, P49640, P04628, Q06945, Q9Y2Y8, O75928, O75593, P62988, P28358, Q5T230, Q9BRP0, Q9H3D4, P61296, P13631, P50553, Q9HBE4, P63241, Q5VVI0, O15178, O60244, O76054, P15514, Q07687, P19419, P35680, P22301, P06213, O15516

-- 55 of 2799--

GOID GO:0010557 + macromolecule biosynthetic process

TERM positive regulation of macromolecule biosynthetic process

P-VALUE 7.36168624821614e-09

CORRECTED P-VALUE 2.0605359808757e-05  
NUM\_ANNOTATIONS 113 (of 611)  
ANNOTATED\_GENES P41235, Q15306, P23497, Q9Y261, Q02962, O15350, Q9H2A3, Q6UUUV9, Q06710, Q9H161, Q12951, P01730, P16150, Q9BZS1, Q9H2X6, Q04864, P23769, Q8WYB5, P10827, P15248, O43186, O00358, Q3ZCU4, O96004, Q13285, Q15465, Q96GM5, P28908, Q14623, O00468, Q6VMQ6, P10747, P11831, P15923, Q9Y294, Q9UK05, P01127, Q01196, Q9H160, P08700, P28370, P22736, O14497, Q9UIH9, P52945, O95948, O00233, P28069, O15085, P01588, Q12837, P14921, Q9Y463, P10070, Q9NP71, P01286, P16234, P56693, Q92481, P18075, P20809, Q13501, Q9UMN6, Q16650, P08151, P61812, Q13950, O75360, P33681, P48431, O94776, P54845, P15863, Q9UJU5, Q6NT51, P04085, P84022, Q05586, P55347, P40425, Q9H7Z6, Q16552, P20823, O60248, Q99958, Q13485, P49640, P04628, Q06945, Q9Y2Y8, O75928, O75593, P62988, P28358, Q5T230, Q9BRP0, Q9H3D4, P61296, P13631, P50553, Q9HBE4, P63241, Q5VVI0, O15178, O60244, O76054, P15514, Q07687, P19419, P35680, P22301, P06213, O15516

-- 56 of 2799--

GOID GO:0051239

TERM &regulation of multicellular organismal process

P-VALUE 7.53780611851209e-09

CORRECTED P-VALUE 2.10983193257153e-05

NUM\_ANNOTATIONS 130 (of 732)

ANNOTATED\_GENES Q15306, O95631, P53667, O00203, P01258, P01730, Q14469, P23582, Q9BZS1, Q04864, P10827, P15248, O43186, P30988, Q15465, Q16568, Q14500, P43220, Q9Y576, P28908, Q14623, P00748, P10747, P08172, Q99453, P03952, P14921, P28223, P10828, P12821, Q13003, P56706, P21728, O75787, P33765, O14788, P61812, Q13950, P21359, P33681, P02649, Q02446, P20800, P04085, A0PK02, P84022, P78504, O75829, P24043, P01374, O15146, O60248, P17661, P14416, Q13485, Q9Y2Y8, Q9Y3Q4, P50553, Q12791, Q9HBE4, P17787, A1A4U0, O00755, Q02297, P17181, P23415, P18428, Q9Y261, Q6UWB1, O95754, P14138, Q15628, P16150, P55073, P23769, P10276, Q01955, P25098, Q13002, Q13224, Q13972, Q3ZCU4, P06340, P41594, Q9UJ96, P35221, Q13769, O00468, P11831, P31249, O00238, Q01196, P01127, P02753, P47928, P05111, P56373, Q13635, P36896, P01286, O43711, P07359, Q02643, P18075, P27037, P08588, Q9H2C1, Q13705, P50052, P08151, P03951, Q8IYT8, O00555, P56178, P98177, P28335, Q12879, O14786, P25100, P62988, P35368, P32245, O00425, P15382, Q07687, Q16478, P22301, O43318, Q99835, O43763

-- 57 of 2799--

GOID GO:0051239 & multicellular organismal process

TERM regulation of multicellular organismal process

P-VALUE 7.53780611851209e-09

CORRECTED P-VALUE 2.10983193257153e-05

NUM\_ANNOTATIONS 130 (of 732)

ANNOTATED\_GENES Q15306, O95631, P53667, O00203, P01258, P01730, Q14469, P23582, Q9BZS1, Q04864, P10827, P15248, O43186, P30988, Q15465, Q16568, Q14500, P43220, Q9Y576, P28908, Q14623, P00748, P10747, P08172, Q99453, P03952, P14921, P28223, P10828, P12821, Q13003, P56706, P21728, O75787, P33765, O14788, P61812, Q13950, P21359, P33681, P02649, Q02446, P20800, P04085, A0PK02, P84022, P78504, O75829, P24043, P01374, O15146, O60248, P17661, P14416, Q13485, Q9Y2Y8, Q9Y3Q4, P50553, Q12791, Q9HBE4, P17787, A1A4U0, O00755, Q02297, P17181, P23415, P18428, Q9Y261, Q6UWB1, O95754, P14138, Q15628, P16150, P55073, P23769, P10276, Q01955, P25098, Q13002, Q13224, Q13972, Q3ZCU4, P06340, P41594, Q9UJ96, P35221, Q13769, O00468, P11831, P31249, O00238, Q01196, P01127, P02753, P47928, P05111, P56373, Q13635, P36896, P01286, O43711, P07359, Q02643, P18075, P27037, P08588, Q9H2C1, Q13705, P50052, P08151, P03951, Q8IYT8, O00555, P56178, P98177, P28335, Q12879, O14786, P25100, P62988, P35368, P32245, O00425, P15382, Q07687, Q16478, P22301, O43318, Q99835, O43763

-- 58 of 2799--

GOID GO:0031328

TERM positive regulation of cellular biosynthetic process

P-VALUE 7.99614742575872e-09

CORRECTED P-VALUE 2.23812166446986e-05

NUM\_ANNOTATIONS 116 (of 633)

ANNOTATED\_GENES P41235, Q15306, P23497, Q9Y261, Q02962, O15350, Q9H2A3, Q6UUV9, Q06710, Q9H161, Q12951, P01730, P16150, Q9BZS1, Q9H2X6, Q04864, P23769, Q8WYB5, P10827, P15248, O43186, O00358, Q3ZCU4, O96004, Q13285, Q15465, Q96GM5, P28908, Q14623, O00468, Q6VMQ6, P10747, P11831, P15923, Q9Y294, Q9UK05, P01127, Q01196, Q9H160, P08700, P28370, P22736, O14497, Q9UIH9, P52945, O95948, O00233, P28069, O15085, P01588, Q12837, P14921, Q9Y463, P10070, Q9NP71, P01286, P16234, P56693, Q92481, P18075, Q02643, P20809, P21728, Q13501, Q9UMN6, Q16650, P50052, P08151, Q13950, O75360, O95477, P33681, P48431, P02649, O94776, P54845, P15863, Q9UJU5, Q6NT51, P04085, P84022, Q05586, P55347, P40425, Q9H7Z6, Q16552, P20823, O60248, Q99958, Q13485, P49640, P04628, Q06945, Q9Y2Y8, O75928, O75593, P62988, P28358, Q5T230, Q9H3D4, Q9BRP0, P61296, P13631, P50553, Q9HBE4, P63241, Q5VVI0, O15178, O60244, O76054, P15514, Q07687, P19419, P35680, P06213, O15516

-- 59 of 2799--

GOID GO:0051349

TERM positive regulation of lyase activity

P-VALUE 1.21918809209779e-08

CORRECTED P-VALUE 3.4125074697817e-05

NUM\_ANNOTATIONS 22 (of 54)

ANNOTATED\_GENES P43220, Q03431, P47871, Q02643, P10323, P46089, P01258, P47211, P21728, P08588, P33765, P21918, P34998, P21359, Q96G91, P34969, P50148, P13945, P30988, P18509, P48546, P01286

-- 60 of 2799--

GOID GO:0048598

TERM embryonic morphogenesis

P-VALUE 1.97231667899082e-08

CORRECTED P-VALUE 5.5205143844953e-05

NUM\_ANNOTATIONS 66 (of 303)

ANNOTATED\_GENES P35548, Q9Y261, Q02962, P09017, O94788, Q9H161, Q12951, P09067, Q68CZ1, P09016, Q9UGM1, A1L0T6, O00358, Q3ZCU4, O96004, P36897, Q15465, P17509, P02753, P31270, P31249, O95076, P10071, P35227, P52945, P57082, Q13635, P10070, P53708, P31267, P61968, Q9UHF3, P18075, P56696, P78367, P27037, O95813, Q9C019, P08151, O43435, P48431, P14651, Q12849, P56178, O14727, P40425, Q13402, Q13795, Q13485, P04628, P28358, P08620, Q9BRP0, P13631, P56703, P49815, Q14DW8, O43248, O00755, P35556, O15178, O95947, P50148, Q07687, Q15319, O43763

-- 61 of 2799--

GOID GO:0048705

TERM skeletal system morphogenesis

P-VALUE 2.61834207142796e-08

CORRECTED P-VALUE 7.32873945792686e-05

NUM\_ANNOTATIONS 29 (of 89)

ANNOTATED\_GENES P78367, P17509, Q9H161, P09067, Q9NRC9, O00238, P28358, P31249, P08620, P10767, O95076, P13497, P10071, P09016, P35227, P31273, O43435, P57082, P10827, Q12870, O76093, Q6NT51, P98161, O00755, P14651, A1L0T6, Q07687, P36897, P31267

-- 62 of 2799--

GOID GO:0009790

TERM embryonic development

P-VALUE 2.72541240488347e-08  
CORRECTED P-VALUE 7.62842932126882e-05  
NUM\_ANNOTATIONS 109 (of 597)  
ANNOTATED\_GENES P35548, Q9Y261, Q02962, P09017, O94788, Q9H161, Q12951, P09067, Q9HAV5, Q68CZ1, P09016, Q9UGM1, P23769, P98161, Q13224, A1L0T6, O00358, Q3ZCU4, O96004, P16989, P36897, Q15465, Q14623, P17509, P11831, Q07955, P02753, P31270, P31249, P05556, O95076, P10071, P50222, P35227, P52945, Q99750, P57082, P17482, Q12870, Q13635, P19235, Q9H2H0, P10070, P53708, P31267, P61968, Q9UHF3, P36896, O00482, P56693, O60663, P56696, P18075, P78367, P98172, O60921, O95813, P27037, Q9H488, Q9C019, P08151, P61812, O43435, P25391, Q59GJ8, P48431, P15863, Q9UJU5, P14651, Q12849, P04085, P56178, O14727, P24043, P40425, O60725, Q15078, O14786, Q13402, Q13795, Q13485, P49640, P04628, O75593, P28358, P08620, Q9Y3Q4, Q9BRP0, P61296, P13631, P56703, Q99626, P49815, Q14DW8, P35556, O00755, O43248, O15178, Q07687, P50148, O95947, Q02297, P06213, Q15319, P02452, O43763, O14511, Q12824, Q14190

-- 63 of 2799--

GOID GO:0035270

TERM endocrine system development

P-VALUE 2.99389994486114e-08  
CORRECTED P-VALUE 8.37992594566632e-05

NUM\_ANNOTATIONS 25 (of 70)

ANNOTATED\_GENES Q9Y261, Q02643, P51843, Q06710, P14416, P46109, Q14469, P31249, O75603, P52945, P23769, P08151, O43435, O95948, O75360, P21359, P15863, P14651, O00358, Q13370, P36897, P10070, Q13285, Q9UBC0, P01286

-- 64 of 2799--

GOID GO:0030182

TERM neuron differentiation

P-VALUE 4.52450265727216e-08  
CORRECTED P-VALUE 0.000126640829377048

NUM\_ANNOTATIONS 88 (of 456)

ANNOTATED\_GENES Q9Y261, O95754, Q02962, O95185, Q9H2A3, P14138, O94788, O95631, P53667, Q14469, P23769, Q15835, O43186, O75093, Q13972, Q16518, P36897, P43146, Q15465, O00468, P11831, O00238, P31249, P28370, P10071, O95948, Q12955, Q01726, P47928, P32238, Q99453, O14813, Q12837, P49335, P10070, P32297, P10588, O43711, Q13214, Q15784, O60663, P18075, P98172, O14514, O60890, Q9UBY8, P21728, Q9H2C1, Q16650, P31273, P61812,

Q8IYT8, P48431, P02649, P41743, P54845, P56178, A0PK02, O00555, P78504, O15522, Q15078, O14786, O00634, Q13402, P14416, Q13485, P49640, P17677, P04628, P62988, P28358, O75094, P50553, Q12791, O60609, P17787, A1A4U0, O00755, O60462, Q15768, Q07687, P50148, P19622, Q99835, Q15319, O43763, O94887

-- 65 of 2799--

GOID GO:0009893

TERM positive regulation of metabolic process

P-VALUE 4.79838390275075e-08

CORRECTED P-VALUE 0.000134306765437993

NUM\_ANNOTATIONS 131 (of 762)

ANNOTATED\_GENES Q15306, P23497, Q02962, Q06710, P09544, P01730, Q9BZS1, P51668, Q9H2X6, Q04864, Q15835, Q8WYB5, P10827, P15248, O43186, P36897, Q13285, Q15465, P28908, Q14623, Q6VMQ6, P10747, P15923, Q9UK05, Q9H160, P08700, P28370, P22736, O14497, P52945, O95948, Q07912, O15085, P01588, Q12837, P14921, Q9Y463, P20809, P21728, Q16650, P61812, Q13950, O95477, P33681, P48431, P02649, O94776, Q9UJU5, P04085, Q05586, P84022, P40425, Q16552, O60248, Q99958, Q13485, P49640, Q9Y2Y8, P28358, Q9BRP0, P61296, P13631, P50553, Q9HBE4, O15178, O76054, P15514, P19419, P06213, O15516, P41235, P18428, Q9Y261, Q6UUUV9, Q9H2A3, O15350, Q9H161, Q12951, P16150, P23769, O00358, Q3ZCU4, O96004, Q96GM5, O00468, P11831, Q9Y294, Q01196, P01127, P26441, Q9UIH9, Q09161, O00233, P28069, P10070, Q9NP71, P01286, Q9BXL6, P56693, P16234, Q92481, Q02643, P18075, Q13501, P08588, P05113, Q9UMN6, P50052, P08151, O75360, P54845, Q6NT51, P15863, P55347, P20823, Q9H7Z6, P24385, P04628, Q06945, O75593, O75928, Q5T230, P62988, P35368, Q9H3D4, Q5VVIO, P63241, O60244, P35680, Q07687, P22301

-- 66 of 2799--

GOID GO:0007190

TERM activation of adenylate cyclase activity

P-VALUE 5.0307239829838e-08

CORRECTED P-VALUE 0.000140809964283717

NUM\_ANNOTATIONS 13 (of 22)

ANNOTATED\_GENES P43220, Q02643, P10323, Q96G91, P21728, P33765, P13945, P08588, P18509, P21918, P01286, P34998, P48546

-- 67 of 2799--

GOID GO:0009628

TERM response to abiotic stimulus

P-VALUE 8.61948951281715e-08  
CORRECTED P-VALUE 0.000241259511463752  
NUM\_ANNOTATIONS 69 (of 334)  
ANNOTATED\_GENES Q9BXM0, P35913, P55273, Q9NYL2, O60906, P19087,  
P25103, Q13507, Q9UGM1, Q15835, Q9HBY0, Q13426, P98161, Q13224, P53805,  
P49585, P16989, Q2T9G2, P25189, O00294, Q9Y253, O75161, P02489, P47901,  
Q01064, O60840, A0PJA9, P41181, Q15849, O43636, P51671, P52701, P35243,  
Q01726, P78363, P56373, P08100, O15259, P10588, P47804, P41238, O60921,  
P03999, P21728, P08588, P11488, P21359, P48431, O60721, Q05586, P15289,  
O75762, Q12879, P01374, P55211, P24385, P14416, O95073, P20941, P35368,  
Q86UA6, P43080, Q12791, P17787, P37288, O15229, O75144, P02452, O15516

-- 68 of 2799--

GOID GO:0051254

TERM positive regulation of RNA metabolic process

P-VALUE 1.02134197589707e-07

CORRECTED P-VALUE 0.00028587361905359

NUM\_ANNOTATIONS 88 (of 464)

ANNOTATED\_GENES P41235, P23497, Q9Y261, Q02962, O15350, Q9H2A3,  
Q6UUV9, Q06710, Q9H161, Q12951, Q9H2X6, Q04864, P23769, P10827, O43186,  
O00358, Q3ZCU4, O96004, Q13285, Q15465, Q96GM5, Q14623, O00468,  
Q6VMQ6, P11831, P15923, Q9Y294, Q01196, P28370, P22736, O14497, Q9UIH9,  
Q09161, P52945, O95948, P28069, O15085, P01588, Q12837, P14921, Q9Y463,  
P10070, Q9NP71, P56693, Q92481, P18075, P20809, Q13501, Q9UMN6, Q16650,  
P08151, Q13950, O75360, O94776, P48431, P54845, P15863, Q9UJU5, Q6NT51,  
P84022, Q05586, P55347, P40425, Q16552, P20823, O60248, Q99958, Q13485,  
P49640, P04628, Q06945, O75928, O75593, P28358, Q5T230, Q9BRP0, Q9H3D4,  
P61296, P13631, P50553, Q5VVI0, O15178, O60244, O76054, Q07687, P19419,  
P35680, O15516

-- 69 of 2799--

GOID GO:0010604

TERM +positive regulation of macromolecule metabolic process

P-VALUE 1.14575132557947e-07

CORRECTED P-VALUE 0.000320695796029692

NUM\_ANNOTATIONS 124 (of 722)

ANNOTATED\_GENES P41235, Q15306, P23497, Q9Y261, Q02962, O15350,  
Q9H2A3, Q6UUV9, Q06710, Q9H161, Q12951, P09544, P01730, P16150, Q9BZS1,  
P51668, Q9H2X6, Q04864, P23769, Q8WYB5, P10827, P15248, O43186, O00358,  
Q3ZCU4, O96004, P36897, Q13285, Q15465, Q96GM5, P28908, Q14623, O00468,

Q6VMQ6, P10747, P11831, P15923, Q9Y294, Q9UK05, P01127, Q01196, Q9H160, P08700, P28370, P22736, P26441, O14497, Q9UIH9, Q09161, P52945, O95948, Q07912, O00233, P28069, O15085, P01588, Q12837, P14921, Q9Y463, P10070, Q9NP71, P01286, Q9BXL6, P16234, P56693, Q92481, P18075, P20809, Q13501, Q9UMN6, P05113, Q16650, P08151, P61812, Q13950, O75360, P33681, P48431, P02649, O94776, P54845, P15863, Q6NT51, Q9UJU5, P04085, Q05586, P84022, P55347, P40425, Q9H7Z6, P20823, Q16552, O60248, P24385, Q99958, Q13485, P49640, P04628, Q06945, Q9Y2Y8, O75928, O75593, P62988, P28358, Q5T230, P35368, Q9H3D4, Q9BRP0, P61296, P13631, P50553, Q9HBE4, P63241, Q5VVIO, O15178, O60244, O76054, P15514, Q07687, P19419, P35680, P22301, P06213, O15516

-- 70 of 2799--

GOID GO:0010604 + macromolecule metabolic process

TERM positive regulation of macromolecule metabolic process

P-VALUE 1.14575132557947e-07

CORRECTED P-VALUE 0.000320695796029692

NUM\_ANNOTATIONS 124 (of 722)

ANNOTATED\_GENES P41235, Q15306, P23497, Q9Y261, Q02962, O15350, Q9H2A3, Q6UUV9, Q06710, Q9H161, Q12951, P09544, P01730, P16150, Q9BZS1, P51668, Q9H2X6, Q04864, P23769, Q8WYB5, P10827, P15248, O43186, O00358, Q3ZCU4, O96004, P36897, Q13285, Q15465, Q96GM5, P28908, Q14623, O00468, Q6VMQ6, P10747, P11831, P15923, Q9Y294, Q9UK05, P01127, Q01196, Q9H160, P08700, P28370, P22736, P26441, O14497, Q9UIH9, Q09161, P52945, O95948, Q07912, O00233, P28069, O15085, P01588, Q12837, P14921, Q9Y463, P10070, Q9NP71, P01286, Q9BXL6, P16234, P56693, Q92481, P18075, P20809, Q13501, Q9UMN6, P05113, Q16650, P08151, P61812, Q13950, O75360, P33681, P48431, P02649, O94776, P54845, P15863, Q6NT51, Q9UJU5, P04085, Q05586, P84022, P55347, P40425, Q9H7Z6, P20823, Q16552, O60248, P24385, Q99958, Q13485, P49640, P04628, Q06945, Q9Y2Y8, O75928, O75593, P62988, P28358, Q5T230, P35368, Q9H3D4, Q9BRP0, P61296, P13631, P50553, Q9HBE4, P63241, Q5VVIO, O15178, O60244, O76054, P15514, Q07687, P19419, P35680, P22301, P06213, O15516

-- 71 of 2799--

GOID GO:0031325

TERM positive regulation of cellular metabolic process

P-VALUE 1.27167880080775e-07

CORRECTED P-VALUE 0.000355942896346089

NUM\_ANNOTATIONS 126 (of 738)

ANNOTATED\_GENES P41235, Q15306, P23497, Q9Y261, Q02962, O15350, Q9H2A3, Q6UUV9, Q06710, Q9H161, Q12951, P09544, P01730, P16150, Q9BZS1, P51668, Q9H2X6, Q04864, P23769, Q15835, Q8WYB5, P10827, P15248, O43186, O00358, Q3ZCU4, O96004, Q13285, Q15465, Q96GM5, P28908, Q14623, O00468, Q6VMQ6, P10747, P11831, P15923, Q9Y294, Q9UK05, P01127, Q01196, Q9H160, P08700, P28370, P22736, P26441, O14497, Q9UIH9, Q09161, P52945, O95948, Q07912, O00233, P28069, O15085, P01588, Q12837, P14921, Q9Y463, P10070, Q9NP71, P01286, Q9BXL6, P16234, P56693, Q92481, P18075, Q02643, P20809, P21728, Q13501, Q9UMN6, P05113, Q16650, P50052, P08151, Q13950, O75360, O95477, P33681, P48431, P02649, O94776, P54845, P15863, Q6NT51, Q9UJU5, P04085, Q05586, P84022, P55347, P40425, Q9H7Z6, P20823, Q16552, O60248, P24385, Q99958, Q13485, P49640, P04628, Q06945, Q9Y2Y8, O75928, O75593, P62988, P28358, Q5T230, P35368, Q9H3D4, Q9BRP0, P61296, P13631, P50553, Q9HBE4, P63241, Q5VVI0, O15178, O60244, O76054, P15514, Q07687, P19419, P35680, P06213, O15516

-- 72 of 2799--

GOID GO:0050906

TERM detection of stimulus involved in sensory perception

P-VALUE 1.28822315634524e-07

CORRECTED P-VALUE 0.000360573661461032

NUM\_ANNOTATIONS 23 (of 65)

ANNOTATED\_GENES P47804, Q9NYV7, P35913, O60840, P19087, P03999, O14829, P20941, Q13507, Q9NYV8, O43636, Q9UGM1, P43080, P11488, Q15835, P35243, P78363, P48431, Q13224, P08100, O14830, P10588, O00294

-- 73 of 2799--

GOID GO:0007215

TERM glutamate signaling pathway

P-VALUE 1.42451065743724e-07

CORRECTED P-VALUE 0.000398720533016684

NUM\_ANNOTATIONS 14 (of 27)

ANNOTATED\_GENES Q13003, Q13002, Q16099, Q13224, Q05586, P48058, P50148, O43424, P41594, P42263, P30872, Q15078, Q12879, P39086

-- 74 of 2799--

GOID GO:0045893

TERM positive regulation of transcription, DNA-dependent

P-VALUE 1.50743603187942e-07

CORRECTED P-VALUE 0.00042193134532305

NUM\_ANNOTATIONS 87 (of 461)

ANNOTATED\_GENES P41235, P23497, Q9Y261, Q02962, O15350, Q9H2A3, Q6UUV9, Q06710, Q9H161, Q12951, Q9H2X6, Q04864, P23769, P10827, O43186, O00358, Q3ZCU4, O96004, Q13285, Q15465, Q96GM5, Q14623, O00468, Q6VMQ6, P11831, P15923, Q9Y294, Q01196, P28370, P22736, O14497, Q9UIH9, P52945, O95948, P28069, O15085, P01588, Q12837, P14921, Q9Y463, P10070, Q9NP71, P56693, Q92481, P18075, P20809, Q13501, Q9UMN6, Q16650, P08151, Q13950, O75360, O94776, P48431, P54845, P15863, Q9UJU5, Q6NT51, P84022, Q05586, P55347, P40425, Q16552, P20823, O60248, Q99958, Q13485, P49640, P04628, Q06945, O75928, O75593, P28358, Q5T230, Q9BRP0, Q9H3D4, P61296, P13631, P50553, Q5VVI0, O15178, O60244, O76054, Q07687, P19419, P35680, O15516

-- 75 of 2799--

GOID GO:0009605

TERM response to external stimulus

P-VALUE 1.80935195679642e-07

CORRECTED P-VALUE 0.000506437612707319

NUM\_ANNOTATIONS 151 (of 929)

ANNOTATED\_GENES Q9BXM0, P01563, P27169, O60906, Q9NPF7, P30872, Q15835, Q9HBY0, P15248, P15291, P46094, P48740, P98161, P53805, P08910, P21980, P02741, Q2T9G2, P41970, Q15465, O00294, Q16568, P80098, P00748, Q9UHA7, O15553, P30542, Q16719, O15399, P32238, P25942, P18510, P03952, P06681, P08100, P10588, P21781, P47804, O43196, P20809, P21728, P03999, Q03181, P33765, P11488, P61812, P21359, P47992, P48431, P02649, P20800, P23946, P35225, P04085, P15289, Q02763, P22466, Q16552, P01374, O60248, P09917, P14416, Q15166, P09848, P11226, Q9HCN6, P49842, P13631, P43080, P49682, Q12791, Q15150, P04839, P22891, P49815, P49356, O00590, P50148, Q02297, P05106, P08697, P02452, O95866, P23415, P41235, P18428, Q9Y5Y4, Q9Y261, P14138, P05160, P35913, P55273, P16150, P25103, P19087, Q13507, P52848, Q9UGM1, P10276, P40197, P42830, P02768, Q13224, P00751, P25189, O00175, P47871, P11831, P01009, P51685, O60840, P02753, O77932, O00187, O00238, P01127, P01222, O43636, P51671, P35243, P14770, P78363, P05111, P02748, Q6P4R8, P01286, P47900, P07359, P35542, P05113, P51679, P01031, P20908, P03951, P46092, P17927, O00555, P48546, Q12879, O95445, P30874, Q96RI0, P17677, P20941, O00254, Q13393, P37288, Q8NCG5, P22301, P26927, O15467

-- 76 of 2799--

GOID GO:0010628

TERM +positive regulation of gene expression

P-VALUE 1.94319232660652e-07  
CORRECTED P-VALUE 0.000543899532217165  
NUM\_ANNOTATIONS 99 (of 548)  
ANNOTATED\_GENES P41235, Q15306, P23497, Q9Y261, Q02962, O15350, Q9H2A3, Q6UUV9, Q06710, Q9H161, Q12951, Q9BZS1, Q9H2X6, Q04864, P23769, Q8WYB5, P10827, O43186, O00358, Q3ZCU4, O96004, P36897, Q13285, Q15465, Q96GM5, Q14623, O00468, Q6VMQ6, P11831, P15923, Q9Y294, Q9UK05, Q01196, Q9H160, P08700, P28370, P22736, O14497, Q9UIH9, P52945, O95948, O00233, P28069, O15085, P01588, Q12837, P14921, Q9Y463, P10070, Q9NP71, P01286, P56693, Q92481, P18075, P20809, Q13501, Q9UMN6, Q16650, P08151, Q13950, O75360, P33681, P48431, O94776, P54845, P15863, Q9UJU5, Q6NT51, P84022, Q05586, P55347, P40425, Q9H7Z6, Q16552, P20823, O60248, Q99958, Q13485, P49640, P04628, Q06945, O75928, O75593, P28358, Q5T230, P62988, Q9BRP0, Q9H3D4, P61296, P13631, P50553, Q5VVI0, O15178, O60244, O76054, Q07687, P19419, P35680, O15516

-- 77 of 2799--

GOID GO:0010628 + gene expression  
TERM positive regulation of gene expression  
P-VALUE 1.94319232660652e-07

CORRECTED P-VALUE 0.000543899532217165  
NUM\_ANNOTATIONS 99 (of 548)  
ANNOTATED\_GENES P41235, Q15306, P23497, Q9Y261, Q02962, O15350, Q9H2A3, Q6UUV9, Q06710, Q9H161, Q12951, Q9BZS1, Q9H2X6, Q04864, P23769, Q8WYB5, P10827, O43186, O00358, Q3ZCU4, O96004, P36897, Q13285, Q15465, Q96GM5, Q14623, O00468, Q6VMQ6, P11831, P15923, Q9Y294, Q9UK05, Q01196, Q9H160, P08700, P28370, P22736, O14497, Q9UIH9, P52945, O95948, O00233, P28069, O15085, P01588, Q12837, P14921, Q9Y463, P10070, Q9NP71, P01286, P56693, Q92481, P18075, P20809, Q13501, Q9UMN6, Q16650, P08151, Q13950, O75360, P33681, P48431, O94776, P54845, P15863, Q9UJU5, Q6NT51, P84022, Q05586, P55347, P40425, Q9H7Z6, Q16552, P20823, O60248, Q99958, Q13485, P49640, P04628, Q06945, O75928, O75593, P28358, Q5T230, P62988, Q9BRP0, Q9H3D4, P61296, P13631, P50553, Q5VVI0, O15178, O60244, O76054, Q07687, P19419, P35680, O15516

-- 78 of 2799--

GOID GO:0048732  
TERM gland development  
P-VALUE 2.88665898522429e-07  
CORRECTED P-VALUE 0.00080797584996428

NUM\_ANNOTATIONS 33 (of 120)

ANNOTATED\_GENES P18075, Q02643, Q06710, Q14469, P06401, P23769, P08151, P61812, O43435, O75360, P21359, P15291, P15863, P14651, O00358, Q3ZCU4, P36897, Q13285, Q15465, Q92838, P51843, P14416, P46109, P31249, P10071, O75603, P17482, O15296, Q02297, P10070, P01286, Q68DL5, Q99801

-- 79 of 2799--

GOID GO:0045941

TERM positive regulation of transcription

P-VALUE 3.08298736650648e-07

CORRECTED P-VALUE 0.000862928163885165

NUM\_ANNOTATIONS 97 (of 539)

ANNOTATED\_GENES P41235, Q15306, P23497, Q9Y261, Q02962, O15350, Q9H2A3, Q6UUV9, Q06710, Q9H161, Q12951, Q9BZS1, Q9H2X6, Q04864, P23769, Q8WYB5, P10827, O43186, O00358, Q3ZCU4, O96004, Q13285, Q15465, Q96GM5, Q14623, O00468, Q6VMQ6, P11831, P15923, Q9Y294, Q9UK05, Q01196, Q9H160, P28370, P22736, O14497, Q9UIH9, P52945, O95948, O00233, P28069, O15085, P01588, Q12837, P14921, Q9Y463, P10070, Q9NP71, P01286, P56693, Q92481, P18075, P20809, Q13501, Q9UMN6, Q16650, P08151, Q13950, O75360, P33681, P48431, O94776, P54845, P15863, Q9UJU5, Q6NT51, P84022, Q05586, P55347, P40425, Q9H7Z6, Q16552, P20823, O60248, Q99958, Q13485, P49640, P04628, Q06945, O75928, O75593, P28358, Q5T230, P62988, Q9BRP0, Q9H3D4, P61296, P13631, P50553, Q5VVI0, O15178, O60244, O76054, Q07687, P19419, P35680, O15516

-- 80 of 2799--

GOID GO:0010646

TERM &regulation of cell communication

P-VALUE 4.25422543489038e-07

CORRECTED P-VALUE 0.00119075769922582

NUM\_ANNOTATIONS 130 (of 784)

ANNOTATED\_GENES Q14164, O15524, P01730, Q9H2X6, Q04864, Q15835, O43324, P49796, P18545, Q9ULV8, P21980, P36897, P25054, P00797, Q16568, Q14623, Q8WUA7, P08700, A0JNU9, O95948, Q99750, P49802, P25942, O43734, P01588, O94810, P28223, P53708, Q9Y2I9, O14544, Q13191, Q13003, P20809, O95813, P21728, O75787, Q03181, O14924, P61812, Q13950, P21359, P33681, P02649, P49758, P84022, O75916, P78504, O75829, P24043, P01374, P51843, P14416, Q13485, Q9UBT3, Q6GQQ9, P50553, P49815, P17787, P01135, P23415, P49918, P18428, Q9Y5Y4, O14543, P14138, Q15628, Q68CZ1, Q6ZW31, Q9HAV5, P25098, O43147, Q13002, Q04724, O60447, Q13224, O95759, Q13972, Q08116,

Q3ZCU4, P41594, P35221, Q13956, P02753, O15519, P50150, P26441, Q9H0K1, P05111, O95081, O00233, P52594, P56373, Q13635, Q9H2H0, P13945, Q4KMP7, P36896, P01286, Q6ZT07, Q9HC96, Q02643, Q04721, P62942, P35240, P27037, P34947, Q13705, P50052, P08151, O76093, Q99490, O00555, Q07889, O15492, P28335, Q9UBU2, Q9P212, Q12879, P53041, P02760, Q06945, P62988, Q9H3D4, P32298, O14939, O60262, P48023, Q15057, Q16478, Q9UBC0

-- 81 of 2799--

GOID GO:0010646 & cell communication

TERM regulation of cell communication

P-VALUE 4.25422543489038e-07

CORRECTED P-VALUE 0.00119075769922582

NUM\_ANNOTATIONS 130 (of 784)

ANNOTATED\_GENES Q14164, O15524, P01730, Q9H2X6, Q04864, Q15835, O43324, P49796, P18545, Q9ULV8, P21980, P36897, P25054, P00797, Q16568, Q14623, Q8WUA7, P08700, A0JNU9, O95948, Q99750, P49802, P25942, O43734, P01588, O94810, P28223, P53708, Q9Y2I9, O14544, Q13191, Q13003, P20809, O95813, P21728, O75787, Q03181, O14924, P61812, Q13950, P21359, P33681, P02649, P49758, P84022, O75916, P78504, O75829, P24043, P01374, P51843, P14416, Q13485, Q9UBT3, Q6GQQ9, P50553, P49815, P17787, P01135, P23415, P49918, P18428, Q9Y5Y4, O14543, P14138, Q15628, Q68CZ1, Q6ZW31, Q9HAV5, P25098, O43147, Q13002, Q04724, O60447, Q13224, O95759, Q13972, Q08116, Q3ZCU4, P41594, P35221, Q13956, P02753, O15519, P50150, P26441, Q9H0K1, P05111, O95081, O00233, P52594, P56373, Q13635, Q9H2H0, P13945, Q4KMP7, P36896, P01286, Q6ZT07, Q9HC96, Q02643, Q04721, P62942, P35240, P27037, P34947, Q13705, P50052, P08151, O76093, Q99490, O00555, Q07889, O15492, P28335, Q9UBU2, Q9P212, Q12879, P53041, P02760, Q06945, P62988, Q9H3D4, P32298, O14939, O60262, P48023, Q15057, Q16478, Q9UBC0

-- 82 of 2799--

GOID GO:0051094

TERM positive regulation of developmental process

P-VALUE 4.40569342973468e-07

CORRECTED P-VALUE 0.00123315359098274

NUM\_ANNOTATIONS 102 (of 579)

ANNOTATED\_GENES P32745, P01563, Q9Y261, O14543, O15350, Q96IZ0, Q13188, Q13114, P42771, O95631, P32971, P53667, O00203, Q15628, Q9NYL2, P16150, P61247, Q12981, Q9H2X6, O00198, P10276, P23769, Q01955, Q9UEE5, Q13002, O43324, O43186, P01574, Q9H3Q1, P21980, P36897, P43146, P25054, Q15465, Q9UHD0, P28908, Q14623, P11831, Q01196, O00238, P31249, O15519,

Q9UL32, P22736, P00709, P30542, P52701, P05111, P02748, Q99453, P14921, P10828, P36896, Q9HC96, P18075, Q04721, P27037, P62753, P56706, Q03181, O76036, Q13705, P50052, O14788, P61812, Q13950, P15151, P21359, P33681, P02649, P50570, Q15762, Q07011, P56178, P84022, A0PK02, P98088, O14727, P78504, P22466, Q15078, P01374, O75340, Q02779, Q02156, P60953, P55211, Q96PG8, Q06945, Q6UY14, Q9H3D4, P13631, Q12791, Q9HBE4, O15304, A1A4U0, P63241, O00755, O15296, Q02297, P06213, P32970

-- 83 of 2799--

GOID GO:0009888

TERM tissue development

P-VALUE 4.67222162440712e-07

CORRECTED P-VALUE 0.00130775483267155

NUM\_ANNOTATIONS 79 (of 417)

ANNOTATED\_GENES Q08188, Q9Y261, P09017, Q01534, P13942, Q15628, O60882, Q9NRC9, P05549, O15353, Q9HAV5, P32856, P10827, Q14532, P98161, O00358, P02818, Q3ZCU4, O96004, Q13285, Q15465, Q92838, P16615, Q14623, Q13753, O00238, P31249, P10767, P34820, P08842, P13497, Q12870, P19235, P10828, Q68DL5, P36896, P21781, P18075, P27037, Q9GZV9, Q03181, Q9C019, Q13705, P20908, P08151, P61812, P22003, Q13950, P25391, P12645, O76093, Q6NT51, P14651, O14753, O75829, O60248, Q03431, Q99958, P17677, O75593, O95450, P08620, P35527, P56703, O15156, O43248, O00755, O15178, Q03052, P21246, O95390, O95947, Q07687, Q92786, O43763, P02452, Q9UBC0, Q9UKW6, O95863

-- 84 of 2799--

GOID GO:0048699

TERM generation of neurons

P-VALUE 4.99235746805313e-07

CORRECTED P-VALUE 0.00139736085530807

NUM\_ANNOTATIONS 93 (of 516)

ANNOTATED\_GENES Q9Y261, O95754, Q02962, O95185, Q9H2A3, P14138, O94788, O95631, P53667, P09544, Q14469, P23769, Q15835, O43186, O75093, Q13972, Q16518, P36897, P43146, Q15465, P35221, O00468, P11831, O00238, P31249, P28370, P10071, O95948, Q12955, Q01726, P47928, P32238, Q99453, O14813, Q12837, P49335, P10070, P32297, P10588, O43711, Q13214, Q15784, O60663, P18075, P98172, O14514, O60890, Q9UBY8, P21728, Q9H2C1, P51679, Q16650, P31273, P61812, P21359, Q8IYT8, P48431, P02649, P41743, P54845, P56178, A0PK02, O00555, P78504, O15522, Q15078, O14786, O00634, Q13402, P14416, Q13485, P49640, P17677, P04628, P62988, P28358, O75094, P50553,

Q12791, O60609, P17787, A1A4U0, O00755, O60462, Q15768, Q07687, P50148, P19622, O00144, Q99835, Q15319, O43763, O94887

-- 85 of 2799--

GOID GO:0048468

TERM cell development

P-VALUE 6.22880166483044e-07

CORRECTED P-VALUE 0.00174344158598604

NUM\_ANNOTATIONS 137 (of 842)

ANNOTATED\_GENES Q02962, O95631, P53667, P09544, Q14469, Q15835, O43186, P15291, P36897, P25054, Q15465, Q9Y236, Q14623, P10767, P28370, P10071, O95948, P32238, Q99453, P01588, Q12837, Q9Y463, P10588, Q13214, Q15784, O60663, P98172, O14514, Q9Y698, P21728, P06401, Q16650, P61812, Q13950, P21359, P48431, P02649, A0PK02, P78504, O43184, Q08289, Q13467, O15522, Q9NS25, O15146, O60248, P14416, Q13485, P49640, P28358, O75602, Q9BRP0, P61296, P50553, Q12791, Q9HBE4, O60609, P17787, A1A4U0, O00755, O95390, O60462, Q03052, Q15768, Q13461, P50148, P19622, Q02297, Q9Y261, Q9UHL0, O95185, O95754, P14138, Q9H2A3, O94788, P23769, O75093, Q13972, Q3ZCU4, Q16518, P43146, P35221, O00468, P11831, P31249, O00238, P05556, Q8N196, Q01726, Q12955, P47928, O14813, Q5UIP0, P49335, P10070, P32297, O43711, P56693, Q02643, P18075, O60890, Q04721, P35240, Q9UBY8, Q9H2C1, P51679, P31273, Q8IYT8, P41743, P54845, O76093, Q6NT51, O00555, P56178, Q00597, Q16254, Q15078, Q12879, Q03431, O14786, O00634, Q13402, P04628, P17677, O60383, P62988, P08620, O75094, P15382, Q07687, O00144, O95259, Q15319, Q99835, O43763, O94887, Q9UBC0

-- 86 of 2799--

GOID GO:0065008

TERM regulation of biological quality

P-VALUE 7.04888496178582e-07

CORRECTED P-VALUE 0.00197298290080385

NUM\_ANNOTATIONS 249 (of 1720)

ANNOTATED\_GENES Q9BXM0, Q9Y6N9, O15524, O15079, P42771, P01258, P09544, P23582, Q9BZS1, Q9HBY0, Q9Y2B4, P46094, Q9NPA1, Q8NFM1, P21980, P02818, Q9UKY0, O14773, P36897, Q13285, P30988, P25054, Q15465, P51582, P00797, Q16568, Q05329, P43220, P80098, P22607, P17509, P00748, P47901, Q9Y2G8, P43681, Q9UK05, O00222, Q01082, O94864, O76003, Q9H160, P52945, Q9NZ71, O14746, P31213, Q99750, P32238, P25942, P41146, O76041, P01588, P03952, O15085, Q04844, P14921, Q6W4X9, Q9BS26, P28223, P19235, P15313, O14544, P05067, P12821, P17542, A2NWD3, Q13003, O43731, P01225, Q92506,

P20809, Q9Y698, Q9GZV9, Q13813, P21728, O75787, Q03181, P30041, P35670, O14788, P61812, P21359, P47992, P15311, O95477, P48431, P02649, O95461, Q13087, P20800, P04085, Q05586, P84022, P41180, P22466, O15146, P01130, O95835, Q86W47, P47775, Q13485, P14416, P13569, P55157, Q9HCN6, P13631, P06744, P49682, Q12791, Q15150, P22891, Q86YL7, P17787, O00755, P52907, Q03052, P50148, O00115, P05106, P06213, P23415, P41235, Q9NPB6, P46952, O14604, Q13177, Q9Y261, O14543, O75508, O15350, P14138, O94788, P05160, P55273, P55073, P21918, Q9Y566, P40197, P62736, P25098, P04278, P02768, O60312, Q13224, Q30201, P31645, O00358, Q9H3Q1, P47989, O75445, P25189, O43603, P61106, Q9Y691, P04180, P47871, O00468, O00329, P11831, P01009, P49959, P51685, P02753, P01127, P50150, P16520, O43636, P51671, O60344, P14770, P05111, P11473, P78363, P02748, O00233, Q86US8, Q5UIP0, P00439, P21802, Q13370, Q9NP71, P32297, P01286, P36896, O95389, P46597, O00482, P06727, P07359, P47900, Q9HC96, P19099, Q02643, Q04721, Q9UBY8, O95271, Q02505, P62753, P27037, Q9UP95, Q14940, P47756, Q9H0E9, P08588, P51679, P50052, Q9NP58, P03951, P46092, O00555, P09327, Q00597, P47944, Q9Y210, P55347, Q5Bjf2, P28335, Q16254, Q9P212, P20823, Q12879, P30048, O75366, Q03431, P14672, Q96RI0, P17677, O43704, O60383, P62263, P25100, Q16206, P62988, P08620, P35368, Q9H3D4, O14994, O75603, P35251, O00254, P32245, P57727, Q9UKL4, P37288, Q16478, P32247, P22301, P26927, Q9NRC6, P17516

-- 87 of 2799--

GOID GO:0008277

TERM regulation of G-protein coupled receptor protein signaling pathway

P-VALUE 7.6849764065965e-07

CORRECTED P-VALUE 0.00215102489620636

NUM\_ANNOTATIONS 18 (of 47)

ANNOTATED\_GENES Q9Y5Y4, Q13956, P50150, O14924, P34947, P32298, Q15835, O14939, O60262, P25098, P49802, P49796, P49758, P18545, O94810, O75916, O15492, Q9P212

-- 88 of 2799--

GOID GO:0009416

TERM response to light stimulus

P-VALUE 7.70187522388033e-07

CORRECTED P-VALUE 0.0021557548751641

NUM\_ANNOTATIONS 37 (of 148)

ANNOTATED\_GENES P47804, P35913, O60921, P55273, P21728, P19087, P03999, Q13507, P11488, Q15835, P21359, Q05586, O60721, Q12879, O00294, Q9Y253, O75161, P24385, P55211, P14416, Q01064, O60840, P20941, P35368,

A0PJA9, Q86UA6, O43636, P43080, P35243, Q01726, P52701, P78363, P17787,  
P08100, O15259, O15516, P10588

-- 89 of 2799--

GOID GO:0003013

TERM circulatory system process

P-VALUE 8.67539795493283e-07

CORRECTED P-VALUE 0.0024282438875857

NUM\_ANNOTATIONS 53 (of 248)

ANNOTATED\_GENES P19099, P50391, P42898, P14138, P09544, O75787,  
P23582, P08588, P33765, P50052, P61812, Q01955, P62736, P10827, P25098, P02649,  
Q02446, P20800, P08519, Q16635, O95759, P53805, P28335, Q16254, Q9NZM1,  
Q9UJ96, P00797, Q16568, P43220, Q14500, Q9Y691, P17661, P47871, Q86W47,  
P14416, P47901, P08172, P13569, Q07955, P25100, Q9Y3Q4, P35368, P50222,  
P16520, Q12791, P01588, P52564, P37288, P34969, P28223, P32247, P15382, P12821

-- 90 of 2799--

GOID GO:0008015

TERM blood circulation

P-VALUE 8.67539795493283e-07

CORRECTED P-VALUE 0.0024282438875857

NUM\_ANNOTATIONS 53 (of 248)

ANNOTATED\_GENES P19099, P50391, P42898, P14138, P09544, O75787,  
P23582, P08588, P33765, P50052, P61812, Q01955, P62736, P10827, P25098, P02649,  
Q02446, P20800, P08519, Q16635, O95759, P53805, P28335, Q16254, Q9NZM1,  
Q9UJ96, P00797, Q16568, P43220, Q14500, Q9Y691, P17661, P47871, Q86W47,  
P14416, P47901, P08172, P13569, Q07955, P25100, Q9Y3Q4, P35368, P50222,  
P16520, Q12791, P01588, P52564, P37288, P34969, P28223, P32247, P15382, P12821

-- 91 of 2799--

GOID GO:0007186

TERM G-protein coupled receptor protein signaling pathway

P-VALUE 9.23941230646285e-07

CORRECTED P-VALUE 0.00258611150457895

NUM\_ANNOTATIONS 250 (of 1734)

ANNOTATED\_GENES P50391, P30550, P22888, O15130, P01258, Q14416,  
Q00722, P32302, Q8N6U8, Q9NYV8, Q9NYW3, P30872, Q9BZC5, P47898,  
Q15835, O95918, P49796, P12872, P46094, P18545, P98161, P52824, P63211,  
P46091, Q96G91, P30939, P21980, O43614, Q9Y585, P30988, Q15077, P51582,  
Q8WU20, Q16568, P43220, P21731, Q9GZP7, P47901, P08172, Q5UAW9, O00222,

Q8WXV1, Q6NTB5, O95157, P35372, P30542, Q9UGF7, Q9H255, P49802, P32238, P48169, P30989, P41146, O15085, O43193, O94810, P34969, P28223, P29371, P08173, Q15613, P08100, Q13258, P47804, O95264, O14843, P34981, O14514, Q9NYV7, P46093, P21728, P03999, P50406, P33765, O14804, O76002, O14924, Q9NS67, P34998, P28336, P11488, O00155, O95477, P41586, O60755, P02649, Q9Y3N9, O95800, P49758, O43194, O00253, O75388, Q9HCQ7, O43898, Q13639, O75916, P41180, Q13467, P60893, P34995, P21452, P22466, P49146, O14581, P47775, P14416, P58173, P47881, O60726, Q15761, O43749, P28476, Q9NYW1, P49682, O43789, Q13324, P08912, P10082, P34903, P47890, A1L156, P49286, O00590, Q14CE0, P15514, P50148, P06213, P28222, P23415, P32745, Q9Y5Y4, P58182, P23945, O60404, Q9UKL2, P25103, P19087, P47887, P21918, Q9NTG1, P25098, Q01362, O60403, Q08116, Q13607, Q9HB89, P41594, O43612, O43603, Q9NYV9, O76099, P47871, O00468, P46089, Q14968, P51685, Q13956, O00325, Q5IFH6, P09471, P01222, P50150, P16520, Q15618, O43192, Q13255, Q01726, P49685, Q9NZD1, P31391, Q99928, O00230, A4QMS5, O43613, P21554, P13945, Q06481, P25021, P41145, Q96R84, P01286, P47900, P34982, Q02643, P33032, Q9P1P5, O95838, P47211, O43813, Q9NS66, Q7Z4W6, P08588, P35348, P51679, P01031, P34947, O95136, O95158, Q14831, P50052, P47872, P41587, P47870, Q9NYW0, P48039, P46092, O00555, O15492, P28335, Q9NYW6, Q9P212, Q15078, P48546, Q01718, O95672, P30874, Q03431, P28221, P08949, Q96RI0, O60883, P17677, P30968, P25100, Q99061, P31644, P20941, P35368, O60242, P32298, Q99677, P04201, P23416, Q9NQN1, O60262, O00574, P34972, O14939, O00254, P32245, Q6NV75, P28566, Q13606, P41143, P37288, P32247, O00144, P41968, Q99835, O95222

-- 92 of 2799--

GOID GO:0045165

TERM cell fate commitment

P-VALUE 9.28677299079681e-07

CORRECTED P-VALUE 0.00259936776012403

NUM\_ANNOTATIONS 38 (of 155)

ANNOTATED\_GENES Q9Y261, Q02962, Q9H2A3, Q04721, Q14469, Q9C019, P23769, Q13950, P48431, P78504, P36897, Q15465, P55895, Q13485, P49640, P17677, P04628, P15923, Q14318, P28358, P31270, P05556, P11487, P10071, P50553, O95948, P56703, Q14DW8, Q15303, O43248, O95947, Q07687, P10070, P78424, Q92786, Q9UBC0, P17542, O43711

-- 93 of 2799--

GOID GO:0007631

TERM feeding behavior

P-VALUE 9.79718327575538e-07  
CORRECTED P-VALUE 0.00274223159888393  
NUM\_ANNOTATIONS 20 (of 57)  
ANNOTATED\_GENES P50391, P21728, Q14831, Q12870, P32245, O60755,  
P17787, P32238, P42127, P10082, O00253, Q13224, O43614, P32247, O43613,  
P28335, P22466, O43612, O43603, Q16568

-- 94 of 2799--

GOID GO:0022008

TERM neurogenesis

P-VALUE 1.01471729905576e-06  
CORRECTED P-VALUE 0.00284019372005707  
NUM\_ANNOTATIONS 97 (of 553)  
ANNOTATED\_GENES Q9Y261, O95754, Q02962, O95185, Q9H2A3, P14138,  
O94788, O95631, P53667, P09544, Q14469, P23769, Q15835, O43186, O75093,  
Q13972, Q16518, P36897, P43146, Q15465, P35221, O00468, P11831, O00238,  
P31249, P28370, P10071, O95948, Q12955, Q01726, P47928, P32238, Q99453,  
O14813, Q12837, P49335, P10070, P32297, P10588, O43711, Q13214, Q15784,  
P56693, O60663, P18075, P98172, O14514, O60890, Q9UBY8, P35240, P21728,  
Q9H2C1, P51679, Q16650, P31273, P61812, P21359, Q8IYT8, P48431, P02649,  
P41743, P54845, P56178, A0PK02, O00555, P78504, O15522, Q15078, Q12879,  
O14786, O00634, Q13402, P14416, Q13485, P49640, P17677, P04628, P62988,  
P28358, O75094, P50553, Q12791, O60609, P17787, A1A4U0, O00755, O60462,  
Q03052, Q15768, Q07687, P50148, P19622, O00144, Q99835, Q15319, O43763,  
O94887

-- 95 of 2799--

GOID GO:0008285

TERM negative regulation of cell proliferation

P-VALUE 1.25221752936224e-06  
CORRECTED P-VALUE 0.0035049568646849  
NUM\_ANNOTATIONS 68 (of 351)  
ANNOTATED\_GENES P49918, P32745, P41235, P35548, Q96IZ0, P42771,  
P09544, P55273, P16150, Q9BZS1, P56545, P30872, Q01955, O43324, P01574,  
P15291, P51531, Q14201, P25054, Q15465, P35221, P06748, P28908, P02753,  
Q8N196, P10071, O14683, P35372, P52945, Q99445, P31391, P28069, P14921,  
Q99801, P18075, Q04721, O14514, O95813, P35240, P35348, P61812, P21359,  
O15540, P02649, Q07011, P98088, P98177, O15522, P22466, Q14512, P01374,  
Q03431, P30874, P15531, P14416, Q13485, Q14582, Q9BRP0, P13631, P49356,  
P49815, O15296, O95390, P22301, O95995, Q92786, Q00987, Q12824

-- 96 of 2799--

GOID GO:0007586

TERM digestion

P-VALUE 1.86726621281331e-06

CORRECTED P-VALUE 0.00522647812966445

NUM\_ANNOTATIONS 28 (of 101)

ANNOTATED\_GENES P06727, P01130, P30874, P50391, P46098, Q02505, P12104, P47211, P02753, P30872, P14091, P47872, O14815, Q06520, Q12791, P01298, P11473, P32238, P10082, O43193, P98088, Q6W4X9, Q16820, Q14032, Q3SYC2, P12821, P00790, O43603

-- 97 of 2799--

GOID GO:0031324

TERM negative regulation of cellular metabolic process

P-VALUE 2.62809902681755e-06

CORRECTED P-VALUE 0.00735604917606232

NUM\_ANNOTATIONS 115 (of 698)

ANNOTATED\_GENES P51786, P23497, O14604, Q9Y2Y4, Q02962, Q96IZ0, O15524, P42771, P01258, Q00577, P55273, Q14469, Q96JB3, Q9BZS1, O00409, P05154, O75427, Q8WYB5, P10827, P01574, Q04724, Q15466, O00358, Q3ZCU4, O96004, P16989, P41970, Q07666, P25054, Q15465, Q9Y576, Q6VMQ6, Q9NP08, O43251, Q9Y294, O00222, Q01082, P01127, O95125, P10071, P35227, Q15697, Q86UT5, P52945, Q99750, P52701, P05111, P47928, P11473, O43829, Q8N6T7, Q12837, P10070, Q9NP71, P06727, Q99742, O00488, O60921, Q9UBY8, P35240, Q13813, P54259, Q03181, P47756, O75446, P31273, Q13950, P17098, O75360, P48431, O94776, Q9Y6E7, Q9UJU5, Q6NT51, P04085, P84022, P09327, O00555, O14753, A2RRE3, Q01658, P63279, P28335, P49454, O95365, Q9H7Z6, Q9BQ70, P11137, O75366, O60248, Q15406, O43439, P51843, Q14582, Q13485, O43593, P62263, Q9Y2Y8, O75593, O75469, P35368, Q9BRP0, Q01094, Q9H3D4, P48380, P13631, O00425, P52907, Q07687, Q02297, P22301, Q00987, Q13506, Q9NRC6, Q14190
